# Supplementary material for: High-Resolution Mapping in Two RIL Populations Refines Major “QTL Hotspot” Regions for Seed Size and Shape in Soybean (Glycine max L.)
Source: Int J Mol Sci. 2020 Feb 4;21(3):1040. doi: 10.3390/ijms21031040 (PMC7038151; doi:10.3390/ijms21031040)
Supplement: Supplementary file 1 [file ijms-21-01040-s001.xlsx]

## Sheet: Table S1
Supplementary Table S1. Descriptive statistics, broad-sense heritability (h2) of Seed Shape & size traits evaluated in two recombinant inbred lines (RILs) ZY &K3N . The RILs and the parent were grown in different field environments of years and locations. * &** represent significance at 5% and 1%, respectively
RIL	Trait	Environment	Parent (Mean ± SD) T.test for parents						RIL Population
			Nannong1138-2	Zhengyanghuangdou	Significance	N	Mean	Min	Max	CV(%)	Kurtosis	Skewness	h2 (%)
ZY	SL	2012FY (E1)	8.33± 0.024	7.12± 0.021	0.03*	236	7.11947	6.115	8.155	2.93068	0.0856019	0.212892	92.5291
	SW		6.55 ± 0.02	5.52 ± 0.03	0.31**		6.07794	5.375	6.83	3.03359	-0.064206	0.0435814	89.6572
	ST		5.77 ±0.08	4.70± 0.17	0.22**		4.7068	3.745	5.63	6.27647	0.286638	-0.0615445	87.942
	SLW		1.17± 0.08	1.24 ± 0.017	0.03**		1.17156	1.06606	1.28986	4.78432	0.108976	0.132625	85.8062
	SLT		1.37 ± 0.02	1.47 ± 0.01	0.01*		1.51776	1.29574	1.80915	2.96413	-0.335019	0.20771	84.2021
	SWT		1.13 ± 0.01	1.31 ± 0.07	0.08*		1.29511	1.15628	1.4753	4.00864	0.285373	0.319021	93.1377
	SL	2012JP (E2)	8.24 ± 0.10	7.18± 0.12	0.02*	236	7.06	5.885	8.095	3.80404	-0.111342	-0.135328	91.3523
	SW		6.15 ± 0.04	5.94 ± 0.04	0.58**		6.08	5.27	6.945	3.77901	0.122523	-0.196794	88.4785
	ST		5.31 ± 0.19	4.68 ± 0.13	0.06*		4.7	3.675	5.615	5.33097	0.147819	-0.140787	89.7912
	SLW		1.18± 0.01	1.25± 0.03	0.08*		1.16	1.06682	1.29918	3.41939	0.502419	0.420838	79.2632
	SLT		1.37± 0.008	1.49± 0.01	0.05*		1.5	1.29828	1.75627	4.92576	-0.303049	0.397922	87.3272
	SWT		1.13 ± 0.01	1.32 ± 0.06	0.05*		1.29	1.12105	1.45043	4.24948	-0.197659	0.104836	81.1906
	SL	2017JP (E3)	7.69 ± 0.14	6.87±0.05	0.72**		7.39856	6.3855	8.5365	4.82895	-0.125971	0.272573	79.57
	SW		6.55± 0.02	5.52 ±0.03	0.62**	236	6.17687	5.3805	7.087	5.43598	0.201975	0.141972	63.7706
	ST		5.77 ±0.08	4.20 ± 0.05	0.92**		4.97021	4.007	6.021	6.85265	0.209392	-0.0885791	71.369
	SLW		1.17± 0.08	1.24±0.01	0.59**		1.19874	1.11375	1.32935	2.30331	-0.413247	0.18856	90.9209
	SLT		1.33± 0.04	1.64 ±0.07	0.78**		1.49521	1.29833	1.84641	3.93808	0.122576	0.427696	92.0368
	SWT		1.13 ± 0.01	1.31± 0.07	0.08*		1.24673	1.14264	1.49226	2.94929	1.29017	0.744315	91.3433
RIL	Trait	Environment	Parent (Mean ± SD) T.test for parents			RIL Population
			Nannong1138-2	KeFeng	Significance	N	Mean	Min	Max	CV(%)	Kurtosis	Skewness	h2 (%)
K3N	SL	2012FY (E1)	7.74±0.12	7.00±0.15	0.87**	91	7.82181	7	9.015	3.20185	0.0906693	0.310678	93.3577
	SW		6.98±0.01	6.76± 0.14	0.21**		6.67989	6.005	7.5	7.53725	0.771382	0.280201	88.9271
	ST		6.29± 0.15	5.88± 0.12	0.16**		5.80236	4.865	6.665	2.89526	0.409762	-0.122217	94.1437
	SLW		1.10± 0.03	1.14± 0.005	0.19**		1.17113	1.09265	1.29035	4.6858	-0.0282535	0.510433	87.1465
	SLT		1.22± 0.06	1.29± 0.008	0.27**		1.35106	1.16733	1.5608	3.03933	0.0863347	0.362742	95.9053
	SWT		1.11± 0.02	1.15 ± 0.01	0.22**		1.15347	1.03997	1.28058	7.33644	-0.503576	0.284488	65.6494
	SL	2012JP (E2)	7.79± 0.03	7.72± 0.06	0.31**	91	7.67335	6.87	8.815	4.45696	0.242423	0.443573	74.4498
	SW		7.10± 0.03	6.99 ± 0.14	0.70**		6.64	6.075	7.51	3.31493	0.224498	0.590454	65.2109
	ST		6.36± 0.13	6.52± 0.11	0.32**		5.74566	4.705	6.465	4.64451	1.21604	-0.398045	76.7412
	SLW		1.09± 0.04	1.10 ± 0.01	0.87**		1.15665	1.05242	1.3069	3.18016	-0.00386129	0.428152	86.496
	SLT		1.22± 0.01	1.18 ± 0.01	0.12**		1.33899	1.11707	1.64543	4.85043	0.957587	0.564601	79.5235
	SWT		1.11± 0.02	1.07± 0.02	0.12**		1.15742	1.04505	1.32412	3.78863	1.66214	0.828412	69.9691
	SL	2017JP (E3)	7.99± 0.17	7.72± 0.06	0.24**	91	8.11151	7.2955	8.9345	4.16406	-0.697103	0.139081	77.4662
	SW		6.92 ± 0.09	6.88 ± 0.14	0.59**		6.89757	6.3125	7.3305	2.70167	-0.129717	-0.413743	87.675
	ST		6.26 ± 0.05	6.05 ± 0.15	0.05*		6.16616	5.3135	6.963	4.39289	1.3231	-0.0267103	70.9637
	SLW		1.15 ± 0.01	1.10 ± 0.01	0.07*		1.17561	1.08888	1.28657	3.82947	-0.660711	0.155975	81.7904
	SLT		1.29 ± 0.04	1.18 ± 0.01	0.08*		1.31645	1.18021	1.504	5.046	-0.159482	0.189933	68.9048
	SWT		1.12 ± 0.02	1.07 ± 0.02	0.11**		1.1197	1.04188	1.24419	4.14423	1.34163	0.415184	64.0287
Combined environment broad-sense heritability
Trait	ZY-RIL Population	K3N-RIL Population
SL	72.3027	84.2175
SW	64.9896	72.4292
ST	97.3379	80.7226
SLW	65.7538	77.3109
SLT	98.5273	83.7526
SWT	98.5773	65.7737

## Sheet: Table S2
Table S2 : Combined analysis of variance (ANOVA) for Seed shape & size trait (SL,SW,ST,SLW,SLT,SWT) in ZY & K3N RIL Populations across three different environments (2012FY, 2012JP and 2017JP)
RIL	Trait		Seed Length (SL)
ZY	Source	DF	SS	MS	F-value	Pr > F
	Environment	2	31.019	15.5095	184.17	<.0001
	Rep(Enviro)	3	47.5293	15.8431	188.13	<.0001
	Genotype	235	71.4513	0.304048	3.61	<.0001
	Genotype x Environment	470	129.633	0.275814	3.28	<.0001
	Error	703	59.2015	0.084213
	Trait		Seed Width (SW)
	Environment	2	2.93972	1.46986	22.58	<.0001
	Rep(Enviro)	3	37.4522	12.4841	191.75	<.0001
	Genotype	235	43.6996	0.185956	2.86	<.0001
	Genotype x Environment	470	71.4906	0.152108	2.34	<.0001
	Error	703	45.7683	0.065104
	Trait		Seed Thickness (ST)
	Environment	2	0.011423	0.005712	0.08	0.9274
	Rep(Enviro)	3	36.3685	12.1228	159.94	<.0001
	Genotype	235	669.101	2.84724	37.56	<.0001
	Genotype x Environment	471	94.4251	0.200478	2.64	<.0001
	Error	700	53.0581	0.075797
	Trait		Seed length to width (SLW)
	Environment	2	0.35513	0.177565	140.57	<.0001
	Rep(Enviro)	3	0.013676	0.004559	3.61	0.0131
	Genotype	235	0.866774	0.003688	2.92	<.0001
	Genotype x Environment	470	1.55016	0.003298	2.61	<.0001
	Error	703	0.887986	0.001263
	Trait		Seed length to thickness (SLT)
	Environment	2	0.087169	0.043585	9.08	0.0001
	Rep(Enviro)	3	0.259063	0.086354	17.99	<.0001
	Genotype	235	76.6104	0.326002	67.9	<.0001
	Genotype x Environment	471	8.60866	0.018277	3.81	<.0001
	Error	700	3.36093	0.004801
	Trait		Seed width to thickness (SWT)
	Environment	2	0.001793	0.000896	0.36	0.6977
	Rep(Enviro)	3	0.099249	0.033083	13.29	<.0001
	Genotype	235	41.1127	0.174948	70.29	<.0001
	Genotype x Environment	471	3.29858	0.007003	2.81	<.0001
	Error	700	1.7422	0.002489
RIL	Trait		Seed Length (SL)
K3N	Source	DF	SS	MS	F-value	Pr > F
	Environment	2	17.4211	8.71057	104.87	<.0001
	Rep(Enviro)	3	2.20815	0.736051	8.86	<.0001
	Genotype	90	47.3668	0.526297	6.34	<.0001
	Genotype x Environment	180	28.3742	0.157635	1.9	<.0001
	Error	266	22.0947	0.083063
	Trait		Seed Width (SW)
	Environment	2	6.64433	3.32216	66.3	<.0001
	Rep(Enviro)	3	0.947544	0.315848	6.3	0.0004
	Genotype	90	16.3563	0.181736	3.63	<.0001
	Genotype x Environment	180	18.7651	0.104251	2.08	<.0001
	Error	266	13.3282	0.050106
	Trait		Seed Thickness (ST)
	Environment	2	17.6635	8.83175	130.68	<.0001
	Rep(Enviro)	3	1.83112	0.610375	9.03	<.0001
	Genotype	90	31.5528	0.350586	5.19	<.0001
	Genotype x Environment	180	20.481	0.113783	1.68	<.0001
	Error	266	17.9774	0.067584
	Trait		Seed length to width (SLW)
	Environment	2	0.034148	0.017074	7.27	0.0008
	Rep(Enviro)	3	0.005183	0.001728	0.74	0.5317
	Genotype	90	0.931804	0.010353	4.41	<.0001
	Genotype x Environment	180	0.533727	0.002965	1.26	0.0424
	Error	266	0.624867	0.002349
	Trait		Seed length to thickness (SLT)
	Environment	2	0.101945	0.050973	11.37	<.0001
	Rep(Enviro)	3	0.017715	0.005905	1.32	0.2691
	Genotype	90	2.48278	0.027586	6.15	<.0001
	Genotype x Environment	180	1.30558	0.007253	1.62	0.0002
	Error	266	1.19229	0.004482
	Trait		Seed width to thickness (SWT)
	Environment	2	0.192416	0.096208	31.77	<.0001
	Rep(Enviro)	3	0.0196	0.006533	2.16	0.0934
	Genotype	90	0.796189	0.008847	2.92	<.0001
	Genotype x Environment	180	0.507963	0.002822	0.93	0.6933
	Error	266	0.8054	0.003028

## Sheet: Table S3
Table S3 : Correlation analysis among six Seed size/shape traits (SL,SW,ST,SLW,SLT,SWT). * &** represent significance at 5% and 1%, respectively.
	ZY		SL	SW	ST	SLW	SLT	SWT
		SL	1	0.78**	0.62**	0.44**	0.15**	-0.13*
		SW		1	0.78**	-0.20**	-0.25**	-0.16*
		ST			1	-0.15*	-0.67**	-0.73**
		SLW				1	0.60**	0.02
		SLT					1	0.80**
		SWT						1
	K3N		SL	SW	ST	SLW	SLT	SWT
		SL	1	0.60**	0.42**	0.55**	0.41**	-0.002
		SW		1	0.69**	-0.20**	-0.16	-0.01
		ST			1	-0.13	-0.60**	-0.64**
		SLW				1	0.59**	-0.007
		SLT					1	0.614**
		SWT						1

## Sheet: Table S4
Supplementary Table S4: Model genes within cluster-06, cluster-10, cluster-13 and cluster-20 regions in both RIL Populations (ZY & K3N)
Descriptions of columns. Numbers indicated in column headers.
(1) GlymaID from Gmax version 1.1 release. For more information see http://phytozome.jgi.doe.gov/pz/portal.html#!info?alias=Org_Gmax. Only primary proteins were analyzed.
(2) Top Uniref100 BlastP Hit. Match determined via BLASTP of Glyma1.1 primary proteins against Uniref100 (version 11/26/2012). Minimum e-value score E<10-6 required. Percent coverage determined by dividing the top high scoring pair length by predicted protein length.
(3) Top Descriptive Uniref100 Blastp Hit (3). The BLAST report generated above (2) was parsed to eliminate uninformative hits. Hits including the words uncharacterized, putative, related, predicted, orf, expressed or containing Arabidopsis or Rice gene identifiers (AtXgXXXXX, OsXXgXXXXX) were ignored. Minimum e-value score E<10-6 required. Percent coverage determined by dividing the top high scor…
(4) Top TAIR10 Blastp Hit (4). Match determined via BLASTP of Glyma1.1 primary proteins against Arabidopsis thaliana proteins (TAIR10). Minimum e-value score E<10-6 required. Percent coverage determined by dividing the top high scoring pair length by predicted protein length.
(5) Gene Ontology Biological Process. GO Biological Process terms were assigned to each GlymaID using the GO terms associated with the Top TAIR10 Blastp Hit (4). The annotation information was obtained from TAIR v 10.
(6) Gene Ontology Molecular Function. GO Molecular Function terms were assigned to each GlymaID using the GO terms associated with the Top TAIR10 Blastp Hit (4). The annotation information was obtained from TAIR v 10.
(7) Gene Ontology Cellular Component. GO Cellular Component terms were assigned to each GlymaID using the GO terms associated with the Top TAIR10 Blastp Hit (4). The annotation information was obtained from TAIR v 10.
(8) PFAM IDs assigned by Phytozome. For more information see http://phytozome.jgi.doe.gov/pz/portal.html#!info?alias=Org_Gmax.
(9) PANTHER IDs assigned by Phytozome. For more information see http://phytozome.jgi.doe.gov/pz/portal.html#!info?alias=Org_Gmax.
(10) KOG IDs assigned by Phytozome. For more information see http://phytozome.jgi.doe.gov/pz/portal.html#!info?alias=Org_Gmax.
(11) EC IDs assigned by Phytozome. For more information see http://phytozome.jgi.doe.gov/pz/portal.html#!info?alias=Org_Gmax.
(12) KO IDs assigned by Phytozome. For more information see http://phytozome.jgi.doe.gov/pz/portal.html#!info?alias=Org_Gmax.
cluster-06
Glyma 1.1 ID (1)	Protein Length (AA)	Top Uniref100 Blastp Hit (2)	E-value (E<10-6)	% Coverage	Top Descriptive Uniref100 Blastp Hit (3)	E-value (E<10-6)	% Coverage	Top TAIR10 Blastp Hit (4)	E-value (E<10-6)	Coverage	Gene Ontology Biological Process IDs (5)	Gene Ontology Biological Process Descriptions	Gene Ontology Molecular Function IDs (6)	Gene Ontology Molecular Function Descriptions	Gene Ontology Cellular Component IDs (7)	Gene Ontology Cellular Component Descriptions	PFAM IDs (8)	PFAM_Descriptions	Panther IDs (9)	Panther_Descriptions	KOG IDs (10)	KOG_Desctiptions	EC IDs (11)	EC_Descriptions	KO IDs (12)	KO_Descriptions
Glyma06g02190	605	UniRef100_UPI0002339778 UPI0002339778 related cluster n=1 Tax=unknown RepID=UPI0002339778	0	83.47	UniRef100_B9REV6 Pentatricopeptide repeat-containing protein, putative n=1 Tax=Ricinus communis RepID=B9REV6_RICCO	0	81.98	AT2G06000.2 | Symbols: | Pentatricopeptide repeat (PPR) superfamily protein | chr2:2328000-2329610 REVERSE LENGTH=536	5e-166	79.34	GO:0008150	biological process	GO:0003674	molecular function	GO:0005739	mitochondrion	PF01535	PPR repeat	PTHR24015	FAMILY NOT NAMED	NA	NA	NA	NA	NA	NA
Glyma06g02200	697	UniRef100_I1K7F0 Uncharacterized protein n=1 Tax=Glycine max RepID=I1K7F0_SOYBN	0	99.86	UniRef100_B9GQ31 Precursor of protein cell division protease ftsh-like protein n=1 Tax=Populus trichocarpa RepID=B9GQ31_POPTR	0	99.28	AT5G42270.1 | Symbols: VAR1, FTSH5 | FtsH extracellular protease family | chr5:16902659-16905102 FORWARD LENGTH=704	0	98.85	GO:0006098 GO:0006508 GO:0009773 GO:0010205 GO:0010304 GO:0019761 GO:0030163	pentose-phosphate shunt; proteolysis; photosynthetic electron transport in photosystem I; photoinhibition; PSII associated light-harvesting complex II catabolic process; glucosinolate biosynthetic process; protein catabolic process	GO:0000166 GO:0004176 GO:0004222 GO:0005524 GO:0008237 GO:0016887 GO:0017111	nucleotide binding; ATP-dependent peptidase activity; metalloendopeptidase activity; ATP binding; metallopeptidase activity; ATPase activity; nucleoside-triphosphatase activity	GO:0009507 GO:0009534 GO:0009535 GO:0009579 GO:0009941 GO:0016020	chloroplast; chloroplast thylakoid; chloroplast thylakoid membrane; thylakoid; chloroplast envelope; membrane	PF01434 PF00004	Peptidase family M41; ATPase family associated with various cellular activities (AAA)	PTHR23076	METALLOPROTEASE M41 FTSH	KOG0731	AAA+-type_ATPase_containing_the_peptidase_M41_domain	3.4.24.-	Metalloendopeptidases	K03798	cell_division_protease_FtsH_[EC:3.4.24.-]
Glyma06g02210	506	UniRef100_I1K7F1 Uncharacterized protein n=2 Tax=Glycine max RepID=I1K7F1_SOYBN	0	90.51	UniRef100_B9GQ40 Lysine/histidine transporter n=1 Tax=Populus trichocarpa RepID=B9GQ40_POPTR	0	97.43	AT1G47670.1 | Symbols: | Transmembrane amino acid transporter family protein | chr1:17536834-17539486 REVERSE LENGTH=519	0	99.6	GO:0006865 GO:0010075	amino acid transport; regulation of meristem growth	GO:0015171	amino acid transmembrane transporter activity	GO:0005886 GO:0016020	plasma membrane; membrane	PF01490	Transmembrane amino acid transporter protein	PTHR22950	AMINO ACID TRANSPORTER	KOG1303	Amino_acid_transporters	NA	NA	NA	NA
Glyma06g02220	108	UniRef100_I1JSX6 Uncharacterized protein n=1 Tax=Glycine max RepID=I1JSX6_SOYBN	2e-67	99.07	UniRef100_Q9LMV5 F5M15.20 n=1 Tax=Arabidopsis thaliana RepID=Q9LMV5_ARATH	2e-06	21.3	AT1G20460.1 | Symbols: | unknown protein; BEST Arabidopsis thaliana protein match is: unknown protein (TAIR:AT1G76185.1); Has 37 Blast hits to 37 proteins in 11 species: Archae - 0; Bacteria - 0; Metazoa - 0; Fungi - 0; Plants - 37; Viruses - 0; Other Eukaryotes - 0 (source: NCBI BLink). | chr1:7091505-7092993 FORWARD LENGTH=106	2e-50	99.07	GO:0008150	biological process	GO:0003674	molecular function	GO:0005739	mitochondrion	NA	NA	NA	NA	NA	NA	NA	NA	NA	NA
Glyma06g02230	110	UniRef100_I1K7F3 Uncharacterized protein n=2 Tax=Glycine max RepID=I1K7F3_SOYBN	3e-72	99.09	UniRef100_Q9LMV4 F5M15.23 n=1 Tax=Arabidopsis thaliana RepID=Q9LMV4_ARATH	3e-14	51.82	AT1G20430.1 | Symbols: | unknown protein; Has 29 Blast hits to 29 proteins in 10 species: Archae - 0; Bacteria - 0; Metazoa - 0; Fungi - 0; Plants - 29; Viruses - 0; Other Eukaryotes - 0 (source: NCBI BLink). | chr1:7083471-7083821 REVERSE LENGTH=116	1e-31	78.18	GO:0008150	biological process	GO:0003674	molecular function	GO:0005739 GO:0009507	mitochondrion; chloroplast	NA	NA	NA	NA	NA	NA	NA	NA	NA	NA
Glyma06g02240	548	UniRef100_I1K7F4 Uncharacterized protein n=1 Tax=Glycine max RepID=I1K7F4_SOYBN	0	99.82	UniRef100_B9R8I7 Multicopper oxidase, putative n=1 Tax=Ricinus communis RepID=B9R8I7_RICCO	0	99.82	AT1G76160.1 | Symbols: sks5 | SKU5 similar 5 | chr1:28578211-28581020 REVERSE LENGTH=541	0	99.09	GO:0016126 GO:0052541 GO:0052546 GO:0055114	sterol biosynthetic process; plant-type cell wall cellulose metabolic process; cell wall pectin metabolic process; oxidation-reduction process	GO:0005507 GO:0016491	copper ion binding; oxidoreductase activity	GO:0005576 GO:0005618 GO:0009505 GO:0009506 GO:0048046	extracellular region; cell wall; plant-type cell wall; plasmodesma; apoplast	PF00394 PF07731 PF07732	Multicopper oxidase; Multicopper oxidase; Multicopper oxidase	PTHR11709 PTHR11709:SF11	MULTI-COPPER OXIDASE; MULTICOPPER OXIDASE-RELATED	KOG1263	Multicopper_oxidases	NA	NA	NA	NA
Glyma06g02250	309	UniRef100_I1K7F5 Uncharacterized protein n=1 Tax=Glycine max RepID=I1K7F5_SOYBN	0	99.68	UniRef100_B9R8I2 Estradiol 17 beta-dehydrogenase, putative n=1 Tax=Ricinus communis RepID=B9R8I2_RICCO	5e-175	99.35	AT1G76150.1 | Symbols: ECH2, ATECH2 | enoyl-CoA hydratase 2 | chr1:28575236-28577637 REVERSE LENGTH=309	3e-167	99.03	GO:0006635 GO:0007031 GO:0008152 GO:0009407 GO:0010260 GO:0033542 GO:0043161 GO:0051788 GO:0080129	fatty acid beta-oxidation; peroxisome organization; metabolic process; toxin catabolic process; organ senescence; fatty acid beta-oxidation, unsaturated, even number; proteasomal ubiquitin-dependent protein catabolic process; response to misfolded protein; proteasome core complex assembly	GO:0016491 GO:0080023	oxidoreductase activity; 3R-hydroxyacyl-CoA dehydratase activity	GO:0005777	peroxisome	PF01575	MaoC like domain	PTHR13078 PTHR13078:SF5	FAMILY NOT NAMED; SUBFAMILY NOT NAMED	KOG1206	Peroxisomal_multifunctional_beta-oxidation_protein_and_related_enzymes	NA	NA	NA	NA
Glyma06g02270	68	NA	NA	NA	NA	NA	NA	NA	NA	NA	NA	NA	NA	NA	NA	NA	NA	NA	NA	NA	NA	NA	NA	NA	NA	NA
Glyma06g02290	435	UniRef100_Q70MR5 Ornithine decarboxylase n=1 Tax=Glycine max RepID=Q70MR5_SOYBN	0	99.77	UniRef100_Q70MR5 Ornithine decarboxylase n=1 Tax=Glycine max RepID=Q70MR5_SOYBN	0	99.77	AT5G11880.1 | Symbols: | Pyridoxal-dependent decarboxylase family protein | chr5:3827806-3829942 REVERSE LENGTH=489	7e-13	75.17	GO:0009089	lysine biosynthetic process via diaminopimelate	GO:0003824 GO:0008836	catalytic activity; diaminopimelate decarboxylase activity	GO:0005829 GO:0009507 GO:0009570	cytosol; chloroplast; chloroplast stroma	PF00278 PF02784	Pyridoxal-dependent decarboxylase, C-terminal sheet domain; Pyridoxal-dependent decarboxylase, pyridoxal binding domain	PTHR11482 PTHR11482:SF29	ARGININE/DIAMINOPIMELATE/ORNITHINE DECARBOXYLASE; SUBFAMILY NOT NAMED	KOG0622	Ornithine_decarboxylase	NA	NA	NA	NA
Glyma06g02300	168	UniRef100_C6SVR0 Uncharacterized protein n=1 Tax=Glycine max RepID=C6SVR0_SOYBN	4e-114	99.4	UniRef100_B9R8G0 Plastocyanin A, chloroplast, putative n=1 Tax=Ricinus communis RepID=B9R8G0_RICCO	3e-88	99.4	AT1G76100.1 | Symbols: PETE1 | plastocyanin 1 | chr1:28554217-28554732 REVERSE LENGTH=171	7e-74	99.4	GO:0009773 GO:0019344 GO:0019684 GO:0030003 GO:0035304 GO:0070838	photosynthetic electron transport in photosystem I; cysteine biosynthetic process; photosynthesis, light reaction; cellular cation homeostasis; regulation of protein dephosphorylation; divalent metal ion transport	GO:0005507 GO:0009055	copper ion binding; electron carrier activity	GO:0009507 GO:0009543 GO:0009579 GO:0031977	chloroplast; chloroplast thylakoid lumen; thylakoid; thylakoid lumen	PF00127	Copper binding proteins, plastocyanin/azurin family	NA	NA	NA	NA	NA	NA	K02638	plastocyanin
Glyma06g02310	848	UniRef100_UPI000233977A UPI000233977A related cluster n=1 Tax=unknown RepID=UPI000233977A	0	99.88	UniRef100_I1K7F8 Phospholipase D n=1 Tax=Glycine max RepID=I1K7F8_SOYBN	0	99.88	AT4G35790.2 | Symbols: ATPLDDELTA, PLDDELTA | phospholipase D delta | chr4:16955774-16959875 REVERSE LENGTH=857	0	99.29	GO:0009409 GO:0009789 GO:0012501 GO:0046473 GO:0090333	response to cold; positive regulation of abscisic acid mediated signaling pathway; programmed cell death; phosphatidic acid metabolic process; regulation of stomatal closure	GO:0003824 GO:0004630 GO:0005509	catalytic activity; phospholipase D activity; calcium ion binding	GO:0005773 GO:0005886 GO:0009506 GO:0015630 GO:0016020	vacuole; plasma membrane; plasmodesma; microtubule cytoskeleton; membrane	PF00614 PF00168 PF12357	Phospholipase D Active site motif; C2 domain; Phospholipase D C terminal	PTHR18896 PTHR18896:SF13	PHOSPHOLIPASE D; PHOSPHOLIPASE D DELTA	KOG1329	Phospholipase_D1	NA	NA	NA	NA
Glyma06g02320	433	UniRef100_UPI000233977B UPI000233977B related cluster n=1 Tax=unknown RepID=UPI000233977B	0	99.77	UniRef100_G7J5X3 Hippocampus abundant transcript-like protein n=1 Tax=Medicago truncatula RepID=G7J5X3_MEDTR	0	99.77	AT2G16990.2 | Symbols: | Major facilitator superfamily protein | chr2:7383194-7387783 FORWARD LENGTH=456	2e-136	99.54	GO:0055085	transmembrane transport	GO:0008493	tetracycline transporter activity	GO:0016021	integral to membrane	PF07690	Major Facilitator Superfamily	PTHR24003 PTHR24003:SF15	MAJOR FACILITATOR SUPERFAMILY DOMAIN-CONTAINING PR;	KOG2816	Predicted_transporter_ADD1_(major_facilitator_superfamily)	NA	NA	NA	NA
Glyma06g02330	364	UniRef100_I1K7G0 Uncharacterized protein n=1 Tax=Glycine max RepID=I1K7G0_SOYBN	0	99.73	UniRef100_D2D5G4 Sterol 24-C methyltransferase 2-2 n=1 Tax=Glycine max RepID=D2D5G4_SOYBN	0	99.73	AT1G20330.1 | Symbols: SMT2, CVP1, FRL1 | sterol methyltransferase 2 | chr1:7038968-7040053 REVERSE LENGTH=361	0	99.18	GO:0006007 GO:0006084 GO:0006694 GO:0007389 GO:0008152 GO:0009825 GO:0010051 GO:0016126 GO:0016132 GO:0019288 GO:0032876	glucose catabolic process; acetyl-CoA metabolic process; steroid biosynthetic process; pattern specification process; metabolic process; multidimensional cell growth; xylem and phloem pattern formation; sterol biosynthetic process; brassinosteroid biosynthetic process; isopentenyl diphosphate biosynthetic process, mevalonate-independent pathway; negative regulation of DNA endoreduplication	GO:0008168 GO:0008757	methyltransferase activity; S-adenosylmethionine-dependent methyltransferase activity	GO:0005783 GO:0005794	endoplasmic reticulum; Golgi apparatus	PF08241 PF08498	Methyltransferase domain; Sterol methyltransferase C-terminal	PTHR10108 PTHR10108:SF21	METHYLTRANSFERASE; S-ADENOSYL-L-METHIONINE:DELTA24-STEROL-C-METHYLTRANSFERASE	KOG1269	SAM-dependent_methyltransferases	2.1.1.143	24-methylenesterol_C-methyltransferase	K08242	24-methylenesterol_C-methyltransferase_[EC:2.1.1.143]
Glyma06g02340	266	UniRef100_I1K7G1 Uncharacterized protein n=1 Tax=Glycine max RepID=I1K7G1_SOYBN	0	97.37	UniRef100_Q8S901 Syringolide-induced protein 14-1-1 n=1 Tax=Glycine max RepID=Q8S901_SOYBN	5e-129	97.37	AT1G76070.1 | Symbols: | unknown protein; FUNCTIONS IN: molecular_function unknown; INVOLVED IN: biological_process unknown; LOCATED IN: plasma membrane; EXPRESSED IN: 8 plant structures; EXPRESSED DURING: LP.04 four leaves visible, 4 anthesis, petal differentiation and expansion stage; BEST Arabidopsis thaliana protein match is: unknown protein (TAIR:AT1G20310.1); Has 66 Blast hits to 66 protein…	1e-31	92.86	GO:0008150 GO:0010200 GO:0050832	biological process; response to chitin; defense response to fungus	GO:0003674	molecular function	GO:0005634 GO:0005886	nucleus; plasma membrane	NA	NA	NA	NA	NA	NA	NA	NA	NA	NA
Glyma06g02360	291	UniRef100_I1K7G3 Uncharacterized protein n=1 Tax=Glycine max RepID=I1K7G3_SOYBN	0	99.66	UniRef100_G7J5W0 Prolyl 4-hydroxylase alpha-2 subunit n=2 Tax=Medicago truncatula RepID=G7J5W0_MEDTR	9e-171	99.66	AT1G20270.1 | Symbols: | 2-oxoglutarate (2OG) and Fe(II)-dependent oxygenase superfamily protein | chr1:7021383-7022923 REVERSE LENGTH=287	1e-163	98.63	GO:0018401 GO:0055114	peptidyl-proline hydroxylation to 4-hydroxy-L-proline; oxidation-reduction process	GO:0005506 GO:0016491 GO:0016705 GO:0016706 GO:0031418	iron ion binding; oxidoreductase activity; oxidoreductase activity, acting on paired donors, with incorporation or reduction of molecular oxygen; oxidoreductase activity, acting on paired donors, with incorporation or reduction of molecular oxygen, 2-oxoglutarate as one donor, and incorporation of one atom each of oxygen into both donors; L-ascorbic acid binding	GO:0005739 GO:0005768 GO:0005794 GO:0005802	mitochondrion; endosome; Golgi apparatus; trans-Golgi network	PF03171	2OG-Fe(II) oxygenase superfamily	PTHR10869	PROLYL 4-HYDROXYLASE ALPHA SUBUNIT	KOG1591	Prolyl_4-hydroxylase_alpha_subunit	1.14.11.2	Procollagen-proline,2-oxoglutarate-4-dioxygenase	K00472	prolyl_4-hydroxylase_[EC:1.14.11.2]
Glyma06g02380	435	UniRef100_I1K7G6 Uncharacterized protein n=1 Tax=Glycine max RepID=I1K7G6_SOYBN	0	99.77	UniRef100_G7J5V1 Nucleoredoxin n=1 Tax=Medicago truncatula RepID=G7J5V1_MEDTR	0	98.16	AT1G60420.1 | Symbols: | DC1 domain-containing protein | chr1:22261978-22264243 FORWARD LENGTH=578	8e-95	94.71	GO:0009860 GO:0010183 GO:0045454 GO:0046686 GO:0055114 GO:0080092	pollen tube growth; pollen tube guidance; cell redox homeostasis; response to cadmium ion; oxidation-reduction process; regulation of pollen tube growth	GO:0016209 GO:0016491 GO:0047134	antioxidant activity; oxidoreductase activity; protein-disulfide reductase activity	GO:0005829	cytosol	PF00578	AhpC/TSA family	PTHR13871 PTHR13871:SF2	THIOREDOXIN; THIOREDOXIN - RELATED	KOG2501	Thioredoxin,_nucleoredoxin_and_related_proteins	NA	NA	NA	NA
Glyma06g02390	131	UniRef100_I1K7G8 Uncharacterized protein n=1 Tax=Glycine max RepID=I1K7G8_SOYBN	5e-90	99.24	UniRef100_G7J5U8 RING-H2 finger protein ATL5J n=1 Tax=Medicago truncatula RepID=G7J5U8_MEDTR	1e-61	99.24	AT5G42200.1 | Symbols: | RING/U-box superfamily protein | chr5:16860523-16861014 FORWARD LENGTH=163	2e-50	99.24	GO:0016567	protein ubiquitination	GO:0004842 GO:0008270	ubiquitin-protein ligase activity; zinc ion binding	NA	NA	PF00097	Zinc finger, C3HC4 type (RING finger)	PTHR22764	RING FINGER PROTEIN 11 (SID 1669) (NEDD4 WW DOMAIN-BINDING PROTEIN 2).	NA	NA	NA	NA	NA	NA
Glyma06g02400	213	UniRef100_I1K7G9 Uncharacterized protein n=1 Tax=Glycine max RepID=I1K7G9_SOYBN	1e-155	99.53	UniRef100_Q9LNU5 T20H2.2 protein n=2 Tax=Arabidopsis thaliana RepID=Q9LNU5_ARATH	2e-17	51.64	AT1G20225.1 | Symbols: | Thioredoxin superfamily protein | chr1:7007966-7009318 REVERSE LENGTH=233	3e-21	54.93	GO:0008150	biological process	GO:0003674	molecular function	GO:0005773 GO:0005829	vacuole; cytosol	NA	NA	NA	NA	NA	NA	NA	NA	NA	NA
Glyma06g02410	488	UniRef100_I1K7H0 Uncharacterized protein n=3 Tax=Glycine max RepID=I1K7H0_SOYBN	0	99.8	UniRef100_G7J5U6 26S proteasome non-ATPase regulatory subunit n=1 Tax=Medicago truncatula RepID=G7J5U6_MEDTR	0	99.8	AT1G20200.1 | Symbols: EMB2719, HAP15 | PAM domain (PCI/PINT associated module) protein | chr1:7001409-7004154 REVERSE LENGTH=488	0	99.8	GO:0006511 GO:0006635 GO:0009407 GO:0009793 GO:0042023 GO:0042176 GO:0043161 GO:0043248 GO:0051510 GO:0051788 GO:0080129	ubiquitin-dependent protein catabolic process; fatty acid beta-oxidation; toxin catabolic process; embryo development ending in seed dormancy; DNA endoreduplication; regulation of protein catabolic process; proteasomal ubiquitin-dependent protein catabolic process; proteasome assembly; regulation of unidimensional cell growth; response to misfolded protein; proteasome core complex assembly	GO:0030234	enzyme regulator activity	GO:0000502 GO:0005634 GO:0005829 GO:0005886 GO:0008541 GO:0009506	proteasome complex; nucleus; cytosol; plasma membrane; proteasome regulatory particle, lid subcomplex; plasmodesma	PF08375 PF01399	Proteasome regulatory subunit C-terminal; PCI domain	PTHR10758 PTHR10758:SF2	26S PROTEASOME REGULATORY SUBUNIT S3; 26S PROTEASOME NON-ATPASE REGULATORY SUBUNIT 3	KOG2581	26S_proteasome_regulatory_complex,_subunit_RPN3/PSMD3	NA	NA	K03033	26S_proteasome_regulatory_subunit_N3
Glyma06g02420	256	UniRef100_I1K7H3 Uncharacterized protein n=1 Tax=Glycine max RepID=I1K7H3_SOYBN	0	99.61	UniRef100_Q8GZD3 Expansin n=1 Tax=Glycine max RepID=Q8GZD3_SOYBN	6e-160	99.61	AT1G20190.1 | Symbols: ATEXPA11, EXP11, ATEXP11, ATHEXP ALPHA 1.14, EXPA11 | expansin 11 | chr1:6998762-6999710 REVERSE LENGTH=252	2e-143	92.58	GO:0009664 GO:0009826 GO:0009828 GO:0009831	plant-type cell wall organization; unidimensional cell growth; plant-type cell wall loosening; plant-type cell wall modification involved in multidimensional cell growth	NA	NA	GO:0005576 GO:0005618	extracellular region; cell wall	PF01357 PF03330	Pollen allergen; Rare lipoprotein A (RlpA)-like double-psi beta-barrel	NA	NA	NA	NA	NA	NA	NA	NA
Glyma06g02430	253	UniRef100_I1K7H4 Uncharacterized protein (Fragment) n=1 Tax=Glycine max RepID=I1K7H4_SOYBN	0	97.63	UniRef100_Q8GZD3 Expansin n=1 Tax=Glycine max RepID=Q8GZD3_SOYBN	2e-141	99.6	AT1G20190.1 | Symbols: ATEXPA11, EXP11, ATEXP11, ATHEXP ALPHA 1.14, EXPA11 | expansin 11 | chr1:6998762-6999710 REVERSE LENGTH=252	1e-126	92.09	GO:0009664 GO:0009826 GO:0009828 GO:0009831	plant-type cell wall organization; unidimensional cell growth; plant-type cell wall loosening; plant-type cell wall modification involved in multidimensional cell growth	NA	NA	GO:0005576 GO:0005618	extracellular region; cell wall	PF01357 PF03330	Pollen allergen; Rare lipoprotein A (RlpA)-like double-psi beta-barrel	NA	NA	NA	NA	NA	NA	NA	NA
Glyma06g02440	218	UniRef100_I1K7H5 Uncharacterized protein n=1 Tax=Glycine max RepID=I1K7H5_SOYBN	1e-158	99.54	UniRef100_E4MXA2 mRNA, clone: RTFL01-21-G24 n=1 Tax=Eutrema halophilum RepID=E4MXA2_THEHA	9e-91	88.99	AT1G75980.1 | Symbols: | Single hybrid motif superfamily protein | chr1:28522936-28524302 REVERSE LENGTH=225	2e-94	96.79	GO:0006546	glycine catabolic process	GO:0003674	molecular function	GO:0005634 GO:0005960	nucleus; glycine cleavage complex	PF01597	Glycine cleavage H-protein	PTHR13651	UNCHARACTERIZED	KOG3266	Predicted_glycine_cleavage_system_H_protein	NA	NA	NA	NA
Glyma06g02460	512	UniRef100_UPI00023398D6 UPI00023398D6 related cluster n=1 Tax=unknown RepID=UPI00023398D6	0	99.8	UniRef100_G7J5C2 NAD(P)H-quinone oxidoreductase chain n=1 Tax=Medicago truncatula RepID=G7J5C2_MEDTR	1e-116	81.45	AT4G35890.1 | Symbols: | winged-helix DNA-binding transcription factor family protein | chr4:16997433-17000410 FORWARD LENGTH=523	1e-48	96.09	GO:0010150 GO:0048523	leaf senescence; negative regulation of cellular process	NA	NA	GO:0005737 GO:0009507	cytoplasm; chloroplast	PF05383	La domain	PTHR22792 PTHR22792:SF23	LUPUS LA RIBONUCLEOPROTEIN; SUBFAMILY NOT NAMED	NA	NA	NA	NA	NA	NA
Glyma06g02470	229	UniRef100_A4ZGR4 Transcription factor bZIP47 (Fragment) n=1 Tax=Glycine max RepID=A4ZGR4_SOYBN	6e-117	75.11	UniRef100_A4ZGR4 Transcription factor bZIP47 (Fragment) n=1 Tax=Glycine max RepID=A4ZGR4_SOYBN	6e-117	75.11	AT4G35900.1 | Symbols: FD, FD-1, atbzip14 | Basic-leucine zipper (bZIP) transcription factor family protein | chr4:17004746-17005952 FORWARD LENGTH=285	5e-15	31.44	GO:0006355 GO:0009410 GO:0009648 GO:0009909 GO:0009911 GO:0030968 GO:0045893 GO:0048573	regulation of transcription, DNA-dependent; response to xenobiotic stimulus; photoperiodism; regulation of flower development; positive regulation of flower development; endoplasmic reticulum unfolded protein response; positive regulation of transcription, DNA-dependent; photoperiodism, flowering	GO:0003677 GO:0003700 GO:0005515 GO:0043565 GO:0046983	DNA binding; sequence-specific DNA binding transcription factor activity; protein binding; sequence-specific DNA binding; protein dimerization activity	GO:0005634	nucleus	PF00170	bZIP transcription factor	PTHR22952 PTHR22952:SF45	CAMP-RESPONSE ELEMENT BINDING PROTEIN-RELATED; SUBFAMILY NOT NAMED	NA	NA	NA	NA	NA	NA
Glyma06g02500	771	UniRef100_Q9LDM8 Putative pre-pro-subtilisin n=1 Tax=Glycine max RepID=Q9LDM8_SOYBN	0	99.87	UniRef100_Q93WQ0 Subtilisin-type protease n=1 Tax=Glycine max RepID=Q93WQ0_SOYBN	0	95.59	AT1G20160.1 | Symbols: ATSBT5.2 | Subtilisin-like serine endopeptidase family protein | chr1:6990852-6993854 REVERSE LENGTH=769	0	99.74	GO:0006508 GO:0008152 GO:0043086	proteolysis; metabolic process; negative regulation of catalytic activity	GO:0004252 GO:0042802	serine-type endopeptidase activity; identical protein binding	GO:0005576 GO:0005618 GO:0048046	extracellular region; cell wall; apoplast	PF05922 PF00082 PF02225	Peptidase inhibitor I9; Subtilase family; PA domain	PTHR10795 PTHR10795:SF17	SUBTILISIN/KEXIN-RELATED SERINE PROTEASE; gb def: possible protease [sinorhizobium meliloti]	NA	NA	NA	NA	NA	NA
Glyma06g02520	378	UniRef100_I1K7I2 Uncharacterized protein n=1 Tax=Glycine max RepID=I1K7I2_SOYBN	0	94.44	UniRef100_G7I7T3 GDSL esterase/lipase n=1 Tax=Medicago truncatula RepID=G7I7T3_MEDTR	3e-144	90.48	AT5G42170.1 | Symbols: | SGNH hydrolase-type esterase superfamily protein | chr5:16848786-16851707 FORWARD LENGTH=369	2e-135	87.83	GO:0006629	lipid metabolic process	GO:0004091 GO:0016788	carboxylesterase activity; hydrolase activity, acting on ester bonds	GO:0005576	extracellular region	PF00657	GDSL-like Lipase/Acylhydrolase	PTHR22835 PTHR22835:SF39	ZINC FINGER FYVE DOMAIN CONTAINING PROTEIN; LATERAL SIGNALING TARGET PROTEIN 2	NA	NA	NA	NA	NA	NA
Glyma06g02530	365	UniRef100_I1JT14 Uncharacterized protein n=1 Tax=Glycine max RepID=I1JT14_SOYBN	0	99.73	UniRef100_G7I7T3 GDSL esterase/lipase n=1 Tax=Medicago truncatula RepID=G7I7T3_MEDTR	0	96.16	AT1G75900.1 | Symbols: | GDSL-like Lipase/Acylhydrolase superfamily protein | chr1:28499179-28500943 FORWARD LENGTH=364	3e-156	94.25	GO:0006629 GO:0019761 GO:0019953	lipid metabolic process; glucosinolate biosynthetic process; sexual reproduction	GO:0004091 GO:0016298 GO:0016746 GO:0016788	carboxylesterase activity; lipase activity; transferase activity, transferring acyl groups; hydrolase activity, acting on ester bonds	GO:0005576	extracellular region	PF00657	GDSL-like Lipase/Acylhydrolase	PTHR22835 PTHR22835:SF39	ZINC FINGER FYVE DOMAIN CONTAINING PROTEIN; LATERAL SIGNALING TARGET PROTEIN 2	NA	NA	NA	NA	NA	NA
Glyma06g02540	287	UniRef100_I1K7I4 Uncharacterized protein n=1 Tax=Glycine max RepID=I1K7I4_SOYBN	0	93.73	UniRef100_G7I7S5 GDSL esterase/lipase n=1 Tax=Medicago truncatula RepID=G7I7S5_MEDTR	3e-132	83.28	AT1G75890.2 | Symbols: | GDSL-like Lipase/Acylhydrolase superfamily protein | chr1:28493051-28495047 FORWARD LENGTH=366	2e-91	82.93	GO:0006629 GO:0019953	lipid metabolic process; sexual reproduction	GO:0004091 GO:0016298 GO:0016746 GO:0016788	carboxylesterase activity; lipase activity; transferase activity, transferring acyl groups; hydrolase activity, acting on ester bonds	GO:0005576	extracellular region	PF00657	GDSL-like Lipase/Acylhydrolase	PTHR22835 PTHR22835:SF39	ZINC FINGER FYVE DOMAIN CONTAINING PROTEIN; LATERAL SIGNALING TARGET PROTEIN 2	NA	NA	NA	NA	NA	NA
Glyma06g02550	549	UniRef100_I1K7I5 Uncharacterized protein n=1 Tax=Glycine max RepID=I1K7I5_SOYBN	0	99.82	UniRef100_G7J5A0 Lateral signaling target protein-like protein n=2 Tax=Medicago truncatula RepID=G7J5A0_MEDTR	0	99.82	AT1G20110.1 | Symbols: | RING/FYVE/PHD zinc finger superfamily protein | chr1:6971554-6974578 FORWARD LENGTH=601	0	99.82	GO:0006623 GO:0006944 GO:0007165 GO:0016192 GO:0016197	protein targeting to vacuole; cellular membrane fusion; signal transduction; vesicle-mediated transport; endosomal transport	GO:0035091 GO:0046872	phosphatidylinositol binding; metal ion binding	GO:0005634	nucleus	PF01363	FYVE zinc finger	PTHR22835 PTHR22835:SF80	ZINC FINGER FYVE DOMAIN CONTAINING PROTEIN; SUBFAMILY NOT NAMED	NA	NA	NA	NA	NA	NA
Glyma06g02560	165	UniRef100_UPI00023398D8 UPI00023398D8 related cluster n=1 Tax=unknown RepID=UPI00023398D8	8e-51	99.39	UniRef100_G7J598 Prostaglandin E synthase n=1 Tax=Medicago truncatula RepID=G7J598_MEDTR	3e-38	97.58	AT5G42150.1 | Symbols: | Glutathione S-transferase family protein | chr5:16846247-16847909 FORWARD LENGTH=315	1e-25	98.18	GO:0006626 GO:0009407 GO:0010583 GO:0045454	protein targeting to mitochondrion; toxin catabolic process; response to cyclopentenone; cell redox homeostasis	GO:0009055 GO:0015035	electron carrier activity; protein disulfide oxidoreductase activity	GO:0005739	mitochondrion	NA	NA	PTHR12782 PTHR12782:SF5	MICROSOMAL PROSTAGLANDIN E SYNTHASE-2; SUBFAMILY NOT NAMED	NA	NA	NA	NA	NA	NA
Glyma06g02580	198	UniRef100_C6SX18 Uncharacterized protein n=1 Tax=Glycine max RepID=C6SX18_SOYBN	7e-143	99.49	UniRef100_Q9SXT7 Rac-type small GTP-binding protein n=1 Tax=Cicer arietinum RepID=Q9SXT7_CICAR	6e-136	99.49	AT4G35020.3 | Symbols: RAC3 | RAC-like 3 | chr4:16673176-16674540 FORWARD LENGTH=198	7e-127	99.49	GO:0000226 GO:0000394 GO:0006184 GO:0007015 GO:0007165 GO:0007264 GO:0009086 GO:0009860 GO:0015031	microtubule cytoskeleton organization; RNA splicing, via endonucleolytic cleavage and ligation; GTP catabolic process; actin filament organization; signal transduction; small GTPase mediated signal transduction; methionine biosynthetic process; pollen tube growth; protein transport	GO:0003924 GO:0005525	GTPase activity; GTP binding	GO:0005622 GO:0005634 GO:0005730 GO:0005737 GO:0005819 GO:0005886 GO:0016020 GO:0030427	intracellular; nucleus; nucleolus; cytoplasm; spindle; plasma membrane; membrane; site of polarized growth	PF00071	Ras family	PTHR24072 PTHR24072:SF353	FAMILY NOT NAMED;	KOG0393	Ras-related_small_GTPase,_Rho_type	NA	NA	K07975	Rho_family,_other
Glyma06g02600	958	UniRef100_UPI00023398D9 UPI00023398D9 related cluster n=1 Tax=unknown RepID=UPI00023398D9	0	99.9	UniRef100_Q9LNT1 T20H2.17 protein n=1 Tax=Arabidopsis thaliana RepID=Q9LNT1_ARATH	8e-155	59.81	AT1G20060.1 | Symbols: | ATP binding microtubule motor family protein | chr1:6950723-6956293 REVERSE LENGTH=970	4e-143	59.81	GO:0007018	microtubule-based movement	GO:0003777 GO:0005524	microtubule motor activity; ATP binding	GO:0005634	nucleus	PF00225	Kinesin motor domain	PTHR24115 PTHR24115:SF272	FAMILY NOT NAMED;	KOG0242	Kinesin-like_protein	NA	NA	NA	NA
Glyma06g02610	1003	UniRef100_I1K7I9 Uncharacterized protein n=1 Tax=Glycine max RepID=I1K7I9_SOYBN	0	99.9	UniRef100_B9RB66 DNA binding protein, putative n=1 Tax=Ricinus communis RepID=B9RB66_RICCO	1e-14	48.45	AT4G24200.1 | Symbols: | Transcription elongation factor (TFIIS) family protein | chr4:12556927-12559929 REVERSE LENGTH=1000	5e-52	15.95	GO:0006351	transcription, DNA-dependent	GO:0003677	DNA binding	GO:0005634 GO:0005739	nucleus; mitochondrion	NA	NA	NA	NA	NA	NA	NA	NA	NA	NA
Glyma06g02620	110	UniRef100_I1K7J1 Uncharacterized protein n=1 Tax=Glycine max RepID=I1K7J1_SOYBN	3e-73	99.09	UniRef100_Q9ZQY8 Small hydrophobic protein n=1 Tax=Arabidopsis thaliana RepID=Q9ZQY8_ARATH	2e-12	60	AT1G75810.1 | Symbols: | unknown protein; FUNCTIONS IN: molecular_function unknown; INVOLVED IN: biological_process unknown; LOCATED IN: endomembrane system; EXPRESSED IN: 24 plant structures; EXPRESSED DURING: 15 growth stages; Has 13 Blast hits to 13 proteins in 5 species: Archae - 0; Bacteria - 0; Metazoa - 0; Fungi - 0; Plants - 13; Viruses - 0; Other Eukaryotes - 0 (source: NCBI BLink). | ch…	2e-34	95.45	GO:0008150	biological process	GO:0003674	molecular function	GO:0005576	extracellular region	NA	NA	NA	NA	NA	NA	NA	NA	NA	NA
Glyma06g02630	329	UniRef100_I1K7J2 Uncharacterized protein (Fragment) n=2 Tax=Glycine max RepID=I1K7J2_SOYBN	0	85.71	UniRef100_G7I7Q3 Thaumatin-like protein n=1 Tax=Medicago truncatula RepID=G7I7Q3_MEDTR	5e-170	99.39	AT1G75800.1 | Symbols: | Pathogenesis-related thaumatin superfamily protein | chr1:28458889-28460447 FORWARD LENGTH=330	6e-134	79.33	GO:0051707	response to other organism	GO:0003674	molecular function	GO:0005576	extracellular region	PF00314	Thaumatin family	NA	NA	NA	NA	NA	NA	NA	NA
Glyma06g02640	606	UniRef100_UPI00023398DB UPI00023398DB related cluster n=1 Tax=unknown RepID=UPI00023398DB	0	99.83	UniRef100_Q9SA91 T5I8.21 protein n=1 Tax=Arabidopsis thaliana RepID=Q9SA91_ARATH	2e-146	70.3	AT1G30755.1 | Symbols: | Protein of unknown function (DUF668) | chr1:10905991-10908773 REVERSE LENGTH=615	0	99.83	GO:0008150	biological process	NA	NA	GO:0005634	nucleus	PF11961 PF05003	Domain of unknown function (DUF3475); Protein of unknown function (DUF668)	NA	NA	NA	NA	NA	NA	NA	NA
Glyma06g02650	449	UniRef100_I1K7J4 Uncharacterized protein n=1 Tax=Glycine max RepID=I1K7J4_SOYBN	0	99.78	UniRef100_B9R897 Tubulin beta chain, putative n=1 Tax=Ricinus communis RepID=B9R897_RICCO	0	99.33	AT1G75780.1 | Symbols: TUB1 | tubulin beta-1 chain | chr1:28451378-28453602 REVERSE LENGTH=447	0	96.21	GO:0000271 GO:0006094 GO:0006184 GO:0007010 GO:0007017 GO:0007018 GO:0009416 GO:0009825 GO:0009826 GO:0009932 GO:0010498 GO:0010817 GO:0043481 GO:0048767 GO:0051258 GO:0071555	polysaccharide biosynthetic process; gluconeogenesis; GTP catabolic process; cytoskeleton organization; microtubule-based process; microtubule-based movement; response to light stimulus; multidimensional cell growth; unidimensional cell growth; cell tip growth; proteasomal protein catabolic process; regulation of hormone levels; anthocyanin accumulation in tissues in response to UV light; root ha…	GO:0003924 GO:0005198 GO:0005525	GTPase activity; structural molecule activity; GTP binding	GO:0005737 GO:0005773 GO:0005874 GO:0043234	cytoplasm; vacuole; microtubule; protein complex	PF03953 PF00091	Tubulin C-terminal domain; Tubulin/FtsZ family, GTPase domain	PTHR11588	TUBULIN	KOG1375	Beta_tubulin	NA	NA	K07375	tubulin_beta
Glyma06g02670	237	UniRef100_I1K7J5 Uncharacterized protein n=1 Tax=Glycine max RepID=I1K7J5_SOYBN	5e-158	99.58	UniRef100_Q9LNS7 T20H2.23 protein n=2 Tax=Arabidopsis thaliana RepID=Q9LNS7_ARATH	3e-31	43.88	AT1G19990.1 | Symbols: | unknown protein; FUNCTIONS IN: molecular_function unknown; INVOLVED IN: biological_process unknown; LOCATED IN: cellular_component unknown; EXPRESSED IN: cultured cell; BEST Arabidopsis thaliana protein match is: unknown protein (TAIR:AT5G11600.1); Has 11256 Blast hits to 7192 proteins in 541 species: Archae - 6; Bacteria - 629; Metazoa - 4714; Fungi - 936; Plants - 545; …	1e-35	43.88	GO:0008150	biological process	GO:0003674	molecular function	GO:0005634	nucleus	NA	NA	NA	NA	NA	NA	NA	NA	NA	NA
Glyma06g02680	273	UniRef100_I1K7J6 Uncharacterized protein n=1 Tax=Glycine max RepID=I1K7J6_SOYBN	0	99.63	UniRef100_D7KT65 ER lumen protein retaining receptor family protein n=1 Tax=Arabidopsis lyrata subsp. lyrata RepID=D7KT65_ARALL	3e-173	99.63	AT1G75760.1 | Symbols: | ER lumen protein retaining receptor family protein | chr1:28446940-28448421 REVERSE LENGTH=272	3e-174	99.63	GO:0006007 GO:0006621 GO:0015031	glucose catabolic process; protein retention in ER lumen; protein transport	GO:0004872 GO:0046923	receptor activity; ER retention sequence binding	GO:0016021	integral to membrane	PF00810	ER lumen protein retaining receptor	PTHR10585 PTHR10585:SF10	ER LUMEN PROTEIN RETAINING RECEPTOR-RELATED; ER LUMEN PROTEIN RETAINING RECEPTOR	KOG3106	ER_lumen_protein_retaining_receptor	NA	NA	NA	NA
Glyma06g02690	101	UniRef100_I1K7J7 Uncharacterized protein n=1 Tax=Glycine max RepID=I1K7J7_SOYBN	2e-65	99.01	UniRef100_G7I774 Gibberellin-regulated protein n=1 Tax=Medicago truncatula RepID=G7I774_MEDTR	2e-49	99.01	AT1G75750.2 | Symbols: GASA1 | GAST1 protein homolog 1 | chr1:28441813-28442284 REVERSE LENGTH=97	2e-32	99.01	GO:0000271 GO:0006569 GO:0009684 GO:0009737 GO:0009739 GO:0009741 GO:0009825 GO:0009826 GO:0009932 GO:0010817 GO:0043481 GO:0048767 GO:0071555	polysaccharide biosynthetic process; tryptophan catabolic process; indoleacetic acid biosynthetic process; response to abscisic acid stimulus; response to gibberellin stimulus; response to brassinosteroid stimulus; multidimensional cell growth; unidimensional cell growth; cell tip growth; regulation of hormone levels; anthocyanin accumulation in tissues in response to UV light; root hair elongati…	GO:0003674	molecular function	GO:0005576 GO:0005618 GO:0009505	extracellular region; cell wall; plant-type cell wall	PF02704	Gibberellin regulated protein	NA	NA	NA	NA	NA	NA	NA	NA
Glyma06g02750	277	UniRef100_I1K7K3 Uncharacterized protein n=2 Tax=Glycine max RepID=I1K7K3_SOYBN	0	99.64	UniRef100_G7J4Q8 HVA22-like protein i n=1 Tax=Medicago truncatula RepID=G7J4Q8_MEDTR	7e-146	98.92	AT5G42560.1 | Symbols: | Abscisic acid-responsive (TB2/DP1, HVA22) family protein | chr5:17015573-17016969 FORWARD LENGTH=296	1e-107	98.19	GO:0007165 GO:0008150 GO:0009755	signal transduction; biological process; hormone-mediated signaling pathway	GO:0003674	molecular function	GO:0005634	nucleus	PF03134	TB2/DP1, HVA22 family	PTHR12300 PTHR12300:SF20	HVA22-LIKE PROTEINS; HVA22-LIKE PROTEIN	KOG1726	HVA22/DP1_gene_product-related_proteins	NA	NA	NA	NA
Glyma06g02760	530	UniRef100_I1K7K4 Uncharacterized protein n=1 Tax=Glycine max RepID=I1K7K4_SOYBN	0	99.81	UniRef100_G7J4Q1 Endoglucanase n=1 Tax=Medicago truncatula RepID=G7J4Q1_MEDTR	0	99.81	AT1G75680.1 | Symbols: AtGH9B7, GH9B7 | glycosyl hydrolase 9B7 | chr1:28417215-28419231 REVERSE LENGTH=525	0	99.62	GO:0000271 GO:0000272 GO:0005975 GO:0005982 GO:0006084 GO:0007389 GO:0008361 GO:0009664 GO:0009736 GO:0009825 GO:0009832 GO:0009926 GO:0009932 GO:0010015 GO:0010075 GO:0010817 GO:0016126 GO:0016132 GO:0040007 GO:0042546 GO:0043481 GO:0048653 GO:0048767 GO:0071555	polysaccharide biosynthetic process; polysaccharide catabolic process; carbohydrate metabolic process; starch metabolic process; acetyl-CoA metabolic process; pattern specification process; regulation of cell size; plant-type cell wall organization; cytokinin mediated signaling pathway; multidimensional cell growth; plant-type cell wall biogenesis; auxin polar transport; cell tip growth; root mor…	GO:0003824 GO:0004553	catalytic activity; hydrolase activity, hydrolyzing O-glycosyl compounds	GO:0005576 GO:0005886	extracellular region; plasma membrane	PF00759	Glycosyl hydrolase family 9	PTHR22298	ENDO-1,4-BETA-GLUCANASE	NA	NA	NA	NA	NA	NA
Glyma06g02770	222	UniRef100_UPI0001B8379A UPI0001B8379A related cluster n=1 Tax=unknown RepID=UPI0001B8379A	3e-162	99.55	UniRef100_G7J4P9 Carboxy-lyase n=1 Tax=Medicago truncatula RepID=G7J4P9_MEDTR	3e-148	99.55	AT2G28305.1 | Symbols: LOG1, ATLOG1 | Putative lysine decarboxylase family protein | chr2:12081186-12084307 FORWARD LENGTH=213	1e-112	90.09	GO:0008150	biological process	GO:0003674	molecular function	GO:0005634 GO:0005829	nucleus; cytosol	PF03641	Possible lysine decarboxylase	NA	NA	NA	NA	NA	NA	NA	NA
Glyma06g02790	101	UniRef100_C6SW97 Uncharacterized protein n=1 Tax=Glycine max RepID=C6SW97_SOYBN	9e-67	99.01	UniRef100_B9H0Z6 SAUR family protein n=1 Tax=Populus trichocarpa RepID=B9H0Z6_POPTR	8e-52	99.01	AT1G75580.1 | Symbols: | SAUR-like auxin-responsive protein family | chr1:28377530-28377856 FORWARD LENGTH=108	9e-52	99.01	GO:0009733	response to auxin stimulus	GO:0005516	calmodulin binding	GO:0005575	cellular component	PF02519	Auxin responsive protein	NA	NA	NA	NA	NA	NA	NA	NA
Glyma06g02800	1081	UniRef100_I1K7K6 Uncharacterized protein n=1 Tax=Glycine max RepID=I1K7K6_SOYBN	0	99.91	UniRef100_B9R869 Myosin heavy chain, striated muscle, putative n=1 Tax=Ricinus communis RepID=B9R869_RICCO	0	99.91	AT1G19835.2 | Symbols: | Plant protein of unknown function (DUF869) | chr1:6856212-6859513 REVERSE LENGTH=982	0	99.63	GO:0008150	biological process	GO:0003674	molecular function	GO:0005737 GO:0005886	cytoplasm; plasma membrane	PF05911	Plant protein of unknown function (DUF869)	NA	NA	NA	NA	NA	NA	NA	NA
Glyma06g02810	121	UniRef100_I1K7K7 Uncharacterized protein n=1 Tax=Glycine max RepID=I1K7K7_SOYBN	1e-82	99.17	UniRef100_B9H4U8 SAUR family protein n=1 Tax=Populus trichocarpa RepID=B9H4U8_POPTR	2e-54	93.39	AT1G75590.1 | Symbols: | SAUR-like auxin-responsive protein family | chr1:28383250-28383714 REVERSE LENGTH=154	3e-44	98.35	GO:0009733	response to auxin stimulus	GO:0003674	molecular function	GO:0005739	mitochondrion	PF02519	Auxin responsive protein	NA	NA	NA	NA	NA	NA	NA	NA
Glyma06g02820	129	UniRef100_I1K7K8 Uncharacterized protein n=1 Tax=Glycine max RepID=I1K7K8_SOYBN	2e-87	99.22	UniRef100_I6LNS8 Mitochondrial 39S ribosomal protein L53 n=1 Tax=Hevea brasiliensis RepID=I6LNS8_HEVBR	8e-56	92.25	AT5G39600.1 | Symbols: | CONTAINS InterPro DOMAIN/s: Ribosomal protein L53, mitochondrial (InterPro:IPR019716); Has 50 Blast hits to 50 proteins in 19 species: Archae - 0; Bacteria - 0; Metazoa - 6; Fungi - 0; Plants - 42; Viruses - 0; Other Eukaryotes - 2 (source: NCBI BLink). | chr5:15854188-15854771 REVERSE LENGTH=127	1e-68	98.45	GO:0000394 GO:0008150 GO:0009086	RNA splicing, via endonucleolytic cleavage and ligation; biological process; methionine biosynthetic process	GO:0003674	molecular function	GO:0005575	cellular component	NA	NA	NA	NA	NA	NA	NA	NA	NA	NA
Glyma06g02830	408	UniRef100_I1K7K9 Uncharacterized protein (Fragment) n=2 Tax=Glycine max RepID=I1K7K9_SOYBN	0	94.85	UniRef100_G7I2D9 Zinc finger CCCH domain-containing protein n=1 Tax=Medicago truncatula RepID=G7I2D9_MEDTR	2e-151	99.75	AT1G19860.1 | Symbols: | Zinc finger C-x8-C-x5-C-x3-H type family protein | chr1:6891654-6894400 REVERSE LENGTH=413	5e-89	99.51	GO:0008150	biological process	GO:0003676 GO:0008270	nucleic acid binding; zinc ion binding	GO:0005634	nucleus	NA	NA	PTHR23102 PTHR23102:SF17	ZINC FINGER (CLIPPER)-RELATED; ZINC FINGER (CCCH-TYPE) FAMILY PROTEIN	NA	NA	NA	NA	NA	NA
Glyma06g02850	544	UniRef100_I1K7L1 Uncharacterized protein n=1 Tax=Glycine max RepID=I1K7L1_SOYBN	0	99.82	UniRef100_B9R853 Protein RCC2, putative n=1 Tax=Ricinus communis RepID=B9R853_RICCO	0	99.82	AT1G19880.1 | Symbols: | Regulator of chromosome condensation (RCC1) family protein | chr1:6900648-6903818 REVERSE LENGTH=538	0	99.26	GO:0008150	biological process	GO:0008536	Ran GTPase binding	GO:0005634	nucleus	PF00415	Regulator of chromosome condensation (RCC1) repeat	PTHR22870 PTHR22870:SF18	REGULATOR OF CHROMOSOME CONDENSATION; UVB-RESISTANCE PROTEIN UVR8-RELATED	KOG1427	Uncharacterized_conserved_protein,_contains_RCC1_domain	NA	NA	NA	NA
Glyma06g02860	362	UniRef100_I1K7L2 Uncharacterized protein n=1 Tax=Glycine max RepID=I1K7L2_SOYBN	0	99.72	UniRef100_Q0GPE5 BZIP transcription factor bZIP11 n=1 Tax=Glycine max RepID=Q0GPE5_SOYBN	0	99.72	AT4G38900.3 | Symbols: | Basic-leucine zipper (bZIP) transcription factor family protein | chr4:18139564-18141520 REVERSE LENGTH=547	4e-52	93.92	GO:0006355 GO:0009410 GO:0030968	regulation of transcription, DNA-dependent; response to xenobiotic stimulus; endoplasmic reticulum unfolded protein response	GO:0003677 GO:0003700 GO:0043565 GO:0046983	DNA binding; sequence-specific DNA binding transcription factor activity; sequence-specific DNA binding; protein dimerization activity	GO:0005634 GO:0005829	nucleus; cytosol	NA	NA	PTHR13301	X-BOX TRANSCRIPTION FACTOR-RELATED	NA	NA	NA	NA	NA	NA
Glyma06g02880	338	UniRef100_I1K7L4 Uncharacterized protein n=1 Tax=Glycine max RepID=I1K7L4_SOYBN	0	99.7	UniRef100_G7I6G1 GAGA-binding transcriptional activator n=2 Tax=Medicago truncatula RepID=G7I6G1_MEDTR	0	99.7	AT5G42520.1 | Symbols: BPC6, BBR/BPC6, ATBPC6 | basic pentacysteine 6 | chr5:17001287-17002466 FORWARD LENGTH=342	1e-152	99.7	GO:0006355 GO:0009723	regulation of transcription, DNA-dependent; response to ethylene stimulus	GO:0003677 GO:0003700 GO:0005515 GO:0042803	DNA binding; sequence-specific DNA binding transcription factor activity; protein binding; protein homodimerization activity	GO:0005634 GO:0005730	nucleus; nucleolus	PF06217	GAGA binding protein-like family	NA	NA	NA	NA	NA	NA	NA	NA
Glyma06g02890	542	UniRef100_I1K7L5 Uncharacterized protein (Fragment) n=2 Tax=Glycine max RepID=I1K7L5_SOYBN	0	96.68	UniRef100_G7I5Z0 Galactose oxidase n=1 Tax=Medicago truncatula RepID=G7I5Z0_MEDTR	0	95.94	AT1G75620.1 | Symbols: | glyoxal oxidase-related protein | chr1:28394951-28396594 REVERSE LENGTH=547	0	98.52	GO:0008150 GO:0010413 GO:0045492	biological process; glucuronoxylan metabolic process; xylan biosynthetic process	GO:0003674	molecular function	GO:0005576	extracellular region	PF09118 PF07250	Domain of unknown function (DUF1929); Glyoxal oxidase N-terminus	NA	NA	NA	NA	NA	NA	NA	NA
Glyma06g02900	559	UniRef100_I1K7L6 Uncharacterized protein n=1 Tax=Glycine max RepID=I1K7L6_SOYBN	0	99.82	UniRef100_G9JJS5 Galactose oxidase n=1 Tax=Ziziphus jujuba RepID=G9JJS5_ZIZJJ	0	96.42	AT1G75620.1 | Symbols: | glyoxal oxidase-related protein | chr1:28394951-28396594 REVERSE LENGTH=547	0	94.45	GO:0008150 GO:0010413 GO:0045492	biological process; glucuronoxylan metabolic process; xylan biosynthetic process	GO:0003674	molecular function	GO:0005576	extracellular region	PF09118 PF07250	Domain of unknown function (DUF1929); Glyoxal oxidase N-terminus	NA	NA	NA	NA	NA	NA	NA	NA
Glyma06g02910	386	UniRef100_I1K7L7 Uncharacterized protein n=1 Tax=Glycine max RepID=I1K7L7_SOYBN	0	99.74	UniRef100_G7J4P6 Guanine nucleotide-binding protein subunit beta-like protein-like protein n=2 Tax=Medicago truncatula RepID=G7J4P6_MEDTR	0	99.48	AT4G29860.1 | Symbols: EMB2757, TAN | Transducin/WD40 repeat-like superfamily protein | chr4:14603296-14605704 REVERSE LENGTH=386	2e-176	99.22	GO:0009790 GO:0009793 GO:0048700	embryo development; embryo development ending in seed dormancy; acquisition of desiccation tolerance in seed	GO:0000166	nucleotide binding	GO:0005634 GO:0080008	nucleus; CUL4-RING ubiquitin ligase complex	PF00400	WD domain, G-beta repeat	PTHR22847 PTHR22847:SF104	WD40 REPEAT PROTEIN; OS06G0131100 PROTEIN	KOG0322	G-protein_beta_subunit-like_protein_GNB1L,_contains_WD_repeats	NA	NA	NA	NA
Glyma06g02930	1134	UniRef100_UPI00023398E5 UPI00023398E5 related cluster n=1 Tax=unknown RepID=UPI00023398E5	0	99.91	UniRef100_G7J4P1 Receptor-like protein kinase n=1 Tax=Medicago truncatula RepID=G7J4P1_MEDTR	0	99.91	AT4G36180.1 | Symbols: | Leucine-rich receptor-like protein kinase family protein | chr4:17120209-17123698 REVERSE LENGTH=1136	0	99.91	GO:0000226 GO:0000911 GO:0002237 GO:0006260 GO:0006306 GO:0006468 GO:0007165 GO:0007169 GO:0008283 GO:0009855 GO:0010014 GO:0010073 GO:0010075 GO:0010103 GO:0030244 GO:0048443 GO:0051322 GO:0051567	microtubule cytoskeleton organization; cytokinesis by cell plate formation; response to molecule of bacterial origin; DNA replication; DNA methylation; protein phosphorylation; signal transduction; transmembrane receptor protein tyrosine kinase signaling pathway; cell proliferation; determination of bilateral symmetry; meristem initiation; meristem maintenance; regulation of meristem growth; stom…	GO:0004672 GO:0004674 GO:0005524 GO:0016301 GO:0016772	protein kinase activity; protein serine/threonine kinase activity; ATP binding; kinase activity; transferase activity, transferring phosphorus-containing groups	GO:0005886	plasma membrane	PF00069 PF00560 PF08263	Protein kinase domain; Leucine Rich Repeat; Leucine rich repeat N-terminal domain	PTHR24420 PTHR24420:SF687	FAMILY NOT NAMED;	KOG1187	Serine/threonine_protein_kinase	NA	NA	NA	NA
Glyma06g02940	993	UniRef100_UPI00023398E6 UPI00023398E6 related cluster n=1 Tax=unknown RepID=UPI00023398E6	0	99.9	UniRef100_B9R839 ATP binding protein, putative n=1 Tax=Ricinus communis RepID=B9R839_RICCO	0	49.95	AT4G24170.1 | Symbols: | ATP binding microtubule motor family protein | chr4:12543206-12546805 FORWARD LENGTH=1004	1e-176	50.25	GO:0007018	microtubule-based movement	GO:0003777 GO:0005524	microtubule motor activity; ATP binding	GO:0005634	nucleus	PF00225 PF11995	Kinesin motor domain; Domain of unknown function (DUF3490)	PTHR24115 PTHR24115:SF189	FAMILY NOT NAMED; SUBFAMILY NOT NAMED	KOG0242	Kinesin-like_protein	NA	NA	NA	NA
Glyma06g02950	631	UniRef100_UPI00023398E7 UPI00023398E7 related cluster n=1 Tax=unknown RepID=UPI00023398E7	0	99.84	UniRef100_G7J4N6 Transmembrane and coiled-coil domain-containing protein n=1 Tax=Medicago truncatula RepID=G7J4N6_MEDTR	0	99.84	AT4G36210.3 | Symbols: | Protein of unknown function (DUF726) | chr4:17130354-17134302 FORWARD LENGTH=672	0	98.1	GO:0008150 GO:0045892	biological process; negative regulation of transcription, DNA-dependent	GO:0003674	molecular function	GO:0009507	chloroplast	PF05277	Protein of unknown function (DUF726)	PTHR17920	UNCHARACTERIZED	KOG2385	Uncharacterized_conserved_protein	NA	NA	NA	NA
Glyma06g02960	222	UniRef100_I1K7M2 Uncharacterized protein (Fragment) n=1 Tax=Glycine max RepID=I1K7M2_SOYBN	5e-109	79.73	NA	NA	NA	NA	NA	NA	NA	NA	NA	NA	NA	NA	NA	NA	NA	NA	NA	NA	NA	NA	NA	NA
Glyma06g02970	246	UniRef100_UPI000189D240 UPI000189D240 related cluster n=1 Tax=unknown RepID=UPI000189D240	0	99.59	UniRef100_D9ZIW4 COL domain class transcription factor n=1 Tax=Malus x domestica RepID=D9ZIW4_MALDO	1e-78	99.19	AT1G75540.1 | Symbols: STH2 | salt tolerance homolog2 | chr1:28366059-28367398 FORWARD LENGTH=331	2e-60	99.59	GO:0006355 GO:0009641	regulation of transcription, DNA-dependent; shade avoidance	GO:0003700 GO:0005515 GO:0008270	sequence-specific DNA binding transcription factor activity; protein binding; zinc ion binding	GO:0005622 GO:0005634	intracellular; nucleus	PF00643	B-box zinc finger	NA	NA	NA	NA	NA	NA	NA	NA
Glyma06g02980	842	UniRef100_UPI00023398E9 UPI00023398E9 related cluster n=1 Tax=unknown RepID=UPI00023398E9	0	99.88	UniRef100_G7J4N3 Microspherule protein n=1 Tax=Medicago truncatula RepID=G7J4N3_MEDTR	0	98.46	AT3G54350.3 | Symbols: emb1967 | Forkhead-associated (FHA) domain-containing protein | chr3:20122298-20126031 REVERSE LENGTH=702	2e-82	61.05	GO:0006312 GO:0006346 GO:0009560 GO:0009630 GO:0009793 GO:0016246	mitotic recombination; methylation-dependent chromatin silencing; embryo sac egg cell differentiation; gravitropism; embryo development ending in seed dormancy; RNA interference	GO:0003674	molecular function	GO:0005634	nucleus	PF00498	FHA domain	PTHR13233	MICROSPHERULE PROTEIN 1	NA	NA	NA	NA	NA	NA
Glyma06g02990	228	UniRef100_Q5VKS3 MADS-box protein GmNMH7 n=2 Tax=Glycine max RepID=Q5VKS3_SOYBN	1e-168	99.56	UniRef100_Q5VKS3 MADS-box protein GmNMH7 n=2 Tax=Glycine max RepID=Q5VKS3_SOYBN	1e-168	99.56	AT3G54340.1 | Symbols: AP3, ATAP3 | K-box region and MADS-box transcription factor family protein | chr3:20119428-20121087 REVERSE LENGTH=232	5e-90	99.12	GO:0006355 GO:0009827 GO:0009860 GO:0009886 GO:0009909 GO:0010093 GO:0048440 GO:0048441 GO:0048443 GO:0048481 GO:0048507	regulation of transcription, DNA-dependent; plant-type cell wall modification; pollen tube growth; post-embryonic morphogenesis; regulation of flower development; specification of floral organ identity; carpel development; petal development; stamen development; ovule development; meristem development	GO:0003677 GO:0003700 GO:0046983	DNA binding; sequence-specific DNA binding transcription factor activity; protein dimerization activity	GO:0005634	nucleus	PF01486 PF00319	K-box region; SRF-type transcription factor (DNA-binding and dimerisation domain)	PTHR11945 PTHR11945:SF76	MADS BOX PROTEIN; SUBFAMILY NOT NAMED	KOG0014	MADS_box_transcription_factor	NA	NA	K09264	MADS-box_transcription_factor,_plant
Glyma06g03000	303	UniRef100_I1K7M5 Serine/threonine-protein phosphatase n=2 Tax=Glycine max RepID=I1K7M5_SOYBN	0	99.67	UniRef100_I1K7M5 Serine/threonine-protein phosphatase n=2 Tax=Glycine max RepID=I1K7M5_SOYBN	0	99.67	AT2G39840.1 | Symbols: TOPP4 | type one serine/threonine protein phosphatase 4 | chr2:16627430-16628789 FORWARD LENGTH=321	3e-179	95.38	GO:0006470 GO:0006499	protein dephosphorylation; N-terminal protein myristoylation	GO:0004722 GO:0016787	protein serine/threonine phosphatase activity; hydrolase activity	GO:0000164 GO:0005737	protein phosphatase type 1 complex; cytoplasm	PF00149	Calcineurin-like phosphoesterase	PTHR11668 PTHR11668:SF136	SERINE/THREONINE PROTEIN PHOSPHATASE; SUBFAMILY NOT NAMED	KOG0374	Serine/threonine_specific_protein_phosphatase_PP1,_catalytic_subunit	NA	NA	NA	NA
Glyma06g03030	302	UniRef100_UPI00023398EC UPI00023398EC related cluster n=1 Tax=unknown RepID=UPI00023398EC	0	99.67	UniRef100_E6NU70 JHL18I08.14 protein n=1 Tax=Jatropha curcas RepID=E6NU70_9ROSI	5e-87	99.67	AT1G19790.2 | Symbols: SRS7 | SHI-related sequence 7 | chr1:6838400-6839831 REVERSE LENGTH=345	8e-79	99.34	GO:0008150	biological process	GO:0003674	molecular function	GO:0005634	nucleus	PF05142	Domain of unknown function (DUF702)	NA	NA	NA	NA	NA	NA	NA	NA
Glyma06g03040	816	UniRef100_I1K7M8 Uncharacterized protein n=1 Tax=Glycine max RepID=I1K7M8_SOYBN	0	99.88	UniRef100_E6NU69 JHL18I08.13 protein n=1 Tax=Jatropha curcas RepID=E6NU69_9ROSI	0	99.75	AT4G39080.1 | Symbols: VHA-A3 | vacuolar proton ATPase A3 | chr4:18209513-18214752 FORWARD LENGTH=821	0	98.53	GO:0000902 GO:0006816 GO:0007030 GO:0007033 GO:0009651 GO:0015986 GO:0016049 GO:0031669 GO:0032119 GO:0043181 GO:0048193 GO:0070072	cell morphogenesis; calcium ion transport; Golgi organization; vacuole organization; response to salt stress; ATP synthesis coupled proton transport; cell growth; cellular response to nutrient levels; sequestering of zinc ion; vacuolar sequestering; Golgi vesicle transport; vacuolar proton-transporting V-type ATPase complex assembly	GO:0009678 GO:0016887 GO:0045735	hydrogen-translocating pyrophosphatase activity; ATPase activity; nutrient reservoir activity	GO:0000325 GO:0005737 GO:0005773 GO:0005774 GO:0005794 GO:0005886 GO:0009507 GO:0009705 GO:0009941 GO:0016020	plant-type vacuole; cytoplasm; vacuole; vacuolar membrane; Golgi apparatus; plasma membrane; chloroplast; plant-type vacuole membrane; chloroplast envelope; membrane	PF01496	V-type ATPase 116kDa subunit family	PTHR11629 PTHR11629:SF11	VACUOLAR PROTON ATPASES; VACUOLAR PROTON ATPASE	KOG2189	Vacuolar_H+-ATPase_V0_sector,_subunit_a	NA	NA	NA	NA
Glyma06g03050	367	UniRef100_C6TDZ7 Uncharacterized protein n=1 Tax=Glycine max RepID=C6TDZ7_SOYBN	0	99.73	UniRef100_E6NU68 JHL18I08.12 protein n=1 Tax=Jatropha curcas RepID=E6NU68_9ROSI	0	96.73	AT4G39090.1 | Symbols: RD19, RD19A | Papain family cysteine protease | chr4:18215826-18217326 REVERSE LENGTH=368	0	96.46	GO:0006096 GO:0006508 GO:0006833 GO:0006970 GO:0006972 GO:0007030 GO:0009266 GO:0009269 GO:0009414 GO:0009651 GO:0042742 GO:0046686	glycolysis; proteolysis; water transport; response to osmotic stress; hyperosmotic response; Golgi organization; response to temperature stimulus; response to desiccation; response to water deprivation; response to salt stress; defense response to bacterium; response to cadmium ion	GO:0004197 GO:0008234	cysteine-type endopeptidase activity; cysteine-type peptidase activity	GO:0005576 GO:0005634 GO:0005773	extracellular region; nucleus; vacuole	PF08246 PF00112	Cathepsin propeptide inhibitor domain (I29); Papain family cysteine protease	PTHR12411 PTHR12411:SF42	CYSTEINE PROTEASE FAMILY C1-RELATED; CATHEPSIN-W-RELATED	KOG1542	Cysteine_proteinase_Cathepsin_F	3.4.22.-	Cysteine_endopeptidases	K01376	cathepsin_V_[EC:3.4.22.43]
Glyma06g03060	144	NA	NA	NA	NA	NA	NA	NA	NA	NA	NA	NA	NA	NA	NA	NA	NA	NA	NA	NA	NA	NA	NA	NA	NA	NA
Glyma06g03070	263	UniRef100_I1K7N0 Uncharacterized protein n=1 Tax=Glycine max RepID=I1K7N0_SOYBN	0	99.62	UniRef100_E6NU66 JHL18I08.10 protein n=1 Tax=Jatropha curcas RepID=E6NU66_9ROSI	1e-152	99.62	AT1G75510.1 | Symbols: | Transcription initiation factor IIF, beta subunit | chr1:28347254-28348629 REVERSE LENGTH=261	3e-121	94.3	GO:0000394 GO:0006366 GO:0006367	RNA splicing, via endonucleolytic cleavage and ligation; transcription from RNA polymerase II promoter; transcription initiation from RNA polymerase II promoter	GO:0003824 GO:0005524 GO:0008026	catalytic activity; ATP binding; ATP-dependent helicase activity	GO:0005634 GO:0005674 GO:0005739	nucleus; transcription factor TFIIF complex; mitochondrion	PF02270	Transcription initiation factor IIF, beta subunit	PTHR10445	TRANSCRIPTION INITIATION FACTOR IIF (TFIIF), BETA SUBUNIT-RELATED	KOG2905	Transcription_initiation_factor_IIF,_small_subunit_(RAP30)	3.6.4.12	NA	K03139	transcription_initiation_factor_TFIIF_subunit_beta_[EC:3.6.4.12]
Glyma06g03080	390	UniRef100_UPI000189D588 UPI000189D588 related cluster n=1 Tax=unknown RepID=UPI000189D588	0	99.74	UniRef100_E6NU65 JHL18I08.9 protein n=1 Tax=Jatropha curcas RepID=E6NU65_9ROSI	0	99.74	AT1G75500.2 | Symbols: WAT1 | Walls Are Thin 1 | chr1:28338282-28340091 REVERSE LENGTH=389	0	99.74	GO:0000271 GO:0006833 GO:0007389 GO:0008361 GO:0009651 GO:0009750 GO:0009825 GO:0009826 GO:0009834 GO:0009926 GO:0009932 GO:0010015 GO:0010075 GO:0010817 GO:0040007 GO:0043481 GO:0048767 GO:0071555 GO:0090355 GO:0090358	polysaccharide biosynthetic process; water transport; pattern specification process; regulation of cell size; response to salt stress; response to fructose stimulus; multidimensional cell growth; unidimensional cell growth; secondary cell wall biogenesis; auxin polar transport; cell tip growth; root morphogenesis; regulation of meristem growth; regulation of hormone levels; growth; anthocyanin ac…	NA	NA	GO:0005774 GO:0005886 GO:0009705 GO:0016020	vacuolar membrane; plasma membrane; plant-type vacuole membrane; membrane	PF00892	EamA-like transporter family	NA	NA	NA	NA	NA	NA	NA	NA
Glyma06g03110	250	UniRef100_UPI000189D0E5 UPI000189D0E5 related cluster n=1 Tax=unknown RepID=UPI000189D0E5	0	99.6	UniRef100_G7I5V5 Ethylene-responsive transcription factor ERF071 n=1 Tax=Medicago truncatula RepID=G7I5V5_MEDTR	2e-80	99.6	AT1G75490.1 | Symbols: | Integrase-type DNA-binding superfamily protein | chr1:28336045-28336665 FORWARD LENGTH=206	2e-48	92.8	GO:0006355 GO:0010200	regulation of transcription, DNA-dependent; response to chitin	GO:0003677 GO:0003700	DNA binding; sequence-specific DNA binding transcription factor activity	GO:0005634	nucleus	PF00847	AP2 domain	NA	NA	NA	NA	NA	NA	NA	NA
Glyma06g03120	216	UniRef100_I1K7N3 Uncharacterized protein n=2 Tax=Glycine max RepID=I1K7N3_SOYBN	2e-156	99.54	UniRef100_E6NU60 JHL18I08.4 protein n=1 Tax=Jatropha curcas RepID=E6NU60_9ROSI	2e-123	99.54	AT1G06060.1 | Symbols: | LisH and RanBPM domains containing protein | chr1:1833071-1834516 FORWARD LENGTH=213	4e-104	98.61	GO:0008150	biological process	GO:0003674	molecular function	NA	NA	PF10607	Ran binding protein in the microtubule-organising centre	PTHR12864	RAN BINDING PROTEIN 9-RELATED	KOG2659	LisH_motif-containing_protein	NA	NA	NA	NA
Glyma06g03140	284	UniRef100_I1K7N5 Uncharacterized protein n=1 Tax=Glycine max RepID=I1K7N5_SOYBN	0	99.65	UniRef100_B9R814 ATP-dependent peptidase, putative n=1 Tax=Ricinus communis RepID=B9R814_RICCO	3e-139	98.59	AT1G75460.1 | Symbols: | ATP-dependent protease La (LON) domain protein | chr1:28327986-28328822 FORWARD LENGTH=278	1e-118	78.52	GO:0000165 GO:0006355 GO:0006508 GO:0006612 GO:0009617 GO:0009862 GO:0009867 GO:0010207 GO:0010310 GO:0010363 GO:0031348 GO:0035304	MAPK cascade; regulation of transcription, DNA-dependent; proteolysis; protein targeting to membrane; response to bacterium; systemic acquired resistance, salicylic acid mediated signaling pathway; jasmonic acid mediated signaling pathway; photosystem II assembly; regulation of hydrogen peroxide metabolic process; regulation of plant-type hypersensitive response; negative regulation of defense re…	GO:0004176	ATP-dependent peptidase activity	GO:0009507	chloroplast	PF02190	ATP-dependent protease La (LON) domain	PTHR23327	UNCHARACTERIZED	NA	NA	NA	NA	NA	NA
Glyma06g03150	118	UniRef100_I1K7N6 Thioredoxin n=1 Tax=Glycine max RepID=I1K7N6_SOYBN	2e-76	99.15	UniRef100_I1K7N6 Thioredoxin n=1 Tax=Glycine max RepID=I1K7N6_SOYBN	2e-76	99.15	AT3G51030.1 | Symbols: ATTRX1, ATTRX H1, TRX1 | thioredoxin H-type 1 | chr3:18951123-18951955 REVERSE LENGTH=114	1e-57	94.92	GO:0006662 GO:0043085 GO:0045454	glycerol ether metabolic process; positive regulation of catalytic activity; cell redox homeostasis	GO:0008047 GO:0009055 GO:0015035 GO:0016671	iron-sulfur cluster assembly; electron carrier activity; protein disulfide oxidoreductase activity; oxidoreductase activity, acting on a sulfur group of donors, disulfide as acceptor	GO:0005737 GO:0005829 GO:0048046	cytoplasm; cytosol; apoplast	PF00085	Thioredoxin	PTHR10438	THIOREDOXIN-RELATED	KOG0907	Thioredoxin	NA	NA	NA	NA
Glyma06g03160	719	UniRef100_I1K7N7 Uncharacterized protein n=1 Tax=Glycine max RepID=I1K7N7_SOYBN	0	95.13	UniRef100_Q9ZRV9 Beta-galactosidase n=1 Tax=Cicer arietinum RepID=Q9ZRV9_CICAR	0	98.89	AT4G36360.2 | Symbols: BGAL3 | beta-galactosidase 3 | chr4:17176840-17181143 REVERSE LENGTH=855	0	97.64	GO:0005975 GO:0005990 GO:0006598 GO:0009664 GO:0009698 GO:0009832 GO:0010075 GO:0019513 GO:0019515 GO:0042398	carbohydrate metabolic process; lactose catabolic process; polyamine catabolic process; plant-type cell wall organization; phenylpropanoid metabolic process; plant-type cell wall biogenesis; regulation of meristem growth; lactose catabolic process, using glucoside 3-dehydrogenase; lactose catabolic process via UDP-galactose; cellular modified amino acid biosynthetic process	GO:0003824 GO:0004553 GO:0004565 GO:0030246 GO:0043169	catalytic activity; hydrolase activity, hydrolyzing O-glycosyl compounds; beta-galactosidase activity; carbohydrate binding; cation binding	GO:0005576	extracellular region	PF01301	Glycosyl hydrolases family 35	PTHR23421 PTHR23421:SF33	BETA-GALACTOSIDASE RELATED; SUBFAMILY NOT NAMED	KOG0496	Beta-galactosidase	NA	NA	NA	NA
Glyma06g03180	531	UniRef100_I1K7N8 Uncharacterized protein (Fragment) n=2 Tax=Glycine max RepID=I1K7N8_SOYBN	0	97.93	UniRef100_B9R807 Gulonolactone oxidase, putative n=1 Tax=Ricinus communis RepID=B9R807_RICCO	0	96.61	AT1G75450.1 | Symbols: CKX5, ATCKX5, ATCKX6 | cytokinin oxidase 5 | chr1:28315248-28318064 REVERSE LENGTH=540	0	96.99	GO:0009690 GO:0009694 GO:0009753 GO:0009823 GO:0055114	cytokinin metabolic process; jasmonic acid metabolic process; response to jasmonic acid stimulus; cytokinin catabolic process; oxidation-reduction process	GO:0003824 GO:0008762 GO:0016491 GO:0016614 GO:0019139 GO:0050660	catalytic activity; UDP-N-acetylmuramate dehydrogenase activity; oxidoreductase activity; oxidoreductase activity, acting on CH-OH group of donors; cytokinin dehydrogenase activity; flavin adenine dinucleotide binding	GO:0005576	extracellular region	PF01565 PF09265	FAD binding domain; Cytokinin dehydrogenase 1, FAD and cytokinin binding	PTHR13878 PTHR13878:SF19	GULONOLACTONE OXIDASE; SUBFAMILY NOT NAMED	KOG1231	Proteins_containing_the_FAD_binding_domain	1.5.99.12	cytokinin_dehydrogenase	K00279	cytokinin_dehydrogenase_[EC:1.5.99.12]
Glyma06g03190	353	UniRef100_I1K7N9 Uncharacterized protein n=1 Tax=Glycine max RepID=I1K7N9_SOYBN	0	99.72	UniRef100_B9R806 Uroporphyrin-III methyltransferase, putative n=1 Tax=Ricinus communis RepID=B9R806_RICCO	1e-159	99.72	AT1G45110.1 | Symbols: | Tetrapyrrole (Corrin/Porphyrin) Methylases | chr1:17052572-17054546 FORWARD LENGTH=343	2e-157	94.62	GO:0006261 GO:0008152 GO:0009407 GO:0010583	DNA-dependent DNA replication; metabolic process; toxin catabolic process; response to cyclopentenone	GO:0008168	methyltransferase activity	NA	NA	PF00590	Tetrapyrrole (Corrin/Porphyrin) Methylases	PTHR21091 PTHR21091:SF18	METHYLTETRAHYDROFOLATE:HOMOCYSTEINE METHYLTRANSFERASE RELATED; S-ADENOSYLMETHIONINE-DEPENDENT METHYTRANSFERASE	NA	NA	NA	NA	K07056	TatD-related_deoxyribonuclease
Glyma06g03200	638	UniRef100_I1K7P2 Uncharacterized protein n=1 Tax=Glycine max RepID=I1K7P2_SOYBN	0	99.84	UniRef100_G7I5U5 BEL1-like homeodomain protein n=1 Tax=Medicago truncatula RepID=G7I5U5_MEDTR	0	99.84	AT1G75410.2 | Symbols: BLH3 | BEL1-like homeodomain 3 | chr1:28300095-28301890 REVERSE LENGTH=524	2e-114	56.11	GO:0006355 GO:0048510 GO:0048513	regulation of transcription, DNA-dependent; regulation of timing of transition from vegetative to reproductive phase; organ development	GO:0003677 GO:0003700 GO:0005515 GO:0043565	DNA binding; sequence-specific DNA binding transcription factor activity; protein binding; sequence-specific DNA binding	GO:0005634	nucleus	PF07526 PF00046	Associated with HOX; Homeobox domain	PTHR11850 PTHR11850:SF14	HOMEOBOX PROTEIN; BEL1 HOMEOTIC PROTEIN	KOG0773	Transcription_factor_MEIS1_and_related_HOX_domain_proteins	NA	NA	NA	NA
Glyma06g03210	448	UniRef100_UPI0002339A59 UPI0002339A59 related cluster n=1 Tax=unknown RepID=UPI0002339A59	0	99.78	UniRef100_B9R804 Bel1 homeotic protein, putative n=1 Tax=Ricinus communis RepID=B9R804_RICCO	9e-177	99.78	AT1G75430.1 | Symbols: BLH11 | BEL1-like homeodomain 11 | chr1:28308121-28309517 REVERSE LENGTH=290	1e-100	59.15	GO:0006355	regulation of transcription, DNA-dependent	GO:0003700 GO:0043565	sequence-specific DNA binding transcription factor activity; sequence-specific DNA binding	GO:0005634	nucleus	PF00046 PF07526	Homeobox domain; Associated with HOX	PTHR11850 PTHR11850:SF14	HOMEOBOX PROTEIN; BEL1 HOMEOTIC PROTEIN	KOG0773	Transcription_factor_MEIS1_and_related_HOX_domain_proteins	NA	NA	NA	NA
Glyma06g03220	465	UniRef100_I1K7P4 Uncharacterized protein n=1 Tax=Glycine max RepID=I1K7P4_SOYBN	0	99.78	UniRef100_B9R7Z9 Glycosyltransferase, putative n=1 Tax=Ricinus communis RepID=B9R7Z9_RICCO	0	99.57	AT1G75420.1 | Symbols: | UDP-Glycosyltransferase superfamily protein | chr1:28305469-28307317 FORWARD LENGTH=463	0	98.06	GO:0001666 GO:0009058 GO:0019375	response to hypoxia; biosynthetic process; galactolipid biosynthetic process	GO:0016757	transferase activity, transferring glycosyl groups	GO:0005768 GO:0005794 GO:0005802	endosome; Golgi apparatus; trans-Golgi network	PF00534	Glycosyl transferases group 1	PTHR12526 PTHR12526:SF41	GLYCOSYLTRANSFERASE; GLYCOSYLTRANSFERASE	KOG0853	Glycosyltransferase	NA	NA	NA	NA
Glyma06g03230	399	UniRef100_UPI000189D0C4 UPI000189D0C4 related cluster n=1 Tax=unknown RepID=UPI000189D0C4	0	99.75	UniRef100_B9R7Z7 26S protease regulatory subunit S10b, putative n=2 Tax=fabids RepID=B9R7Z7_RICCO	0	99.25	AT1G45000.1 | Symbols: | AAA-type ATPase family protein | chr1:17009220-17011607 FORWARD LENGTH=399	0	99.75	GO:0030163 GO:0030244 GO:0048193	protein catabolic process; cellulose biosynthetic process; Golgi vesicle transport	GO:0000166 GO:0005524 GO:0016787 GO:0016887 GO:0017111	nucleotide binding; ATP binding; hydrolase activity; ATPase activity; nucleoside-triphosphatase activity	GO:0000502 GO:0005618 GO:0005634 GO:0005730 GO:0005886 GO:0009506 GO:0016020	proteasome complex; cell wall; nucleus; nucleolus; plasma membrane; plasmodesma; membrane	PF00004	ATPase family associated with various cellular activities (AAA)	PTHR23073 PTHR23073:SF10	26S PROTEASE REGULATORY SUBUNIT; 26S PROTEASE REGULATORY SUBUNIT S10B	KOG0651	26S_proteasome_regulatory_complex,_ATPase_RPT4	NA	NA	K03064	26S_proteasome_regulatory_subunit_T4
Glyma06g03240	433	UniRef100_UPI0002339A5A UPI0002339A5A related cluster n=1 Tax=unknown RepID=UPI0002339A5A	0	99.77	UniRef100_B9R7Z4 Ubiquitin-protein ligase, putative n=1 Tax=Ricinus communis RepID=B9R7Z4_RICCO	2e-177	99.54	AT1G75400.1 | Symbols: | RING/U-box superfamily protein | chr1:28297609-28299464 FORWARD LENGTH=455	1e-114	99.77	GO:0006499	N-terminal protein myristoylation	GO:0008270	zinc ion binding	GO:0005634	nucleus	NA	NA	NA	NA	NA	NA	NA	NA	NA	NA
Glyma06g03250	154	UniRef100_I1K7P6 Uncharacterized protein n=1 Tax=Glycine max RepID=I1K7P6_SOYBN	8e-105	98.05	UniRef100_Q0GPI2 BZIP transcription factor bZIP44 n=2 Tax=Glycine max RepID=Q0GPI2_SOYBN	4e-70	87.01	AT1G75390.1 | Symbols: AtbZIP44, bZIP44 | basic leucine-zipper 44 | chr1:28292224-28292745 FORWARD LENGTH=173	1e-39	72.08	GO:0006355 GO:0009410 GO:0030968	regulation of transcription, DNA-dependent; response to xenobiotic stimulus; endoplasmic reticulum unfolded protein response	GO:0003677 GO:0003700 GO:0043565 GO:0046982 GO:0046983	DNA binding; sequence-specific DNA binding transcription factor activity; sequence-specific DNA binding; protein heterodimerization activity; protein dimerization activity	GO:0005634	nucleus	PF00170	bZIP transcription factor	PTHR22952 PTHR22952:SF60	CAMP-RESPONSE ELEMENT BINDING PROTEIN-RELATED; SUBFAMILY NOT NAMED	NA	NA	NA	NA	NA	NA
Glyma06g03270	372	UniRef100_I1K7P7 Uncharacterized protein n=1 Tax=Glycine max RepID=I1K7P7_SOYBN	0	99.73	UniRef100_Q9M6R8 MAP kinase PsMAPK2 n=1 Tax=Pisum sativum RepID=Q9M6R8_PEA	0	99.46	AT1G10210.2 | Symbols: ATMPK1, MPK1 | mitogen-activated protein kinase 1 | chr1:3349579-3350776 FORWARD LENGTH=370	0	97.85	GO:0000165 GO:0000303 GO:0006355 GO:0006468 GO:0006612 GO:0006635 GO:0006970 GO:0007165 GO:0008219 GO:0009409 GO:0009617 GO:0009651 GO:0009733 GO:0009734 GO:0009737 GO:0009743 GO:0009751 GO:0009755 GO:0009862 GO:0009863 GO:0009867 GO:0009873 GO:0010310 GO:0010363 GO:0010374 GO:0016558 GO:0031348 GO:0035304 GO:0035556 GO:0043069 GO:0048481 GO:0051707	MAPK cascade; response to superoxide; regulation of transcription, DNA-dependent; protein phosphorylation; protein targeting to membrane; fatty acid beta-oxidation; response to osmotic stress; signal transduction; cell death; response to cold; response to bacterium; response to salt stress; response to auxin stimulus; auxin mediated signaling pathway; response to abscisic acid stimulus; response …	GO:0004672 GO:0004674 GO:0004707 GO:0005524 GO:0016301 GO:0016772	protein kinase activity; protein serine/threonine kinase activity; MAP kinase activity; ATP binding; kinase activity; transferase activity, transferring phosphorus-containing groups	GO:0005634	nucleus	PF00069	Protein kinase domain	PTHR24055	MITOGEN-ACTIVATED PROTEIN KINASE	KOG0660	Mitogen-activated_protein_kinase	2.7.11.24	mitogen-activated_protein_kinase	K04371	extracellular_signal-regulated_kinase_1/2_[EC:2.7.11.24]
Glyma06g03280	437	UniRef100_I1K7P9 Uncharacterized protein n=1 Tax=Glycine max RepID=I1K7P9_SOYBN	0	99.77	UniRef100_Q9SB50 AP-4 complex subunit mu-1 n=1 Tax=Arabidopsis thaliana RepID=Q9SB50_ARATH	0	99.77	AT4G24550.2 | Symbols: | Clathrin adaptor complexes medium subunit family protein | chr4:12675873-12678903 FORWARD LENGTH=451	0	99.77	GO:0006623 GO:0006810 GO:0006886 GO:0016192	protein targeting to vacuole; transport; intracellular protein transport; vesicle-mediated transport	NA	NA	GO:0005622 GO:0005634 GO:0005829 GO:0030125	intracellular; nucleus; cytosol; clathrin vesicle coat	PF01217 PF00928	Clathrin adaptor complex small chain; Adaptor complexes medium subunit family	PTHR11998 PTHR11998:SF13	CLATHRIN COAT ASSEMBLY PROTEIN; CLATHRIN COAT ASSEMBLY PROTEIN AP50	KOG0937	Adaptor_complexes_medium_subunit_family	NA	NA	NA	NA
Glyma06g03290	453	UniRef100_I1K7Q0 Uncharacterized protein n=1 Tax=Glycine max RepID=I1K7Q0_SOYBN	0	98.9	UniRef100_B9R7Y9 Taxadien-5-alpha-ol O-acetyltransferase, putative n=1 Tax=Ricinus communis RepID=B9R7Y9_RICCO	0	95.81	AT1G27620.1 | Symbols: | HXXXD-type acyl-transferase family protein | chr1:9608444-9610432 FORWARD LENGTH=442	0	94.92	NA	NA	GO:0016740 GO:0016747	transferase activity; transferase activity, transferring acyl groups other than amino-acyl groups	GO:0005737	cytoplasm	PF02458	Transferase family	NA	NA	NA	NA	NA	NA	NA	NA
Glyma06g03300	593	UniRef100_UPI0002339A5E UPI0002339A5E related cluster n=1 Tax=unknown RepID=UPI0002339A5E	0	98.99	UniRef100_Q94FN1 Phosphatidylinositol transfer-like protein III n=1 Tax=Lotus japonicus RepID=Q94FN1_LOTJA	0	98.99	AT4G39170.1 | Symbols: | Sec14p-like phosphatidylinositol transfer family protein | chr4:18240887-18243621 FORWARD LENGTH=614	0	98.65	GO:0006810	transport	GO:0005215 GO:0008526	transporter activity; phosphatidylinositol transporter activity	GO:0005622 GO:0005794 GO:0005886	intracellular; Golgi apparatus; plasma membrane	PF00650 PF03765	CRAL/TRIO domain; CRAL/TRIO, N-terminus	PTHR23324 PTHR23324:SF5	SEC14 RELATED PROTEIN; SEC14 CYTOSOLIC FACTOR-RELATED	KOG1471	Phosphatidylinositol_transfer_protein_SEC14_and_related_proteins	NA	NA	NA	NA
Glyma06g03310	458	UniRef100_I1K7Q2 Uncharacterized protein n=1 Tax=Glycine max RepID=I1K7Q2_SOYBN	0	99.78	UniRef100_A7X641 Inositol pentakisphosphate 2-kinase n=1 Tax=Glycine max RepID=A7X641_SOYBN	0	97.6	AT1G22100.1 | Symbols: | Inositol-pentakisphosphate 2-kinase family protein | chr1:7798023-7800030 REVERSE LENGTH=441	0	95.41	NA	NA	GO:0005524 GO:0035299	ATP binding; inositol pentakisphosphate 2-kinase activity	GO:0005634	nucleus	PF06090	Inositol-pentakisphosphate 2-kinase	PTHR14456 PTHR14456:SF6	INOSITOL POLYPHOSPHATE KINASE 1; gb def: Hypothetical protein MJB21.19	KOG4749	Inositol_polyphosphate_kinase	NA	NA	NA	NA
Glyma06g03320	270	UniRef100_UPI0002339A5F UPI0002339A5F related cluster n=1 Tax=unknown RepID=UPI0002339A5F	0	99.63	UniRef100_F4HP86 Cytochrome P450, family 722, subfamily A, polypeptide 1 n=1 Tax=Arabidopsis thaliana RepID=F4HP86_ARATH	1e-57	48.15	AT1G19630.1 | Symbols: CYP722A1 | cytochrome P450, family 722, subfamily A, polypeptide 1 | chr1:6785427-6787967 REVERSE LENGTH=476	3e-60	48.15	GO:0055114	oxidation-reduction process	GO:0005506 GO:0009055 GO:0016705 GO:0019825 GO:0020037	iron ion binding; electron carrier activity; oxidoreductase activity, acting on paired donors, with incorporation or reduction of molecular oxygen; oxygen binding; heme binding	GO:0005576	extracellular region	PF00067	Cytochrome P450	PTHR24286 PTHR24286:SF25	FAMILY NOT NAMED;	NA	NA	NA	NA	NA	NA
Glyma06g03330	226	UniRef100_I1K7Q4 Uncharacterized protein n=1 Tax=Glycine max RepID=I1K7Q4_SOYBN	2e-163	99.56	NA	NA	NA	NA	NA	NA	NA	NA	NA	NA	NA	NA	NA	NA	NA	NA	NA	NA	NA	NA	NA	NA
Glyma06g03340	532	UniRef100_UPI000170AD44 UPI000170AD44 related cluster n=1 Tax=unknown RepID=UPI000170AD44	0	99.81	UniRef100_I3S8A5 Glucose-1-phosphate adenylyltransferase n=1 Tax=Lotus japonicus RepID=I3S8A5_LOTJA	0	99.81	AT1G27680.1 | Symbols: APL2 | ADPGLC-PPase large subunit | chr1:9631630-9634450 FORWARD LENGTH=518	0	95.49	GO:0009058 GO:0019252	biosynthetic process; starch biosynthetic process	GO:0008878 GO:0016779	glucose-1-phosphate adenylyltransferase activity; nucleotidyltransferase activity	GO:0009507	chloroplast	PF00483	Nucleotidyl transferase	PTHR22572 PTHR22572:SF10	SUGAR-1-PHOSPHATE GUANYL TRANSFERASE; GLUCOSE-1-PHOSPHATE ADENYLYLTRANSFERASE	KOG1322	GDP-mannose_pyrophosphorylase/mannose-1-phosphate_guanylyltransferase	2.7.7.27	Glucose-1-phosphate_adenylyltransferase	K00975	glucose-1-phosphate_adenylyltransferase_[EC:2.7.7.27]
Glyma06g03350	421	UniRef100_I1K7Q5 Uncharacterized protein n=1 Tax=Glycine max RepID=I1K7Q5_SOYBN	0	99.76	UniRef100_E5GCI6 Endo-beta-mannanase n=1 Tax=Cucumis melo subsp. melo RepID=E5GCI6_CUCME	0	93.35	AT5G66460.1 | Symbols: MAN7, AtMAN7 | Glycosyl hydrolase superfamily protein | chr5:26538911-26540837 REVERSE LENGTH=431	0	98.34	GO:0008152 GO:0009845 GO:0009855 GO:0009944 GO:0010014 GO:0010075	metabolic process; seed germination; determination of bilateral symmetry; polarity specification of adaxial/abaxial axis; meristem initiation; regulation of meristem growth	GO:0003824 GO:0004553 GO:0043169	catalytic activity; hydrolase activity, hydrolyzing O-glycosyl compounds; cation binding	GO:0005576	extracellular region	PF00150	Cellulase (glycosyl hydrolase family 5)	NA	NA	NA	NA	NA	NA	NA	NA
Glyma06g03370	129	UniRef100_I1JT95 Uncharacterized protein n=2 Tax=Glycine max RepID=I1JT95_SOYBN	3e-37	80.62	UniRef100_B9R7W8 Protein yrdA, putative n=1 Tax=Ricinus communis RepID=B9R7W8_RICCO	1e-36	79.84	AT1G19580.1 | Symbols: GAMMA CA1 | gamma carbonic anhydrase 1 | chr1:6774937-6777092 FORWARD LENGTH=275	1e-33	69.77	GO:0009853 GO:0019252	photorespiration; starch biosynthetic process	GO:0004089 GO:0016740	carbonate dehydratase activity; transferase activity	GO:0005737 GO:0005739 GO:0005747 GO:0031966 GO:0045271	cytoplasm; mitochondrion; mitochondrial respiratory chain complex I; mitochondrial membrane; respiratory chain complex I	NA	NA	PTHR22572 PTHR22572:SF47	SUGAR-1-PHOSPHATE GUANYL TRANSFERASE; SUBFAMILY NOT NAMED	NA	NA	NA	NA	NA	NA
Glyma06g03380	274	UniRef100_C6TKS1 Uncharacterized protein n=1 Tax=Glycine max RepID=C6TKS1_SOYBN	0	99.64	UniRef100_B9R7W9 Protein yrdA, putative n=1 Tax=Ricinus communis RepID=B9R7W9_RICCO	2e-174	98.91	AT1G47260.1 | Symbols: APFI, GAMMA CA2 | gamma carbonic anhydrase 2 | chr1:17321384-17323347 REVERSE LENGTH=278	6e-168	96.35	GO:0009651 GO:0009853 GO:0009901 GO:0019252 GO:0070207 GO:2000377	response to salt stress; photorespiration; anther dehiscence; starch biosynthetic process; protein homotrimerization; regulation of reactive oxygen species metabolic process	GO:0004089 GO:0005515	carbonate dehydratase activity; protein binding	GO:0005737 GO:0005739 GO:0005747 GO:0009507 GO:0016020 GO:0031966 GO:0045271	cytoplasm; mitochondrion; mitochondrial respiratory chain complex I; chloroplast; membrane; mitochondrial membrane; respiratory chain complex I	NA	NA	PTHR22572 PTHR22572:SF47	SUGAR-1-PHOSPHATE GUANYL TRANSFERASE; SUBFAMILY NOT NAMED	NA	NA	NA	NA	NA	NA
Glyma06g03410	311	UniRef100_I1K7Q8 Uncharacterized protein n=2 Tax=Glycine max RepID=I1K7Q8_SOYBN	0	99.68	UniRef100_Q05JY0 Pterocarpan reductase n=1 Tax=Lotus japonicus RepID=Q05JY0_LOTJA	0	99.68	AT4G39230.1 | Symbols: | NmrA-like negative transcriptional regulator family protein | chr4:18266024-18267604 REVERSE LENGTH=308	2e-168	99.36	GO:0046686	response to cadmium ion	GO:0000166 GO:0032442	nucleotide binding; phenylcoumaran benzylic ether reductase activity	GO:0005737	cytoplasm	PF05368	NmrA-like family	PTHR10366 PTHR10366:SF62	NAD DEPENDENT EPIMERASE/DEHYDRATASE; EPIMERASE-RELATED	NA	NA	NA	NA	NA	NA
Glyma06g03420	145	UniRef100_I1K7R0 Uncharacterized protein n=1 Tax=Glycine max RepID=I1K7R0_SOYBN	2e-100	99.31	UniRef100_B4YYB7 ST225 n=1 Tax=Eutrema halophilum RepID=B4YYB7_THEHA	2e-20	92.41	AT1G19530.1 | Symbols: | unknown protein; FUNCTIONS IN: molecular_function unknown; INVOLVED IN: N-terminal protein myristoylation, anaerobic respiration; LOCATED IN: cellular_component unknown; EXPRESSED IN: leaf apex, inflorescence meristem, hypocotyl, root, flower; EXPRESSED DURING: petal differentiation and expansion stage; Has 47 Blast hits to 47 proteins in 13 species: Archae - 0; Bacteria …	1e-20	91.03	GO:0006499 GO:0009061	N-terminal protein myristoylation; anaerobic respiration	GO:0003674	molecular function	GO:0005634	nucleus	NA	NA	NA	NA	NA	NA	NA	NA	NA	NA
Glyma06g03430	140	UniRef100_C6SYN8 Uncharacterized protein n=1 Tax=Glycine max RepID=C6SYN8_SOYBN	2e-96	99.29	UniRef100_B4YYB7 ST225 n=1 Tax=Eutrema halophilum RepID=B4YYB7_THEHA	4e-20	92.14	AT1G19530.1 | Symbols: | unknown protein; FUNCTIONS IN: molecular_function unknown; INVOLVED IN: N-terminal protein myristoylation, anaerobic respiration; LOCATED IN: cellular_component unknown; EXPRESSED IN: leaf apex, inflorescence meristem, hypocotyl, root, flower; EXPRESSED DURING: petal differentiation and expansion stage; Has 47 Blast hits to 47 proteins in 13 species: Archae - 0; Bacteria …	4e-20	90.71	GO:0006499 GO:0009061	N-terminal protein myristoylation; anaerobic respiration	GO:0003674	molecular function	GO:0005634	nucleus	NA	NA	NA	NA	NA	NA	NA	NA	NA	NA
Glyma06g03450	206	UniRef100_I1K7R3 Uncharacterized protein n=1 Tax=Glycine max RepID=I1K7R3_SOYBN	6e-149	99.51	UniRef100_B3H6Z2 Cystathionine beta-synthase (CBS) family protein n=1 Tax=Arabidopsis thaliana RepID=B3H6Z2_ARATH	1e-69	83.98	AT1G47271.1 | Symbols: | Cystathionine beta-synthase (CBS) family protein | chr1:17328856-17330343 FORWARD LENGTH=193	3e-72	83.98	NA	NA	NA	NA	NA	NA	PF00571	CBS domain	PTHR11911 PTHR11911:SF26	INOSINE-5-MONOPHOSPHATE DEHYDROGENASE RELATED; SUBFAMILY NOT NAMED	NA	NA	NA	NA	NA	NA
Glyma06g03460	86	UniRef100_C6TL35 Uncharacterized protein n=1 Tax=Glycine max RepID=C6TL35_SOYBN	3e-55	98.84	UniRef100_Q1A173 Protein RADIALIS-like 6 n=1 Tax=Arabidopsis thaliana RepID=RADL6_ARATH	6e-22	95.35	AT1G75250.2 | Symbols: ATRL6, RSM3, RL6 | RAD-like 6 | chr1:28244463-28245453 REVERSE LENGTH=97	1e-24	95.35	GO:0006355	regulation of transcription, DNA-dependent	GO:0003677 GO:0003700	DNA binding; sequence-specific DNA binding transcription factor activity	GO:0005634 GO:0009507	nucleus; chloroplast	PF00249	Myb-like DNA-binding domain	PTHR25040 PTHR25040:SF29	FAMILY NOT NAMED; SUBFAMILY NOT NAMED	NA	NA	NA	NA	NA	NA
Glyma06g03470	352	UniRef100_I1K7R5 Uncharacterized protein n=1 Tax=Glycine max RepID=I1K7R5_SOYBN	0	99.72	UniRef100_B9R7V3 DNA-3-methyladenine glycosylase, putative n=1 Tax=Ricinus communis RepID=B9R7V3_RICCO	1e-179	96.31	AT1G75230.1 | Symbols: | DNA glycosylase superfamily protein | chr1:28234444-28236452 FORWARD LENGTH=391	8e-148	93.75	GO:0006281 GO:0006284	DNA repair; base-excision repair	GO:0003824	catalytic activity	GO:0005634	nucleus	PF00730	HhH-GPD superfamily base excision DNA repair protein	NA	NA	KOG1918	3-methyladenine_DNA_glycosidase	3.2.2.21	DNA-3-methyladenine_glycosylase_II	K01247	DNA-3-methyladenine_glycosylase_II_[EC:3.2.2.21]
Glyma06g03500	642	UniRef100_I1K7R7 Uncharacterized protein n=1 Tax=Glycine max RepID=I1K7R7_SOYBN	0	99.84	UniRef100_B9R7U4 Cytosolic purine 5-nucleotidase, putative n=1 Tax=Ricinus communis RepID=B9R7U4_RICCO	0	81.31	AT1G75210.1 | Symbols: | HAD-superfamily hydrolase, subfamily IG, 5'-nucleotidase | chr1:28223990-28228751 FORWARD LENGTH=642	0	93.77	GO:0008150	biological process	GO:0008253	5'-nucleotidase activity	GO:0009507	chloroplast	PF05761	5' nucleotidase family	PTHR12103 PTHR12103:SF1	CYTOSOLIC PURINE 5-NUCLEOTIDASE-RELATED; UNCHARACTERIZED	KOG2469	IMP-GMP_specific_5'-nucleotidase	NA	NA	NA	NA
Glyma06g03510	231	UniRef100_I1K7R8 Uncharacterized protein n=1 Tax=Glycine max RepID=I1K7R8_SOYBN	4e-162	99.57	UniRef100_Q10E11 Expressed protein n=1 Tax=Oryza sativa Japonica Group RepID=Q10E11_ORYSJ	8e-50	72.29	AT5G42765.1 | Symbols: | INVOLVED IN: biological_process unknown; LOCATED IN: thylakoid, chloroplast thylakoid membrane, chloroplast; EXPRESSED IN: 22 plant structures; EXPRESSED DURING: 13 growth stages; CONTAINS InterPro DOMAIN/s: Twin-arginine translocation pathway, signal sequence (InterPro:IPR006311); Has 30201 Blast hits to 17322 proteins in 780 species: Archae - 12; Bacteria - 1396; Metazo…	3e-72	73.16	GO:0008150	biological process	NA	NA	GO:0009507 GO:0009535 GO:0009579	chloroplast; chloroplast thylakoid membrane; thylakoid	NA	NA	NA	NA	NA	NA	NA	NA	NA	NA
Glyma06g03520	348	UniRef100_I1K7S0 Uncharacterized protein n=1 Tax=Glycine max RepID=I1K7S0_SOYBN	0	99.71	UniRef100_F4K327 Leucine carboxyl methyltransferase n=3 Tax=Arabidopsis thaliana RepID=F4K327_ARATH	3e-161	91.95	AT5G42760.1 | Symbols: | Leucine carboxyl methyltransferase | chr5:17148953-17150105 FORWARD LENGTH=348	6e-164	91.95	NA	NA	GO:0008168	methyltransferase activity	GO:0005634	nucleus	PF04072	Leucine carboxyl methyltransferase	NA	NA	NA	NA	NA	NA	NA	NA
Glyma06g03530	488	UniRef100_I1K7S1 Uncharacterized protein n=1 Tax=Glycine max RepID=I1K7S1_SOYBN	0	99.8	UniRef100_E4MXR8 mRNA, clone: RTFL01-28-M03 n=1 Tax=Eutrema halophilum RepID=E4MXR8_THEHA	0	97.13	AT1G47330.1 | Symbols: | CBS domain-containing protein with a domain of unknown function (DUF21) | chr1:17351149-17353739 FORWARD LENGTH=527	0	97.13	GO:0008150	biological process	GO:0003674	molecular function	GO:0005886	plasma membrane	PF01595	Domain of unknown function DUF21	PTHR12064	ANCIENT CONSERVED DOMAIN PROTEIN-RELATED	KOG2118	Predicted_membrane_protein,_contains_two_CBS_domains	NA	NA	NA	NA
Glyma06g03540	124	UniRef100_I1K7S2 Uncharacterized protein n=1 Tax=Glycine max RepID=I1K7S2_SOYBN	2e-76	99.19	NA	NA	NA	NA	NA	NA	NA	NA	NA	NA	NA	NA	NA	NA	NA	NA	NA	NA	NA	NA	NA	NA
Glyma06g03560	408	UniRef100_UPI0002339A64 UPI0002339A64 related cluster n=1 Tax=unknown RepID=UPI0002339A64	0	94.61	UniRef100_I1K7S4 Glucose-6-phosphate isomerase n=1 Tax=Glycine max RepID=I1K7S4_SOYBN	1e-127	48.77	AT5G42740.1 | Symbols: | Sugar isomerase (SIS) family protein | chr5:17136080-17140622 FORWARD LENGTH=560	3e-116	49.26	GO:0006094 GO:0006096 GO:0009744 GO:0009813 GO:0009817 GO:0010224 GO:0046686	gluconeogenesis; glycolysis; response to sucrose stimulus; flavonoid biosynthetic process; defense response to fungus, incompatible interaction; response to UV-B; response to cadmium ion	GO:0004347	glucose-6-phosphate isomerase activity	GO:0005737 GO:0005829	cytoplasm; cytosol	PF00342	Phosphoglucose isomerase	PTHR11469	GLUCOSE-6-PHOSPHATE ISOMERASE	NA	NA	NA	NA	NA	NA
Glyma06g03570	1874	UniRef100_UPI0002339A65 UPI0002339A65 related cluster n=1 Tax=unknown RepID=UPI0002339A65	0	94.5	UniRef100_Q9FMM3 GYF domain-containing protein n=1 Tax=Arabidopsis thaliana RepID=Q9FMM3_ARATH	0	94.66	AT5G42950.1 | Symbols: | GYF domain-containing protein | chr5:17224436-17231044 FORWARD LENGTH=1714	0	94.66	GO:0009737	response to abscisic acid stimulus	GO:0003674	molecular function	GO:0009507	chloroplast	PF02213	GYF domain	PTHR14445 PTHR14445:SF24	GRB10 INTERACTING GYF PROTEIN; SUBFAMILY NOT NAMED	KOG1862	GYF_domain_containing_proteins	NA	NA	NA	NA
Glyma06g03590	383	UniRef100_I1K7S6 Uncharacterized protein n=1 Tax=Glycine max RepID=I1K7S6_SOYBN	0	99.74	UniRef100_Q9FYX1 BAC19.5 n=1 Tax=Solanum lycopersicum RepID=Q9FYX1_SOLLC	4e-149	96.87	AT1G75160.1 | Symbols: | Protein of unknown function (DUF620) | chr1:28209534-28211624 FORWARD LENGTH=395	8e-172	97.13	GO:0008150 GO:0048610 GO:0048868	biological process; cellular process involved in reproduction; pollen tube development	GO:0003674	molecular function	GO:0005634	nucleus	PF04788	Protein of unknown function (DUF620)	NA	NA	NA	NA	NA	NA	NA	NA
Glyma06g03600	253	UniRef100_I1K7S7 Uncharacterized protein n=1 Tax=Glycine max RepID=I1K7S7_SOYBN	1e-161	89.33	UniRef100_Q8GSM4 Ovate protein n=2 Tax=Solanum lycopersicum RepID=Q8GSM4_SOLLC	5e-28	30.43	AT2G18500.1 | Symbols: ATOFP7, OFP7 | ovate family protein 7 | chr2:8027102-8028049 FORWARD LENGTH=315	2e-25	92.49	GO:0045892	negative regulation of transcription, DNA-dependent	NA	NA	GO:0005634 GO:0005886	nucleus; plasma membrane	PF04844	Protein of unknown function, DUF623	NA	NA	NA	NA	NA	NA	NA	NA
Glyma06g03610	718	UniRef100_UPI0002339A67 UPI0002339A67 related cluster n=1 Tax=unknown RepID=UPI0002339A67	0	99.86	UniRef100_Q6ATQ3 Expressed protein n=1 Tax=Oryza sativa Japonica Group RepID=Q6ATQ3_ORYSJ	7e-48	51.53	AT1G75150.1 | Symbols: | unknown protein; Has 38228 Blast hits to 24529 proteins in 1168 species: Archae - 169; Bacteria - 4103; Metazoa - 14594; Fungi - 5866; Plants - 1861; Viruses - 317; Other Eukaryotes - 11318 (source: NCBI BLink). | chr1:28204709-28208512 REVERSE LENGTH=784	5e-74	97.49	GO:0006270 GO:0006275 GO:0006346 GO:0008150 GO:0016246 GO:0051726	DNA replication initiation; regulation of DNA replication; methylation-dependent chromatin silencing; biological process; RNA interference; regulation of cell cycle	GO:0003674	molecular function	GO:0005634	nucleus	NA	NA	NA	NA	NA	NA	NA	NA	NA	NA
Glyma06g03620	650	UniRef100_I1K7S9 Uncharacterized protein n=1 Tax=Glycine max RepID=I1K7S9_SOYBN	0	99.85	UniRef100_Q9MAJ5 F27F5.22 n=1 Tax=Arabidopsis thaliana RepID=Q9MAJ5_ARATH	0	97.69	AT1G45150.1 | Symbols: | unknown protein; Has 219 Blast hits to 202 proteins in 78 species: Archae - 0; Bacteria - 166; Metazoa - 0; Fungi - 0; Plants - 36; Viruses - 0; Other Eukaryotes - 17 (source: NCBI BLink). | chr1:17077615-17082330 REVERSE LENGTH=643	0	99.69	GO:0008150 GO:0045892	biological process; negative regulation of transcription, DNA-dependent	GO:0003674	molecular function	GO:0005634	nucleus	NA	NA	NA	NA	NA	NA	NA	NA	NA	NA
Glyma06g03630	470	UniRef100_UPI0002339A68 UPI0002339A68 related cluster n=1 Tax=unknown RepID=UPI0002339A68	0	99.79	UniRef100_B9R7R3 Nucleic acid binding protein, putative n=1 Tax=Ricinus communis RepID=B9R7R3_RICCO	2e-151	92.77	AT5G66730.1 | Symbols: | C2H2-like zinc finger protein | chr5:26641914-26643883 REVERSE LENGTH=500	5e-128	90.64	GO:0006355 GO:0009937 GO:0010029 GO:0010431	regulation of transcription, DNA-dependent; regulation of gibberellic acid mediated signaling pathway; regulation of seed germination; seed maturation	GO:0003676 GO:0003700 GO:0005515 GO:0008270	nucleic acid binding; sequence-specific DNA binding transcription factor activity; protein binding; zinc ion binding	GO:0005622 GO:0005634	intracellular; nucleus	PF12171	Zinc-finger double-stranded RNA-binding	PTHR10593	SERINE/THREONINE-PROTEIN KINASE RIO	NA	NA	NA	NA	NA	NA
Glyma06g03640	143	UniRef100_I1K7T2 Uncharacterized protein n=1 Tax=Glycine max RepID=I1K7T2_SOYBN	2e-101	99.3	UniRef100_A1XJ47 Actin depolymerizing factor 4 n=1 Tax=Gossypium hirsutum RepID=A1XJ47_GOSHI	4e-87	96.5	AT2G31200.1 | Symbols: ADF6, ATADF6 | actin depolymerizing factor 6 | chr2:13294171-13294948 FORWARD LENGTH=146	7e-81	95.8	GO:0008150	biological process	GO:0003779	actin binding	GO:0005622 GO:0005737	intracellular; cytoplasm	PF00241	Cofilin/tropomyosin-type actin-binding protein	PTHR11913	ACTIN DEPOLYMERIZING FACTOR	KOG1735	Actin_depolymerizing_factor	NA	NA	NA	NA
Glyma06g03650	569	UniRef100_UPI0002339A6A UPI0002339A6A related cluster n=1 Tax=unknown RepID=UPI0002339A6A	0	97.19	UniRef100_D7M078 Pentatricopeptide repeat-containing protein n=1 Tax=Arabidopsis lyrata subsp. lyrata RepID=D7M078_ARALL	0	97.01	AT4G11690.1 | Symbols: | Pentatricopeptide repeat (PPR-like) superfamily protein | chr4:7056254-7057954 FORWARD LENGTH=566	0	97.01	GO:0008150	biological process	NA	NA	GO:0005739	mitochondrion	PF01535	PPR repeat	PTHR24015	FAMILY NOT NAMED	NA	NA	NA	NA	NA	NA
Glyma06g03660	445	UniRef100_UPI00018C6C6F UPI00018C6C6F related cluster n=1 Tax=unknown RepID=UPI00018C6C6F	0	99.78	UniRef100_G8A053 Basic 7S globulin n=1 Tax=Medicago truncatula RepID=G8A053_MEDTR	8e-102	90.79	AT1G03220.1 | Symbols: | Eukaryotic aspartyl protease family protein | chr1:787143-788444 FORWARD LENGTH=433	1e-76	96.63	GO:0006508 GO:0009651	proteolysis; response to salt stress	GO:0004190	aspartic-type endopeptidase activity	GO:0005576 GO:0005618 GO:0005794 GO:0005886 GO:0009505 GO:0009506 GO:0016020	extracellular region; cell wall; Golgi apparatus; plasma membrane; plant-type cell wall; plasmodesma; membrane	NA	NA	PTHR13683 PTHR13683:SF100	ASPARTYL PROTEASES; BASIC 7S GLOBULIN-RELATED	KOG1339	Aspartyl_protease	NA	NA	NA	NA
Glyma06g03670	721	UniRef100_UPI0002339A6B UPI0002339A6B related cluster n=1 Tax=unknown RepID=UPI0002339A6B	0	99.86	UniRef100_B9R7Q9 Heat shock protein binding protein, putative n=1 Tax=Ricinus communis RepID=B9R7Q9_RICCO	3e-120	99.86	AT1G75100.1 | Symbols: JAC1 | J-domain protein required for chloroplast accumulation response 1 | chr1:28191108-28193769 REVERSE LENGTH=651	9e-70	98.61	GO:0009904	chloroplast accumulation movement	GO:0031072	heat shock protein binding	GO:0005737 GO:0009507	cytoplasm; chloroplast	NA	NA	PTHR23172 PTHR23172:SF32	AUXILIN/CYCLIN G-ASSOCIATED KINASE-RELATED; ; ;	KOG0431	Auxilin-like_protein_and_related_proteins_containing_DnaJ_domain	NA	NA	NA	NA
Glyma06g03680	379	UniRef100_I1K7T6 Uncharacterized protein n=1 Tax=Glycine max RepID=I1K7T6_SOYBN	0	99.74	UniRef100_G7KQU5 1-acyl-sn-glycerol-3-phosphate acyltransferase n=1 Tax=Medicago truncatula RepID=G7KQU5_MEDTR	0	99.74	AT1G80950.1 | Symbols: | Phospholipid/glycerol acyltransferase family protein | chr1:30412653-30414935 REVERSE LENGTH=398	8e-178	99.74	GO:0006655 GO:0008152	phosphatidylglycerol biosynthetic process; metabolic process	GO:0016746	transferase activity, transferring acyl groups	GO:0005634 GO:0005783	nucleus; endoplasmic reticulum	PF01553	Acyltransferase	PTHR23063	ACETYLTRANSFERASE-RELATED	KOG4666	Predicted_phosphate_acyltransferase,_contains_PlsC_domain	2.3.1.67 2.3.1.23	1-alkylglycerophosphocholine_O-acetyltransferase. 1-acylglycerophosphocholine_O-acyltransferase	K13510	lysophosphatidylcholine_acyltransferase_/_lyso-PAF_acetyltransferase_[EC:2.3.1.23_2.3.1.67]
Glyma06g03690	310	UniRef100_I1K7T9 Uncharacterized protein n=1 Tax=Glycine max RepID=I1K7T9_SOYBN	0	99.68	UniRef100_B9R7Q5 DNA-3-methyladenine glycosylase, putative n=1 Tax=Ricinus communis RepID=B9R7Q5_RICCO	2e-123	99.03	AT1G75090.1 | Symbols: | DNA glycosylase superfamily protein | chr1:28187647-28189612 REVERSE LENGTH=329	1e-113	98.71	GO:0006281 GO:0006284 GO:0006306	DNA repair; base-excision repair; DNA methylation	GO:0003824 GO:0008725	catalytic activity; DNA-3-methyladenine glycosylase activity	GO:0005634	nucleus	PF03352	Methyladenine glycosylase	NA	NA	NA	NA	3.2.2.20	DNA-3-methyladenine_glycosylase_I	K01246	DNA-3-methyladenine_glycosylase_I_[EC:3.2.2.20]
Glyma06g03700	321	UniRef100_I1K7U0 Uncharacterized protein n=1 Tax=Glycine max RepID=I1K7U0_SOYBN	0	99.69	UniRef100_B9R7Q4 BRASSINAZOLE-RESISTANT 1 protein, putative n=1 Tax=Ricinus communis RepID=B9R7Q4_RICCO	1e-130	98.75	AT1G75080.2 | Symbols: BZR1 | Brassinosteroid signalling positive regulator (BZR1) family protein | chr1:28185709-28187063 FORWARD LENGTH=336	4e-119	98.75	GO:0006355 GO:0009742 GO:0045892 GO:0048316 GO:0048481	regulation of transcription, DNA-dependent; brassinosteroid mediated signaling pathway; negative regulation of transcription, DNA-dependent; seed development; ovule development	GO:0003677 GO:0003700 GO:0005515	DNA binding; sequence-specific DNA binding transcription factor activity; protein binding	GO:0005634 GO:0005829	nucleus; cytosol	PF05687	Plant protein of unknown function (DUF822)	NA	NA	NA	NA	NA	NA	K14503	brassinosteroid_resistant_1/2
Glyma06g03710	224	UniRef100_C6TGL7 Putative uncharacterized protein n=1 Tax=Glycine max RepID=C6TGL7_SOYBN	1e-159	99.55	UniRef100_Q9LN65 F18O14.5 n=1 Tax=Arabidopsis thaliana RepID=Q9LN65_ARATH	6e-112	99.55	AT1G19330.2 | Symbols: | unknown protein; FUNCTIONS IN: molecular_function unknown; INVOLVED IN: biological_process unknown; LOCATED IN: cellular_component unknown; EXPRESSED IN: 22 plant structures; EXPRESSED DURING: 13 growth stages; BEST Arabidopsis thaliana protein match is: unknown protein (TAIR:AT1G75060.1); Has 145 Blast hits to 145 proteins in 43 species: Archae - 0; Bacteria - 0; Metazoa…	1e-114	99.55	GO:0008150	biological process	GO:0003674	molecular function	GO:0005634	nucleus	NA	NA	PTHR13286 PTHR13286:SF4	SAP30; SUBFAMILY NOT NAMED	NA	NA	NA	NA	NA	NA
Glyma06g03720	224	UniRef100_I1K7U1 Uncharacterized protein n=1 Tax=Glycine max RepID=I1K7U1_SOYBN	3e-163	99.55	UniRef100_Q9LN65 F18O14.5 n=1 Tax=Arabidopsis thaliana RepID=Q9LN65_ARATH	9e-110	99.55	AT1G19330.2 | Symbols: | unknown protein; FUNCTIONS IN: molecular_function unknown; INVOLVED IN: biological_process unknown; LOCATED IN: cellular_component unknown; EXPRESSED IN: 22 plant structures; EXPRESSED DURING: 13 growth stages; BEST Arabidopsis thaliana protein match is: unknown protein (TAIR:AT1G75060.1); Has 145 Blast hits to 145 proteins in 43 species: Archae - 0; Bacteria - 0; Metazoa…	2e-112	99.55	GO:0008150	biological process	GO:0003674	molecular function	GO:0005634	nucleus	NA	NA	PTHR13286 PTHR13286:SF4	SAP30; SUBFAMILY NOT NAMED	NA	NA	NA	NA	NA	NA
Glyma06g03740	860	UniRef100_I1JTD8 Uncharacterized protein n=1 Tax=Glycine max RepID=I1JTD8_SOYBN	0	99.88	UniRef100_B9R7P8 Metalloendopeptidase, putative n=1 Tax=Ricinus communis RepID=B9R7P8_RICCO	0	97.44	AT5G42620.2 | Symbols: | metalloendopeptidases;zinc ion binding | chr5:17066630-17071766 FORWARD LENGTH=889	0	99.77	GO:0006508 GO:0007155	proteolysis; cell adhesion	GO:0004222 GO:0008270	metalloendopeptidase activity; zinc ion binding	GO:0005886 GO:0016020	plasma membrane; membrane	PF07974 PF01457	EGF-like domain; Leishmanolysin	PTHR10942	PROTEASE FAMILY M8 LEISHMANOLYSIN	KOG2556	Leishmanolysin-like_peptidase_(Peptidase_M8_family)	3.4.24.36	Leishmanolysin	K01404	leishmanolysin_[EC:3.4.24.36]
Glyma06g03760	232	UniRef100_I1K7U3 Uncharacterized protein n=1 Tax=Glycine max RepID=I1K7U3_SOYBN	4e-169	99.57	UniRef100_B9R7P4 Rnf5, putative n=1 Tax=Ricinus communis RepID=B9R7P4_RICCO	2e-113	99.14	AT1G19310.1 | Symbols: | RING/U-box superfamily protein | chr1:6676424-6677104 REVERSE LENGTH=226	2e-84	79.74	NA	NA	GO:0008270	zinc ion binding	GO:0005634	nucleus	PF00097	Zinc finger, C3HC4 type (RING finger)	PTHR12313	RNF5	KOG0823	Predicted_E3_ubiquitin_ligase	NA	NA	NA	NA
Glyma06g03770	367	UniRef100_I1K7U4 Uncharacterized protein n=1 Tax=Glycine max RepID=I1K7U4_SOYBN	0	99.73	UniRef100_D0ECQ6 Glycosyltransferase family GT8 protein n=1 Tax=Populus deltoides RepID=D0ECQ6_POPDE	0	88.28	AT1G19300.1 | Symbols: GATL1, PARVUS, GLZ1, ATGATL1 | Nucleotide-diphospho-sugar transferases superfamily protein | chr1:6671451-6672506 REVERSE LENGTH=351	6e-177	89.1	GO:0006569 GO:0006612 GO:0009684 GO:0009863 GO:0009867 GO:0010051 GO:0010363 GO:0010417 GO:0016051 GO:0019344 GO:0032504 GO:0048366 GO:0052386	tryptophan catabolic process; protein targeting to membrane; indoleacetic acid biosynthetic process; salicylic acid mediated signaling pathway; jasmonic acid mediated signaling pathway; xylem and phloem pattern formation; regulation of plant-type hypersensitive response; glucuronoxylan biosynthetic process; carbohydrate biosynthetic process; cysteine biosynthetic process; multicellular organism r…	GO:0016757 GO:0016758 GO:0047262	transferase activity, transferring glycosyl groups; transferase activity, transferring hexosyl groups; polygalacturonate 4-alpha-galacturonosyltransferase activity	GO:0005783	endoplasmic reticulum	PF01501	Glycosyl transferase family 8	PTHR13778	GLYCOSYL TRANSFERASE-RELATED	NA	NA	NA	NA	NA	NA
Glyma06g03780	188	UniRef100_I1K7U5 Uncharacterized protein n=1 Tax=Glycine max RepID=I1K7U5_SOYBN	2e-132	99.47	UniRef100_B9T4V6 Calmodulin, putative n=1 Tax=Ricinus communis RepID=B9T4V6_RICCO	6e-52	96.81	AT3G50770.1 | Symbols: CML41 | calmodulin-like 41 | chr3:18873987-18874604 FORWARD LENGTH=205	2e-47	81.91	GO:0008150 GO:0043090	biological process; amino acid import	GO:0005509	calcium ion binding	NA	NA	PF00036	EF hand	PTHR10891	CALMODULIN	KOG0027	Calmodulin_and_related_proteins_(EF-Hand_superfamily)	NA	NA	K13448	calcium-binding_protein_CML
Glyma06g03790	234	UniRef100_I1K7U8 Uncharacterized protein n=1 Tax=Glycine max RepID=I1K7U8_SOYBN	8e-169	99.57	UniRef100_G5DXJ6 Beta-1,4-N-acetylglucosaminyltransferase (Fragment) n=1 Tax=Silene latifolia RepID=G5DXJ6_SILLA	1e-98	85.47	AT4G18230.1 | Symbols: | FUNCTIONS IN: molecular_function unknown; INVOLVED IN: biological_process unknown; LOCATED IN: endomembrane system; EXPRESSED IN: 23 plant structures; EXPRESSED DURING: 13 growth stages; CONTAINS InterPro DOMAIN/s: Oligosaccharide biosynthesis protein Alg14 like (InterPro:IPR013969); Has 640 Blast hits to 640 proteins in 277 species: Archae - 4; Bacteria - 281; Metazoa - …	2e-98	99.57	GO:0008150	biological process	GO:0003674	molecular function	GO:0005739	mitochondrion	PF08660	Oligosaccharide biosynthesis protein Alg14 like	PTHR12154	GLYCOSYL TRANSFERASE-RELATED	KOG3339	Predicted_glycosyltransferase	NA	NA	NA	NA
Glyma06g03820	357	UniRef100_I1K7V1 Uncharacterized protein n=1 Tax=Glycine max RepID=I1K7V1_SOYBN	0	99.72	UniRef100_Q9LP79 T1N15.7 n=1 Tax=Arabidopsis thaliana RepID=Q9LP79_ARATH	3e-107	84.59	AT1G48460.1 | Symbols: | unknown protein; FUNCTIONS IN: molecular_function unknown; INVOLVED IN: biological_process unknown; LOCATED IN: chloroplast envelope; EXPRESSED IN: 21 plant structures; EXPRESSED DURING: 13 growth stages; BEST Arabidopsis thaliana protein match is: unknown protein (TAIR:AT5G63040.1); Has 60 Blast hits to 60 proteins in 14 species: Archae - 0; Bacteria - 0; Metazoa - 0; Fu…	5e-112	84.59	GO:0008150	biological process	GO:0003674	molecular function	GO:0005739 GO:0009536 GO:0009941	mitochondrion; plastid; chloroplast envelope	NA	NA	NA	NA	NA	NA	NA	NA	NA	NA
Glyma06g03830	710	UniRef100_I1K7V3 Uncharacterized protein n=2 Tax=Glycine max RepID=I1K7V3_SOYBN	0	88.31	UniRef100_B9S8Q9 Kinase, putative n=1 Tax=Ricinus communis RepID=B9S8Q9_RICCO	0	97.04	AT2G23450.1 | Symbols: | Protein kinase superfamily protein | chr2:9988926-9991244 REVERSE LENGTH=708	0	97.61	GO:0006468	protein phosphorylation	GO:0004672 GO:0004674 GO:0005524 GO:0016301 GO:0016772	protein kinase activity; protein serine/threonine kinase activity; ATP binding; kinase activity; transferase activity, transferring phosphorus-containing groups	GO:0005575	cellular component	PF00069	Protein kinase domain	PTHR24420 PTHR24420:SF852	FAMILY NOT NAMED;	KOG1187	Serine/threonine_protein_kinase	NA	NA	NA	NA
Glyma06g03850	536	UniRef100_I1K7V4 Uncharacterized protein n=1 Tax=Glycine max RepID=I1K7V4_SOYBN	0	99.81	UniRef100_B9NBP7 Cytochrome P450 n=1 Tax=Populus trichocarpa RepID=B9NBP7_POPTR	0	98.51	AT4G31940.1 | Symbols: CYP82C4 | cytochrome P450, family 82, subfamily C, polypeptide 4 | chr4:15452040-15453966 FORWARD LENGTH=524	3e-174	97.2	GO:0010043 GO:0055114 GO:0071281	response to zinc ion; oxidation-reduction process; cellular response to iron ion	GO:0004497 GO:0005506 GO:0009055 GO:0016705 GO:0019825 GO:0020037	monooxygenase activity; iron ion binding; electron carrier activity; oxidoreductase activity, acting on paired donors, with incorporation or reduction of molecular oxygen; oxygen binding; heme binding	GO:0009507	chloroplast	PF00067	Cytochrome P450	PTHR24298 PTHR24298:SF44	FAMILY NOT NAMED;	KOG0156	Cytochrome_P450_CYP2_subfamily	NA	NA	NA	NA
Glyma06g03860	542	UniRef100_I1K7V5 Uncharacterized protein n=1 Tax=Glycine max RepID=I1K7V5_SOYBN	0	96.68	UniRef100_B9NBP7 Cytochrome P450 n=1 Tax=Populus trichocarpa RepID=B9NBP7_POPTR	0	92.44	AT4G31940.1 | Symbols: CYP82C4 | cytochrome P450, family 82, subfamily C, polypeptide 4 | chr4:15452040-15453966 FORWARD LENGTH=524	1e-175	92.8	GO:0010043 GO:0055114 GO:0071281	response to zinc ion; oxidation-reduction process; cellular response to iron ion	GO:0004497 GO:0005506 GO:0009055 GO:0016705 GO:0019825 GO:0020037	monooxygenase activity; iron ion binding; electron carrier activity; oxidoreductase activity, acting on paired donors, with incorporation or reduction of molecular oxygen; oxygen binding; heme binding	GO:0009507	chloroplast	PF00067	Cytochrome P450	PTHR24298	FAMILY NOT NAMED	KOG0156	Cytochrome_P450_CYP2_subfamily	NA	NA	NA	NA
Glyma06g03870	103	UniRef100_I1K7V6 Uncharacterized protein n=1 Tax=Glycine max RepID=I1K7V6_SOYBN	2e-68	99.03	NA	NA	NA	NA	NA	NA	NA	NA	NA	NA	NA	NA	NA	NA	NA	NA	NA	NA	NA	NA	NA	NA
Glyma06g03880	532	UniRef100_UPI0002339BC3 UPI0002339BC3 related cluster n=1 Tax=unknown RepID=UPI0002339BC3	0	99.81	UniRef100_B9MVH7 Cytochrome P450 n=1 Tax=Populus trichocarpa RepID=B9MVH7_POPTR	0	94.92	AT4G31940.1 | Symbols: CYP82C4 | cytochrome P450, family 82, subfamily C, polypeptide 4 | chr4:15452040-15453966 FORWARD LENGTH=524	2e-175	96.24	GO:0010043 GO:0055114 GO:0071281	response to zinc ion; oxidation-reduction process; cellular response to iron ion	GO:0004497 GO:0005506 GO:0009055 GO:0016705 GO:0019825 GO:0020037	monooxygenase activity; iron ion binding; electron carrier activity; oxidoreductase activity, acting on paired donors, with incorporation or reduction of molecular oxygen; oxygen binding; heme binding	GO:0009507	chloroplast	PF00067	Cytochrome P450	PTHR24298 PTHR24298:SF44	FAMILY NOT NAMED;	KOG0156	Cytochrome_P450_CYP2_subfamily	NA	NA	NA	NA
Glyma06g03910	229	UniRef100_C6T008 Uncharacterized protein n=2 Tax=Glycine max RepID=C6T008_SOYBN	6e-165	99.56	UniRef100_G7J5Q0 Transmembrane protein n=1 Tax=Medicago truncatula RepID=G7J5Q0_MEDTR	1e-160	99.13	AT1G47640.1 | Symbols: | unknown protein; FUNCTIONS IN: molecular_function unknown; INVOLVED IN: biological_process unknown; LOCATED IN: mitochondrion; EXPRESSED IN: 23 plant structures; EXPRESSED DURING: 13 growth stages; CONTAINS InterPro DOMAIN/s: Protein of unknown function DUF2053, membrane (InterPro:IPR019164); Has 204 Blast hits to 204 proteins in 84 species: Archae - 0; Bacteria - 0; Meta…	4e-149	99.56	GO:0008150	biological process	GO:0003674	molecular function	GO:0005739 GO:0005794 GO:0009507	mitochondrion; Golgi apparatus; chloroplast	PF09767	Predicted membrane protein (DUF2053)	PTHR12869	SMALL SEVEN TRANSMEMBRANE DOMAIN-CONTAINING PROTEIN	KOG3236	Predicted_membrane_protein	NA	NA	NA	NA
Glyma06g03920	123	UniRef100_C6T1C6 Uncharacterized protein n=1 Tax=Glycine max RepID=C6T1C6_SOYBN	3e-78	99.19	UniRef100_B9R7K1 Plastoquinol-plastocyanin reductase, putative n=1 Tax=Ricinus communis RepID=B9R7K1_RICCO	2e-42	81.3	AT2G26500.1 | Symbols: | cytochrome b6f complex subunit (petM), putative | chr2:11270370-11270747 FORWARD LENGTH=125	9e-35	80.49	GO:0006364 GO:0009657 GO:0010207	rRNA processing; plastid organization; photosystem II assembly	GO:0009496	plastoquinol--plastocyanin reductase activity	GO:0009507 GO:0009512 GO:0009535	chloroplast; cytochrome b6f complex; chloroplast thylakoid membrane	PF08041	PetM family of cytochrome b6f complex subunit 7	NA	NA	NA	NA	NA	NA	NA	NA
Glyma06g03930	494	UniRef100_I1K7W1 Uncharacterized protein (Fragment) n=1 Tax=Glycine max RepID=I1K7W1_SOYBN	0	77.33	UniRef100_G7J5Q1 Serine/threonine protein kinase BRI1-like protein n=1 Tax=Medicago truncatula RepID=G7J5Q1_MEDTR	0	75.3	AT2G15880.1 | Symbols: | Leucine-rich repeat (LRR) family protein | chr2:6918039-6920319 REVERSE LENGTH=727	2e-158	83.2	NA	NA	GO:0005199	structural constituent of cell wall	GO:0005634	nucleus	NA	NA	PTHR24420 PTHR24420:SF665	FAMILY NOT NAMED;	NA	NA	NA	NA	NA	NA
Glyma06g03940	305	UniRef100_I1K7W3 Uncharacterized protein n=1 Tax=Glycine max RepID=I1K7W3_SOYBN	0	99.67	UniRef100_G7J5Q2 Thylakoidal processing peptidase n=2 Tax=Medicago truncatula RepID=G7J5Q2_MEDTR	2e-136	96.72	AT1G06870.1 | Symbols: | Peptidase S24/S26A/S26B/S26C family protein | chr1:2108832-2110642 FORWARD LENGTH=367	4e-93	96.07	GO:0006508	proteolysis	GO:0008233 GO:0008236	peptidase activity; serine-type peptidase activity	GO:0009507 GO:0016020 GO:0016021	chloroplast; membrane; integral to membrane	PF00717	Peptidase S24-like	PTHR12383 PTHR12383:SF1	PROTEASE FAMILY S26 MITOCHONDRIAL INNER MEMBRANE PROTEASE-RELATED; MITOCHONDRIAL INNER MEMBRANE PROTEASE	NA	NA	NA	NA	NA	NA
Glyma06g03950	573	UniRef100_UPI0002339BC7 UPI0002339BC7 related cluster n=1 Tax=unknown RepID=UPI0002339BC7	0	94.94	UniRef100_G7J5Q5 Peptide transporter PTR3-A n=1 Tax=Medicago truncatula RepID=G7J5Q5_MEDTR	0	99.65	AT1G69850.1 | Symbols: ATNRT1:2, NTL1, NRT1:2 | nitrate transporter 1:2 | chr1:26296945-26300407 REVERSE LENGTH=585	2e-157	95.11	GO:0009624 GO:0010119 GO:0080168	response to nematode; regulation of stomatal movement; abscisic acid transport	GO:0005215 GO:0005509 GO:0090440	transporter activity; calcium ion binding; abscisic acid transporter activity	GO:0005886 GO:0016020	plasma membrane; membrane	PF00854	POT family	PTHR11654 PTHR11654:SF21	OLIGOPEPTIDE TRANSPORTER-RELATED; NITRATE TRANSPORTER (NTL1)	KOG1237	H+/oligopeptide_symporter	NA	NA	NA	NA
Glyma06g03960	390	UniRef100_I1K7W5 Uncharacterized protein n=1 Tax=Glycine max RepID=I1K7W5_SOYBN	0	99.74	UniRef100_G7J5Q8 Serpin-like protein n=1 Tax=Medicago truncatula RepID=G7J5Q8_MEDTR	0	99.49	AT1G47710.1 | Symbols: | Serine protease inhibitor (SERPIN) family protein | chr1:17558271-17560061 FORWARD LENGTH=391	3e-168	98.97	GO:0010951 GO:0030162	negative regulation of endopeptidase activity; regulation of proteolysis	GO:0004867 GO:0004869	serine-type endopeptidase inhibitor activity; cysteine-type endopeptidase inhibitor activity	GO:0005576 GO:0048046	extracellular region; apoplast	PF00079	Serpin (serine protease inhibitor)	PTHR11461 PTHR11461:SF24	SERINE PROTEASE INHIBITORS, SERPINS; gb def: serpin [petromyzon marinus]	KOG2392	Serpin	NA	NA	NA	NA
Glyma06g03970	672	UniRef100_I1K7W6 Uncharacterized protein n=1 Tax=Glycine max RepID=I1K7W6_SOYBN	0	99.85	UniRef100_G7J5S7 Mitogen-activated protein kinase kinase kinase n=1 Tax=Medicago truncatula RepID=G7J5S7_MEDTR	0	97.62	AT5G66850.1 | Symbols: MAPKKK5 | mitogen-activated protein kinase kinase kinase 5 | chr5:26695965-26699159 REVERSE LENGTH=716	2e-148	79.61	GO:0006468 GO:0046777	protein phosphorylation; protein autophosphorylation	GO:0004672 GO:0004674 GO:0005524 GO:0016301 GO:0016772	protein kinase activity; protein serine/threonine kinase activity; ATP binding; kinase activity; transferase activity, transferring phosphorus-containing groups	GO:0005886	plasma membrane	PF00069	Protein kinase domain	PTHR24361 PTHR24361:SF62	MITOGEN-ACTIVATED KINASE KINASE KINASE;	KOG0198	MEKK_and_related_serine/threonine_protein_kinases	NA	NA	NA	NA
Glyma06g03980	1003	UniRef100_UPI0002339BC9 UPI0002339BC9 related cluster n=1 Tax=unknown RepID=UPI0002339BC9	0	99.9	UniRef100_B9N3X7 Tubulin gamma complex-associated protein n=1 Tax=Populus trichocarpa RepID=B9N3X7_POPTR	0	99.2	AT1G80260.1 | Symbols: emb1427 | Spc97 / Spc98 family of spindle pole body (SBP) component | chr1:30175924-30180511 FORWARD LENGTH=995	0	97.01	GO:0000226 GO:0009793	microtubule cytoskeleton organization; embryo development ending in seed dormancy	GO:0015631	tubulin binding	GO:0000922 GO:0005815	spindle pole; microtubule organizing center	PF04130	Spc97 / Spc98 family	PTHR19302 PTHR19302:SF9	GAMMA TUBULIN COMPLEX PROTEIN; gb def: gamma-tubulin interacting protein-like [arabidopsis thaliana]	NA	NA	NA	NA	NA	NA
Glyma06g03990	122	UniRef100_I1K7W8 Uncharacterized protein n=1 Tax=Glycine max RepID=I1K7W8_SOYBN	1e-81	99.18	UniRef100_O48719 Expressed protein n=1 Tax=Arabidopsis thaliana RepID=O48719_ARATH	1e-20	67.21	AT2G26520.1 | Symbols: | unknown protein; BEST Arabidopsis thaliana protein match is: unknown protein (TAIR:AT3G57500.1); Has 51 Blast hits to 51 proteins in 11 species: Archae - 0; Bacteria - 1; Metazoa - 0; Fungi - 0; Plants - 50; Viruses - 0; Other Eukaryotes - 0 (source: NCBI BLink). | chr2:11280280-11280717 FORWARD LENGTH=145	2e-23	67.21	GO:0008150	biological process	GO:0003674	molecular function	GO:0005634	nucleus	NA	NA	NA	NA	NA	NA	NA	NA	NA	NA
Glyma06g04000	144	UniRef100_I1K7W9 Uncharacterized protein n=1 Tax=Glycine max RepID=I1K7W9_SOYBN	3e-101	99.31	UniRef100_B6TG98 Copper ion binding protein n=1 Tax=Zea mays RepID=B6TG98_MAIZE	7e-23	82.64	AT2G15770.1 | Symbols: | Cupredoxin superfamily protein | chr2:6871257-6872245 REVERSE LENGTH=301	2e-25	78.47	NA	NA	GO:0005507 GO:0009055	copper ion binding; electron carrier activity	GO:0005634	nucleus	PF02298	Plastocyanin-like domain	NA	NA	NA	NA	NA	NA	NA	NA
Glyma06g04010	222	UniRef100_Q0PJI9 MYB transcription factor MYB124 n=1 Tax=Glycine max RepID=Q0PJI9_SOYBN	1e-161	99.55	UniRef100_Q0PJI9 MYB transcription factor MYB124 n=1 Tax=Glycine max RepID=Q0PJI9_SOYBN	1e-161	99.55	AT3G50060.1 | Symbols: MYB77 | myb domain protein 77 | chr3:18558146-18559051 REVERSE LENGTH=301	2e-56	48.2	GO:0006355 GO:0009723 GO:0009751 GO:0010200 GO:0048527	regulation of transcription, DNA-dependent; response to ethylene stimulus; response to salicylic acid stimulus; response to chitin; lateral root development	GO:0003677 GO:0003700 GO:0005515	DNA binding; sequence-specific DNA binding transcription factor activity; protein binding	GO:0005634	nucleus	PF00249	Myb-like DNA-binding domain	PTHR10641	MYB-RELATED	NA	NA	NA	NA	NA	NA
Glyma06g04020	232	UniRef100_I1K7X1 Uncharacterized protein n=1 Tax=Glycine max RepID=I1K7X1_SOYBN	3e-170	99.57	UniRef100_B6U390 Plant-specific domain TIGR01570 family protein n=1 Tax=Zea mays RepID=B6U390_MAIZE	4e-76	98.71	AT5G42680.2 | Symbols: | Protein of unknown function, DUF617 | chr5:17114640-17115356 FORWARD LENGTH=238	4e-95	99.57	GO:0008150	biological process	GO:0003674	molecular function	GO:0009507	chloroplast	PF04759	Protein of unknown function, DUF617	NA	NA	NA	NA	NA	NA	NA	NA
Glyma06g04030	276	UniRef100_I1K7X2 Uncharacterized protein n=2 Tax=Glycine max RepID=I1K7X2_SOYBN	0	99.64	UniRef100_G7J5T8 Pheromone receptor-like protein n=1 Tax=Medicago truncatula RepID=G7J5T8_MEDTR	5e-87	99.28	AT2G26530.1 | Symbols: AR781 | Protein of unknown function (DUF1645) | chr2:11283036-11283989 REVERSE LENGTH=317	3e-35	97.83	GO:0006612 GO:0008150 GO:0009611 GO:0009612 GO:0009646 GO:0009863 GO:0009867 GO:0010200 GO:0010363	protein targeting to membrane; biological process; response to wounding; response to mechanical stimulus; response to absence of light; salicylic acid mediated signaling pathway; jasmonic acid mediated signaling pathway; response to chitin; regulation of plant-type hypersensitive response	GO:0003674	molecular function	GO:0005886 GO:0009507	plasma membrane; chloroplast	PF07816	Protein of unknown function (DUF1645)	NA	NA	NA	NA	NA	NA	NA	NA
Glyma06g04060	564	UniRef100_I1K7X3 Uncharacterized protein n=2 Tax=Glycine max RepID=I1K7X3_SOYBN	0	99.82	UniRef100_B9R7H5 Transcription factor, putative n=1 Tax=Ricinus communis RepID=B9R7H5_RICCO	0	96.1	AT4G37080.3 | Symbols: | Protein of unknown function, DUF547 | chr4:17473719-17476716 FORWARD LENGTH=610	2e-155	99.47	GO:0008150	biological process	GO:0003674	molecular function	GO:0005634	nucleus	PF04784	Protein of unknown function, DUF547	PTHR23054	UNCHARACTERIZED	NA	NA	NA	NA	NA	NA
Glyma06g04070	51	UniRef100_I1K7X6 Uncharacterized protein n=1 Tax=Glycine max RepID=I1K7X6_SOYBN	2e-25	98.04	NA	NA	NA	NA	NA	NA	NA	NA	NA	NA	NA	NA	NA	NA	NA	NA	NA	NA	NA	NA	NA	NA
Glyma06g04100	412	UniRef100_UPI0002338EBF UPI0002338EBF related cluster n=1 Tax=unknown RepID=UPI0002338EBF	0	99.76	UniRef100_B9R7H3 Nuclear acid binding protein, putative n=1 Tax=Ricinus communis RepID=B9R7H3_RICCO	0	94.66	AT1G47490.1 | Symbols: ATRBP47C, RBP47C | RNA-binding protein 47C | chr1:17424801-17427182 FORWARD LENGTH=432	1e-173	97.82	NA	NA	GO:0000166 GO:0003676 GO:0003723 GO:0008143	nucleotide binding; nucleic acid binding; RNA binding; poly(A) RNA binding	GO:0005634 GO:0005737 GO:0009507	nucleus; cytoplasm; chloroplast	PF00076	RNA recognition motif. (a.k.a. RRM, RBD, or RNP domain)	PTHR24012 PTHR24012:SF67	FAMILY NOT NAMED; SUBFAMILY NOT NAMED	KOG0148	Apoptosis-promoting_RNA-binding_protein_TIA-1/TIAR_(RRM_superfamily)	NA	NA	NA	NA
Glyma06g04110	110	UniRef100_C6T546 Uncharacterized protein n=1 Tax=Glycine max RepID=C6T546_SOYBN	2e-75	99.09	NA	NA	NA	NA	NA	NA	NA	NA	NA	NA	NA	NA	NA	NA	NA	NA	NA	NA	NA	NA	NA	NA
Glyma06g04120	313	UniRef100_I1K7X9 Uncharacterized protein n=1 Tax=Glycine max RepID=I1K7X9_SOYBN	0	98.4	UniRef100_F4JKP9 P-loop containing nucleoside triphosphate hydrolase family protein-like protein n=1 Tax=Arabidopsis thaliana RepID=F4JKP9_ARATH	7e-128	97.76	AT2G15730.1 | Symbols: | P-loop containing nucleoside triphosphate hydrolases superfamily protein | chr2:6849797-6851881 FORWARD LENGTH=344	3e-139	98.72	GO:0008150	biological process	GO:0003674	molecular function	GO:0005794	Golgi apparatus	NA	NA	NA	NA	NA	NA	NA	NA	NA	NA
Glyma06g04130	415	UniRef100_I1K7Y0 Uncharacterized protein (Fragment) n=2 Tax=Glycine max RepID=I1K7Y0_SOYBN	0	97.35	UniRef100_G7J6A9 Patatin-like protein n=1 Tax=Medicago truncatula RepID=G7J6A9_MEDTR	0	97.11	AT2G26560.1 | Symbols: PLP2, PLA IIA, PLA2A | phospholipase A 2A | chr2:11293912-11295708 REVERSE LENGTH=407	0	94.94	GO:0000165 GO:0002237 GO:0002679 GO:0006612 GO:0006629 GO:0006944 GO:0008152 GO:0008219 GO:0009595 GO:0009626 GO:0009646 GO:0009697 GO:0009723 GO:0009862 GO:0009863 GO:0009867 GO:0010200 GO:0010310 GO:0010363 GO:0031348 GO:0031408 GO:0042742 GO:0043069 GO:0043900 GO:0046686 GO:0050832 GO:0051607 GO:0051707 GO:0071456	MAPK cascade; response to molecule of bacterial origin; respiratory burst involved in defense response; protein targeting to membrane; lipid metabolic process; cellular membrane fusion; metabolic process; cell death; detection of biotic stimulus; plant-type hypersensitive response; response to absence of light; salicylic acid biosynthetic process; response to ethylene stimulus; systemic acquired …	GO:0016298 GO:0045735	lipase activity; nutrient reservoir activity	GO:0005737 GO:0009507 GO:0016020	cytoplasm; chloroplast; membrane	PF01734	Patatin-like phospholipase	PTHR10470	PATATIN-RELATED	KOG0513	Ca2+-independent_phospholipase_A2	NA	NA	NA	NA
Glyma06g04140	327	UniRef100_I1K7Y1 Uncharacterized protein n=1 Tax=Glycine max RepID=I1K7Y1_SOYBN	0	99.69	UniRef100_G7J6B0 Gibberellin receptor GID1 n=1 Tax=Medicago truncatula RepID=G7J6B0_MEDTR	2e-156	98.47	AT1G47480.1 | Symbols: | alpha/beta-Hydrolases superfamily protein | chr1:17417623-17419296 FORWARD LENGTH=314	2e-126	97.25	GO:0008152 GO:0048765	metabolic process; root hair cell differentiation	GO:0016787	hydrolase activity	GO:0005634	nucleus	PF07859	alpha/beta hydrolase fold	PTHR23024 PTHR23024:SF10	MEMBER OF 'GDXG' FAMILY OF LIPOLYTIC ENZYMES; CARBOXYLESTERASE-RELATED	KOG1515	Arylacetamide_deacetylase	NA	NA	NA	NA
Glyma06g04170	215	UniRef100_UPI0002339BCB UPI0002339BCB related cluster n=1 Tax=unknown RepID=UPI0002339BCB	2e-150	96.74	NA	NA	NA	AT1G47410.2 | Symbols: | unknown protein; FUNCTIONS IN: molecular_function unknown; INVOLVED IN: biological_process unknown; LOCATED IN: cellular_component unknown; EXPRESSED IN: 22 plant structures; EXPRESSED DURING: 14 growth stages. | chr1:17394818-17395508 FORWARD LENGTH=189	6e-31	84.19	GO:0008150 GO:0010413 GO:0016926 GO:0042546 GO:0044036 GO:0045492	biological process; glucuronoxylan metabolic process; protein desumoylation; cell wall biogenesis; cell wall macromolecule metabolic process; xylan biosynthetic process	GO:0003674	molecular function	GO:0005739	mitochondrion	NA	NA	NA	NA	NA	NA	NA	NA	NA	NA
Glyma06g04180	321	UniRef100_I1K7Y3 Uncharacterized protein n=1 Tax=Glycine max RepID=I1K7Y3_SOYBN	0	99.69	UniRef100_Q8VZI6 AT4g33380/F17M5_140 n=1 Tax=Arabidopsis thaliana RepID=Q8VZI6_ARATH	1e-132	98.75	AT4G33380.1 | Symbols: | unknown protein; Has 194 Blast hits to 189 proteins in 23 species: Archae - 0; Bacteria - 0; Metazoa - 0; Fungi - 0; Plants - 184; Viruses - 0; Other Eukaryotes - 10 (source: NCBI BLink). | chr4:16072064-16074605 FORWARD LENGTH=328	2e-135	98.75	NA	NA	NA	NA	GO:0005794	Golgi apparatus	NA	NA	NA	NA	NA	NA	NA	NA	NA	NA
Glyma06g04200	233	UniRef100_I1K7Y7 Uncharacterized protein n=1 Tax=Glycine max RepID=I1K7Y7_SOYBN	9e-170	99.57	UniRef100_G7J6B9 B3 domain-containing protein n=1 Tax=Medicago truncatula RepID=G7J6B9_MEDTR	5e-102	94.85	AT5G42700.1 | Symbols: | AP2/B3-like transcriptional factor family protein | chr5:17122171-17124177 FORWARD LENGTH=211	3e-74	96.57	GO:0006355	regulation of transcription, DNA-dependent	GO:0003677	DNA binding	GO:0005634	nucleus	PF02362	B3 DNA binding domain	NA	NA	NA	NA	NA	NA	NA	NA
Glyma06g04210	430	UniRef100_I1K7Y8 Uncharacterized protein n=1 Tax=Glycine max RepID=I1K7Y8_SOYBN	0	99.77	UniRef100_E4MXN4 mRNA, clone: RTFL01-28-G13 n=1 Tax=Eutrema halophilum RepID=E4MXN4_THEHA	0	99.77	AT1G47380.1 | Symbols: | Protein phosphatase 2C family protein | chr1:17373004-17375305 REVERSE LENGTH=428	0	99.77	NA	NA	GO:0003824 GO:0004722	catalytic activity; protein serine/threonine phosphatase activity	GO:0005739 GO:0005829	mitochondrion; cytosol	PF00481	Protein phosphatase 2C	PTHR13832 PTHR13832:SF25	PROTEIN PHOSPHATASE 2C; gb def: serine-threonine phosophatase 2c [toxoplasma gondii]	KOG0698	Serine/threonine_protein_phosphatase	NA	NA	NA	NA
Glyma06g04220	296	UniRef100_I1K7Y9 Uncharacterized protein n=1 Tax=Glycine max RepID=I1K7Y9_SOYBN	0	99.66	UniRef100_G7I3N4 BRI1-KD interacting protein n=1 Tax=Medicago truncatula RepID=G7I3N4_MEDTR	2e-62	90.2	AT5G42750.1 | Symbols: BKI1 | BRI1 kinase inhibitor 1 | chr5:17143028-17144041 REVERSE LENGTH=337	3e-35	97.3	GO:0010423	negative regulation of brassinosteroid biosynthetic process	GO:0005515 GO:0046982	protein binding; protein heterodimerization activity	GO:0005634 GO:0005829 GO:0005886	nucleus; cytosol; plasma membrane	NA	NA	NA	NA	NA	NA	NA	NA	K14499	BRI1_kinase_inhibitor_1
Glyma06g04230	870	UniRef100_G7J6C5 Phosphatidate phosphatase LPIN3 n=1 Tax=Medicago truncatula RepID=G7J6C5_MEDTR	0	99.89	UniRef100_G7J6C5 Phosphatidate phosphatase LPIN3 n=1 Tax=Medicago truncatula RepID=G7J6C5_MEDTR	0	99.89	AT5G42870.1 | Symbols: ATPAH2, PAH2 | phosphatidic acid phosphohydrolase 2 | chr5:17185719-17189681 REVERSE LENGTH=930	3e-157	35.17	GO:0006629 GO:0016036	lipid metabolic process; cellular response to phosphate starvation	GO:0008195	phosphatidate phosphatase activity	GO:0005634 GO:0016020 GO:0048046	nucleus; membrane; apoplast	PF08235 PF04571	LNS2 (Lipin/Ned1/Smp2); lipin, N-terminal conserved region	PTHR12181 PTHR12181:SF4	LIPIN; LIPIN 3-RELATED	KOG2116	Protein_involved_in_plasmid_maintenance/nuclear_protein_involved_in_lipid_metabolism	NA	NA	NA	NA
Glyma06g04240	96	UniRef100_I1K7Z2 Uncharacterized protein n=1 Tax=Glycine max RepID=I1K7Z2_SOYBN	3e-61	98.96	UniRef100_G7I3N1 Calcium-binding protein n=1 Tax=Medicago truncatula RepID=G7I3N1_MEDTR	5e-42	98.96	NA	NA	NA	NA	NA	NA	NA	NA	NA	NA	NA	NA	NA	NA	NA	NA	NA	NA	NA
Glyma06g04250	261	UniRef100_I1K7Z3 Uncharacterized protein n=1 Tax=Glycine max RepID=I1K7Z3_SOYBN	0	99.62	UniRef100_B9R7D1 Protein translocase, putative n=1 Tax=Ricinus communis RepID=B9R7D1_RICCO	3e-137	98.85	AT4G33350.1 | Symbols: | Tic22-like family protein | chr4:16064638-16066715 REVERSE LENGTH=268	1e-128	98.85	NA	NA	NA	NA	GO:0009507 GO:0009536 GO:0009706 GO:0009941	chloroplast; plastid; chloroplast inner membrane; chloroplast envelope	PF04278	Tic22-like family	NA	NA	NA	NA	NA	NA	NA	NA
Glyma06g04270	954	UniRef100_UPI0002339BCE UPI0002339BCE related cluster n=1 Tax=unknown RepID=UPI0002339BCE	0	99.9	UniRef100_B9R7C9 Paramyosin, putative n=1 Tax=Ricinus communis RepID=B9R7C9_RICCO	0	69.18	AT2G26570.1 | Symbols: WEB1 | Plant protein of unknown function (DUF827) | chr2:11299565-11302076 FORWARD LENGTH=807	0	69.6	GO:0009903 GO:0009904	chloroplast avoidance movement; chloroplast accumulation movement	GO:0005515	protein binding	GO:0005829 GO:0005886	cytosol; plasma membrane	PF05701	Plant protein of unknown function (DUF827)	NA	NA	NA	NA	NA	NA	NA	NA
Glyma06g04280	286	UniRef100_I1K7Z5 Uncharacterized protein n=1 Tax=Glycine max RepID=I1K7Z5_SOYBN	0	91.96	UniRef100_G7J6D2 Chlorophyll a-b binding protein n=1 Tax=Medicago truncatula RepID=G7J6D2_MEDTR	1e-143	90.91	AT1G45474.2 | Symbols: LHCA5 | photosystem I light harvesting complex gene 5 | chr1:17179353-17180439 FORWARD LENGTH=256	6e-130	74.48	GO:0006364 GO:0009657 GO:0009765 GO:0009768 GO:0010027 GO:0010207 GO:0015979	rRNA processing; plastid organization; photosynthesis, light harvesting; photosynthesis, light harvesting in photosystem I; thylakoid membrane organization; photosystem II assembly; photosynthesis	GO:0031409	pigment binding	GO:0009507 GO:0009535 GO:0009782 GO:0016020 GO:0030076	chloroplast; chloroplast thylakoid membrane; photosystem I antenna complex; membrane; light-harvesting complex	PF00504	Chlorophyll A-B binding protein	PTHR21649	CHLOROPHYLL A/B BINDING PROTEIN	NA	NA	NA	NA	K08911	light-harvesting_complex_I_chlorophyll_a/b_binding_protein_5
Glyma06g04290	638	UniRef100_I1K7Z6 Uncharacterized protein n=1 Tax=Glycine max RepID=I1K7Z6_SOYBN	0	99.84	UniRef100_G7J6D3 DEM2 n=1 Tax=Medicago truncatula RepID=G7J6D3_MEDTR	0	99.84	AT4G33400.1 | Symbols: | Vacuolar import/degradation, Vid27-related protein | chr4:16078189-16080410 REVERSE LENGTH=645	0	99.84	GO:0000085 GO:0006260 GO:0006275 GO:0006306 GO:0006342 GO:0006499 GO:0008283 GO:0009640 GO:0009909 GO:0010388 GO:0010389 GO:0016458 GO:0016567 GO:0016571 GO:0016572 GO:0016579 GO:0031047 GO:0034968 GO:0045893 GO:0051567	G2 phase of mitotic cell cycle; DNA replication; regulation of DNA replication; DNA methylation; chromatin silencing; N-terminal protein myristoylation; cell proliferation; photomorphogenesis; regulation of flower development; cullin deneddylation; regulation of G2/M transition of mitotic cell cycle; gene silencing; protein ubiquitination; histone methylation; histone phosphorylation; protein deu…	GO:0003674	molecular function	GO:0005634 GO:0005737 GO:0005829 GO:0005886	nucleus; cytoplasm; cytosol; plasma membrane	PF08553	VID27 cytoplasmic protein	NA	NA	KOG2395	Protein_involved_in_vacuole_import_and_degradation	NA	NA	NA	NA
Glyma06g04300	223	UniRef100_I1K7Z7 Uncharacterized protein n=2 Tax=Glycine max RepID=I1K7Z7_SOYBN	1e-160	99.55	UniRef100_G7J6D9 Thioredoxin H-type 3 n=1 Tax=Medicago truncatula RepID=G7J6D9_MEDTR	7e-78	71.3	AT1G07700.1 | Symbols: | Thioredoxin superfamily protein | chr1:2380214-2381127 FORWARD LENGTH=204	2e-73	58.3	GO:0006662 GO:0010264 GO:0045454	glycerol ether metabolic process; myo-inositol hexakisphosphate biosynthetic process; cell redox homeostasis	GO:0009055 GO:0015035	electron carrier activity; protein disulfide oxidoreductase activity	GO:0005737 GO:0009507 GO:0009570	cytoplasm; chloroplast; chloroplast stroma	PF00085	Thioredoxin	PTHR10438 PTHR10438:SF16	THIOREDOXIN-RELATED; THIOREDOXIN - RELATED	KOG0907	Thioredoxin	NA	NA	NA	NA
Glyma06g04310	715	UniRef100_I1K7Z8 Uncharacterized protein (Fragment) n=2 Tax=Glycine max RepID=I1K7Z8_SOYBN	0	79.44	UniRef100_G7J6D5 Pentatricopeptide repeat-containing protein n=1 Tax=Medicago truncatula RepID=G7J6D5_MEDTR	0	99.58	AT2G04860.1 | Symbols: | Tetratricopeptide repeat (TPR)-like superfamily protein | chr2:1706787-1708865 REVERSE LENGTH=692	0	95.24	GO:0008150	biological process	NA	NA	GO:0005739	mitochondrion	PF01535	PPR repeat	PTHR24015 PTHR24015:SF4	FAMILY NOT NAMED; SUBFAMILY NOT NAMED	NA	NA	NA	NA	NA	NA
Glyma06g04320	256	UniRef100_I1K7Z9 Uncharacterized protein n=1 Tax=Glycine max RepID=I1K7Z9_SOYBN	0	99.61	UniRef100_Q00M76 Aromatic-rich family protein n=1 Tax=Glycine max RepID=Q00M76_SOYBN	3e-165	99.61	AT4G17650.1 | Symbols: | Polyketide cyclase / dehydrase and lipid transport protein | chr4:9827749-9829443 FORWARD LENGTH=256	5e-90	99.61	GO:0008150 GO:0015824 GO:0016036 GO:0019243 GO:0019375 GO:0042631	biological process; proline transport; cellular response to phosphate starvation; methylglyoxal catabolic process to D-lactate; galactolipid biosynthetic process; cellular response to water deprivation	GO:0003674	molecular function	GO:0005739	mitochondrion	PF03364	Polyketide cyclase / dehydrase and lipid transport	PTHR12901	UNCHARACTERIZED	KOG3177	Oligoketide_cyclase/lipid_transport_protein	NA	NA	NA	NA
Glyma06g04340	207	UniRef100_C6T490 Uncharacterized protein n=1 Tax=Glycine max RepID=C6T490_SOYBN	3e-148	99.52	UniRef100_G7J6E2 Protein DCL n=1 Tax=Medicago truncatula RepID=G7J6E2_MEDTR	4e-81	98.07	AT1G45230.1 | Symbols: | Protein of unknown function (DUF3223) | chr1:17169874-17171381 REVERSE LENGTH=219	8e-70	59.9	GO:0008150	biological process	GO:0003674	molecular function	GO:0009507	chloroplast	PF11523	Protein of unknown function (DUF3223)	NA	NA	NA	NA	NA	NA	NA	NA
Glyma06g04360	803	UniRef100_I1K802 Uncharacterized protein n=2 Tax=Glycine max RepID=I1K802_SOYBN	0	99.88	UniRef100_Q00M79 Expressed protein-like protein n=1 Tax=Glycine max RepID=Q00M79_SOYBN	0	96.64	AT5G42920.2 | Symbols: THO5, AtTHO5 | THO complex, subunit 5 | chr5:17206310-17209522 REVERSE LENGTH=819	0	99.88	GO:0008150	biological process	GO:0003674	molecular function	GO:0005634	nucleus	PF09766	Fms-interacting protein	PTHR13375	FMS INTERACTING PROTEIN	KOG2216	Conserved_coiled/coiled_coil_protein	NA	NA	NA	NA
Glyma06g04370	478	UniRef100_Q00M66 Remorin n=1 Tax=Glycine max RepID=Q00M66_SOYBN	0	99.79	UniRef100_Q00M66 Remorin n=1 Tax=Glycine max RepID=Q00M66_SOYBN	0	99.79	AT1G45207.2 | Symbols: | Remorin family protein | chr1:17130703-17133548 REVERSE LENGTH=555	6e-113	88.08	GO:0008150	biological process	GO:0003674	molecular function	GO:0005634 GO:0005886	nucleus; plasma membrane	PF03763	Remorin, C-terminal region	NA	NA	NA	NA	NA	NA	NA	NA
Glyma06g04380	259	UniRef100_Q00M67 Bhelix-loop-helix transcription factor n=1 Tax=Glycine max RepID=Q00M67_SOYBN	0	99.61	UniRef100_Q00M67 Bhelix-loop-helix transcription factor n=1 Tax=Glycine max RepID=Q00M67_SOYBN	0	99.61	AT3G50330.1 | Symbols: HEC2 | basic helix-loop-helix (bHLH) DNA-binding superfamily protein | chr3:18657423-18658118 REVERSE LENGTH=231	5e-45	45.17	GO:0006355 GO:0010500 GO:0048462 GO:0080126	regulation of transcription, DNA-dependent; transmitting tissue development; carpel formation; ovary septum development	GO:0003677 GO:0003700	DNA binding; sequence-specific DNA binding transcription factor activity	GO:0005634	nucleus	PF00010	Helix-loop-helix DNA-binding domain	PTHR12565	STEROL REGULATORY ELEMENT-BINDING PROTEIN	NA	NA	NA	NA	NA	NA
Glyma06g04390	364	UniRef100_Q00M68 Heat shock transcription factor (HSF) n=1 Tax=Glycine max RepID=Q00M68_SOYBN	0	99.73	UniRef100_Q00M68 Heat shock transcription factor (HSF) n=1 Tax=Glycine max RepID=Q00M68_SOYBN	0	99.73	AT1G46264.1 | Symbols: AT-HSFB4, HSFB4, SCZ | heat shock transcription factor B4 | chr1:17224904-17226183 FORWARD LENGTH=348	8e-123	99.45	GO:0006355 GO:0008356 GO:0009408	regulation of transcription, DNA-dependent; asymmetric cell division; response to heat	GO:0003677 GO:0003700 GO:0043565	DNA binding; sequence-specific DNA binding transcription factor activity; sequence-specific DNA binding	GO:0005634	nucleus	PF00447	HSF-type DNA-binding	PTHR10015 PTHR10015:SF7	HEAT SHOCK TRANSCRIPTION FACTOR; HEAT SHOCK TRANSCRIPTION FACTOR	KOG0627	Heat_shock_transcription_factor	NA	NA	NA	NA
Glyma06g04410	709	UniRef100_UPI000233904D UPI000233904D related cluster n=1 Tax=unknown RepID=UPI000233904D	0	99.86	UniRef100_Q00M69 Zinc finger protein n=1 Tax=Glycine max RepID=Q00M69_SOYBN	0	99.86	AT1G45180.1 | Symbols: | RING/U-box superfamily protein | chr1:17099335-17101683 FORWARD LENGTH=645	4e-106	99.86	NA	NA	GO:0008270	zinc ion binding	GO:0005634	nucleus	PF00097	Zinc finger, C3HC4 type (RING finger)	PTHR14155 PTHR14155:SF18	RING FINGER PROTEIN 6/12/38; SUBFAMILY NOT NAMED	NA	NA	NA	NA	NA	NA
Glyma06g04430	458	UniRef100_I1K810 Uncharacterized protein n=2 Tax=Glycine max RepID=I1K810_SOYBN	0	99.78	UniRef100_Q00M88 N-hydroxycinnamoyl/benzoyltransferase 2 n=1 Tax=Glycine max RepID=Q00M88_SOYBN	0	99.13	AT5G42830.1 | Symbols: | HXXXD-type acyl-transferase family protein | chr5:17176384-17177906 FORWARD LENGTH=450	0	96.51	NA	NA	GO:0016740 GO:0016747	transferase activity; transferase activity, transferring acyl groups other than amino-acyl groups	GO:0005737 GO:0005829	cytoplasm; cytosol	PF02458	Transferase family	NA	NA	NA	NA	NA	NA	NA	NA
Glyma06g04440	457	UniRef100_I1K811 Uncharacterized protein n=2 Tax=Glycine max RepID=I1K811_SOYBN	0	99.78	UniRef100_Q00M86 N-hydroxycinnamoyl/benzoyltransferase 4 n=1 Tax=Glycine max RepID=Q00M86_SOYBN	0	99.34	AT5G42830.1 | Symbols: | HXXXD-type acyl-transferase family protein | chr5:17176384-17177906 FORWARD LENGTH=450	0	96.72	NA	NA	GO:0016740 GO:0016747	transferase activity; transferase activity, transferring acyl groups other than amino-acyl groups	GO:0005737 GO:0005829	cytoplasm; cytosol	PF02458	Transferase family	NA	NA	NA	NA	NA	NA	NA	NA
Glyma06g04460	631	UniRef100_I1K813 Uncharacterized protein n=2 Tax=Glycine max RepID=I1K813_SOYBN	0	99.84	UniRef100_Q00M91 Poly(A)-binding protein n=1 Tax=Glycine max RepID=Q00M91_SOYBN	0	99.84	AT1G49760.2 | Symbols: PAB8 | poly(A) binding protein 8 | chr1:18416740-18419753 FORWARD LENGTH=671	0	96.04	GO:0006164 GO:0046686	purine nucleotide biosynthetic process; response to cadmium ion	GO:0003723 GO:0003743 GO:0005515	RNA binding; translation initiation factor activity; protein binding	GO:0005737 GO:0005829	cytoplasm; cytosol	PF00076 PF00658	RNA recognition motif. (a.k.a. RRM, RBD, or RNP domain); Poly-adenylate binding protein, unique domain	PTHR24011 PTHR24011:SF69	FAMILY NOT NAMED; SUBFAMILY NOT NAMED	KOG0123	Polyadenylate-binding_protein_(RRM_superfamily)	NA	NA	NA	NA
Glyma06g04470	231	UniRef100_C6TFY4 Uncharacterized protein n=1 Tax=Glycine max RepID=C6TFY4_SOYBN	5e-170	99.57	UniRef100_B9R791 Transcription factor, putative n=1 Tax=Ricinus communis RepID=B9R791_RICCO	1e-104	99.57	AT1G46480.1 | Symbols: WOX4 | WUSCHEL related homeobox 4 | chr1:17236903-17237953 REVERSE LENGTH=251	6e-73	98.27	GO:0006355 GO:0007165 GO:0010067	regulation of transcription, DNA-dependent; signal transduction; procambium histogenesis	GO:0003700 GO:0043565	sequence-specific DNA binding transcription factor activity; sequence-specific DNA binding	GO:0005634	nucleus	PF00046	Homeobox domain	NA	NA	NA	NA	NA	NA	NA	NA
Glyma06g04480	66	NA	NA	NA	NA	NA	NA	NA	NA	NA	NA	NA	NA	NA	NA	NA	NA	NA	NA	NA	NA	NA	NA	NA	NA	NA
Glyma06g04490	160	UniRef100_C5IU97 Drought responsive element binding protein 2 n=1 Tax=Glycine max RepID=C5IU97_SOYBN	1e-114	99.38	UniRef100_C5IU97 Drought responsive element binding protein 2 n=1 Tax=Glycine max RepID=C5IU97_SOYBN	1e-114	99.38	AT1G46768.1 | Symbols: RAP2.1 | related to AP2 1 | chr1:17266046-17266507 REVERSE LENGTH=153	9e-50	83.13	GO:0006355 GO:0009409 GO:0009414 GO:0045893	regulation of transcription, DNA-dependent; response to cold; response to water deprivation; positive regulation of transcription, DNA-dependent	GO:0003677 GO:0003700	DNA binding; sequence-specific DNA binding transcription factor activity	GO:0005634	nucleus	PF00847	AP2 domain	NA	NA	NA	NA	NA	NA	NA	NA
Glyma06g04510	479	UniRef100_I1K817 Uncharacterized protein n=1 Tax=Glycine max RepID=I1K817_SOYBN	0	99.79	UniRef100_G7J6Y7 Protein ssh4 n=1 Tax=Medicago truncatula RepID=G7J6Y7_MEDTR	0	92.9	AT4G06534.1 | Symbols: | unknown protein; FUNCTIONS IN: molecular_function unknown; INVOLVED IN: biological_process unknown; LOCATED IN: endomembrane system; Has 22 Blast hits to 22 proteins in 8 species: Archae - 0; Bacteria - 0; Metazoa - 0; Fungi - 0; Plants - 22; Viruses - 0; Other Eukaryotes - 0 (source: NCBI BLink). | chr4:3356870-3358087 FORWARD LENGTH=405	2e-47	67.85	GO:0008150	biological process	GO:0003674	molecular function	GO:0005576 GO:0009506	extracellular region; plasmodesma	PF00622	SPRY domain	NA	NA	NA	NA	NA	NA	NA	NA
Glyma06g04520	1024	UniRef100_UPI0002339CD8 UPI0002339CD8 related cluster n=1 Tax=unknown RepID=UPI0002339CD8	0	99.9	UniRef100_G7J6Z1 Kinesin-like protein n=1 Tax=Medicago truncatula RepID=G7J6Z1_MEDTR	0	99.8	AT5G47820.2 | Symbols: FRA1 | P-loop containing nucleoside triphosphate hydrolases superfamily protein | chr5:19366505-19372229 FORWARD LENGTH=1035	0	99.22	GO:0000394 GO:0007018 GO:0009086 GO:0010075 GO:0010215	RNA splicing, via endonucleolytic cleavage and ligation; microtubule-based movement; methionine biosynthetic process; regulation of meristem growth; cellulose microfibril organization	GO:0003777 GO:0005524	microtubule motor activity; ATP binding	GO:0005634 GO:0005737	nucleus; cytoplasm	PF00225	Kinesin motor domain	PTHR24115 PTHR24115:SF174	FAMILY NOT NAMED; SUBFAMILY NOT NAMED	KOG0244	Kinesin-like_protein	NA	NA	NA	NA
Glyma06g04530	591	UniRef100_I1K819 Uncharacterized protein n=1 Tax=Glycine max RepID=I1K819_SOYBN	0	93.74	UniRef100_G7J6Z2 Disease resistance protein n=1 Tax=Medicago truncatula RepID=G7J6Z2_MEDTR	2e-135	62.44	AT5G43020.1 | Symbols: | Leucine-rich repeat protein kinase family protein | chr5:17255426-17257742 REVERSE LENGTH=669	5e-93	56.01	GO:0000911 GO:0006468 GO:0007169 GO:0051322	cytokinesis by cell plate formation; protein phosphorylation; transmembrane receptor protein tyrosine kinase signaling pathway; anaphase	GO:0004672 GO:0004674 GO:0005524 GO:0016301 GO:0016772	protein kinase activity; protein serine/threonine kinase activity; ATP binding; kinase activity; transferase activity, transferring phosphorus-containing groups	GO:0005886	plasma membrane	PF00069 PF00560	Protein kinase domain; Leucine Rich Repeat	PTHR24420	FAMILY NOT NAMED	KOG2345	Serine/threonine_protein_kinase/TGF-beta_stimulated_factor	NA	NA	NA	NA
Glyma06g04540	334	UniRef100_I1K820 Uncharacterized protein n=1 Tax=Glycine max RepID=I1K820_SOYBN	0	99.7	UniRef100_O24323 Cysteine proteinase n=1 Tax=Phaseolus vulgaris RepID=O24323_PHAVU	4e-59	73.95	AT1G47128.1 | Symbols: RD21, RD21A | Granulin repeat cysteine protease family protein | chr1:17283139-17285609 REVERSE LENGTH=462	3e-49	75.45	GO:0006096 GO:0006508 GO:0006833 GO:0006972 GO:0007030 GO:0009266 GO:0009414 GO:0009651 GO:0015996 GO:0042744 GO:0046686 GO:0050832	glycolysis; proteolysis; water transport; hyperosmotic response; Golgi organization; response to temperature stimulus; response to water deprivation; response to salt stress; chlorophyll catabolic process; hydrogen peroxide catabolic process; response to cadmium ion; defense response to fungus	GO:0005515 GO:0008233 GO:0008234	protein binding; peptidase activity; cysteine-type peptidase activity	GO:0005576 GO:0005773 GO:0009506 GO:0009507 GO:0048046	extracellular region; vacuole; plasmodesma; chloroplast; apoplast	PF00112	Papain family cysteine protease	PTHR12411 PTHR12411:SF44	CYSTEINE PROTEASE FAMILY C1-RELATED; CATHEPSIN L-RELATED	KOG1543	Cysteine_proteinase_Cathepsin_L	NA	NA	NA	NA
Glyma06g04550	324	UniRef100_I1K821 Uncharacterized protein n=1 Tax=Glycine max RepID=I1K821_SOYBN	0	99.69	UniRef100_Q2HTQ7 Basic helix-loop-helix protein, putative n=1 Tax=Medicago truncatula RepID=Q2HTQ7_MEDTR	5e-125	97.53	AT1G60060.1 | Symbols: | Serine/threonine-protein kinase WNK (With No Lysine)-related | chr1:22139282-22141585 FORWARD LENGTH=386	7e-75	86.42	GO:0008150	biological process	GO:0003674	molecular function	GO:0005576	extracellular region	NA	NA	PTHR13902 PTHR13902:SF3	SERINE/THREONINE-PROTEIN KINASE WNK (WITH NO LYSINE)-RELATED; NUCLEAR RECEPTOR BINDING PROTEIN-RELATED	NA	NA	NA	NA	NA	NA
Glyma06g04560	405	UniRef100_I1K822 Uncharacterized protein (Fragment) n=2 Tax=Glycine max RepID=I1K822_SOYBN	0	94.07	UniRef100_B9R772 Skip-2, putative n=1 Tax=Ricinus communis RepID=B9R772_RICCO	2e-104	93.58	AT4G07400.1 | Symbols: VFB3 | VIER F-box proteine 3 | chr4:4197847-4199511 REVERSE LENGTH=554	1e-94	94.81	GO:0006511	ubiquitin-dependent protein catabolic process	GO:0004842	ubiquitin-protein ligase activity	GO:0005634	nucleus	PF00646	F-box domain	PTHR23125 PTHR23125:SF44	F-BOX/LEUCINE RICH REPEAT PROTEIN; SKIP-2, ARATH	NA	NA	NA	NA	NA	NA
Glyma06g04590	328	UniRef100_I1K824 Uncharacterized protein n=1 Tax=Glycine max RepID=I1K824_SOYBN	0	99.7	UniRef100_Q2PW34 L-asparaginase 2 n=1 Tax=Phaseolus vulgaris RepID=Q2PW34_PHAVU	0	99.7	AT3G16150.1 | Symbols: | N-terminal nucleophile aminohydrolases (Ntn hydrolases) superfamily protein | chr3:5471794-5473033 FORWARD LENGTH=325	0	99.7	GO:0006516 GO:0033345 GO:0051604	glycoprotein catabolic process; asparagine catabolic process via L-aspartate; protein maturation	GO:0004067 GO:0016787	asparaginase activity; hydrolase activity	GO:0005737	cytoplasm	PF01112	Asparaginase	PTHR10188	PROTEASE T2 ASPARAGINASE	KOG1592	Asparaginase	NA	NA	NA	NA
Glyma06g04600	312	UniRef100_I1JTM7 Uncharacterized protein n=1 Tax=Glycine max RepID=I1JTM7_SOYBN	0	95.51	UniRef100_D7MF41 Hydrolase n=1 Tax=Arabidopsis lyrata subsp. lyrata RepID=D7MF41_ARALL	4e-79	76.92	AT3G53010.1 | Symbols: | Domain of unknown function (DUF303) _x0001_| chr3:19656603-19657928 REVERSE LENGTH=297	7e-100	90.71	GO:0008150	biological process	GO:0003674	molecular function	NA	NA	PF03629	Domain of unknown function (DUF303)	NA	NA	NA	NA	NA	NA	NA	NA
Glyma06g04610	782	UniRef100_UPI0002339BD2 UPI0002339BD2 related cluster n=1 Tax=unknown RepID=UPI0002339BD2	0	99.87	UniRef100_G7J0P4 Receptor-like protein kinase n=1 Tax=Medicago truncatula RepID=G7J0P4_MEDTR	0	98.21	AT4G00340.1 | Symbols: RLK4 | receptor-like protein kinase 4 | chr4:148958-151496 FORWARD LENGTH=818	4e-97	96.8	GO:0006468 GO:0048544	protein phosphorylation; recognition of pollen	GO:0004672 GO:0004674 GO:0004713 GO:0005524 GO:0016772 GO:0030246	protein kinase activity; protein serine/threonine kinase activity; protein tyrosine kinase activity; ATP binding; transferase activity, transferring phosphorus-containing groups; carbohydrate binding	GO:0005886 GO:0016020	plasma membrane; membrane	PF00954 PF00069 PF08276 PF01453	S-locus glycoprotein family; Protein kinase domain; PAN-like domain; D-mannose binding lectin	PTHR24420 PTHR24420:SF590	FAMILY NOT NAMED;	KOG1187	Serine/threonine_protein_kinase	NA	NA	NA	NA
Glyma06g04620	326	UniRef100_I1K828 Uncharacterized protein n=1 Tax=Glycine max RepID=I1K828_SOYBN	0	99.69	UniRef100_B9SG10 Chromatin binding protein, putative n=1 Tax=Ricinus communis RepID=B9SG10_RICCO	2e-105	85.89	AT1G02740.1 | Symbols: | MRG family protein | chr1:599734-602021 REVERSE LENGTH=327	5e-106	96.63	NA	NA	NA	NA	GO:0005634	nucleus	PF11717 PF05712	RNA binding activity-knot of a chromodomain; MRG	PTHR10880 PTHR10880:SF15	MALE-SPECIFIC LETHAL-3 - RELATED; MORTALITY FACTOR 4-LIKE PROTEIN 1	NA	NA	NA	NA	K11339	mortality_factor_4-like_protein_1
Glyma06g04640	175	UniRef100_I1K830 Uncharacterized protein n=1 Tax=Glycine max RepID=I1K830_SOYBN	4e-126	99.43	UniRef100_C4T9C1 SLEEPY1a n=1 Tax=Lotus japonicus RepID=C4T9C1_LOTJA	6e-75	81.71	AT4G24210.1 | Symbols: SLY1 | F-box family protein | chr4:12563658-12564113 FORWARD LENGTH=151	1e-57	97.71	GO:0009723 GO:0009737 GO:0009740 GO:0009845 GO:0009863 GO:0009867 GO:0009939 GO:0010162 GO:0010325 GO:0042538 GO:0048444	response to ethylene stimulus; response to abscisic acid stimulus; gibberellic acid mediated signaling pathway; seed germination; salicylic acid mediated signaling pathway; jasmonic acid mediated signaling pathway; positive regulation of gibberellic acid mediated signaling pathway; seed dormancy process; raffinose family oligosaccharide biosynthetic process; hyperosmotic salinity response; floral…	GO:0005515	protein binding	GO:0005634 GO:0019005	nucleus; SCF ubiquitin ligase complex	PF00646	F-box domain	NA	NA	NA	NA	NA	NA	K14495	F-box_protein_GID2
Glyma06g04650	90	UniRef100_I1K831 Uncharacterized protein n=1 Tax=Glycine max RepID=I1K831_SOYBN	2e-54	98.89	NA	NA	NA	NA	NA	NA	NA	NA	NA	NA	NA	NA	NA	NA	NA	NA	NA	NA	NA	NA	NA	NA
Glyma06g04660	162	UniRef100_I1K832 Uncharacterized protein n=1 Tax=Glycine max RepID=I1K832_SOYBN	5e-106	99.38	UniRef100_Q9M7N6 MFP1 attachment factor 1 n=1 Tax=Solanum lycopersicum RepID=MAF1_SOLLC	5e-44	78.4	AT1G47200.1 | Symbols: WPP2 | WPP domain protein 2 | chr1:17298181-17298723 REVERSE LENGTH=180	5e-41	64.2	GO:0006913 GO:0007067 GO:0048527	nucleocytoplasmic transport; mitosis; lateral root development	GO:0003674	molecular function	GO:0005634 GO:0005640 GO:0005829 GO:0005886	nucleus; nuclear outer membrane; cytosol; plasma membrane	NA	NA	NA	NA	NA	NA	NA	NA	NA	NA
Glyma06g04670	566	UniRef100_UPI0002339BD3 UPI0002339BD3 related cluster n=1 Tax=unknown RepID=UPI0002339BD3	0	99.82	UniRef100_B9SG25 Polyadenylation factor subunit, putative n=1 Tax=Ricinus communis RepID=B9SG25_RICCO	0	99.82	AT5G67320.1 | Symbols: HOS15 | WD-40 repeat family protein | chr5:26857268-26860974 FORWARD LENGTH=613	0	66.78	GO:0000085 GO:0000956 GO:0006342 GO:0009409 GO:0009640 GO:0010388 GO:0016567 GO:0016571 GO:0016572 GO:0016575 GO:0016579 GO:0045893 GO:0051567	G2 phase of mitotic cell cycle; nuclear-transcribed mRNA catabolic process; chromatin silencing; response to cold; photomorphogenesis; cullin deneddylation; protein ubiquitination; histone methylation; histone phosphorylation; histone deacetylation; protein deubiquitination; positive regulation of transcription, DNA-dependent; histone H3-K9 methylation	NA	NA	GO:0005634 GO:0005834 GO:0080008	nucleus; heterotrimeric G-protein complex; CUL4-RING ubiquitin ligase complex	PF00400 PF08513	WD domain, G-beta repeat; LisH	PTHR22846 PTHR22846:SF2	WD40 REPEAT PROTEIN; TRANSDUCIN BETA-LIKE 1	KOG0273	Beta-transducin_family_(WD-40_repeat)_protein	NA	NA	NA	NA
Glyma06g04680	359	UniRef100_I1K835 Uncharacterized protein n=1 Tax=Glycine max RepID=I1K835_SOYBN	0	99.72	UniRef100_Q39877 Mitotic cyclin a1-type n=1 Tax=Glycine max RepID=Q39877_SOYBN	0	97.49	AT1G47230.1 | Symbols: CYCA3;4 | CYCLIN A3;4 | chr1:17306752-17308587 FORWARD LENGTH=369	2e-129	96.66	GO:0000079 GO:0000278 GO:0010389 GO:0010440 GO:0042023 GO:0045736 GO:0051726	regulation of cyclin-dependent protein kinase activity; mitotic cell cycle; regulation of G2/M transition of mitotic cell cycle; stomatal lineage progression; DNA endoreduplication; negative regulation of cyclin-dependent protein kinase activity; regulation of cell cycle	GO:0005515 GO:0016538 GO:0019901	protein binding; cyclin-dependent protein kinase regulator activity; protein kinase binding	GO:0005634	nucleus	PF00134 PF02984	Cyclin, N-terminal domain; Cyclin, C-terminal domain	PTHR10177 PTHR10177:SF49	CYCLINS; G2/MITOTIC-SPECIFIC CYCLIN	KOG0654	G2/Mitotic-specific_cyclin_A	NA	NA	NA	NA
Glyma06g04690	212	UniRef100_UPI0002339D2F UPI0002339D2F related cluster n=1 Tax=unknown RepID=UPI0002339D2F	2e-144	99.53	UniRef100_Q39877 Mitotic cyclin a1-type n=1 Tax=Glycine max RepID=Q39877_SOYBN	1e-114	99.53	AT5G43080.1 | Symbols: CYCA3;1 | Cyclin A3;1 | chr5:17293227-17294789 FORWARD LENGTH=355	2e-90	89.62	GO:0000079 GO:0000724 GO:0010389 GO:0051726	regulation of cyclin-dependent protein kinase activity; double-strand break repair via homologous recombination; regulation of G2/M transition of mitotic cell cycle; regulation of cell cycle	GO:0005515 GO:0016538 GO:0019901	protein binding; cyclin-dependent protein kinase regulator activity; protein kinase binding	GO:0005634	nucleus	PF02984 PF00134	Cyclin, C-terminal domain; Cyclin, N-terminal domain	PTHR10177 PTHR10177:SF49	CYCLINS; G2/MITOTIC-SPECIFIC CYCLIN	NA	NA	NA	NA	NA	NA
Glyma06g04720	523	UniRef100_I1K839 Uncharacterized protein n=1 Tax=Glycine max RepID=I1K839_SOYBN	0	99.81	UniRef100_G8A2C0 Natural resistance-associated macrophage protein n=2 Tax=Medicago truncatula RepID=G8A2C0_MEDTR	0	99.81	AT1G47240.1 | Symbols: NRAMP2, ATNRAMP2 | NRAMP metal ion transporter 2 | chr1:17309043-17311308 REVERSE LENGTH=530	0	95.03	GO:0006810 GO:0006875 GO:0030001	transport; cellular metal ion homeostasis; metal ion transport	GO:0005215 GO:0015103 GO:0046873	transporter activity; inorganic anion transmembrane transporter activity; metal ion transmembrane transporter activity	GO:0005634 GO:0016020	nucleus; membrane	PF01566	Natural resistance-associated macrophage protein	PTHR11706 PTHR11706:SF8	MANGANESE TRANSPORTER; NATURAL RESISTANCE-ASSOCIATED MACROPHAGE PROTEIN (NRAMP) (MANGANESE TRANSPORTER)	KOG1291	Mn2+_and_Fe2+_transporters_of_the_NRAMP_family	NA	NA	NA	NA
Glyma06g04740	89	UniRef100_C6SY10 Uncharacterized protein n=1 Tax=Glycine max RepID=C6SY10_SOYBN	7e-56	98.88	UniRef100_B9R733 GAST1 protein, putative n=1 Tax=Ricinus communis RepID=B9R733_RICCO	5e-40	98.88	AT5G59845.1 | Symbols: | Gibberellin-regulated family protein | chr5:24111443-24111808 FORWARD LENGTH=89	2e-34	98.88	GO:0009739	response to gibberellin stimulus	GO:0003674	molecular function	GO:0005576	extracellular region	PF02704	Gibberellin regulated protein	NA	NA	NA	NA	NA	NA	NA	NA
Glyma06g04760	389	UniRef100_I1K843 Uncharacterized protein n=1 Tax=Glycine max RepID=I1K843_SOYBN	0	99.74	UniRef100_G8A2A9 Progesterone 5-beta-reductase n=1 Tax=Medicago truncatula RepID=G8A2A9_MEDTR	0	99.74	AT4G24220.1 | Symbols: VEP1, AWI31 | NAD(P)-binding Rossmann-fold superfamily protein | chr4:12565219-12566474 FORWARD LENGTH=388	0	99.74	GO:0008202 GO:0009611 GO:0010051	steroid metabolic process; response to wounding; xylem and phloem pattern formation	GO:0000166 GO:0035671	nucleotide binding; enone reductase activity	GO:0005829	cytosol	NA	NA	PTHR10366 PTHR10366:SF164	NAD DEPENDENT EPIMERASE/DEHYDRATASE;	NA	NA	NA	NA	NA	NA
Glyma06g04790	390	UniRef100_I1K847 Uncharacterized protein n=1 Tax=Glycine max RepID=I1K847_SOYBN	0	99.74	UniRef100_Q2HRK3 Syntaxin-61 n=1 Tax=Medicago truncatula RepID=Q2HRK3_MEDTR	9e-132	83.59	AT1G27700.1 | Symbols: | Syntaxin/t-SNARE family protein | chr1:9640394-9641752 REVERSE LENGTH=297	1e-81	83.59	GO:0016192 GO:0048193	vesicle-mediated transport; Golgi vesicle transport	NA	NA	GO:0005634 GO:0005794 GO:0016020	nucleus; Golgi apparatus; membrane	PF09177	Syntaxin 6, N-terminal	NA	NA	NA	NA	NA	NA	NA	NA
Glyma06g04800	329	UniRef100_I1K849 Uncharacterized protein n=1 Tax=Glycine max RepID=I1K849_SOYBN	0	99.7	UniRef100_G8A2A3 Arginine N-methyltransferase n=2 Tax=Medicago truncatula RepID=G8A2A3_MEDTR	0	98.48	AT5G65860.2 | Symbols: | ankyrin repeat family protein | chr5:26347706-26348686 REVERSE LENGTH=326	0	97.26	GO:0008152 GO:0009165	metabolic process; nucleotide biosynthetic process	GO:0008168	methyltransferase activity	GO:0005737	cytoplasm	PF00023	Ankyrin repeat	PTHR15047	GUANIDINOACETATE N-METHYLTRANSFERASE	KOG1709	Guanidinoacetate_methyltransferase_and_related_proteins	NA	NA	NA	NA
Glyma06g04810	770	UniRef100_I1K850 Uncharacterized protein n=1 Tax=Glycine max RepID=I1K850_SOYBN	0	99.87	UniRef100_D3YBD3 Proteinase inhibitor n=1 Tax=Trifolium repens RepID=D3YBD3_TRIRP	0	99.35	AT5G67360.1 | Symbols: ARA12 | Subtilase family protein | chr5:26872192-26874465 REVERSE LENGTH=757	0	95.32	GO:0006508 GO:0010214 GO:0043086 GO:0048359 GO:0080001	proteolysis; seed coat development; negative regulation of catalytic activity; mucilage metabolic process involved seed coat development; mucilage extrusion from seed coat	GO:0004252 GO:0042802	serine-type endopeptidase activity; identical protein binding	GO:0005576 GO:0005618 GO:0009505 GO:0048046	extracellular region; cell wall; plant-type cell wall; apoplast	PF05922 PF00082 PF02225	Peptidase inhibitor I9; Subtilase family; PA domain	PTHR10795 PTHR10795:SF17	SUBTILISIN/KEXIN-RELATED SERINE PROTEASE; gb def: possible protease [sinorhizobium meliloti]	NA	NA	NA	NA	NA	NA
Glyma06g04820	934	UniRef100_UPI0002339D34 UPI0002339D34 related cluster n=1 Tax=unknown RepID=UPI0002339D34	0	99.89	UniRef100_D3YBD2 Transcription initiation factor n=1 Tax=Trifolium repens RepID=D3YBD2_TRIRP	0	98.18	AT5G43130.1 | Symbols: TAF4, TAF4B | TBP-associated factor 4 | chr5:17315608-17321144 REVERSE LENGTH=823	0	98.93	GO:0006352 GO:0009630	DNA-dependent transcription, initiation; gravitropism	NA	NA	GO:0005634 GO:0005669	nucleus; transcription factor TFIID complex	PF12174 PF05236	RST domain of plant C-terminal; Transcription initiation factor TFIID component TAF4 family	PTHR15138 PTHR15138:SF3	FAMILY NOT NAMED; SUBFAMILY NOT NAMED	NA	NA	NA	NA	NA	NA
Glyma06g04840	234	UniRef100_I0AW24 C2H2 zinc-finger protein (Fragment) n=1 Tax=Glycine max RepID=I0AW24_SOYBN	1e-170	99.57	UniRef100_I0AW24 C2H2 zinc-finger protein (Fragment) n=1 Tax=Glycine max RepID=I0AW24_SOYBN	1e-170	99.57	AT1G27730.1 | Symbols: STZ, ZAT10 | salt tolerance zinc finger | chr1:9648302-9648985 REVERSE LENGTH=227	1e-66	96.15	GO:0002679 GO:0006979 GO:0007165 GO:0009409 GO:0009414 GO:0009611 GO:0009612 GO:0009620 GO:0009644 GO:0009651 GO:0009695 GO:0009723 GO:0009733 GO:0009737 GO:0009738 GO:0009753 GO:0009873 GO:0010117 GO:0010200 GO:0015979 GO:0035264 GO:0035556 GO:0042538 GO:0045892	respiratory burst involved in defense response; response to oxidative stress; signal transduction; response to cold; response to water deprivation; response to wounding; response to mechanical stimulus; response to fungus; response to high light intensity; response to salt stress; jasmonic acid biosynthetic process; response to ethylene stimulus; response to auxin stimulus; response to abscisic a…	GO:0003676 GO:0003700 GO:0008270 GO:0043565	nucleic acid binding; sequence-specific DNA binding transcription factor activity; zinc ion binding; sequence-specific DNA binding	GO:0005634	nucleus	NA	NA	PTHR26374 PTHR26374:SF459	FAMILY NOT NAMED;	NA	NA	NA	NA	NA	NA
Glyma06g04850	236	UniRef100_I1K855 Uncharacterized protein n=1 Tax=Glycine max RepID=I1K855_SOYBN	3e-168	99.58	UniRef100_D3YBB6 Adeninephosphoribosyl transferase n=1 Tax=Trifolium repens RepID=D3YBB6_TRIRP	1e-109	77.12	AT1G27450.1 | Symbols: APT1, ATAPT1 | adenine phosphoribosyl transferase 1 | chr1:9532042-9533807 FORWARD LENGTH=243	3e-110	90.68	GO:0006094 GO:0006096 GO:0006168 GO:0007623 GO:0009116 GO:0009651 GO:0046686	gluconeogenesis; glycolysis; adenine salvage; circadian rhythm; nucleoside metabolic process; response to salt stress; response to cadmium ion	GO:0003999	adenine phosphoribosyltransferase activity	GO:0005737 GO:0005794 GO:0005829 GO:0005886 GO:0009505 GO:0009507 GO:0009570	cytoplasm; Golgi apparatus; cytosol; plasma membrane; plant-type cell wall; chloroplast; chloroplast stroma	PF00156	Phosphoribosyl transferase domain	PTHR11776	PHOSPHORIBOSYLTRANSFERASE	KOG1712	Adenine_phosphoribosyl_transferases	2.4.2.7	Adenine_phosphoribosyltransferase	K00759	adenine_phosphoribosyltransferase_[EC:2.4.2.7]
Glyma06g04860	850	UniRef100_I1JTQ4 Uncharacterized protein n=1 Tax=Glycine max RepID=I1JTQ4_SOYBN	0	99.88	UniRef100_B3H6L4 Ubiquitin system component Cue protein n=1 Tax=Arabidopsis thaliana RepID=B3H6L4_ARATH	0	99.88	AT1G27752.1 | Symbols: | Ubiquitin system component Cue protein | chr1:9662250-9667318 FORWARD LENGTH=873	0	99.88	NA	NA	NA	NA	NA	NA	PF02845	CUE domain	PTHR21494	ACTIVATING SIGNAL COINTEGRATOR 1 COMPLEX SUBUNIT 2 (ASC-1 COMPLEX SUBUNIT P100)	KOG4501	Transcription_coactivator_complex,_P100_component	NA	NA	NA	NA
Glyma06g04870	349	UniRef100_I1K858 Uncharacterized protein n=1 Tax=Glycine max RepID=I1K858_SOYBN	0	99.71	UniRef100_G7ICC6 F-box/kelch-repeat protein n=1 Tax=Medicago truncatula RepID=G7ICC6_MEDTR	4e-119	99.71	AT5G43190.1 | Symbols: | Galactose oxidase/kelch repeat superfamily protein | chr5:17340300-17341511 REVERSE LENGTH=403	9e-81	99.71	GO:0006511 GO:0006865 GO:0006869 GO:0015824	ubiquitin-dependent protein catabolic process; amino acid transport; lipid transport; proline transport	GO:0004842	ubiquitin-protein ligase activity	GO:0005634	nucleus	PF00646	F-box domain	NA	NA	NA	NA	NA	NA	NA	NA
Glyma06g04890	328	UniRef100_I1K860 Uncharacterized protein n=1 Tax=Glycine max RepID=I1K860_SOYBN	0	99.7	UniRef100_B9R706 E3 ubiquitin ligase PUB14, putative n=1 Tax=Ricinus communis RepID=B9R706_RICCO	3e-157	97.26	AT3G01400.1 | Symbols: | ARM repeat superfamily protein | chr3:151920-152987 FORWARD LENGTH=355	1e-155	97.26	GO:0008150	biological process	NA	NA	GO:0005737	cytoplasm	PF00514	Armadillo/beta-catenin-like repeat	PTHR23315 PTHR23315:SF35	BETA CATENIN-RELATED ARMADILLO REPEAT-CONTAINING; ARMADILLO/BETA-CATENIN REPEAT FAMILY PROTEIN	NA	NA	NA	NA	NA	NA
Glyma06g04900	1020	UniRef100_I1K861 Uncharacterized protein n=1 Tax=Glycine max RepID=I1K861_SOYBN	0	99.9	UniRef100_Q9FVE7 Plasma membrane Ca2+-ATPase n=1 Tax=Glycine max RepID=Q9FVE7_SOYBN	0	99.9	AT1G27770.1 | Symbols: ACA1, PEA1 | autoinhibited Ca2+-ATPase 1 | chr1:9671912-9676010 REVERSE LENGTH=1020	0	99.8	GO:0006754 GO:0006812 GO:0006816 GO:0006882 GO:0008152 GO:0009624 GO:0070588	ATP biosynthetic process; cation transport; calcium ion transport; cellular zinc ion homeostasis; metabolic process; response to nematode; calcium ion transmembrane transport	GO:0000166 GO:0003824 GO:0005262 GO:0005388 GO:0005516 GO:0005524 GO:0015662 GO:0016820 GO:0046872	nucleotide binding; catalytic activity; calcium channel activity; calcium-transporting ATPase activity; calmodulin binding; ATP binding; ATPase activity, coupled to transmembrane movement of ions, phosphorylative mechanism; hydrolase activity, acting on acid anhydrides, catalyzing transmembrane movement of substances; metal ion binding	GO:0005783 GO:0005886 GO:0009706 GO:0016020	endoplasmic reticulum; plasma membrane; chloroplast inner membrane; membrane	PF00689 PF00690 PF12515 PF00702 PF00122	Cation transporting ATPase, C-terminus; Cation transporter/ATPase, N-terminus; Ca2+-ATPase N terminal autoinhibitory domain; haloacid dehalogenase-like hydrolase; E1-E2 ATPase	PTHR24093 PTHR24093:SF73	FAMILY NOT NAMED; SUBFAMILY NOT NAMED	KOG0204	Calcium_transporting_ATPase	NA	NA	NA	NA
Glyma06g04910	315	UniRef100_UPI0002339D36 UPI0002339D36 related cluster n=1 Tax=unknown RepID=UPI0002339D36	0	99.68	UniRef100_D3YBB0 Cyclin d n=1 Tax=Trifolium repens RepID=D3YBB0_TRIRP	3e-111	99.05	AT4G37630.2 | Symbols: CYCD5;1 | cyclin d5;1 | chr4:17679497-17680788 FORWARD LENGTH=321	2e-48	97.14	GO:0000278 GO:0010440 GO:0042023 GO:0045736 GO:0051726	mitotic cell cycle; stomatal lineage progression; DNA endoreduplication; negative regulation of cyclin-dependent protein kinase activity; regulation of cell cycle	GO:0004693 GO:0005515	cyclin-dependent protein kinase activity; protein binding	GO:0005634	nucleus	PF00134 PF02984	Cyclin, N-terminal domain; Cyclin, C-terminal domain	PTHR10177 PTHR10177:SF76	CYCLINS; CYCLIN-D	KOG0656 KOG0794	G1/S-specific_cyclin_D CDK8_kinase-activating_protein_cyclin_C	NA	NA	NA	NA
Glyma06g04920	449	UniRef100_I1K863 Uncharacterized protein n=1 Tax=Glycine max RepID=I1K863_SOYBN	0	99.78	UniRef100_Q9SFY3 T22C5.21 n=1 Tax=Arabidopsis thaliana RepID=Q9SFY3_ARATH	2e-118	84.63	AT1G27760.3 | Symbols: SAT32, ATSAT32 | interferon-related developmental regulator family protein / IFRD protein family | chr1:9668895-9671322 FORWARD LENGTH=441	0	99.55	GO:0009651	response to salt stress	NA	NA	GO:0005634 GO:0005737	nucleus; cytoplasm	PF04836 PF05004	Interferon-related protein conserved region; Interferon-related developmental regulator (IFRD)	PTHR12354 PTHR12354:SF3	INTERFERON-RELATED DEVELOPMENTAL REGULATOR-RELATED; UNCHARACTERIZED	KOG2842	Interferon-related_protein_PC4_like	NA	NA	NA	NA
Glyma06g04930	448	UniRef100_I1K866 Uncharacterized protein n=1 Tax=Glycine max RepID=I1K866_SOYBN	0	99.78	UniRef100_B9R702 WD-repeat protein, putative n=1 Tax=Ricinus communis RepID=B9R702_RICCO	0	98.21	AT1G27840.1 | Symbols: ATCSA-1 | Transducin/WD40 repeat-like superfamily protein | chr1:9693332-9696257 REVERSE LENGTH=450	0	97.77	GO:0006281 GO:0010224	DNA repair; response to UV-B	GO:0000166	nucleotide binding	GO:0005634 GO:0005739 GO:0005834 GO:0080008	nucleus; mitochondrion; heterotrimeric G-protein complex; CUL4-RING ubiquitin ligase complex	PF00400	WD domain, G-beta repeat	PTHR22850 PTHR22850:SF2	WD40 REPEAT FAMILY; COCKAYNE SYNDROME WD-REPEAT PROTEIN CSA (DNA EXCISION REPAIR PROTEIN ERCC-8)	KOG4283	Transcription-coupled_repair_protein_CSA,_contains_WD40_domain	NA	NA	K10570	DNA_excision_repair_protein_ERCC-8
Glyma06g04950	716	UniRef100_I1K868 Uncharacterized protein n=1 Tax=Glycine max RepID=I1K868_SOYBN	0	99.86	UniRef100_B9R701 Calmodulin binding protein, putative n=1 Tax=Ricinus communis RepID=B9R701_RICCO	0	99.44	AT1G27460.1 | Symbols: NPGR1 | no pollen germination related 1 | chr1:9534977-9537424 FORWARD LENGTH=694	0	99.72	GO:0008150	biological process	GO:0005516	calmodulin binding	GO:0005634 GO:0005886	nucleus; plasma membrane	NA	NA	PTHR23083 PTHR23083:SF174	O-LINKED N-ACETYLGLUCOSAMINE TRANSFERASE, OGT; SUBFAMILY NOT NAMED	KOG4162	Predicted_calmodulin-binding_protein	NA	NA	NA	NA
Glyma06g04960	257	UniRef100_I1K869 Uncharacterized protein (Fragment) n=1 Tax=Glycine max RepID=I1K869_SOYBN	8e-127	96.11	UniRef100_Q9SY64 F14N23.10 n=2 Tax=Arabidopsis thaliana RepID=Q9SY64_ARATH	5e-16	57.98	AT1G59590.1 | Symbols: ZCF37 | ZCF37 | chr1:21887860-21888495 FORWARD LENGTH=211	1e-35	77.43	NA	NA	NA	NA	GO:0005739	mitochondrion	NA	NA	NA	NA	NA	NA	NA	NA	NA	NA
Glyma06g04970	298	UniRef100_UPI0002339D38 UPI0002339D38 related cluster n=1 Tax=unknown RepID=UPI0002339D38	0	99.66	UniRef100_B9R6Z6 XPA-binding protein, putative n=1 Tax=Ricinus communis RepID=B9R6Z6_RICCO	0	94.63	AT5G22370.2 | Symbols: EMB1705, QQT1 | P-loop containing nucleoside triphosphate hydrolases superfamily protein | chr5:7406587-7408509 FORWARD LENGTH=298	0	98.99	GO:0007346 GO:0009790 GO:0009793 GO:0051301	regulation of mitotic cell cycle; embryo development; embryo development ending in seed dormancy; cell division	GO:0000166 GO:0005524	nucleotide binding; ATP binding	GO:0005634 GO:0005874	nucleus; microtubule	PF03029	Conserved hypothetical ATP binding protein	PTHR21231 PTHR21231:SF3	XPA-BINDING PROTEIN 1-RELATED; XPA-BINDING PROTEIN 1-RELATED	KOG1533	Predicted_GTPase	NA	NA	K06883	7-cyano-7-deazaguanine_reductase_[EC:1.7.1.13]
Glyma06g04980	197	UniRef100_C6SYL2 Uncharacterized protein n=1 Tax=Glycine max RepID=C6SYL2_SOYBN	2e-142	99.49	UniRef100_B7FH07 Transcription factor lim1 n=1 Tax=Medicago truncatula RepID=B7FH07_MEDTR	5e-125	99.49	AT1G10200.1 | Symbols: WLIM1 | GATA type zinc finger transcription factor family protein | chr1:3346677-3347763 REVERSE LENGTH=190	5e-117	98.48	GO:0006944 GO:0051017	cellular membrane fusion; actin filament bundle assembly	GO:0003700 GO:0008270 GO:0051015	sequence-specific DNA binding transcription factor activity; zinc ion binding; actin filament binding	GO:0005737 GO:0005886 GO:0015629	cytoplasm; plasma membrane; actin cytoskeleton	PF00412	LIM domain	PTHR25901 PTHR24206 PTHR24206:SF66	FAMILY NOT NAMED; FAMILY NOT NAMED;	KOG1700	Regulatory_protein_MLP_and_related_LIM_proteins	NA	NA	NA	NA
Glyma06g04990	537	UniRef100_UPI0002339D39 UPI0002339D39 related cluster n=1 Tax=unknown RepID=UPI0002339D39	0	99.81	UniRef100_G7JW84 Xanthine/uracil/vitamin C permease n=1 Tax=Medicago truncatula RepID=G7JW84_MEDTR	0	97.21	AT1G65550.1 | Symbols: | Xanthine/uracil permease family protein | chr1:24367694-24370800 REVERSE LENGTH=541	0	96.28	GO:0006810 GO:0055085	transport; transmembrane transport	GO:0005215 GO:0022857	transporter activity; transmembrane transporter activity	GO:0005886 GO:0016020	plasma membrane; membrane	PF00860	Permease family	PTHR11119 PTHR11119:SF8	PURINE PERMEASE; SODIUM-DEPENDENT VITAMIN C TRANSPORTER	KOG1292	Xanthine/uracil_transporters	NA	NA	NA	NA
Glyma06g05010	184	UniRef100_UPI0002339D3B UPI0002339D3B related cluster n=1 Tax=unknown RepID=UPI0002339D3B	3e-132	99.46	NA	NA	NA	AT1G58460.1 | Symbols: | unknown protein; Has 35 Blast hits to 35 proteins in 8 species: Archae - 0; Bacteria - 0; Metazoa - 0; Fungi - 0; Plants - 35; Viruses - 0; Other Eukaryotes - 0 (source: NCBI BLink). | chr1:21721404-21722429 FORWARD LENGTH=177	4e-12	64.13	GO:0008150	biological process	GO:0003674	molecular function	GO:0005634	nucleus	NA	NA	NA	NA	NA	NA	NA	NA	NA	NA
Glyma06g05020	504	UniRef100_I1K879 Uncharacterized protein n=1 Tax=Glycine max RepID=I1K879_SOYBN	0	85.91	UniRef100_G7ILY2 Serine carboxypeptidase-like protein n=1 Tax=Medicago truncatula RepID=G7ILY2_MEDTR	0	93.45	AT5G09640.1 | Symbols: SNG2, SCPL19 | serine carboxypeptidase-like 19 | chr5:2988373-2990966 FORWARD LENGTH=465	4e-169	92.46	GO:0006508 GO:0019748	proteolysis; secondary metabolic process	GO:0004185 GO:0016752	serine-type carboxypeptidase activity; sinapoyltransferase activity	GO:0005576	extracellular region	PF00450	Serine carboxypeptidase	PTHR11802 PTHR11802:SF7	SERINE PROTEASE FAMILY S10 SERINE CARBOXYPEPTIDASE; SERINE CARBOXYPEPTIDASE I (PLANTS)	KOG1282	Serine_carboxypeptidases_(lysosomal_cathepsin_A)	NA	NA	NA	NA
Glyma06g05030	157	UniRef100_C6TB21 Uncharacterized protein n=1 Tax=Glycine max RepID=C6TB21_SOYBN	7e-111	99.36	UniRef100_Q75KB0 Expressed protein n=1 Tax=Oryza sativa Japonica Group RepID=Q75KB0_ORYSJ	9e-10	92.99	AT1G58420.1 | Symbols: | Uncharacterised conserved protein UCP031279 | chr1:21707407-21707946 FORWARD LENGTH=179	7e-21	94.9	GO:0008150	biological process	GO:0003674	molecular function	GO:0005739	mitochondrion	NA	NA	NA	NA	NA	NA	NA	NA	NA	NA
Glyma06g05040	444	UniRef100_I1K884 Uncharacterized protein n=1 Tax=Glycine max RepID=I1K884_SOYBN	0	99.77	UniRef100_Q71CE5 Lecithine cholesterol acyltransferase-like protein n=1 Tax=Medicago truncatula RepID=Q71CE5_MEDTR	0	98.2	AT1G27480.1 | Symbols: | alpha/beta-Hydrolases superfamily protein | chr1:9544607-9546168 FORWARD LENGTH=432	0	93.92	GO:0006629 GO:0016556 GO:0030003 GO:0070838	lipid metabolic process; mRNA modification; cellular cation homeostasis; divalent metal ion transport	GO:0004607 GO:0008374	phosphatidylcholine-sterol O-acyltransferase activity; O-acyltransferase activity	GO:0005576 GO:0005773 GO:0005774	extracellular region; vacuole; vacuolar membrane	PF02450	Lecithin:cholesterol acyltransferase	PTHR11440 PTHR11440:SF12	LECITHIN-CHOLESTEROL ACYLTRANSFERASE-RELATED; PHOSPHATIDYLCHOLINE-STEROL ACYLTRANSFERASE-RELATED	KOG2369	Lecithin:cholesterol_acyltransferase_(LCAT)/Acyl-ceramide_synthase	NA	NA	NA	NA
Glyma06g05050	426	UniRef100_I1K885 Uncharacterized protein n=1 Tax=Glycine max RepID=I1K885_SOYBN	0	99.77	UniRef100_G7IBA8 U-box domain-containing protein n=1 Tax=Medicago truncatula RepID=G7IBA8_MEDTR	0	94.6	AT3G49810.1 | Symbols: | ARM repeat superfamily protein | chr3:18474936-18476282 REVERSE LENGTH=448	9e-179	95.31	GO:0016567	protein ubiquitination	GO:0004842	ubiquitin-protein ligase activity	GO:0000151 GO:0005634	ubiquitin ligase complex; nucleus	PF04564	U-box domain	PTHR22849	WDSAM1 PROTEIN	NA	NA	NA	NA	NA	NA
Glyma06g05060	419	UniRef100_I1K886 Uncharacterized protein n=1 Tax=Glycine max RepID=I1K886_SOYBN	0	99.76	UniRef100_Q9SGX8 F20B24.15 n=1 Tax=Arabidopsis thaliana RepID=Q9SGX8_ARATH	1e-62	82.82	AT1G10720.1 | Symbols: | BSD domain-containing protein | chr1:3562964-3564446 FORWARD LENGTH=429	8e-65	82.82	GO:0008150	biological process	GO:0003674	molecular function	GO:0005634	nucleus	PF03909	BSD domain	NA	NA	NA	NA	NA	NA	NA	NA
Glyma06g05070	411	UniRef100_I1K887 Uncharacterized protein n=1 Tax=Glycine max RepID=I1K887_SOYBN	0	99.76	UniRef100_Q9SY57 Protein PHLOEM PROTEIN 2-LIKE A10 n=1 Tax=Arabidopsis thaliana RepID=P2A10_ARATH	1e-138	98.05	AT1G10150.1 | Symbols: | Carbohydrate-binding protein | chr1:3326160-3327404 FORWARD LENGTH=414	3e-141	98.05	NA	NA	GO:0030246	carbohydrate binding	GO:0005739	mitochondrion	NA	NA	PTHR21477 PTHR21477:SF2	FAMILY NOT NAMED; SUBFAMILY NOT NAMED	NA	NA	NA	NA	NA	NA
Glyma06g05090	119	UniRef100_I1K888 Uncharacterized protein n=1 Tax=Glycine max RepID=I1K888_SOYBN	3e-78	99.16	NA	NA	NA	NA	NA	NA	NA	NA	NA	NA	NA	NA	NA	NA	NA	NA	NA	NA	NA	NA	NA	NA
Glyma06g05100	399	UniRef100_I1K889 Uncharacterized protein n=1 Tax=Glycine max RepID=I1K889_SOYBN	0	99.75	UniRef100_B9R6W6 Cw7 protein, putative n=1 Tax=Ricinus communis RepID=B9R6W6_RICCO	0	98.25	AT1G59520.1 | Symbols: CW7 | CW7 | chr1:21861589-21866016 FORWARD LENGTH=388	5e-175	96.99	GO:0008150	biological process	GO:0003674	molecular function	GO:0005634	nucleus	PF09741	Uncharacterized conserved protein (DUF2045)	PTHR21477 PTHR21477:SF3	FAMILY NOT NAMED; gb def: CW7 protein (At1g59520)	KOG2465	Uncharacterized_conserved_protein	NA	NA	NA	NA
Glyma06g05120	383	UniRef100_I1K892 Uncharacterized protein n=1 Tax=Glycine max RepID=I1K892_SOYBN	0	99.74	NA	NA	NA	NA	NA	NA	NA	NA	NA	NA	NA	NA	NA	NA	NA	NA	NA	NA	NA	NA	NA	NA
Glyma06g05130	49	NA	NA	NA	NA	NA	NA	NA	NA	NA	NA	NA	NA	NA	NA	NA	NA	NA	NA	NA	NA	NA	NA	NA	NA	NA
Glyma06g05150	379	UniRef100_I1K893 Uncharacterized protein n=1 Tax=Glycine max RepID=I1K893_SOYBN	0	99.74	UniRef100_B9R6V8 DAZ-associated protein, putative n=1 Tax=Ricinus communis RepID=B9R6V8_RICCO	7e-81	98.42	AT1G58470.1 | Symbols: ATRBP1, RBP1 | RNA-binding protein 1 | chr1:21727374-21728539 FORWARD LENGTH=360	8e-66	75.73	GO:0008283	cell proliferation	GO:0000166 GO:0003676 GO:0003723 GO:0003727	nucleotide binding; nucleic acid binding; RNA binding; single-stranded RNA binding	GO:0005737	cytoplasm	PF00076	RNA recognition motif. (a.k.a. RRM, RBD, or RNP domain)	PTHR24012 PTHR24012:SF14	FAMILY NOT NAMED; SUBFAMILY NOT NAMED	KOG4205	RNA-binding_protein_musashi/mRNA_cleavage_and_polyadenylation_factor_I_complex,_subunit_HRP1	NA	NA	K14411	RNA-binding_protein_Musashi
Glyma06g05170	661	UniRef100_UPI0002339D3D UPI0002339D3D related cluster n=1 Tax=unknown RepID=UPI0002339D3D	0	99.85	UniRef100_B9H6Q2 AP2 domain-containing transcription factor n=1 Tax=Populus trichocarpa RepID=B9H6Q2_POPTR	0	93.65	AT4G37750.1 | Symbols: ANT, DRG, CKC, CKC1 | Integrase-type DNA-binding superfamily protein | chr4:17739782-17742189 FORWARD LENGTH=555	1e-159	73.22	GO:0006306 GO:0006346 GO:0006355 GO:0007276 GO:0009855 GO:0009887 GO:0009944 GO:0009965 GO:0010014 GO:0010051 GO:0010073 GO:0010089 GO:0010492 GO:0016246 GO:0031047 GO:0042127 GO:0044036 GO:0048439 GO:0048519	DNA methylation; methylation-dependent chromatin silencing; regulation of transcription, DNA-dependent; gamete generation; determination of bilateral symmetry; organ morphogenesis; polarity specification of adaxial/abaxial axis; leaf morphogenesis; meristem initiation; xylem and phloem pattern formation; meristem maintenance; xylem development; maintenance of shoot apical meristem identity; RNA i…	GO:0003677 GO:0003700	DNA binding; sequence-specific DNA binding transcription factor activity	GO:0005634	nucleus	PF00847	AP2 domain	PTHR11795 PTHR11795:SF332	PROTEIN KINASE;	NA	NA	NA	NA	K09285	AP2-like_factor,_ANT_lineage
Glyma06g05190	707	UniRef100_I1K896 Uncharacterized protein n=1 Tax=Glycine max RepID=I1K896_SOYBN	0	99.86	UniRef100_B9R6U7 Transferase, transferring glycosyl groups, putative n=1 Tax=Ricinus communis RepID=B9R6U7_RICCO	0	99.43	AT4G07960.1 | Symbols: ATCSLC12, CSLC12 | Cellulose-synthase-like C12 | chr4:4802628-4805114 REVERSE LENGTH=699	0	99.43	NA	NA	GO:0016757 GO:0016759	transferase activity, transferring glycosyl groups; cellulose synthase activity	GO:0005794 GO:0009506	Golgi apparatus; plasmodesma	PF00535	Glycosyl transferase family 2	PTHR10587 PTHR10587:SF35	N-ACETYLGLUCOSAMINYLTRANSFERASE-RELATED; XYLOGLUCAN GLYCOSYLTRANSFERASE	NA	NA	NA	NA	NA	NA
Glyma06g05200	526	UniRef100_I1K897 Uncharacterized protein n=1 Tax=Glycine max RepID=I1K897_SOYBN	0	99.81	UniRef100_Q8GSM8 Squalene monooxygenase 1 n=1 Tax=Medicago truncatula RepID=Q8GSM8_MEDTR	0	99.43	AT1G58440.1 | Symbols: XF1, SQE1 | FAD/NAD(P)-binding oxidoreductase family protein | chr1:21714094-21717246 REVERSE LENGTH=531	0	91.44	GO:0000271 GO:0008152 GO:0009228 GO:0009414 GO:0016126 GO:0016132 GO:0019745 GO:0055114	polysaccharide biosynthetic process; metabolic process; thiamine biosynthetic process; response to water deprivation; sterol biosynthetic process; brassinosteroid biosynthetic process; pentacyclic triterpenoid biosynthetic process; oxidation-reduction process	GO:0004506 GO:0016491 GO:0050660	squalene monooxygenase activity; oxidoreductase activity; flavin adenine dinucleotide binding	GO:0005576 GO:0016021	extracellular region; integral to membrane	PF00890 PF08491	FAD binding domain; Squalene epoxidase	PTHR10835	SQUALENE MONOOXYGENASE	KOG1298	Squalene_monooxygenase	NA	NA	NA	NA
Glyma06g05210	222	UniRef100_I1K898 Uncharacterized protein n=1 Tax=Glycine max RepID=I1K898_SOYBN	3e-162	99.55	UniRef100_B9R6V3 Heat shock protein binding protein, putative n=1 Tax=Ricinus communis RepID=B9R6V3_RICCO	2e-99	95.5	AT4G07990.1 | Symbols: | Chaperone DnaJ-domain superfamily protein | chr4:4825650-4828937 REVERSE LENGTH=230	2e-88	93.24	GO:0006457 GO:0009644 GO:0042542	protein folding; response to high light intensity; response to hydrogen peroxide	GO:0031072	heat shock protein binding	GO:0005737	cytoplasm	PF00226	DnaJ domain	PTHR25040 PTHR25040:SF165	FAMILY NOT NAMED;	NA	NA	NA	NA	NA	NA
Glyma06g05220	260	UniRef100_I1K8A1 Uncharacterized protein n=1 Tax=Glycine max RepID=I1K8A1_SOYBN	0	99.62	UniRef100_Q9FH88 Emb|CAB66910.1 n=1 Tax=Arabidopsis thaliana RepID=Q9FH88_ARATH	1e-87	80	AT5G65810.1 | Symbols: | unknown protein; BEST Arabidopsis thaliana protein match is: unknown protein (TAIR:AT3G49720.2); Has 30201 Blast hits to 17322 proteins in 780 species: Archae - 12; Bacteria - 1396; Metazoa - 17338; Fungi - 3422; Plants - 5037; Viruses - 0; Other Eukaryotes - 2996 (source: NCBI BLink). | chr5:26337833-26339144 REVERSE LENGTH=258	3e-121	99.62	GO:0010394 GO:0045488	homogalacturonan metabolic process; pectin metabolic process	GO:0003674	molecular function	GO:0000139 GO:0005768 GO:0005794 GO:0005802	Golgi membrane; endosome; Golgi apparatus; trans-Golgi network	NA	NA	NA	NA	NA	NA	NA	NA	NA	NA
Glyma06g05240	468	UniRef100_UPI0002339D3F UPI0002339D3F related cluster n=1 Tax=unknown RepID=UPI0002339D3F	0	99.79	UniRef100_B9GNK7 1-aminocyclopropane-1-carboxylate n=1 Tax=Populus trichocarpa RepID=B9GNK7_POPTR	0	95.73	AT4G37770.1 | Symbols: ACS8 | 1-amino-cyclopropane-1-carboxylate synthase 8 | chr4:17752222-17753925 FORWARD LENGTH=469	0	95.94	GO:0009058 GO:0009693 GO:0010200 GO:0042218	biosynthetic process; ethylene biosynthetic process; response to chitin; 1-aminocyclopropane-1-carboxylate biosynthetic process	GO:0003824 GO:0005515 GO:0016740 GO:0016847 GO:0030170 GO:0042802	catalytic activity; protein binding; transferase activity; 1-aminocyclopropane-1-carboxylate synthase activity; pyridoxal phosphate binding; identical protein binding	GO:0005737	cytoplasm	PF00155	Aminotransferase class I and II	PTHR11751 PTHR11751:SF26	SUBGROUP I AMINOTRANSFERASE RELATED; TRANSCRIPTION REGULATOR AMINOTRANSFERASE GNTR-RELATED	KOG0256	1-aminocyclopropane-1-carboxylate_synthase,_and_related_proteins	4.4.1.14	1-aminocyclopropane-1-carboxylate_synthase	K01762	1-aminocyclopropane-1-carboxylate_synthase_[EC:4.4.1.14]
Glyma06g05260	356	UniRef100_I1JTU0 Uncharacterized protein n=1 Tax=Glycine max RepID=I1JTU0_SOYBN	0	99.72	UniRef100_Q0PJD7 MYB transcription factor MYB161 (Fragment) n=2 Tax=Glycine max RepID=Q0PJD7_SOYBN	1e-142	55.62	AT3G49690.1 | Symbols: RAX3, MYB84, ATMYB84 | myb domain protein 84 | chr3:18427941-18429100 FORWARD LENGTH=310	1e-86	91.29	GO:0006355 GO:0009751	regulation of transcription, DNA-dependent; response to salicylic acid stimulus	GO:0003677 GO:0003700	DNA binding; sequence-specific DNA binding transcription factor activity	GO:0005634	nucleus	PF00249	Myb-like DNA-binding domain	PTHR10641	MYB-RELATED	KOG0048	Transcription_factor,_Myb_superfamily	NA	NA	K09422	myb_proto-oncogene_protein,_plant
Glyma06g05280	463	UniRef100_C6TLT9 Branched-chain-amino-acid aminotransferase n=3 Tax=Glycine max RepID=C6TLT9_SOYBN	0	83.8	UniRef100_C6TLT9 Branched-chain-amino-acid aminotransferase n=3 Tax=Glycine max RepID=C6TLT9_SOYBN	0	83.8	AT1G10070.2 | Symbols: ATBCAT-2, BCAT-2 | branched-chain amino acid transaminase 2 | chr1:3288255-3290164 FORWARD LENGTH=388	0	82.51	GO:0008152 GO:0009081 GO:0009407 GO:0009744 GO:0009750	metabolic process; branched-chain amino acid metabolic process; toxin catabolic process; response to sucrose stimulus; response to fructose stimulus	GO:0003824 GO:0004084	catalytic activity; branched-chain-amino-acid transaminase activity	GO:0005737 GO:0005739 GO:0009507	cytoplasm; mitochondrion; chloroplast	PF01063	Aminotransferase class IV	PTHR11825 PTHR11825:SF2	SUBGROUP IIII AMINOTRANSFERASE; BRANCHED-CHAIN AMINO ACID AMINOTRANSFERASE	KOG0975	Branched_chain_aminotransferase_BCAT1,_pyridoxal_phosphate_enzymes_type_IV_superfamily	2.6.1.42	Branched-chain_amino_acid_aminotransferase.	K00826	branched-chain_amino_acid_aminotransferase_[EC:2.6.1.42]
Glyma06g05290	743	UniRef100_I1K8B0 Uncharacterized protein n=2 Tax=Glycine max RepID=I1K8B0_SOYBN	0	99.87	UniRef100_Q9SM08 F19C14.2 protein n=1 Tax=Arabidopsis thaliana RepID=Q9SM08_ARATH	0	98.38	AT1G58370.1 | Symbols: RXF12, ATXYN1 | glycosyl hydrolase family 10 protein / carbohydrate-binding domain-containing protein | chr1:21684751-21688209 FORWARD LENGTH=917	0	98.38	GO:0005975 GO:0010413 GO:0045492	carbohydrate metabolic process; glucuronoxylan metabolic process; xylan biosynthetic process	GO:0003824 GO:0004553 GO:0016798 GO:0031176 GO:0043169	catalytic activity; hydrolase activity, hydrolyzing O-glycosyl compounds; hydrolase activity, acting on glycosyl bonds; endo-1,4-beta-xylanase activity; cation binding	GO:0005576 GO:0005618	extracellular region; cell wall	PF02018 PF00331	Carbohydrate binding domain; Glycosyl hydrolase family 10	NA	NA	NA	NA	NA	NA	NA	NA
Glyma06g05300	254	UniRef100_I1K8B1 Uncharacterized protein n=1 Tax=Glycine max RepID=I1K8B1_SOYBN	0	99.61	UniRef100_G7J714 Zinc finger CCCH domain-containing protein n=1 Tax=Medicago truncatula RepID=G7J714_MEDTR	2e-88	99.21	AT2G19810.1 | Symbols: | CCCH-type zinc finger family protein | chr2:8550419-8551498 FORWARD LENGTH=359	4e-78	98.03	GO:0006355 GO:0006661 GO:0006979 GO:0015996	regulation of transcription, DNA-dependent; phosphatidylinositol biosynthetic process; response to oxidative stress; chlorophyll catabolic process	GO:0003676 GO:0003700 GO:0008270	nucleic acid binding; sequence-specific DNA binding transcription factor activity; zinc ion binding	GO:0005634 GO:0005886	nucleus; plasma membrane	PF00642	Zinc finger C-x8-C-x5-C-x3-H type (and similar)	PTHR14493	UNKEMPT-RELATED	NA	NA	NA	NA	NA	NA
Glyma06g05310	375	UniRef100_I1K8B2 Uncharacterized protein (Fragment) n=1 Tax=Glycine max RepID=I1K8B2_SOYBN	0	92	UniRef100_G7J720 Carboxyl-terminal proteinase n=1 Tax=Medicago truncatula RepID=G7J720_MEDTR	2e-163	99.47	AT5G25950.1 | Symbols: | Protein of Unknown Function (DUF239) | chr5:9057929-9059860 REVERSE LENGTH=432	2e-107	96.27	GO:0008150	biological process	NA	NA	GO:0005575	cellular component	PF03080	Arabidopsis proteins of unknown function	NA	NA	NA	NA	NA	NA	NA	NA
Glyma06g05320	84	NA	NA	NA	NA	NA	NA	NA	NA	NA	NA	NA	NA	NA	NA	NA	NA	NA	NA	NA	NA	NA	NA	NA	NA	NA
Glyma06g05330	62	NA	NA	NA	NA	NA	NA	NA	NA	NA	NA	NA	NA	NA	NA	NA	NA	NA	NA	NA	NA	NA	NA	NA	NA	NA
Glyma06g05350	485	UniRef100_I1K8B5 Uncharacterized protein n=1 Tax=Glycine max RepID=I1K8B5_SOYBN	0	99.79	UniRef100_Q9XFZ4 Asparaginyl endopeptidase (VmPE-1) n=1 Tax=Vigna mungo RepID=Q9XFZ4_VIGMU	0	99.79	AT4G32940.1 | Symbols: GAMMA-VPE, GAMMAVPE | gamma vacuolar processing enzyme | chr4:15900557-15903161 REVERSE LENGTH=494	0	95.26	GO:0006508 GO:0006624 GO:0006944 GO:0048193	proteolysis; vacuolar protein processing; cellular membrane fusion; Golgi vesicle transport	GO:0004197	cysteine-type endopeptidase activity	GO:0000323 GO:0005576	lytic vacuole; extracellular region	PF01650	Peptidase C13 family	PTHR12000 PTHR12000:SF2	HEMOGLOBINASE FAMILY MEMBER; HEMOGLOBINASE	KOG1348	Asparaginyl_peptidases	3.4.22.34	Legumain	K01369	legumain_[EC:3.4.22.34]
Glyma06g05360	254	UniRef100_I1K8B7 Uncharacterized protein n=1 Tax=Glycine max RepID=I1K8B7_SOYBN	0	99.61	UniRef100_G7JMS7 DNA-directed RNA polymerase n=1 Tax=Medicago truncatula RepID=G7JMS7_MEDTR	3e-74	99.61	AT3G20430.1 | Symbols: | CONTAINS InterPro DOMAIN/s: Phosphorylated adapter RNA export protein, RNA-binding domain (InterPro:IPR019385); Has 110 Blast hits to 110 proteins in 51 species: Archae - 0; Bacteria - 3; Metazoa - 56; Fungi - 0; Plants - 36; Viruses - 0; Other Eukaryotes - 15 (source: NCBI BLink). | chr3:7121480-7123074 FORWARD LENGTH=265	1e-66	99.21	GO:0008150	biological process	GO:0003674	molecular function	GO:0005634	nucleus	PF10258	PHAX RNA-binding domain	PTHR13135	CYTOSOLIC RESINIFERATOXIN BINDING PROTEIN RBP-26	KOG3948	Mediator_of_U_snRNA_nuclear_export_PHAX	NA	NA	NA	NA
Glyma06g05370	344	UniRef100_I1K8B8 Uncharacterized protein n=1 Tax=Glycine max RepID=I1K8B8_SOYBN	0	99.71	UniRef100_B9RRV1 Protein phosphatase-2c, putative n=1 Tax=Ricinus communis RepID=B9RRV1_RICCO	2e-146	98.55	AT5G36250.1 | Symbols: | Protein phosphatase 2C family protein | chr5:14282590-14284376 FORWARD LENGTH=448	7e-104	88.37	GO:0006470	protein dephosphorylation	GO:0004721 GO:0004722 GO:0005515	phosphoprotein phosphatase activity; protein serine/threonine phosphatase activity; protein binding	GO:0005634 GO:0005739 GO:0005886	nucleus; mitochondrion; plasma membrane	PF00481	Protein phosphatase 2C	PTHR13832 PTHR13832:SF94	PROTEIN PHOSPHATASE 2C; PROTEIN PHOSPHATASE 2C DELTA	KOG0698	Serine/threonine_protein_phosphatase	NA	NA	NA	NA
Glyma06g05380	280	UniRef100_I1K8B9 Uncharacterized protein n=1 Tax=Glycine max RepID=I1K8B9_SOYBN	0	99.64	NA	NA	NA	AT4G32960.1 | Symbols: | unknown protein; BEST Arabidopsis thaliana protein match is: unknown protein (TAIR:AT4G32970.1); Has 106 Blast hits to 106 proteins in 39 species: Archae - 0; Bacteria - 0; Metazoa - 62; Fungi - 0; Plants - 37; Viruses - 0; Other Eukaryotes - 7 (source: NCBI BLink). | chr4:15908785-15910141 REVERSE LENGTH=264	5e-114	88.57	GO:0006635 GO:0008150 GO:0016558	fatty acid beta-oxidation; biological process; protein import into peroxisome matrix	GO:0003674	molecular function	GO:0005634	nucleus	NA	NA	NA	NA	NA	NA	NA	NA	NA	NA
Glyma06g05390	483	UniRef100_I1K8C0 Ferrochelatase n=1 Tax=Glycine max RepID=I1K8C0_SOYBN	0	99.79	UniRef100_I1K8C0 Ferrochelatase n=1 Tax=Glycine max RepID=I1K8C0_SOYBN	0	99.79	AT5G26030.2 | Symbols: FC1, FC-I, ATFC-I | ferrochelatase 1 | chr5:9096675-9098752 FORWARD LENGTH=466	0	99.17	GO:0006612 GO:0006783 GO:0006944 GO:0006979 GO:0009611 GO:0010363 GO:0019243 GO:0030968 GO:0033014 GO:0043069 GO:0052542	protein targeting to membrane; heme biosynthetic process; cellular membrane fusion; response to oxidative stress; response to wounding; regulation of plant-type hypersensitive response; methylglyoxal catabolic process to D-lactate; endoplasmic reticulum unfolded protein response; tetrapyrrole biosynthetic process; negative regulation of programmed cell death; defense response by callose deposition	GO:0004325	ferrochelatase activity	GO:0005739 GO:0009507 GO:0009536	mitochondrion; chloroplast; plastid	PF00762	Ferrochelatase	PTHR11108	FERROCHELATASE	KOG1321	Protoheme_ferro-lyase_(ferrochelatase)	4.99.1.1	Ferrochelatase	K01772	ferrochelatase_[EC:4.99.1.1]
Glyma06g05400	555	UniRef100_UPI0001B63B87 UPI0001B63B87 related cluster n=1 Tax=unknown RepID=UPI0001B63B87	0	99.82	UniRef100_G7J7L9 Far upstream element-binding protein n=1 Tax=Medicago truncatula RepID=G7J7L9_MEDTR	0	99.82	AT2G25970.1 | Symbols: | KH domain-containing protein | chr2:11071844-11075604 REVERSE LENGTH=632	4e-131	98.38	GO:0006606	protein import into nucleus	GO:0003676 GO:0003723	nucleic acid binding; RNA binding	GO:0005829	cytosol	PF00013	KH domain	PTHR10288 PTHR10288:SF53	RNA-BINDING PROTEIN RELATED; KH DOMAIN-CONTAINING PROTEIN	KOG1676	K-homology_type_RNA_binding_proteins	NA	NA	NA	NA
Glyma06g05410	214	UniRef100_I1K8C1 Uncharacterized protein n=1 Tax=Glycine max RepID=I1K8C1_SOYBN	2e-155	99.53	UniRef100_B9RRU5 NADH-plastoquinone oxidoreductase, putative n=1 Tax=Ricinus communis RepID=B9RRU5_RICCO	1e-129	99.53	AT5G11770.1 | Symbols: | NADH-ubiquinone oxidoreductase 20 kDa subunit, mitochondrial | chr5:3791148-3792929 REVERSE LENGTH=218	2e-123	99.53	GO:0006120 GO:0006486 GO:0006511 GO:0009853 GO:0051788 GO:0055114 GO:0080129	mitochondrial electron transport, NADH to ubiquinone; protein glycosylation; ubiquitin-dependent protein catabolic process; photorespiration; response to misfolded protein; oxidation-reduction process; proteasome core complex assembly	GO:0008137 GO:0008270 GO:0016651 GO:0048038 GO:0051539	NADH dehydrogenase (ubiquinone) activity; zinc ion binding; oxidoreductase activity, acting on NAD(P)H; quinone binding; 4 iron, 4 sulfur cluster binding	GO:0005739 GO:0005747	mitochondrion; mitochondrial respiratory chain complex I	PF01058	NADH ubiquinone oxidoreductase, 20 Kd subunit	PTHR11995	NADH DEHYDROGENASE	KOG1687	NADH-ubiquinone_oxidoreductase,_NUFS7/PSST/20_kDa_subunit	NA	NA	NA	NA
Glyma06g05420	345	UniRef100_C6T7K8 Uncharacterized protein n=1 Tax=Glycine max RepID=C6T7K8_SOYBN	0	99.71	UniRef100_G7IB94 Pollen-specific protein SF21 n=1 Tax=Medicago truncatula RepID=G7IB94_MEDTR	0	99.42	AT5G11790.1 | Symbols: NDL2 | N-MYC downregulated-like 2 | chr5:3799682-3802496 FORWARD LENGTH=344	0	98.84	GO:0030154	cell differentiation	GO:0003674	molecular function	GO:0005737	cytoplasm	PF03096	Ndr family	PTHR11034 PTHR11034:SF3	N-MYC DOWNSTREAM REGULATED; N-MYC DOWNSTREAM REGULATED-RELATED	KOG2931	Differentiation-related_gene_1_protein_(NDR1_protein),_related_proteins	NA	NA	NA	NA
Glyma06g05430	550	UniRef100_I1K8C3 Uncharacterized protein (Fragment) n=1 Tax=Glycine max RepID=I1K8C3_SOYBN	0	96.18	UniRef100_G7IB93 BEL1-like homeodomain protein n=1 Tax=Medicago truncatula RepID=G7IB93_MEDTR	0	99.09	AT4G32980.1 | Symbols: ATH1 | homeobox gene 1 | chr4:15914865-15916873 REVERSE LENGTH=473	9e-102	57.09	GO:0000096 GO:0006355 GO:0006546 GO:0006636 GO:0006733 GO:0006766 GO:0008285 GO:0008652 GO:0009072 GO:0009106 GO:0009108 GO:0009117 GO:0009416 GO:0009640 GO:0009695 GO:0009793 GO:0009965 GO:0010027 GO:0010073 GO:0010103 GO:0010227 GO:0010228 GO:0010371 GO:0015994 GO:0015995 GO:0016117 GO:0016226 GO:0016556 GO:0019216 GO:0019288 GO:0019748 GO:0030154 GO:0031408 GO:0044272 GO:0045893 GO:0048481 GO:…	sulfur amino acid metabolic process; regulation of transcription, DNA-dependent; glycine catabolic process; unsaturated fatty acid biosynthetic process; oxidoreduction coenzyme metabolic process; vitamin metabolic process; negative regulation of cell proliferation; cellular amino acid biosynthetic process; aromatic amino acid family metabolic process; lipoate metabolic process; coenzyme biosynthe…	GO:0003677 GO:0003700 GO:0005515 GO:0043565	DNA binding; sequence-specific DNA binding transcription factor activity; protein binding; sequence-specific DNA binding	GO:0005634	nucleus	PF07526 PF00046	Associated with HOX; Homeobox domain	PTHR11850 PTHR11850:SF14	HOMEOBOX PROTEIN; BEL1 HOMEOTIC PROTEIN	KOG0773	Transcription_factor_MEIS1_and_related_HOX_domain_proteins	NA	NA	NA	NA
Glyma06g05440	188	UniRef100_I1K8C4 Uncharacterized protein (Fragment) n=2 Tax=Glycine max RepID=I1K8C4_SOYBN	1e-123	91.49	UniRef100_D7LC42 Bet v I allergen family protein n=1 Tax=Arabidopsis lyrata subsp. lyrata RepID=D7LC42_ARALL	1e-89	94.15	AT2G26040.1 | Symbols: PYL2, RCAR14 | PYR1-like 2 | chr2:11094832-11095404 REVERSE LENGTH=190	6e-89	94.15	GO:0009062 GO:0009738	fatty acid catabolic process; abscisic acid mediated signaling pathway	GO:0004872 GO:0005515 GO:0042803	receptor activity; protein binding; protein homodimerization activity	GO:0005634	nucleus	PF10604	Polyketide cyclase / dehydrase and lipid transport	NA	NA	NA	NA	NA	NA	K14496	abscisic_acid_receptor_PYR/PYL_family
Glyma06g05450	242	UniRef100_I1K8C5 Uncharacterized protein n=2 Tax=Glycine max RepID=I1K8C5_SOYBN	1e-126	74.79	UniRef100_G7J7M5 MYB transcription factor n=1 Tax=Medicago truncatula RepID=G7J7M5_MEDTR	4e-68	92.15	AT5G56840.1 | Symbols: | myb-like transcription factor family protein | chr5:22980789-22982152 FORWARD LENGTH=233	1e-40	73.55	GO:0006355	regulation of transcription, DNA-dependent	GO:0003676 GO:0003677 GO:0003700 GO:0008270	nucleic acid binding; DNA binding; sequence-specific DNA binding transcription factor activity; zinc ion binding	GO:0005634	nucleus	PF00249	Myb-like DNA-binding domain	PTHR12374	TRANSCRIPTIONAL ADAPTOR 2 (ADA2)-RELATED	NA	NA	NA	NA	NA	NA
Glyma06g05460	464	UniRef100_I1K8C8 Uncharacterized protein n=2 Tax=Glycine max RepID=I1K8C8_SOYBN	0	89.66	UniRef100_G7J7M9 Cytochrome c oxidase subunit n=1 Tax=Medicago truncatula RepID=G7J7M9_MEDTR	0	81.25	AT1G60960.1 | Symbols: IRT3, ATIRT3 | iron regulated transporter 3 | chr1:22445410-22447060 REVERSE LENGTH=425	1e-177	89.66	GO:0006812 GO:0006826 GO:0006829 GO:0006833 GO:0009624 GO:0010106 GO:0030001 GO:0055085 GO:0071577	cation transport; iron ion transport; zinc ion transport; water transport; response to nematode; cellular response to iron ion starvation; metal ion transport; transmembrane transport; zinc ion transmembrane transport	GO:0005381 GO:0005385 GO:0008324 GO:0046873	iron ion transmembrane transporter activity; zinc ion transmembrane transporter activity; cation transmembrane transporter activity; metal ion transmembrane transporter activity	GO:0005774 GO:0005886 GO:0009507 GO:0016020 GO:0016021	vacuolar membrane; plasma membrane; chloroplast; membrane; integral to membrane	PF02535	ZIP Zinc transporter	PTHR11040 PTHR11040:SF1	ZINC-IRON TRANSPORTER; ZINC/IRON TRANSPORTER	KOG1558	Fe2+/Zn2+_regulated_transporter	NA	NA	NA	NA
Glyma06g05470	1024	UniRef100_UPI000233A29E UPI000233A29E related cluster n=1 Tax=unknown RepID=UPI000233A29E	0	99.9	UniRef100_G7I9Z0 Glycine dehydrogenase P protein n=1 Tax=Medicago truncatula RepID=G7I9Z0_MEDTR	0	99.9	AT2G26080.1 | Symbols: AtGLDP2, GLDP2 | glycine decarboxylase P-protein 2 | chr2:11109330-11113786 REVERSE LENGTH=1044	0	99.71	GO:0006544 GO:0019464 GO:0055114	glycine metabolic process; glycine decarboxylation via glycine cleavage system; oxidation-reduction process	GO:0003824 GO:0004375 GO:0005524 GO:0030170	catalytic activity; glycine dehydrogenase (decarboxylating) activity; ATP binding; pyridoxal phosphate binding	GO:0005739 GO:0005960 GO:0009507 GO:0009941 GO:0048046	mitochondrion; glycine cleavage complex; chloroplast; chloroplast envelope; apoplast	PF02347	Glycine cleavage system P-protein	PTHR11773	GLYCINE DEHYDROGENASE	KOG2040	Glycine_dehydrogenase_(decarboxylating)	1.4.4.2	Glycine_dehydrogenase_(decarboxylating)	K00281	glycine_dehydrogenase_[EC:1.4.4.2]
Glyma06g05480	277	UniRef100_I1K8D0 Uncharacterized protein n=3 Tax=Glycine max RepID=I1K8D0_SOYBN	0	99.64	UniRef100_F4JZD5 Alkaline phytoceramidase (APHC) n=2 Tax=Arabidopsis thaliana RepID=F4JZD5_ARATH	1e-103	96.39	AT5G11870.2 | Symbols: | Alkaline phytoceramidase (aPHC) | chr5:3825720-3827363 FORWARD LENGTH=270	3e-106	96.39	GO:0006672	ceramide metabolic process	GO:0016811	hydrolase activity, acting on carbon-nitrogen (but not peptide) bonds, in linear amides	GO:0005739 GO:0016021	mitochondrion; integral to membrane	PF05875	Alkaline phytoceramidase (aPHC)	NA	NA	NA	NA	NA	NA	NA	NA
Glyma06g05490	257	UniRef100_I1K8D2 Uncharacterized protein n=1 Tax=Glycine max RepID=I1K8D2_SOYBN	0	99.61	UniRef100_A2Q440 Harpin-induced 1 n=1 Tax=Medicago truncatula RepID=A2Q440_MEDTR	1e-50	98.05	AT5G11890.1 | Symbols: | FUNCTIONS IN: molecular_function unknown; LOCATED IN: plasma membrane; EXPRESSED IN: 12 plant structures; EXPRESSED DURING: 6 growth stages; BEST Arabidopsis thaliana protein match is: Late embryogenesis abundant (LEA) hydroxyproline-rich glycoprotein family (TAIR:AT1G17620.1); Has 1807 Blast hits to 1807 proteins in 277 species: Archae - 0; Bacteria - 0; Metazoa - 736; F…	3e-59	90.66	NA	NA	GO:0003674	molecular function	GO:0005634 GO:0005886	nucleus; plasma membrane	PF03168	Late embryogenesis abundant protein	NA	NA	NA	NA	NA	NA	NA	NA
Glyma06g05500	322	UniRef100_I1K8D3 Uncharacterized protein n=1 Tax=Glycine max RepID=I1K8D3_SOYBN	0	99.69	UniRef100_G7J7N8 ADP/ATP translocase-like protein n=1 Tax=Medicago truncatula RepID=G7J7N8_MEDTR	0	99.69	AT5G56450.1 | Symbols: | Mitochondrial substrate carrier family protein | chr5:22858772-22859764 REVERSE LENGTH=330	0	99.69	GO:0006810 GO:0006839 GO:0048653 GO:0055085	transport; mitochondrial transport; anther development; transmembrane transport	GO:0005215 GO:0005347	transporter activity; ATP transmembrane transporter activity	GO:0005739 GO:0005743	mitochondrion; mitochondrial inner membrane	PF00153	Mitochondrial carrier protein	PTHR24089 PTHR24089:SF155	FAMILY NOT NAMED;	KOG0749	Mitochondrial_ADP/ATP_carrier_proteins	NA	NA	K05863	solute_carrier_family_25_(mitochondrial_carrier;_adenine_nucleotide_translocator)
Glyma06g05510	141	UniRef100_I1K8D4 Uncharacterized protein n=1 Tax=Glycine max RepID=I1K8D4_SOYBN	2e-95	99.29	UniRef100_Q8L9S3 Glutaredoxin-C6 n=1 Tax=Arabidopsis thaliana RepID=GRXC6_ARATH	2e-50	90.78	AT4G33040.1 | Symbols: | Thioredoxin superfamily protein | chr4:15940779-15941213 REVERSE LENGTH=144	5e-53	90.78	GO:0045454 GO:0048653	cell redox homeostasis; anther development	GO:0009055 GO:0015035	electron carrier activity; protein disulfide oxidoreductase activity	GO:0005737	cytoplasm	PF00462	Glutaredoxin	PTHR10168 PTHR10168:SF47	GLUTAREDOXIN; GLUTAREDOXIN	KOG1752	Glutaredoxin_and_related_proteins	NA	NA	NA	NA
Glyma06g05520	549	UniRef100_UPI0002339D45 UPI0002339D45 related cluster n=1 Tax=unknown RepID=UPI0002339D45	0	99.82	UniRef100_Q2MIZ8 Cytochrome P450 71B10 n=1 Tax=Medicago truncatula RepID=Q2MIZ8_MEDTR	0	99.82	AT2G26170.1 | Symbols: CYP711A1, MAX1 | cytochrome P450, family 711, subfamily A, polypeptide 1 | chr2:11140851-11143270 FORWARD LENGTH=522	0	95.45	GO:0006612 GO:0009611 GO:0009805 GO:0009926 GO:0009934 GO:0009963 GO:0010223 GO:0010363 GO:0016117 GO:0055114	protein targeting to membrane; response to wounding; coumarin biosynthetic process; auxin polar transport; regulation of meristem structural organization; positive regulation of flavonoid biosynthetic process; secondary shoot formation; regulation of plant-type hypersensitive response; carotenoid biosynthetic process; oxidation-reduction process	GO:0005506 GO:0009055 GO:0016705 GO:0019825 GO:0020037	iron ion binding; electron carrier activity; oxidoreductase activity, acting on paired donors, with incorporation or reduction of molecular oxygen; oxygen binding; heme binding	NA	NA	PF00067	Cytochrome P450	PTHR24301 PTHR24301:SF127	FAMILY NOT NAMED;	KOG0158	Cytochrome_P450_CYP3/CYP5/CYP6/CYP9_subfamilies	NA	NA	NA	NA
Glyma06g05530	451	UniRef100_I1K8D6 Uncharacterized protein n=1 Tax=Glycine max RepID=I1K8D6_SOYBN	0	99.78	UniRef100_G7J7P3 IQ domain-containing protein n=1 Tax=Medicago truncatula RepID=G7J7P3_MEDTR	0	98.89	AT2G26180.1 | Symbols: IQD6 | IQ-domain 6 | chr2:11143433-11144982 REVERSE LENGTH=416	2e-139	97.34	NA	NA	GO:0005516	calmodulin binding	GO:0005634	nucleus	NA	NA	PTHR13140 PTHR13140:SF84	MYOSIN; MYOSIN VIII	NA	NA	NA	NA	NA	NA
Glyma06g05550	339	UniRef100_I1K8D7 Uncharacterized protein n=1 Tax=Glycine max RepID=I1K8D7_SOYBN	0	99.71	UniRef100_G7J7P6 Mitochondrial substrate carrier family protein B n=1 Tax=Medicago truncatula RepID=G7J7P6_MEDTR	0	99.41	AT1G14560.1 | Symbols: | Mitochondrial substrate carrier family protein | chr1:4981300-4983082 FORWARD LENGTH=331	2e-147	98.23	GO:0006810 GO:0006839 GO:0055085	transport; mitochondrial transport; transmembrane transport	GO:0005215	transporter activity	GO:0005739 GO:0005743	mitochondrion; mitochondrial inner membrane	PF00153	Mitochondrial carrier protein	PTHR24089 PTHR24089:SF104	FAMILY NOT NAMED; SUBFAMILY NOT NAMED	KOG0752	Mitochondrial_solute_carrier_protein	NA	NA	NA	NA
Glyma06g05560	214	UniRef100_I1K8D8 Uncharacterized protein n=1 Tax=Glycine max RepID=I1K8D8_SOYBN	1e-156	99.53	UniRef100_G7I9V5 Lysine decarboxylase-like protein n=1 Tax=Medicago truncatula RepID=G7I9V5_MEDTR	1e-135	99.53	AT5G11950.2 | Symbols: | Putative lysine decarboxylase family protein | chr5:3855072-3856815 FORWARD LENGTH=216	1e-125	98.6	GO:0009089	lysine biosynthetic process via diaminopimelate	GO:0042803	protein homodimerization activity	GO:0005634 GO:0005737 GO:0005829	nucleus; cytoplasm; cytosol	PF03641	Possible lysine decarboxylase	NA	NA	NA	NA	NA	NA	NA	NA
Glyma06g05570	339	UniRef100_I1K8D9 Uncharacterized protein n=1 Tax=Glycine max RepID=I1K8D9_SOYBN	0	99.71	NA	NA	NA	AT5G11960.1 | Symbols: | Protein of unknown function (DUF803) | chr5:3858852-3861462 REVERSE LENGTH=344	5e-169	99.41	GO:0008150	biological process	GO:0003674	molecular function	GO:0009507	chloroplast	PF05653	Protein of unknown function (DUF803)	NA	NA	KOG2922	Uncharacterized_conserved_protein	NA	NA	NA	NA
Glyma06g05580	414	UniRef100_UPI0001B63AA1 UPI0001B63AA1 related cluster n=1 Tax=unknown RepID=UPI0001B63AA1	0	99.76	UniRef100_Q40465 Eukaryotic initiation factor 4A-11 n=1 Tax=Nicotiana tabacum RepID=IF411_TOBAC	0	99.76	AT3G13920.1 | Symbols: EIF4A1, RH4, TIF4A1 | eukaryotic translation initiation factor 4A1 | chr3:4592635-4594128 REVERSE LENGTH=412	0	99.76	GO:0006094 GO:0006096 GO:0006413 GO:0009651 GO:0046686	gluconeogenesis; glycolysis; translational initiation; response to salt stress; response to cadmium ion	GO:0003676 GO:0003743 GO:0004386 GO:0005515 GO:0005524 GO:0008026	nucleic acid binding; translation initiation factor activity; helicase activity; protein binding; ATP binding; ATP-dependent helicase activity	GO:0005618 GO:0005634 GO:0005730 GO:0005737 GO:0005829 GO:0009506 GO:0016020 GO:0048046	cell wall; nucleus; nucleolus; cytoplasm; cytosol; plasmodesma; membrane; apoplast	PF00271 PF00270	Helicase conserved C-terminal domain; DEAD/DEAH box helicase	PTHR24031 PTHR24031:SF2	FAMILY NOT NAMED; SUBFAMILY NOT NAMED	KOG0328	Predicted_ATP-dependent_RNA_helicase_FAL1,_involved_in_rRNA_maturation,_DEAD-box_superfamily	NA	NA	K03257	translation_initiation_factor_eIF-4A
Glyma06g05590	116	UniRef100_C6SX84 Uncharacterized protein n=1 Tax=Glycine max RepID=C6SX84_SOYBN	1e-77	99.14	NA	NA	NA	AT5G11970.1 | Symbols: | Protein of unknown function (DUF3511) | chr5:3863289-3863606 REVERSE LENGTH=105	1e-31	99.14	GO:0008150	biological process	GO:0003674	molecular function	GO:0005886	plasma membrane	PF12023	Domain of unknown function (DUF3511)	NA	NA	NA	NA	NA	NA	NA	NA
Glyma06g05630	52	NA	NA	NA	NA	NA	NA	NA	NA	NA	NA	NA	NA	NA	NA	NA	NA	NA	NA	NA	NA	NA	NA	NA	NA	NA
Glyma06g05640	84	UniRef100_C6SXG6 Uncharacterized protein n=1 Tax=Glycine max RepID=C6SXG6_SOYBN	3e-55	98.81	UniRef100_I3XLL9 Protein phosphatase 2C n=1 Tax=Cucumis sativus RepID=I3XLL9_CUCSA	3e-28	91.67	AT4G33100.1 | Symbols: | CONTAINS InterPro DOMAIN/s: Mitochondrial distribution/morphology family 35/apoptosis (InterPro:IPR007918); Has 214 Blast hits to 214 proteins in 102 species: Archae - 0; Bacteria - 0; Metazoa - 110; Fungi - 69; Plants - 29; Viruses - 0; Other Eukaryotes - 6 (source: NCBI BLink). | chr4:15971701-15972342 FORWARD LENGTH=92	7e-33	97.62	GO:0008150	biological process	GO:0003674	molecular function	GO:0005634	nucleus	PF05254 PF02297	Uncharacterised protein family (UPF0203); Cytochrome oxidase c subunit VIb	PTHR21329 PTHR21329:SF9	N-ACETYLGLUCOSAMINYL TRANSFERASE COMPONENT GPI1-RELATED; OS09G0361700 PROTEIN	KOG3481	Uncharacterized_conserved_protein	NA	NA	NA	NA
Glyma06g05650	874	UniRef100_I1K8E3 Uncharacterized protein n=1 Tax=Glycine max RepID=I1K8E3_SOYBN	0	99.89	UniRef100_G7J8C0 Puromycin-sensitive aminopeptidase n=1 Tax=Medicago truncatula RepID=G7J8C0_MEDTR	0	99.89	AT4G33090.1 | Symbols: APM1, ATAPM1 | aminopeptidase M1 | chr4:15965915-15970418 REVERSE LENGTH=879	0	99.43	GO:0006094 GO:0006508 GO:0007010 GO:0009926 GO:0010359 GO:0010498	gluconeogenesis; proteolysis; cytoskeleton organization; auxin polar transport; regulation of anion channel activity; proteasomal protein catabolic process	GO:0004177 GO:0008237 GO:0008270	aminopeptidase activity; metallopeptidase activity; zinc ion binding	GO:0005634 GO:0005829 GO:0005886	nucleus; cytosol; plasma membrane	PF01433	Peptidase family M1	PTHR11533 PTHR11533:SF97	PROTEASE M1 ZINC METALLOPROTEASE;	KOG1046	Puromycin-sensitive_aminopeptidase_and_related_aminopeptidases	3.4.11.-	Aminopeptidases	K08776	puromycin-sensitive_aminopeptidase_[EC:3.4.11.-]
Glyma06g05660	215	UniRef100_UPI000233A42C UPI000233A42C related cluster n=1 Tax=unknown RepID=UPI000233A42C	1e-70	50.7	UniRef100_G7J8C0 Puromycin-sensitive aminopeptidase n=1 Tax=Medicago truncatula RepID=G7J8C0_MEDTR	4e-43	63.26	AT4G33090.1 | Symbols: APM1, ATAPM1 | aminopeptidase M1 | chr4:15965915-15970418 REVERSE LENGTH=879	8e-34	83.26	GO:0006094 GO:0006508 GO:0007010 GO:0009926 GO:0010359 GO:0010498	gluconeogenesis; proteolysis; cytoskeleton organization; auxin polar transport; regulation of anion channel activity; proteasomal protein catabolic process	GO:0004177 GO:0008237 GO:0008270	aminopeptidase activity; metallopeptidase activity; zinc ion binding	GO:0005634 GO:0005829 GO:0005886	nucleus; cytosol; plasma membrane	NA	NA	PTHR11533 PTHR11533:SF97	PROTEASE M1 ZINC METALLOPROTEASE;	NA	NA	NA	NA	NA	NA
Glyma06g05670	545	UniRef100_UPI000233A430 UPI000233A430 related cluster n=1 Tax=unknown RepID=UPI000233A430	0	99.82	UniRef100_G7J8B9 Abscisic insensitive 1B n=1 Tax=Medicago truncatula RepID=G7J8B9_MEDTR	0	99.82	AT1G72770.3 | Symbols: HAB1 | homology to ABI1 | chr1:27390998-27392851 FORWARD LENGTH=511	8e-168	99.82	GO:0006470 GO:0009610 GO:0010029	protein dephosphorylation; response to symbiotic fungus; regulation of seed germination	GO:0004722 GO:0005515	protein serine/threonine phosphatase activity; protein binding	GO:0008287	protein serine/threonine phosphatase complex	PF00481	Protein phosphatase 2C	PTHR13832 PTHR13832:SF115	PROTEIN PHOSPHATASE 2C; SUBFAMILY NOT NAMED	KOG0698	Serine/threonine_protein_phosphatase	3.1.3.16	Serine/threonine_specific_protein_phosphatase	K14497	protein_phosphatase_2C_[EC:3.1.3.16]
Glyma06g05680	504	UniRef100_I1K8E5 Uncharacterized protein n=1 Tax=Glycine max RepID=I1K8E5_SOYBN	0	99.8	UniRef100_G7J8B8 Serine/threonine protein kinase 38-like protein n=2 Tax=Medicago truncatula RepID=G7J8B8_MEDTR	0	99.8	AT4G33080.2 | Symbols: | AGC (cAMP-dependent, cGMP-dependent and protein kinase C) kinase family protein | chr4:15960146-15964296 FORWARD LENGTH=507	0	99.6	GO:0006468	protein phosphorylation	GO:0004672 GO:0004674 GO:0005524 GO:0016301 GO:0016772	protein kinase activity; protein serine/threonine kinase activity; ATP binding; kinase activity; transferase activity, transferring phosphorus-containing groups	GO:0005634	nucleus	PF00069 PF00433	Protein kinase domain; Protein kinase C terminal domain	PTHR24358 PTHR24358:SF32	SERINE/THREONINE-PROTEIN KINASE 38;	KOG0605	NDR_and_related_serine/threonine_kinases	NA	NA	NA	NA
Glyma06g05690	229	UniRef100_I1K8E6 Uncharacterized protein n=1 Tax=Glycine max RepID=I1K8E6_SOYBN	3e-164	99.56	UniRef100_G7J8B6 RNA-binding protein with multiple splicing n=1 Tax=Medicago truncatula RepID=G7J8B6_MEDTR	7e-93	94.76	AT1G76940.2 | Symbols: | RNA-binding (RRM/RBD/RNP motifs) family protein | chr1:28902707-28904085 REVERSE LENGTH=179	3e-27	42.36	GO:0008150	biological process	GO:0000166 GO:0003676	nucleotide binding; nucleic acid binding	GO:0005634	nucleus	PF00076	RNA recognition motif. (a.k.a. RRM, RBD, or RNP domain)	PTHR10501 PTHR10501:SF0	SMALL NUCLEAR RIBONUCLEOPROTEIN U1A,U2B; SMALL NUCLEAR RIBONUCLEOPROTEIN	NA	NA	NA	NA	NA	NA
Glyma06g05710	356	UniRef100_I1K8E7 Uncharacterized protein n=1 Tax=Glycine max RepID=I1K8E7_SOYBN	0	99.72	UniRef100_G7J8C3 Cyclopropane-fatty-acyl-phospholipid synthase n=1 Tax=Medicago truncatula RepID=G7J8C3_MEDTR	0	99.72	AT4G33110.2 | Symbols: | S-adenosyl-L-methionine-dependent methyltransferases superfamily protein | chr4:15972497-15974531 REVERSE LENGTH=355	5e-180	99.72	GO:0008610	lipid biosynthetic process	GO:0030794	(S)-coclaurine-N-methyltransferase activity	GO:0005737 GO:0005774 GO:0005886	cytoplasm; vacuolar membrane; plasma membrane	PF02353	Cyclopropane-fatty-acyl-phospholipid synthase	PTHR10108 PTHR10108:SF301	METHYLTRANSFERASE; SUBFAMILY NOT NAMED	NA	NA	NA	NA	NA	NA
Glyma06g05730	492	UniRef100_I1K8E9 Uncharacterized protein n=1 Tax=Glycine max RepID=I1K8E9_SOYBN	0	99.8	UniRef100_G7J8C5 NOL1/NOP2/Sun domain family member 5B n=1 Tax=Medicago truncatula RepID=G7J8C5_MEDTR	0	94.72	AT5G26180.2 | Symbols: | S-adenosyl-L-methionine-dependent methyltransferases superfamily protein | chr5:9149253-9152595 FORWARD LENGTH=567	0	95.12	GO:0008150	biological process	GO:0003674	molecular function	GO:0005737	cytoplasm	PF01189	NOL1/NOP2/sun family	PTHR22807 PTHR22807:SF4	NOP2(YEAST)-RELATED NOL1/NOP2/FMU(SUN) DOMAIN-CONTAINING; WILLIAMS-BEUREN SYNDROME CRITICAL REGION PROTEIN 20	KOG2360	Proliferation-associated_nucleolar_protein__(NOL1)	NA	NA	NA	NA
Glyma06g05740	159	UniRef100_I1K8F1 Uncharacterized protein n=1 Tax=Glycine max RepID=I1K8F1_SOYBN	1e-110	99.37	UniRef100_B9RQT7 Heat-shock protein, putative n=1 Tax=Ricinus communis RepID=B9RQT7_RICCO	1e-76	99.37	AT5G12020.1 | Symbols: HSP17.6II | 17.6 kDa class II heat shock protein | chr5:3882409-3882876 REVERSE LENGTH=155	4e-53	96.23	GO:0006457 GO:0009408 GO:0009644 GO:0034976 GO:0042542	protein folding; response to heat; response to high light intensity; response to endoplasmic reticulum stress; response to hydrogen peroxide	NA	NA	GO:0005737	cytoplasm	PF00011	Hsp20/alpha crystallin family	PTHR11527 PTHR11527:SF14	SMALL HEAT-SHOCK PROTEIN (HSP20) FAMILY; LETHAL(2) ESSENTIAL FOR LIFE - RELATED	KOG0710	Molecular_chaperone_(small_heat-shock_protein_Hsp26/Hsp42)	NA	NA	NA	NA
Glyma06g05750	357	UniRef100_I1K8F2 Uncharacterized protein n=1 Tax=Glycine max RepID=I1K8F2_SOYBN	0	99.72	UniRef100_G7J8D0 CCP-like protein n=1 Tax=Medicago truncatula RepID=G7J8D0_MEDTR	0	97.2	AT1G72820.1 | Symbols: | Mitochondrial substrate carrier family protein | chr1:27403457-27404506 FORWARD LENGTH=349	2e-160	98.32	GO:0006810 GO:0006839 GO:0055085	transport; mitochondrial transport; transmembrane transport	NA	NA	GO:0005739 GO:0005743	mitochondrion; mitochondrial inner membrane	PF00153	Mitochondrial carrier protein	PTHR24089 PTHR24089:SF94	FAMILY NOT NAMED; SUBFAMILY NOT NAMED	KOG0765	Predicted_mitochondrial_carrier_protein	NA	NA	NA	NA
Glyma06g05770	353	UniRef100_I1K8F4 Uncharacterized protein n=1 Tax=Glycine max RepID=I1K8F4_SOYBN	0	99.72	UniRef100_G7J8D4 Omega-amidase NIT2 n=1 Tax=Medicago truncatula RepID=G7J8D4_MEDTR	0	89.52	AT5G12040.1 | Symbols: | Nitrilase/cyanide hydratase and apolipoprotein N-acyltransferase family protein | chr5:3885162-3887772 FORWARD LENGTH=369	0	84.99	GO:0006807	nitrogen compound metabolic process	GO:0008270 GO:0016810	zinc ion binding; hydrolase activity, acting on carbon-nitrogen (but not peptide) bonds	GO:0005829 GO:0009507 GO:0009570	cytosol; chloroplast; chloroplast stroma	PF00795	Carbon-nitrogen hydrolase	PTHR23088	NITRILASE-RELATED	KOG0806	Carbon-nitrogen_hydrolase	3.5.1.3	Omega-amidase	K13566	omega-amidase_[EC:3.5.1.3]
Glyma06g05780	386	UniRef100_I1K8F5 Uncharacterized protein n=1 Tax=Glycine max RepID=I1K8F5_SOYBN	0	99.74	UniRef100_Q9LVK2 Gb|AAD25600.1 n=1 Tax=Arabidopsis thaliana RepID=Q9LVK2_ARATH	2e-41	62.69	AT3G13980.1 | Symbols: | unknown protein; BEST Arabidopsis thaliana protein match is: unknown protein (TAIR:AT1G54200.1); Has 1485 Blast hits to 418 proteins in 98 species: Archae - 0; Bacteria - 6; Metazoa - 246; Fungi - 61; Plants - 107; Viruses - 6; Other Eukaryotes - 1059 (source: NCBI BLink). | chr3:4619189-4620262 REVERSE LENGTH=357	5e-44	62.69	GO:0008150	biological process	GO:0003674	molecular function	GO:0005634	nucleus	NA	NA	NA	NA	NA	NA	NA	NA	NA	NA
Glyma06g05790	447	UniRef100_UPI0002339E94 UPI0002339E94 related cluster n=1 Tax=unknown RepID=UPI0002339E94	0	99.78	UniRef100_G7J8D7 Protein kinase C n=1 Tax=Medicago truncatula RepID=G7J8D7_MEDTR	0	99.11	AT4G38470.1 | Symbols: | ACT-like protein tyrosine kinase family protein | chr4:17999432-18003551 FORWARD LENGTH=575	9e-45	62.64	GO:0006468 GO:0007015 GO:0008152 GO:0009658	protein phosphorylation; actin filament organization; metabolic process; chloroplast organization	GO:0004672 GO:0004674 GO:0004712 GO:0004713 GO:0005524 GO:0016597 GO:0016772	protein kinase activity; protein serine/threonine kinase activity; protein serine/threonine/tyrosine kinase activity; protein tyrosine kinase activity; ATP binding; amino acid binding; transferase activity, transferring phosphorus-containing groups	GO:0005829 GO:0005886	cytosol; plasma membrane	PF00069	Protein kinase domain	PTHR23257	SERINE-THREONINE PROTEIN KINASE	KOG0192	Tyrosine_kinase_specific_for_activated_(GTP-bound)_p21cdc42Hs	NA	NA	NA	NA
Glyma06g05800	768	UniRef100_I1K8F7 Uncharacterized protein n=1 Tax=Glycine max RepID=I1K8F7_SOYBN	0	99.87	UniRef100_G7J8E6 Fgenesh protein n=1 Tax=Medicago truncatula RepID=G7J8E6_MEDTR	0	97.14	AT5G12080.3 | Symbols: MSL10, ATMSL10 | mechanosensitive channel of small conductance-like 10 | chr5:3898182-3900923 REVERSE LENGTH=734	0	96.09	GO:0006820 GO:0050982	anion transport; detection of mechanical stimulus	GO:0008381	mechanically-gated ion channel activity	GO:0005634 GO:0005886 GO:0016020	nucleus; plasma membrane; membrane	PF00924	Mechanosensitive ion channel	NA	NA	KOG4629	Predicted_mechanosensitive_ion_channel	NA	NA	NA	NA
Glyma06g05810	124	UniRef100_I1K8F8 Uncharacterized protein n=1 Tax=Glycine max RepID=I1K8F8_SOYBN	1e-79	99.19	UniRef100_G7J8E2 Ultraviolet-B-repressible protein n=1 Tax=Medicago truncatula RepID=G7J8E2_MEDTR	1e-46	98.39	AT2G06520.1 | Symbols: PSBX | photosystem II subunit X | chr2:2587868-2588218 REVERSE LENGTH=116	2e-26	99.19	GO:0015979	photosynthesis	GO:0003674	molecular function	GO:0009507 GO:0009523 GO:0009535 GO:0016020	chloroplast; photosystem II; chloroplast thylakoid membrane; membrane	PF06596	Photosystem II reaction centre X protein (PsbX)	NA	NA	NA	NA	NA	NA	NA	NA
Glyma06g05820	216	UniRef100_I1K8F9 Uncharacterized protein n=2 Tax=Glycine max RepID=I1K8F9_SOYBN	2e-152	99.54	UniRef100_G7J8E5 DnaJ domain family n=1 Tax=Medicago truncatula RepID=G7J8E5_MEDTR	3e-82	95.37	AT5G21430.1 | Symbols: | Chaperone DnaJ-domain superfamily protein | chr5:7222294-7223400 FORWARD LENGTH=218	1e-59	86.11	NA	NA	GO:0031072	heat shock protein binding	GO:0009507 GO:0009535	chloroplast; chloroplast thylakoid membrane	NA	NA	PTHR25040 PTHR25040:SF166	FAMILY NOT NAMED;	NA	NA	NA	NA	NA	NA
Glyma06g05830	288	UniRef100_I1K8G0 Uncharacterized protein n=1 Tax=Glycine max RepID=I1K8G0_SOYBN	2e-170	95.49	UniRef100_F8WLC1 GT-like trihelix DNA-binding protein n=1 Tax=Citrus unshiu RepID=F8WLC1_CITUN	8e-14	50.35	AT1G76880.1 | Symbols: | Duplicated homeodomain-like superfamily protein | chr1:28865594-28867931 FORWARD LENGTH=603	2e-11	26.04	GO:0006355	regulation of transcription, DNA-dependent	GO:0003677 GO:0003700	DNA binding; sequence-specific DNA binding transcription factor activity	GO:0005634	nucleus	NA	NA	NA	NA	NA	NA	NA	NA	NA	NA
Glyma06g05840	894	UniRef100_I1K8G1 Uncharacterized protein n=1 Tax=Glycine max RepID=I1K8G1_SOYBN	0	99.89	UniRef100_G7I915 F-box/LRR-repeat protein n=1 Tax=Medicago truncatula RepID=G7I915_MEDTR	0	99.33	AT4G33210.1 | Symbols: SLOMO | F-box family protein | chr4:16015971-16020697 REVERSE LENGTH=990	0	97.54	GO:0000956 GO:0006511 GO:0010252 GO:0048645	nuclear-transcribed mRNA catabolic process; ubiquitin-dependent protein catabolic process; auxin homeostasis; organ formation	GO:0004842	ubiquitin-protein ligase activity	GO:0005737	cytoplasm	PF00646	F-box domain	PTHR23125 PTHR23125:SF57	F-BOX/LEUCINE RICH REPEAT PROTEIN; gb def: Hypothetical protein F4I10.140 (Hypothetical protein AT4g33210)	KOG4341	F-box_protein_containing_LRR	NA	NA	NA	NA
Glyma06g05850	230	UniRef100_I1K8G2 Uncharacterized protein n=1 Tax=Glycine max RepID=I1K8G2_SOYBN	1e-163	99.57	UniRef100_Q10R05 Expressed protein n=1 Tax=Oryza sativa Japonica Group RepID=Q10R05_ORYSJ	1e-49	87.39	AT2G26340.1 | Symbols: | unknown protein; FUNCTIONS IN: molecular_function unknown; INVOLVED IN: biological_process unknown; LOCATED IN: chloroplast thylakoid membrane, chloroplast thylakoid lumen, chloroplast; EXPRESSED IN: 22 plant structures; EXPRESSED DURING: 13 growth stages; Has 38 Blast hits to 38 proteins in 13 species: Archae - 0; Bacteria - 0; Metazoa - 0; Fungi - 0; Plants - 38; Viruse…	6e-72	89.13	GO:0008150	biological process	GO:0003674	molecular function	GO:0005634 GO:0009507 GO:0009535 GO:0009543	nucleus; chloroplast; chloroplast thylakoid membrane; chloroplast thylakoid lumen	NA	NA	NA	NA	NA	NA	NA	NA	NA	NA
Glyma06g05860	228	UniRef100_I1K8G3 Uncharacterized protein n=2 Tax=Glycine max RepID=I1K8G3_SOYBN	1e-167	99.56	UniRef100_F8WLD0 Ferredoxin-like protein n=1 Tax=Citrus unshiu RepID=F8WLD0_CITUN	5e-97	88.16	AT1G02180.1 | Symbols: | ferredoxin-related | chr1:413619-414505 REVERSE LENGTH=226	1e-42	75.44	GO:0008150	biological process	GO:0003674	molecular function	NA	NA	NA	NA	NA	NA	NA	NA	NA	NA	NA	NA
Glyma06g05870	112	UniRef100_I1K8G5 Uncharacterized protein (Fragment) n=1 Tax=Glycine max RepID=I1K8G5_SOYBN	9e-66	92.86	UniRef100_Q10R03 Expressed protein n=1 Tax=Oryza sativa Japonica Group RepID=Q10R03_ORYSJ	4e-09	90.18	NA	NA	NA	NA	NA	NA	NA	NA	NA	NA	NA	NA	NA	NA	NA	NA	NA	NA	NA
Glyma06g05880	235	UniRef100_C6TD63 Uncharacterized protein n=1 Tax=Glycine max RepID=C6TD63_SOYBN	3e-167	99.57	UniRef100_F8WLD3 YGGT family protein n=1 Tax=Citrus unshiu RepID=F8WLD3_CITUN	5e-84	97.02	AT5G21920.1 | Symbols: YLMG2, ATYLMG2 | YGGT family protein | chr5:7241350-7242765 REVERSE LENGTH=251	2e-70	81.7	GO:0008150	biological process	GO:0003674	molecular function	GO:0005886 GO:0016020	plasma membrane; membrane	PF02325	YGGT family	NA	NA	NA	NA	NA	NA	K02221	YggT_family_protein
Glyma06g05890	904	UniRef100_I1K8G7 Uncharacterized protein n=1 Tax=Glycine max RepID=I1K8G7_SOYBN	0	99.89	UniRef100_A7ISW5 Copper P1B-ATPase n=1 Tax=Glycine max RepID=A7ISW5_SOYBN	0	99.89	AT5G21930.2 | Symbols: PAA2, HMA8 | P-type ATPase of Arabidopsis 2 | chr5:7243129-7248721 FORWARD LENGTH=883	0	97.68	GO:0006754 GO:0006812 GO:0006825 GO:0008152 GO:0009767 GO:0030001 GO:0046034	ATP biosynthetic process; cation transport; copper ion transport; metabolic process; photosynthetic electron transport chain; metal ion transport; ATP metabolic process	GO:0000166 GO:0003824 GO:0005375 GO:0005524 GO:0015662 GO:0016820 GO:0043682 GO:0046872	nucleotide binding; catalytic activity; copper ion transmembrane transporter activity; ATP binding; ATPase activity, coupled to transmembrane movement of ions, phosphorylative mechanism; hydrolase activity, acting on acid anhydrides, catalyzing transmembrane movement of substances; copper-transporting ATPase activity; metal ion binding	GO:0005886 GO:0009535 GO:0016020 GO:0016021	plasma membrane; chloroplast thylakoid membrane; membrane; integral to membrane	PF00403 PF00702 PF00122	Heavy-metal-associated domain; haloacid dehalogenase-like hydrolase; E1-E2 ATPase	PTHR24093 PTHR24093:SF26	FAMILY NOT NAMED; SUBFAMILY NOT NAMED	KOG0207	Cation_transport_ATPase	NA	NA	NA	NA
Glyma06g05900	985	UniRef100_I1K8G8 Uncharacterized protein n=1 Tax=Glycine max RepID=I1K8G8_SOYBN	0	99.9	UniRef100_B9RQX5 Erecta, putative n=1 Tax=Ricinus communis RepID=B9RQX5_RICCO	0	99.9	AT2G26330.1 | Symbols: ER, QRP1 | Leucine-rich receptor-like protein kinase family protein | chr2:11208367-11213895 REVERSE LENGTH=976	0	99.9	GO:0001558 GO:0006468 GO:0008356 GO:0009664 GO:0009944 GO:0009965 GO:0010075 GO:0010103 GO:0010148 GO:0030155 GO:0031540 GO:0042742 GO:0048281 GO:0050832 GO:0051302 GO:2000027	regulation of cell growth; protein phosphorylation; asymmetric cell division; plant-type cell wall organization; polarity specification of adaxial/abaxial axis; leaf morphogenesis; regulation of meristem growth; stomatal complex morphogenesis; transpiration; regulation of cell adhesion; regulation of anthocyanin biosynthetic process; defense response to bacterium; inflorescence morphogenesis; def…	GO:0004672 GO:0004674 GO:0005524 GO:0016772 GO:0019199	protein kinase activity; protein serine/threonine kinase activity; ATP binding; transferase activity, transferring phosphorus-containing groups; transmembrane receptor protein kinase activity	GO:0005576 GO:0005739	extracellular region; mitochondrion	PF00560 PF08263 PF00069	Leucine Rich Repeat; Leucine rich repeat N-terminal domain; Protein kinase domain	PTHR24420 PTHR24420:SF825	FAMILY NOT NAMED;	KOG1187	Serine/threonine_protein_kinase	NA	NA	NA	NA
Glyma06g05910	1522	UniRef100_UPI000233A5B8 UPI000233A5B8 related cluster n=1 Tax=unknown RepID=UPI000233A5B8	0	99.93	UniRef100_G7J8G4 Myosin-like protein n=1 Tax=Medicago truncatula RepID=G7J8G4_MEDTR	0	99.47	AT4G33200.1 | Symbols: XI-I, ATXI-I, XI-15 | myosin, putative | chr4:16002768-16014792 REVERSE LENGTH=1522	0	99.34	GO:0006606 GO:0030048 GO:0051645 GO:0051646 GO:0060151	protein import into nucleus; actin filament-based movement; Golgi localization; mitochondrion localization; peroxisome localization	GO:0000166 GO:0003774 GO:0005524 GO:0017111	nucleotide binding; motor activity; ATP binding; nucleoside-triphosphatase activity	GO:0005634 GO:0016459	nucleus; myosin complex	PF00612 PF00063 PF01843 PF02736	IQ calmodulin-binding motif; Myosin head (motor domain); DIL domain; Myosin N-terminal SH3-like domain	PTHR13140 PTHR13140:SF36	MYOSIN; MYOSIN I, HIGH MOLECULAR WEIGHT FORM	KOG0160	Myosin_class_V_heavy_chain	NA	NA	NA	NA
Glyma06g05950	484	UniRef100_I1K8H4 Uncharacterized protein (Fragment) n=2 Tax=Glycine max RepID=I1K8H4_SOYBN	0	94.42	UniRef100_G7J933 Endoglucanase n=1 Tax=Medicago truncatula RepID=G7J933_MEDTR	0	96.9	AT3G43860.1 | Symbols: AtGH9A4, GH9A4 | glycosyl hydrolase 9A4 | chr3:15707183-15709438 FORWARD LENGTH=486	0	95.25	GO:0005975	carbohydrate metabolic process	GO:0003824 GO:0004553	catalytic activity; hydrolase activity, hydrolyzing O-glycosyl compounds	GO:0005576	extracellular region	PF00759	Glycosyl hydrolase family 9	PTHR22298 PTHR22298:SF3	ENDO-1,4-BETA-GLUCANASE; ENDO-1,4-BETA-GLUCANASE	NA	NA	3.2.1.4	Cellulase	K01179	endoglucanase_[EC:3.2.1.4]
Glyma06g05960	456	UniRef100_UPI000233A5B9 UPI000233A5B9 related cluster n=1 Tax=unknown RepID=UPI000233A5B9	0	99.78	UniRef100_Q0KKS2 G protein alpha subunit n=1 Tax=Phaseolus lunatus RepID=Q0KKS2_PHALU	0	84.21	AT2G26300.1 | Symbols: GPA1, GP ALPHA 1, ATGPA1 | G protein alpha subunit 1 | chr2:11198087-11200822 FORWARD LENGTH=383	0	84.21	GO:0000303 GO:0001789 GO:0006396 GO:0006471 GO:0006499 GO:0006571 GO:0006944 GO:0007165 GO:0007186 GO:0007188 GO:0008219 GO:0009094 GO:0009738 GO:0009740 GO:0009744 GO:0009749 GO:0009750 GO:0009755 GO:0009785 GO:0009788 GO:0009789 GO:0009845 GO:0009863 GO:0009873 GO:0010027 GO:0010119 GO:0010244 GO:0022402 GO:0042127 GO:0071215 GO:0072593	response to superoxide; G-protein coupled receptor signaling pathway, coupled to S1P second messenger; RNA processing; protein ADP-ribosylation; N-terminal protein myristoylation; tyrosine biosynthetic process; cellular membrane fusion; signal transduction; G-protein coupled receptor signaling pathway; adenylate cyclase-modulating G-protein coupled receptor signaling pathway; cell death; L-phenyl…	GO:0001664 GO:0003924 GO:0004871 GO:0005095 GO:0005515 GO:0005525 GO:0016247 GO:0019001 GO:0031683 GO:0051020	G-protein coupled receptor binding; GTPase activity; signal transducer activity; GTPase inhibitor activity; protein binding; GTP binding; channel regulator activity; guanyl nucleotide binding; G-protein beta/gamma-subunit complex binding; GTPase binding	GO:0005737 GO:0005789 GO:0005834 GO:0005886 GO:0009506 GO:0031234	cytoplasm; endoplasmic reticulum membrane; heterotrimeric G-protein complex; plasma membrane; plasmodesma; extrinsic to internal side of plasma membrane	PF00503	G-protein alpha subunit	PTHR10218 PTHR10218:SF25	GTP-BINDING PROTEIN ALPHA SUBUNIT; gb def: guanine nucleotide-binding protein, alpha subunit [caenorhabditis elegans]	KOG0082	G-protein_alpha_subunit_(small_G_protein_superfamily)	NA	NA	K04640	guanine_nucleotide_binding_protein_(G_protein),_alpha,_other
Glyma06g05970	306	UniRef100_UPI0002339E97 UPI0002339E97 related cluster n=1 Tax=unknown RepID=UPI0002339E97	0	99.67	UniRef100_G7J939 Epoxide hydrolase n=1 Tax=Medicago truncatula RepID=G7J939_MEDTR	3e-152	99.67	AT5G21950.1 | Symbols: | alpha/beta-Hydrolases superfamily protein | chr5:7254067-7255866 REVERSE LENGTH=308	5e-109	98.37	GO:0008150	biological process	GO:0016787	hydrolase activity	GO:0009507	chloroplast	PF00561	alpha/beta hydrolase fold	PTHR10992 PTHR10992:SF163	ALPHA/BETA HYDROLASE RELATED; HYDROLASE, ALPHA/BETA FOLD FAMILY PROTEIN	KOG1454	Predicted_hydrolase/acyltransferase_(alpha/beta_hydrolase_superfamily)	NA	NA	NA	NA
Glyma06g05980	303	UniRef100_I1K8H7 Uncharacterized protein n=1 Tax=Glycine max RepID=I1K8H7_SOYBN	0	99.67	UniRef100_G7J939 Epoxide hydrolase n=1 Tax=Medicago truncatula RepID=G7J939_MEDTR	5e-157	99.67	AT5G21950.1 | Symbols: | alpha/beta-Hydrolases superfamily protein | chr5:7254067-7255866 REVERSE LENGTH=308	2e-113	98.35	GO:0008150	biological process	GO:0016787	hydrolase activity	GO:0009507	chloroplast	PF00561	alpha/beta hydrolase fold	PTHR10992 PTHR10992:SF163	ALPHA/BETA HYDROLASE RELATED; HYDROLASE, ALPHA/BETA FOLD FAMILY PROTEIN	KOG1454	Predicted_hydrolase/acyltransferase_(alpha/beta_hydrolase_superfamily)	NA	NA	NA	NA
Glyma06g05990	375	UniRef100_I1JU25 Uncharacterized protein n=2 Tax=Glycine max RepID=I1JU25_SOYBN	0	99.73	UniRef100_G7J941 Kinase-like protein n=1 Tax=Medicago truncatula RepID=G7J941_MEDTR	0	99.47	AT2G05940.1 | Symbols: | Protein kinase superfamily protein | chr2:2287514-2289270 REVERSE LENGTH=462	0	98.4	GO:0000165 GO:0006468 GO:0006499 GO:0006612 GO:0007154 GO:0009409 GO:0009414 GO:0009611 GO:0009625 GO:0009627 GO:0009697 GO:0009738 GO:0009862 GO:0009863 GO:0009867 GO:0009963 GO:0010363 GO:0016036 GO:0019375 GO:0030968 GO:0031348 GO:0042538 GO:0042631 GO:0042742 GO:0043069 GO:0045087 GO:0050832	MAPK cascade; protein phosphorylation; N-terminal protein myristoylation; protein targeting to membrane; cell communication; response to cold; response to water deprivation; response to wounding; response to insect; systemic acquired resistance; salicylic acid biosynthetic process; abscisic acid mediated signaling pathway; systemic acquired resistance, salicylic acid mediated signaling pathway; s…	GO:0004672 GO:0004674 GO:0005524 GO:0016301 GO:0016772	protein kinase activity; protein serine/threonine kinase activity; ATP binding; kinase activity; transferase activity, transferring phosphorus-containing groups	GO:0005886	plasma membrane	PF07714	Protein tyrosine kinase	PTHR24420 PTHR24420:SF685	FAMILY NOT NAMED;	KOG1187	Serine/threonine_protein_kinase	NA	NA	NA	NA
Glyma06g06000	144	UniRef100_I1K8H9 Uncharacterized protein n=1 Tax=Glycine max RepID=I1K8H9_SOYBN	1e-98	99.31	UniRef100_G7J942 Copper transporter n=1 Tax=Medicago truncatula RepID=G7J942_MEDTR	3e-78	99.31	AT5G20650.1 | Symbols: COPT5 | copper transporter 5 | chr5:6985481-6985921 REVERSE LENGTH=146	2e-45	99.31	GO:0006825 GO:0009737 GO:0015680 GO:0035434	copper ion transport; response to abscisic acid stimulus; intracellular copper ion transport; copper ion transmembrane transport	GO:0005375 GO:0015089	copper ion transmembrane transporter activity; high affinity copper ion transmembrane transporter activity	GO:0005770 GO:0005773 GO:0005774 GO:0005794 GO:0009506 GO:0016021	late endosome; vacuole; vacuolar membrane; Golgi apparatus; plasmodesma; integral to membrane	PF04145	Ctr copper transporter family	PTHR12483 PTHR12483:SF1	SOLUTE CARRIER FAMILY 31 (COPPER TRANSPORTERS); gb def: f31e8.4.p [caenorhabditis elegans]	KOG3386	Copper_transporter	NA	NA	NA	NA
Glyma06g06020	70	NA	NA	NA	NA	NA	NA	NA	NA	NA	NA	NA	NA	NA	NA	NA	NA	NA	NA	NA	NA	NA	NA	NA	NA	NA
Glyma06g06030	580	UniRef100_I1K8I2 Uncharacterized protein n=1 Tax=Glycine max RepID=I1K8I2_SOYBN	0	99.83	UniRef100_B9RQZ0 Pentatricopeptide repeat-containing protein, putative n=1 Tax=Ricinus communis RepID=B9RQZ0_RICCO	0	99.14	AT2G26280.1 | Symbols: CID7 | CTC-interacting domain 7 | chr2:11188143-11190579 REVERSE LENGTH=567	0	99.83	GO:0006298	mismatch repair	GO:0003684 GO:0005515 GO:0005524	damaged DNA binding; protein binding; ATP binding	GO:0009507	chloroplast	PF08590 PF01713	Domain of unknown function (DUF1771); Smr domain	NA	NA	NA	NA	NA	NA	NA	NA
Glyma06g06040	66	NA	NA	NA	NA	NA	NA	NA	NA	NA	NA	NA	NA	NA	NA	NA	NA	NA	NA	NA	NA	NA	NA	NA	NA	NA
Glyma06g06050	982	UniRef100_UPI0002339E9A UPI0002339E9A related cluster n=1 Tax=unknown RepID=UPI0002339E9A	0	99.9	UniRef100_G7J944 Pentatricopeptide repeat-containing protein n=1 Tax=Medicago truncatula RepID=G7J944_MEDTR	0	98.37	AT4G33170.1 | Symbols: | Tetratricopeptide repeat (TPR)-like superfamily protein | chr4:15995701-15998673 REVERSE LENGTH=990	0	97.25	NA	NA	NA	NA	GO:0005739	mitochondrion	PF01535	PPR repeat	PTHR24015 PTHR24015:SF65	FAMILY NOT NAMED; SUBFAMILY NOT NAMED	NA	NA	NA	NA	NA	NA
Glyma06g06070	540	UniRef100_I1K8I4 Uncharacterized protein n=1 Tax=Glycine max RepID=I1K8I4_SOYBN	0	99.81	UniRef100_G7J947 DNA topoisomerase 2-binding protein n=1 Tax=Medicago truncatula RepID=G7J947_MEDTR	0	97.22	AT3G43930.1 | Symbols: | BRCT domain-containing DNA repair protein | chr3:15760948-15763263 REVERSE LENGTH=502	4e-166	99.81	GO:0008150	biological process	GO:0003674	molecular function	GO:0005622 GO:0005634	intracellular; nucleus	PF00533	BRCA1 C Terminus (BRCT) domain	PTHR13561 PTHR13561:SF20	DNA REPLICATION REGULATOR DPB11-RELATED;	NA	NA	NA	NA	NA	NA
Glyma06g06080	402	UniRef100_I1K8I6 Uncharacterized protein (Fragment) n=2 Tax=Glycine max RepID=I1K8I6_SOYBN	0	95.52	UniRef100_G7J951 3beta-hydroxysteroid-dehydrogenase/decarboxylase isoform n=1 Tax=Medicago truncatula RepID=G7J951_MEDTR	0	97.51	AT2G26260.1 | Symbols: AT3BETAHSD/D2, 3BETAHSD/D2 | 3beta-hydroxysteroid-dehydrogenase/decarboxylase isoform 2 | chr2:11178237-11182872 FORWARD LENGTH=564	0	97.01	GO:0006694 GO:0016126 GO:0019745 GO:0055114	steroid biosynthetic process; sterol biosynthetic process; pentacyclic triterpenoid biosynthetic process; oxidation-reduction process	GO:0000166 GO:0003854 GO:0016616 GO:0047012	nucleotide binding; 3-beta-hydroxy-delta5-steroid dehydrogenase activity; oxidoreductase activity, acting on the CH-OH group of donors, NAD or NADP as acceptor; sterol-4-alpha-carboxylate 3-dehydrogenase (decarboxylating) activity	GO:0005783 GO:0016020	endoplasmic reticulum; membrane	PF01073	3-beta hydroxysteroid dehydrogenase/isomerase family	PTHR10366 PTHR10366:SF20	NAD DEPENDENT EPIMERASE/DEHYDRATASE; NODULATION PROTEIN NOLK-RELATED	KOG1430	C-3_sterol_dehydrogenase/3-beta-hydroxysteroid_dehydrogenase_and_related_dehydrogenases	NA	NA	NA	NA
Glyma06g06090	683	UniRef100_UPI0002339E9E UPI0002339E9E related cluster n=1 Tax=unknown RepID=UPI0002339E9E	0	99.27	UniRef100_G7J953 DNA cross-link repair 1A protein n=1 Tax=Medicago truncatula RepID=G7J953_MEDTR	0	98.54	AT2G45700.1 | Symbols: | sterile alpha motif (SAM) domain-containing protein | chr2:18827216-18830505 REVERSE LENGTH=723	0	91.36	GO:0007062 GO:0009630 GO:0031048 GO:0045132	sister chromatid cohesion; gravitropism; chromatin silencing by small RNA; meiotic chromosome segregation	GO:0016787	hydrolase activity	GO:0005634	nucleus	PF07522 PF00536	DNA repair metallo-beta-lactamase; SAM domain (Sterile alpha motif)	PTHR23240 PTHR23240:SF1	DNA CROSS-LINK REPAIR PROTEIN PSO2/SNM1-RELATED; DNA CROSS-LINK REPAIR PROTEIN PSO2/SNM1	KOG1361	Predicted_hydrolase_involved_in_interstrand_cross-link_repair	NA	NA	NA	NA
Glyma06g06110	536	UniRef100_I1K8I9 3-ketoacyl-CoA synthase n=1 Tax=Glycine max RepID=I1K8I9_SOYBN	0	99.81	UniRef100_I1K8I9 3-ketoacyl-CoA synthase n=1 Tax=Glycine max RepID=I1K8I9_SOYBN	0	99.81	AT2G26250.1 | Symbols: FDH, KCS10 | 3-ketoacyl-CoA synthase 10 | chr2:11170799-11173059 REVERSE LENGTH=550	0	99.25	GO:0000038 GO:0006633 GO:0008152 GO:0008610 GO:0009409 GO:0009416 GO:0009913 GO:0042335 GO:0080167	very long-chain fatty acid metabolic process; fatty acid biosynthetic process; metabolic process; lipid biosynthetic process; response to cold; response to light stimulus; epidermal cell differentiation; cuticle development; response to karrikin	GO:0003824 GO:0016746 GO:0016747	catalytic activity; transferase activity, transferring acyl groups; transferase activity, transferring acyl groups other than amino-acyl groups	GO:0005634 GO:0005783 GO:0016020	nucleus; endoplasmic reticulum; membrane	PF08392 PF08541	FAE1/Type III polyketide synthase-like protein; 3-Oxoacyl-[acyl-carrier-protein (ACP)] synthase III C terminal	NA	NA	NA	NA	NA	NA	NA	NA
Glyma06g06130	389	UniRef100_I1K8J0 Uncharacterized protein n=1 Tax=Glycine max RepID=I1K8J0_SOYBN	0	99.74	NA	NA	NA	AT5G21280.1 | Symbols: | hydroxyproline-rich glycoprotein family protein | chr5:7264094-7265514 REVERSE LENGTH=302	2e-19	28.79	NA	NA	NA	NA	GO:0005634	nucleus	NA	NA	NA	NA	NA	NA	NA	NA	NA	NA
Glyma06g06160	448	UniRef100_I1JU39 Uncharacterized protein n=1 Tax=Glycine max RepID=I1JU39_SOYBN	0	92.19	UniRef100_B9HCN7 F-box family protein n=1 Tax=Populus trichocarpa RepID=B9HCN7_POPTR	0	92.19	AT4G33160.1 | Symbols: | F-box family protein | chr4:15994160-15995533 FORWARD LENGTH=457	1e-140	89.51	GO:0006511	ubiquitin-dependent protein catabolic process	GO:0004842	ubiquitin-protein ligase activity	GO:0005634	nucleus	PF00646	F-box domain	NA	NA	NA	NA	NA	NA	NA	NA
Glyma06g06170	735	UniRef100_UPI0002339EA0 UPI0002339EA0 related cluster n=1 Tax=unknown RepID=UPI0002339EA0	0	99.86	UniRef100_B9RNQ1 Cysteine-type endopeptidase, putative n=1 Tax=Ricinus communis RepID=B9RNQ1_RICCO	0	65.31	AT2G24640.1 | Symbols: UBP19 | ubiquitin-specific protease 19 | chr2:10475613-10479341 REVERSE LENGTH=672	0	76.19	GO:0006511	ubiquitin-dependent protein catabolic process	GO:0004197 GO:0004221 GO:0008270	cysteine-type endopeptidase activity; ubiquitin thiolesterase activity; zinc ion binding	GO:0005634	nucleus	PF00443 PF01753	Ubiquitin carboxyl-terminal hydrolase; MYND finger	PTHR24006 PTHR24006:SF250	FAMILY NOT NAMED;	KOG1865	Ubiquitin_carboxyl-terminal_hydrolase	NA	NA	NA	NA
Glyma06g06180	829	UniRef100_I1K8J3 Uncharacterized protein n=1 Tax=Glycine max RepID=I1K8J3_SOYBN	0	99.88	UniRef100_G7I7J7 Histidine kinase cytokinin receptor n=1 Tax=Medicago truncatula RepID=G7I7J7_MEDTR	0	99.4	AT5G10720.1 | Symbols: AHK5, CKI2, HK5 | histidine kinase 5 | chr5:3386835-3390541 FORWARD LENGTH=922	0	99.28	GO:0000160 GO:0006355 GO:0007165 GO:0009736 GO:0009788 GO:0010048 GO:0010105 GO:0016310 GO:0018106 GO:0043481 GO:0048364 GO:0048440 GO:0070301 GO:0071219 GO:0071732 GO:0090333	phosphorelay signal transduction system; regulation of transcription, DNA-dependent; signal transduction; cytokinin mediated signaling pathway; negative regulation of abscisic acid mediated signaling pathway; vernalization response; negative regulation of ethylene mediated signaling pathway; phosphorylation; peptidyl-histidine phosphorylation; anthocyanin accumulation in tissues in response to UV…	GO:0000155 GO:0000156 GO:0004673 GO:0004871 GO:0005524 GO:0016772	phosphorelay sensor kinase activity; phosphorelay response regulator activity; protein histidine kinase activity; signal transducer activity; ATP binding; transferase activity, transferring phosphorus-containing groups	GO:0005737 GO:0005773 GO:0005886 GO:0016020	cytoplasm; vacuole; plasma membrane; membrane	PF02518 PF00512 PF00072	Histidine kinase-, DNA gyrase B-, and HSP90-like ATPase; His Kinase A (phosphoacceptor) domain; Response regulator receiver domain	PTHR24423 PTHR24423:SF141	TWO COMPONENT SIGNAL TRANSDUCTION PROTEIN-RELATED;	KOG0519	Sensory_transduction_histidine_kinase	NA	NA	NA	NA
Glyma06g06190	318	UniRef100_I1K8J4 Uncharacterized protein (Fragment) n=1 Tax=Glycine max RepID=I1K8J4_SOYBN	3e-172	94.97	UniRef100_G7J969 Ankyrin repeat domain-containing protein n=1 Tax=Medicago truncatula RepID=G7J969_MEDTR	2e-120	98.11	AT4G10720.1 | Symbols: | Ankyrin repeat family protein | chr4:6607879-6609358 FORWARD LENGTH=445	7e-45	87.42	GO:0008150	biological process	NA	NA	GO:0005575	cellular component	NA	NA	NA	NA	NA	NA	NA	NA	NA	NA
Glyma06g06200	264	UniRef100_I1K8J5 Uncharacterized protein n=1 Tax=Glycine max RepID=I1K8J5_SOYBN	0	99.62	UniRef100_G7J970 NAD dependent epimerase/dehydratase family protein n=1 Tax=Medicago truncatula RepID=G7J970_MEDTR	5e-91	90.91	AT5G10730.1 | Symbols: | NAD(P)-binding Rossmann-fold superfamily protein | chr5:3390822-3392947 REVERSE LENGTH=287	2e-88	98.11	GO:0044237	cellular metabolic process	GO:0000166 GO:0003824 GO:0050662	nucleotide binding; catalytic activity; coenzyme binding	GO:0005739 GO:0005886	mitochondrion; plasma membrane	NA	NA	PTHR12126 PTHR12126:SF2	NADH-UBIQUINONE OXIDOREDUCTASE 39 KDA SUBUNIT-RELATED; UNCHARACTERIZED	KOG4288	Predicted_oxidoreductase	NA	NA	NA	NA
Glyma06g06220	429	UniRef100_I1JU42 Uncharacterized protein n=1 Tax=Glycine max RepID=I1JU42_SOYBN	0	99.77	UniRef100_G7J969 Ankyrin repeat domain-containing protein n=1 Tax=Medicago truncatula RepID=G7J969_MEDTR	0	99.77	AT4G10720.1 | Symbols: | Ankyrin repeat family protein | chr4:6607879-6609358 FORWARD LENGTH=445	1e-95	91.84	GO:0008150	biological process	NA	NA	GO:0005575	cellular component	NA	NA	PTHR24198 PTHR24198:SF302	ANKYRIN REPEAT AND PROTEIN KINASE DOMAIN-CONTAININ;	KOG4412	26S_proteasome_regulatory_complex,_subunit_PSMD10	NA	NA	NA	NA
Glyma06g06240	920	UniRef100_I1K8K2 Uncharacterized protein n=1 Tax=Glycine max RepID=I1K8K2_SOYBN	0	99.46	UniRef100_G7I7J7 Histidine kinase cytokinin receptor n=1 Tax=Medicago truncatula RepID=G7I7J7_MEDTR	0	85.11	AT5G10720.1 | Symbols: AHK5, CKI2, HK5 | histidine kinase 5 | chr5:3386835-3390541 FORWARD LENGTH=922	0	85.11	GO:0000160 GO:0006355 GO:0007165 GO:0009736 GO:0009788 GO:0010048 GO:0010105 GO:0016310 GO:0018106 GO:0043481 GO:0048364 GO:0048440 GO:0070301 GO:0071219 GO:0071732 GO:0090333	phosphorelay signal transduction system; regulation of transcription, DNA-dependent; signal transduction; cytokinin mediated signaling pathway; negative regulation of abscisic acid mediated signaling pathway; vernalization response; negative regulation of ethylene mediated signaling pathway; phosphorylation; peptidyl-histidine phosphorylation; anthocyanin accumulation in tissues in response to UV…	GO:0000155 GO:0000156 GO:0004673 GO:0004871 GO:0005524 GO:0016772	phosphorelay sensor kinase activity; phosphorelay response regulator activity; protein histidine kinase activity; signal transducer activity; ATP binding; transferase activity, transferring phosphorus-containing groups	GO:0005737 GO:0005773 GO:0005886 GO:0016020	cytoplasm; vacuole; plasma membrane; membrane	PF00512 PF00072 PF02518	His Kinase A (phosphoacceptor) domain; Response regulator receiver domain; Histidine kinase-, DNA gyrase B-, and HSP90-like ATPase	PTHR24423 PTHR24423:SF141	TWO COMPONENT SIGNAL TRANSDUCTION PROTEIN-RELATED;	KOG0519	Sensory_transduction_histidine_kinase	NA	NA	NA	NA
Glyma06g06250	278	UniRef100_UPI0002339EA1 UPI0002339EA1 related cluster n=1 Tax=unknown RepID=UPI0002339EA1	0	99.64	UniRef100_D7M301 Catalytic/ coenzyme binding protein n=1 Tax=Arabidopsis lyrata subsp. lyrata RepID=D7M301_ARALL	2e-123	99.28	AT5G10730.1 | Symbols: | NAD(P)-binding Rossmann-fold superfamily protein | chr5:3390822-3392947 REVERSE LENGTH=287	4e-123	99.28	GO:0044237	cellular metabolic process	GO:0000166 GO:0003824 GO:0050662	nucleotide binding; catalytic activity; coenzyme binding	GO:0005739 GO:0005886	mitochondrion; plasma membrane	NA	NA	PTHR12126 PTHR12126:SF2	NADH-UBIQUINONE OXIDOREDUCTASE 39 KDA SUBUNIT-RELATED; UNCHARACTERIZED	KOG4288	Predicted_oxidoreductase	NA	NA	NA	NA
Glyma06g06270	210	UniRef100_I1K8K4 Uncharacterized protein n=1 Tax=Glycine max RepID=I1K8K4_SOYBN	1e-142	93.33	UniRef100_G7J969 Ankyrin repeat domain-containing protein n=1 Tax=Medicago truncatula RepID=G7J969_MEDTR	6e-102	99.52	AT4G10720.2 | Symbols: | Ankyrin repeat family protein | chr4:6607879-6609358 FORWARD LENGTH=412	3e-60	96.67	GO:0008150	biological process	NA	NA	GO:0005575	cellular component	NA	NA	NA	NA	KOG4412	26S_proteasome_regulatory_complex,_subunit_PSMD10	NA	NA	NA	NA
Glyma06g06280	267	UniRef100_I1K8K5 Uncharacterized protein (Fragment) n=2 Tax=Glycine max RepID=I1K8K5_SOYBN	3e-154	80.9	UniRef100_G7J970 NAD dependent epimerase/dehydratase family protein n=1 Tax=Medicago truncatula RepID=G7J970_MEDTR	3e-97	79.78	AT5G10730.1 | Symbols: | NAD(P)-binding Rossmann-fold superfamily protein | chr5:3390822-3392947 REVERSE LENGTH=287	2e-93	98.13	GO:0044237	cellular metabolic process	GO:0000166 GO:0003824 GO:0050662	nucleotide binding; catalytic activity; coenzyme binding	GO:0005739 GO:0005886	mitochondrion; plasma membrane	PF01370	NAD dependent epimerase/dehydratase family	PTHR12126 PTHR12126:SF2	NADH-UBIQUINONE OXIDOREDUCTASE 39 KDA SUBUNIT-RELATED; UNCHARACTERIZED	KOG4288	Predicted_oxidoreductase	NA	NA	NA	NA
Glyma06g06290	166	UniRef100_C6T255 Uncharacterized protein n=1 Tax=Glycine max RepID=C6T255_SOYBN	3e-117	99.4	UniRef100_Q9FHH5 Protein GLUTAMINE DUMPER 3 n=1 Tax=Arabidopsis thaliana RepID=GDU3_ARATH	9e-31	54.22	AT5G57685.1 | Symbols: ATGDU3, GDU3, LSB1 | glutamine dumper 3 | chr5:23366356-23366802 REVERSE LENGTH=148	2e-33	54.22	GO:0009615 GO:0019048 GO:0032940 GO:0080143	response to virus; virus-host interaction; secretion by cell; regulation of amino acid export	GO:0003674	molecular function	GO:0005634 GO:0016021	nucleus; integral to membrane	NA	NA	NA	NA	NA	NA	NA	NA	NA	NA
Glyma06g06300	311	UniRef100_C6T776 Putative uncharacterized protein (Fragment) n=2 Tax=Glycine max RepID=C6T776_SOYBN	0	83.6	UniRef100_G7JPB9 Constans n=1 Tax=Medicago truncatula RepID=G7JPB9_MEDTR	2e-136	99.68	AT5G24930.1 | Symbols: ATCOL4, COL4 | CONSTANS-like 4 | chr5:8589325-8590949 FORWARD LENGTH=406	2e-110	99.36	GO:0000165 GO:0006355 GO:0006612 GO:0009617 GO:0009862 GO:0009867 GO:0009965 GO:0010310 GO:0010363 GO:0030003 GO:0030154 GO:0031348 GO:0035304 GO:0045893 GO:0070838	MAPK cascade; regulation of transcription, DNA-dependent; protein targeting to membrane; response to bacterium; systemic acquired resistance, salicylic acid mediated signaling pathway; jasmonic acid mediated signaling pathway; leaf morphogenesis; regulation of hydrogen peroxide metabolic process; regulation of plant-type hypersensitive response; cellular cation homeostasis; cell differentiation; …	GO:0003700 GO:0008270	sequence-specific DNA binding transcription factor activity; zinc ion binding	GO:0005634	nucleus	PF00643 PF06203	B-box zinc finger; CCT motif	NA	NA	KOG1601	GATA-4/5/6_transcription_factors	NA	NA	NA	NA
Glyma06g06310	315	UniRef100_I1K8K7 Uncharacterized protein n=1 Tax=Glycine max RepID=I1K8K7_SOYBN	0	99.68	UniRef100_G7J977 Protein phosphatase 2C n=1 Tax=Medicago truncatula RepID=G7J977_MEDTR	0	91.11	AT4G31750.1 | Symbols: WIN2 | HOPW1-1-interacting 2 | chr4:15364657-15367207 REVERSE LENGTH=311	0	90.79	GO:0006470 GO:0042742 GO:0044419	protein dephosphorylation; defense response to bacterium; interspecies interaction between organisms	GO:0003824 GO:0004722	catalytic activity; protein serine/threonine phosphatase activity	GO:0005886 GO:0008287	plasma membrane; protein serine/threonine phosphatase complex	PF00481	Protein phosphatase 2C	PTHR13832 PTHR13832:SF186	PROTEIN PHOSPHATASE 2C; SUBFAMILY NOT NAMED	KOG0698	Serine/threonine_protein_phosphatase	NA	NA	NA	NA
Glyma06g06340	290	UniRef100_I1K8K9 Uncharacterized protein n=1 Tax=Glycine max RepID=I1K8K9_SOYBN	0	99.66	UniRef100_E4MXX3 mRNA, clone: RTFL01-25-G03 n=1 Tax=Eutrema halophilum RepID=E4MXX3_THEHA	2e-151	86.9	AT5G10750.1 | Symbols: | Protein of unknown function (DUF1336) | chr5:3399072-3399980 FORWARD LENGTH=302	7e-155	87.24	GO:0008150	biological process	GO:0003674	molecular function	GO:0005634	nucleus	PF07059	Protein of unknown function (DUF1336)	NA	NA	NA	NA	NA	NA	NA	NA
Glyma06g06350	327	UniRef100_I1K8L0 Uncharacterized protein n=1 Tax=Glycine max RepID=I1K8L0_SOYBN	0	98.47	UniRef100_C9WF03 Class III peroxidase n=1 Tax=Gossypium hirsutum RepID=C9WF03_GOSHI	1e-156	95.11	AT2G24800.1 | Symbols: | Peroxidase superfamily protein | chr2:10571255-10572570 REVERSE LENGTH=329	3e-144	91.13	GO:0006979 GO:0055114	response to oxidative stress; oxidation-reduction process	GO:0004601 GO:0020037	peroxidase activity; heme binding	GO:0005576	extracellular region	PF00141	Peroxidase	NA	NA	NA	NA	1.11.1.7	Peroxidase	K00430	peroxidase_[EC:1.11.1.7]
Glyma06g06360	351	UniRef100_I1K8L1 Uncharacterized protein (Fragment) n=1 Tax=Glycine max RepID=I1K8L1_SOYBN	0	100	UniRef100_G7J9S6 Lariat debranching enzyme n=1 Tax=Medicago truncatula RepID=G7J9S6_MEDTR	3e-137	75.5	AT4G31770.1 | Symbols: ATDBR1, DBR1 | debranching enzyme 1 | chr4:15370296-15372422 REVERSE LENGTH=418	3e-106	74.93	GO:0006397 GO:0009790	mRNA processing; embryo development	GO:0004722 GO:0008419 GO:0016787 GO:0016788	protein serine/threonine phosphatase activity; RNA lariat debranching enzyme activity; hydrolase activity; hydrolase activity, acting on ester bonds	GO:0005634	nucleus	PF00149 PF05011	Calcineurin-like phosphoesterase; Lariat debranching enzyme, C-terminal domain	PTHR12849	RNA LARIAT DEBRANCHING ENZYME	NA	NA	NA	NA	NA	NA
Glyma06g06370	541	UniRef100_I1K8L2 Uncharacterized protein n=1 Tax=Glycine max RepID=I1K8L2_SOYBN	0	99.82	UniRef100_G7J9S7 Rieske iron-sulfur protein Tic55 n=1 Tax=Medicago truncatula RepID=G7J9S7_MEDTR	0	99.82	AT2G24820.1 | Symbols: TIC55-II | translocon at the inner envelope membrane of chloroplasts 55-II | chr2:10575038-10576829 FORWARD LENGTH=539	0	92.61	GO:0045036 GO:0055114	protein targeting to chloroplast; oxidation-reduction process	GO:0010277 GO:0016491 GO:0051537	chlorophyllide a oxygenase [overall] activity; oxidoreductase activity; 2 iron, 2 sulfur cluster binding	GO:0009507 GO:0009941	chloroplast; chloroplast envelope	PF08417 PF00355	Pheophorbide a oxygenase; Rieske [2Fe-2S] domain	PTHR21266 PTHR21266:SF20	IRON-SULFUR DOMAIN CONTAINING PROTEIN; SUBFAMILY NOT NAMED	NA	NA	NA	NA	NA	NA
Glyma06g06380	140	UniRef100_I1K8L3 Uncharacterized protein n=1 Tax=Glycine max RepID=I1K8L3_SOYBN	1e-95	99.29	UniRef100_G7J9S8 Tsi1-interacting protein TSIP1 n=1 Tax=Medicago truncatula RepID=G7J9S8_MEDTR	8e-51	76.43	AT2G24860.1 | Symbols: | DnaJ/Hsp40 cysteine-rich domain superfamily protein | chr2:10587118-10588240 REVERSE LENGTH=144	7e-48	69.29	NA	NA	GO:0031072 GO:0051082	heat shock protein binding; unfolded protein binding	GO:0005576	extracellular region	NA	NA	NA	NA	NA	NA	NA	NA	NA	NA
Glyma06g06390	112	UniRef100_I1K8L5 Uncharacterized protein n=1 Tax=Glycine max RepID=I1K8L5_SOYBN	6e-76	99.11	UniRef100_B9RNT1 Steroid binding protein, putative n=1 Tax=Ricinus communis RepID=B9RNT1_RICCO	2e-54	88.39	AT2G24940.1 | Symbols: AtMAPR2, MAPR2 | membrane-associated progesterone binding protein 2 | chr2:10609447-10609749 FORWARD LENGTH=100	9e-56	89.29	NA	NA	GO:0020037	heme binding	GO:0005576 GO:0005829	extracellular region; cytosol	PF00173	Cytochrome b5-like Heme/Steroid binding domain	PTHR10281	MEMBRANE ASSOCIATED PROGESTERONE RECEPTOR-RELATED	NA	NA	NA	NA	NA	NA
Glyma06g06400	552	UniRef100_I1K8L6 Uncharacterized protein n=1 Tax=Glycine max RepID=I1K8L6_SOYBN	0	86.23	NA	NA	NA	AT2G24960.2 | Symbols: | unknown protein; FUNCTIONS IN: molecular_function unknown; INVOLVED IN: biological_process unknown; LOCATED IN: cellular_component unknown; EXPRESSED IN: 21 plant structures; EXPRESSED DURING: 12 growth stages; BEST Arabidopsis thaliana protein match is: unknown protein (TAIR:AT4G02210.2); Has 30201 Blast hits to 17322 proteins in 780 species: Archae - 12; Bacteria - 1396…	5e-77	52.54	GO:0008150	biological process	GO:0003674	molecular function	GO:0005634	nucleus	NA	NA	NA	NA	NA	NA	NA	NA	NA	NA
Glyma06g06420	346	UniRef100_UPI00018C6F49 UPI00018C6F49 related cluster n=1 Tax=unknown RepID=UPI00018C6F49	0	99.71	UniRef100_B9RNU7 Protein phosphatase 2c, putative n=1 Tax=Ricinus communis RepID=B9RNU7_RICCO	0	99.71	AT4G31860.1 | Symbols: | Protein phosphatase 2C family protein | chr4:15406685-15408589 REVERSE LENGTH=357	0	99.42	GO:0006470 GO:0006499 GO:0009610 GO:0016036 GO:0019375 GO:0042631	protein dephosphorylation; N-terminal protein myristoylation; response to symbiotic fungus; cellular response to phosphate starvation; galactolipid biosynthetic process; cellular response to water deprivation	GO:0003824 GO:0004722	catalytic activity; protein serine/threonine phosphatase activity	GO:0005634 GO:0005886 GO:0008287	nucleus; plasma membrane; protein serine/threonine phosphatase complex	PF00481	Protein phosphatase 2C	PTHR13832 PTHR13832:SF140	PROTEIN PHOSPHATASE 2C; SUBFAMILY NOT NAMED	KOG0697 KOG0698	Protein_phosphatase_1B_(formerly_2C) Serine/threonine_protein_phosphatase	3.1.3.16	Serine/threonine_specific_protein_phosphatase.	K01090	protein_phosphatase_[EC:3.1.3.16]
Glyma06g06430	1114	UniRef100_I1K8L8 Uncharacterized protein n=2 Tax=Glycine max RepID=I1K8L8_SOYBN	0	81.51	UniRef100_G7J9T7 Pentatricopeptide repeat-containing protein n=1 Tax=Medicago truncatula RepID=G7J9T7_MEDTR	0	99.82	AT4G31850.1 | Symbols: PGR3 | proton gradient regulation 3 | chr4:15403020-15406358 FORWARD LENGTH=1112	0	99.64	GO:0000023 GO:0000272 GO:0005982 GO:0006098 GO:0006655 GO:0008150 GO:0009664 GO:0009902 GO:0010027 GO:0010075 GO:0019252 GO:0019288 GO:0034660 GO:0046777	maltose metabolic process; polysaccharide catabolic process; starch metabolic process; pentose-phosphate shunt; phosphatidylglycerol biosynthetic process; biological process; plant-type cell wall organization; chloroplast relocation; thylakoid membrane organization; regulation of meristem growth; starch biosynthetic process; isopentenyl diphosphate biosynthetic process, mevalonate-independent pat…	NA	NA	NA	NA	PF01535	PPR repeat	PTHR24015 PTHR24015:SF61	FAMILY NOT NAMED; PGR3 (PROTON GRADIENT REGULATION 3)	NA	NA	NA	NA	NA	NA
Glyma06g06440	212	UniRef100_I1K8L9 Uncharacterized protein n=1 Tax=Glycine max RepID=I1K8L9_SOYBN	4e-151	99.53	UniRef100_G7J9T9 Nuclear nucleic acid-binding protein C1D n=1 Tax=Medicago truncatula RepID=G7J9T9_MEDTR	4e-103	97.64	AT5G25080.1 | Symbols: | Sas10/Utp3/C1D family | chr5:8643782-8646306 FORWARD LENGTH=217	4e-73	92.92	GO:0008150	biological process	GO:0003674	molecular function	GO:0005634	nucleus	PF04000	Sas10/Utp3/C1D family	PTHR15341 PTHR15341:SF3	SUN-COR STEROID HORMONE RECEPTOR CO-REPRESSOR; SUN-COR STEROID HORMONE RECEPTOR CO-REPRESSOR	KOG4835	DNA-binding_protein_C1D_involved_in_regulation_of_double-strand_break_repair	NA	NA	K12592	exosome_complex_protein_LRP1
Glyma06g06450	176	UniRef100_I1K8M1 Uncharacterized protein n=1 Tax=Glycine max RepID=I1K8M1_SOYBN	2e-126	99.43	UniRef100_G7J9U0 Early nodulin-like protein n=1 Tax=Medicago truncatula RepID=G7J9U0_MEDTR	1e-79	87.5	AT2G25060.1 | Symbols: ENODL14, AtENODL14 | early nodulin-like protein 14 | chr2:10662308-10662930 FORWARD LENGTH=182	1e-60	87.5	GO:0000226 GO:0000911 GO:0016572	microtubule cytoskeleton organization; cytokinesis by cell plate formation; histone phosphorylation	GO:0005507 GO:0009055	copper ion binding; electron carrier activity	GO:0005576 GO:0005886 GO:0009506 GO:0031225 GO:0046658	extracellular region; plasma membrane; plasmodesma; anchored to membrane; anchored to plasma membrane	PF02298	Plastocyanin-like domain	NA	NA	NA	NA	NA	NA	NA	NA
Glyma06g06460	638	UniRef100_I1K8M2 Uncharacterized protein n=1 Tax=Glycine max RepID=I1K8M2_SOYBN	0	99.84	UniRef100_G7J9U2 Transmembrane 9 superfamily protein member n=1 Tax=Medicago truncatula RepID=G7J9U2_MEDTR	0	97.02	AT5G10840.1 | Symbols: | Endomembrane protein 70 protein family | chr5:3424910-3427797 REVERSE LENGTH=648	0	99.06	GO:0006499	N-terminal protein myristoylation	NA	NA	GO:0005739 GO:0005768 GO:0005774 GO:0005794 GO:0005802 GO:0009505 GO:0016021	mitochondrion; endosome; vacuolar membrane; Golgi apparatus; trans-Golgi network; plant-type cell wall; integral to membrane	PF02990	Endomembrane protein 70	PTHR10766	TRANSMEMBRANE 9 SUPERFAMILY PROTEIN MEMBER	KOG1278	Endosomal_membrane_proteins,_EMP70	NA	NA	NA	NA
Glyma06g06470	612	UniRef100_UPI0002339426 UPI0002339426 related cluster n=1 Tax=unknown RepID=UPI0002339426	0	99.84	UniRef100_G7I878 BTB/POZ domain-containing protein n=1 Tax=Medicago truncatula RepID=G7I878_MEDTR	0	99.84	AT4G31820.1 | Symbols: ENP, NPY1, MAB4 | Phototropic-responsive NPH3 family protein | chr4:15390788-15393627 REVERSE LENGTH=571	0	92.65	GO:0009416 GO:0009908 GO:0009911 GO:0010229 GO:0010540 GO:0045176 GO:0048825 GO:0048827	response to light stimulus; flower development; positive regulation of flower development; inflorescence development; basipetal auxin transport; apical protein localization; cotyledon development; phyllome development	GO:0004871	signal transducer activity	GO:0005770 GO:0005886	late endosome; plasma membrane	PF03000 PF00651	NPH3 family; BTB/POZ domain	PTHR13690 PTHR13690:SF174	KELCH-RELATED; KELCH-RELATED	NA	NA	NA	NA	NA	NA
Glyma06g06480	1206	UniRef100_UPI0002339EA7 UPI0002339EA7 related cluster n=1 Tax=unknown RepID=UPI0002339EA7	0	99.92	UniRef100_I1K8M4 DNA-directed RNA polymerase n=1 Tax=Glycine max RepID=I1K8M4_SOYBN	0	93.12	AT3G23780.2 | Symbols: NRPD2A | nuclear RNA polymerase D2A | chr3:8567971-8573819 REVERSE LENGTH=1172	0	97.93	GO:0006306 GO:0006351 GO:0030422 GO:0031047 GO:0035194 GO:0050776 GO:0050832	DNA methylation; transcription, DNA-dependent; production of siRNA involved in RNA interference; gene silencing by RNA; posttranscriptional gene silencing by RNA; regulation of immune response; defense response to fungus	GO:0003677 GO:0003899 GO:0005515 GO:0032549	DNA binding; DNA-directed RNA polymerase activity; protein binding; ribonucleoside binding	GO:0000418 GO:0000419 GO:0005634 GO:0005720 GO:0030880	DNA-directed RNA polymerase IV complex; DNA-directed RNA polymerase V complex; nucleus; nuclear heterochromatin; RNA polymerase complex	PF04567 PF04565 PF04566 PF04561 PF04563 PF04560 PF00562	RNA polymerase Rpb2, domain 5; RNA polymerase Rpb2, domain 3; RNA polymerase Rpb2, domain 4; RNA polymerase Rpb2, domain 2; RNA polymerase beta subunit; RNA polymerase Rpb2, domain 7; RNA polymerase Rpb2, domain 6	PTHR20856 PTHR20856:SF6	DNA-DIRECTED RNA POLYMERASE I SUBUNIT 2; DNA-DIRECTED RNA POLYMERASE SUBUNIT 2	KOG0214	RNA_polymerase_II,_second_largest_subunit	NA	NA	NA	NA
Glyma06g06500	373	UniRef100_I1K8M6 Uncharacterized protein n=1 Tax=Glycine max RepID=I1K8M6_SOYBN	0	94.64	UniRef100_B9RNW1 Transcription factor, putative n=1 Tax=Ricinus communis RepID=B9RNW1_RICCO	9e-52	89.01	AT4G31805.1 | Symbols: | WRKY family transcription factor | chr4:15385454-15386775 FORWARD LENGTH=344	1e-32	83.65	GO:0006355	regulation of transcription, DNA-dependent	GO:0003700	sequence-specific DNA binding transcription factor activity	GO:0005634	nucleus	NA	NA	NA	NA	NA	NA	NA	NA	NA	NA
Glyma06g06530	295	UniRef100_C6TEF4 Uncharacterized protein n=2 Tax=Glycine max RepID=C6TEF4_SOYBN	0	99.66	UniRef100_G7J9V1 WRKY transcription factor n=1 Tax=Medicago truncatula RepID=G7J9V1_MEDTR	3e-115	96.27	AT1G80840.1 | Symbols: WRKY40, ATWRKY40 | WRKY DNA-binding protein 40 | chr1:30383834-30385356 FORWARD LENGTH=302	3e-70	94.24	GO:0000165 GO:0002237 GO:0002679 GO:0006355 GO:0006612 GO:0006944 GO:0009595 GO:0009611 GO:0009612 GO:0009620 GO:0009646 GO:0009695 GO:0009697 GO:0009723 GO:0009738 GO:0009751 GO:0009753 GO:0009862 GO:0009863 GO:0009867 GO:0009873 GO:0010200 GO:0010310 GO:0010363 GO:0016045 GO:0030968 GO:0031347 GO:0031348 GO:0035556 GO:0042742 GO:0043069 GO:0043900 GO:0050691 GO:0050776 GO:0050832	MAPK cascade; response to molecule of bacterial origin; respiratory burst involved in defense response; regulation of transcription, DNA-dependent; protein targeting to membrane; cellular membrane fusion; detection of biotic stimulus; response to wounding; response to mechanical stimulus; response to fungus; response to absence of light; jasmonic acid biosynthetic process; salicylic acid biosynth…	GO:0003700 GO:0005515 GO:0043565	sequence-specific DNA binding transcription factor activity; protein binding; sequence-specific DNA binding	GO:0005634	nucleus	PF03106	WRKY DNA -binding domain	NA	NA	NA	NA	NA	NA	NA	NA
Glyma06g06540	59	NA	NA	NA	NA	NA	NA	NA	NA	NA	NA	NA	NA	NA	NA	NA	NA	NA	NA	NA	NA	NA	NA	NA	NA	NA
Glyma06g06550	470	UniRef100_UPI000233958F UPI000233958F related cluster n=1 Tax=unknown RepID=UPI000233958F	0	95.11	UniRef100_B0I556 Protein kinase n=1 Tax=Phaseolus vulgaris RepID=B0I556_PHAVU	0	95.11	AT5G25110.1 | Symbols: CIPK25, SnRK3.25 | CBL-interacting protein kinase 25 | chr5:8657740-8659206 REVERSE LENGTH=488	0	90.85	GO:0006468 GO:0007165 GO:0050832	protein phosphorylation; signal transduction; defense response to fungus	GO:0004672 GO:0004674 GO:0005524 GO:0016301 GO:0016772	protein kinase activity; protein serine/threonine kinase activity; ATP binding; kinase activity; transferase activity, transferring phosphorus-containing groups	GO:0005886	plasma membrane	PF03822 PF00069	NAF domain; Protein kinase domain	PTHR24343 PTHR24343:SF45	SERINE/THREONINE KINASE; SERINE/THREONINE-PROTEIN KINASE PTK1,2/STK1,2	KOG0583	Serine/threonine_protein_kinase	NA	NA	NA	NA
Glyma06g06570	664	UniRef100_I1K8N0 Uncharacterized protein n=2 Tax=Glycine max RepID=I1K8N0_SOYBN	0	99.85	UniRef100_G7J9V2 Transcription initiation factor TFIID subunit n=1 Tax=Medicago truncatula RepID=G7J9V2_MEDTR	0	99.85	AT5G25150.1 | Symbols: TAF5 | TBP-associated factor 5 | chr5:8677117-8682058 FORWARD LENGTH=669	0	99.55	GO:0000394 GO:0006355 GO:0006366 GO:0007062 GO:0007131 GO:0033044 GO:0042138 GO:0045132	RNA splicing, via endonucleolytic cleavage and ligation; regulation of transcription, DNA-dependent; transcription from RNA polymerase II promoter; sister chromatid cohesion; reciprocal meiotic recombination; regulation of chromosome organization; meiotic DNA double-strand break formation; meiotic chromosome segregation	GO:0000166	nucleotide binding	GO:0005634	nucleus	PF04494 PF00400	WD40 associated region in TFIID subunit; WD domain, G-beta repeat	PTHR19879	WD40 REPEAT PROTEIN	KOG0263	Transcription_initiation_factor_TFIID,_subunit_TAF5_(also_component_of_histone_acetyltransferase_SAGA)	NA	NA	K03130	transcription_initiation_factor_TFIID_subunit_5
Glyma06g06590	385	UniRef100_I1K8N2 Uncharacterized protein n=1 Tax=Glycine max RepID=I1K8N2_SOYBN	6e-137	53.25	UniRef100_G7KKA2 Mitochondrial protein, putative n=1 Tax=Medicago truncatula RepID=G7KKA2_MEDTR	1e-50	43.64	AT2G31270.1 | Symbols: ATCDT1A, CDT1A, CDT1 | homolog of yeast CDT1 A | chr2:13329037-13331544 FORWARD LENGTH=571	6e-19	29.09	GO:0006084 GO:0006260 GO:0006261 GO:0006270 GO:0006275 GO:0006342 GO:0009658 GO:0009909 GO:0010389 GO:0016458 GO:0016572 GO:0034968 GO:0048229 GO:0051276 GO:0051567 GO:0051726	acetyl-CoA metabolic process; DNA replication; DNA-dependent DNA replication; DNA replication initiation; regulation of DNA replication; chromatin silencing; chloroplast organization; regulation of flower development; regulation of G2/M transition of mitotic cell cycle; gene silencing; histone phosphorylation; histone lysine methylation; gametophyte development; chromosome organization; histone H…	GO:0004693 GO:0005515 GO:0019901 GO:0070182	cyclin-dependent protein kinase activity; protein binding; protein kinase binding; DNA polymerase binding	GO:0005634 GO:0009507	nucleus; chloroplast	PF08839	DNA replication factor CDT1 like	NA	NA	NA	NA	NA	NA	NA	NA
Glyma06g06630	924	UniRef100_I1K8N3 Uncharacterized protein n=1 Tax=Glycine max RepID=I1K8N3_SOYBN	0	99.68	UniRef100_G7I899 Sister chromatid cohesion protein PDS5-like protein n=1 Tax=Medicago truncatula RepID=G7I899_MEDTR	0	93.18	AT4G31880.2 | Symbols: | LOCATED IN: cytosol; EXPRESSED IN: 24 plant structures; EXPRESSED DURING: 14 growth stages; BEST Arabidopsis thaliana protein match is: Tudor/PWWP/MBT superfamily protein (TAIR:AT1G15940.1). | chr4:15419435-15423939 REVERSE LENGTH=872	5e-158	85.06	GO:0006312 GO:0007062 GO:0009560 GO:0009630 GO:0031048 GO:0045132	mitotic recombination; sister chromatid cohesion; embryo sac egg cell differentiation; gravitropism; chromatin silencing by small RNA; meiotic chromosome segregation	NA	NA	GO:0005634 GO:0005829 GO:0009507	nucleus; cytosol; chloroplast	NA	NA	PTHR12663	ANDROGEN INDUCED INHIBITOR OF PROLIFERATION (AS3) / PDS5-RELATED	NA	NA	NA	NA	NA	NA
Glyma06g06640	888	UniRef100_I1K8N6 Uncharacterized protein n=1 Tax=Glycine max RepID=I1K8N6_SOYBN	0	97.52	UniRef100_G7I899 Sister chromatid cohesion protein PDS5-like protein n=1 Tax=Medicago truncatula RepID=G7I899_MEDTR	0	99.55	AT4G31880.1 | Symbols: | LOCATED IN: cytosol, chloroplast; EXPRESSED IN: 24 plant structures; EXPRESSED DURING: 14 growth stages; BEST Arabidopsis thaliana protein match is: Tudor/PWWP/MBT superfamily protein (TAIR:AT1G15940.1); Has 137162 Blast hits to 70781 proteins in 2973 species: Archae - 289; Bacteria - 24182; Metazoa - 56725; Fungi - 20130; Plants - 6559; Viruses - 758; Other Eukaryotes - …	7e-156	86.49	GO:0006312 GO:0007062 GO:0009560 GO:0009630 GO:0031048 GO:0045132	mitotic recombination; sister chromatid cohesion; embryo sac egg cell differentiation; gravitropism; chromatin silencing by small RNA; meiotic chromosome segregation	NA	NA	GO:0005634 GO:0005829 GO:0009507	nucleus; cytosol; chloroplast	NA	NA	PTHR12663	ANDROGEN INDUCED INHIBITOR OF PROLIFERATION (AS3) / PDS5-RELATED	NA	NA	NA	NA	NA	NA
Glyma06g06650	918	UniRef100_UPI0002339599 UPI0002339599 related cluster n=1 Tax=unknown RepID=UPI0002339599	0	99.89	UniRef100_G7I899 Sister chromatid cohesion protein PDS5-like protein n=1 Tax=Medicago truncatula RepID=G7I899_MEDTR	0	99.78	AT4G31880.1 | Symbols: | LOCATED IN: cytosol, chloroplast; EXPRESSED IN: 24 plant structures; EXPRESSED DURING: 14 growth stages; BEST Arabidopsis thaliana protein match is: Tudor/PWWP/MBT superfamily protein (TAIR:AT1G15940.1); Has 137162 Blast hits to 70781 proteins in 2973 species: Archae - 289; Bacteria - 24182; Metazoa - 56725; Fungi - 20130; Plants - 6559; Viruses - 758; Other Eukaryotes - …	4e-172	83.66	GO:0006312 GO:0007062 GO:0009560 GO:0009630 GO:0031048 GO:0045132	mitotic recombination; sister chromatid cohesion; embryo sac egg cell differentiation; gravitropism; chromatin silencing by small RNA; meiotic chromosome segregation	NA	NA	GO:0005634 GO:0005829 GO:0009507	nucleus; cytosol; chloroplast	NA	NA	PTHR12663	ANDROGEN INDUCED INHIBITOR OF PROLIFERATION (AS3) / PDS5-RELATED	NA	NA	NA	NA	NA	NA
Glyma06g06660	219	UniRef100_I1K8P0 Uncharacterized protein n=1 Tax=Glycine max RepID=I1K8P0_SOYBN	1e-159	99.54	UniRef100_G7J9V5 Stromal cell-derived factor 2-like protein n=1 Tax=Medicago truncatula RepID=G7J9V5_MEDTR	1e-140	99.54	AT2G25110.1 | Symbols: SDF2, ATSDL, AtSDF2 | stromal cell-derived factor 2-like protein precursor | chr2:10684428-10685838 FORWARD LENGTH=218	1e-128	99.09	GO:0006457 GO:0009408 GO:0009627 GO:0009644 GO:0034976 GO:0042542 GO:0042742 GO:0050832 GO:0052033	protein folding; response to heat; systemic acquired resistance; response to high light intensity; response to endoplasmic reticulum stress; response to hydrogen peroxide; defense response to bacterium; defense response to fungus; pathogen-associated molecular pattern dependent induction by symbiont of host innate immune response	GO:0003674	molecular function	GO:0005783 GO:0009507 GO:0016020	endoplasmic reticulum; chloroplast; membrane	PF02815	MIR domain	PTHR10050 PTHR10050:SF6	MANNOSYLTRANSFERASE; STROMAL CELL-DERIVED FACTOR 2-RELATED	KOG3358	Uncharacterized_secreted_protein_SDF2_(Stromal_cell-derived_factor_2),_contains_MIR_domains	NA	NA	NA	NA
Glyma06g06670	480	UniRef100_I1K8P2 Uncharacterized protein n=2 Tax=Glycine max RepID=I1K8P2_SOYBN	0	99.79	UniRef100_G7J9V6 U-box domain-containing protein n=1 Tax=Medicago truncatula RepID=G7J9V6_MEDTR	0	99.79	AT4G31890.2 | Symbols: | ARM repeat superfamily protein | chr4:15427290-15429049 REVERSE LENGTH=518	0	99.79	GO:0008150	biological process	NA	NA	NA	NA	NA	NA	PTHR23315 PTHR23315:SF38	BETA CATENIN-RELATED ARMADILLO REPEAT-CONTAINING; ARMADILLO/BETA-CATENIN REPEAT FAMILY PROTEIN	NA	NA	NA	NA	NA	NA
Glyma06g06690	617	UniRef100_I1JU82 Uncharacterized protein n=1 Tax=Glycine max RepID=I1JU82_SOYBN	0	99.84	UniRef100_Q9LLI0 ClpB n=1 Tax=Phaseolus lunatus RepID=Q9LLI0_PHALU	0	99.68	AT2G25140.1 | Symbols: HSP98.7, CLPB-M, CLPB4 | casein lytic proteinase B4 | chr2:10697877-10701998 REVERSE LENGTH=964	0	98.7	GO:0006457 GO:0009408 GO:0009644 GO:0016485 GO:0019538 GO:0042542	protein folding; response to heat; response to high light intensity; protein processing; protein metabolic process; response to hydrogen peroxide	GO:0000166 GO:0005524 GO:0016887 GO:0017111	nucleotide binding; ATP binding; ATPase activity; nucleoside-triphosphatase activity	GO:0005737 GO:0005739 GO:0009507 GO:0009570 GO:0009941	cytoplasm; mitochondrion; chloroplast; chloroplast stroma; chloroplast envelope	PF00004 PF07724 PF10431	ATPase family associated with various cellular activities (AAA); AAA domain (Cdc48 subfamily); C-terminal, D2-small domain, of ClpB protein	PTHR11638 PTHR11638:SF18	ATP-DEPENDENT CLP PROTEASE; CLPC	KOG1051	Chaperone_HSP104_and_related_ATP-dependent_Clp_proteases	NA	NA	NA	NA
Glyma06g06700	274	UniRef100_I1K8P4 Uncharacterized protein n=1 Tax=Glycine max RepID=I1K8P4_SOYBN	0	99.64	UniRef100_B9RNX3 Ccr4-associated factor, putative n=1 Tax=Ricinus communis RepID=B9RNX3_RICCO	0	98.91	AT2G32070.1 | Symbols: | Polynucleotidyl transferase, ribonuclease H-like superfamily protein | chr2:13640829-13641656 REVERSE LENGTH=275	9e-158	98.91	GO:0006499 GO:0009451	N-terminal protein myristoylation; RNA modification	GO:0003676 GO:0004540	nucleic acid binding; ribonuclease activity	GO:0005634	nucleus	PF04857	CAF1 family ribonuclease	PTHR10797	CCR4-ASSOCIATED FACTOR	KOG0304	mRNA_deadenylase_subunit	NA	NA	K12581	CCR4-NOT_transcription_complex_subunit_7/8
Glyma06g06720	1441	UniRef100_I1K8P5 Uncharacterized protein n=1 Tax=Glycine max RepID=I1K8P5_SOYBN	0	99.93	UniRef100_G7J9W2 Chromatin remodeling complex subunit n=1 Tax=Medicago truncatula RepID=G7J9W2_MEDTR	0	99.24	AT2G25170.1 | Symbols: PKL, GYM, CHD3, CHR6, SSL2 | chromatin remodeling factor CHD3 (PICKLE) | chr2:10714411-10723763 FORWARD LENGTH=1384	0	92.78	GO:0006346 GO:0008283 GO:0009733 GO:0009736 GO:0009739 GO:0009788 GO:0016246 GO:0016568 GO:0045892 GO:0048364 GO:2000023	methylation-dependent chromatin silencing; cell proliferation; response to auxin stimulus; cytokinin mediated signaling pathway; response to gibberellin stimulus; negative regulation of abscisic acid mediated signaling pathway; RNA interference; chromatin modification; negative regulation of transcription, DNA-dependent; root development; regulation of lateral root development	GO:0003674 GO:0003676 GO:0003677 GO:0003678 GO:0004386 GO:0005524 GO:0008270 GO:0016887	molecular function; nucleic acid binding; DNA binding; DNA helicase activity; helicase activity; ATP binding; zinc ion binding; ATPase activity	GO:0005634	nucleus	PF00628 PF08074 PF06465 PF00271 PF06461 PF00385 PF00176	PHD-finger; CHDCT2 (NUC038) domain; Domain of Unknown Function (DUF1087); Helicase conserved C-terminal domain; Domain of Unknown Function (DUF1086); chromo' (CHRromatin Organisation MOdifier) domain; SNF2 family N-terminal domain	PTHR10799 PTHR10799:SF131	ATP-DEPENDENT HELICASE SMARCA (SWI/SNF-RELATED MATRIX-ASSOCIATED ACTIN-DEPENDENT REGULATOR OF CHROMATIN A)-RELATED; SWI/SNF CHROMATIN REMODELING COMPLEX COMPONENT	KOG0384	Chromodomain-helicase_DNA-binding_protein	3.6.4.12	NA	K11643	chromodomain-helicase-DNA-binding_protein_4_[EC:3.6.4.12]
Glyma06g06730	697	UniRef100_I1K8P7 Uncharacterized protein n=1 Tax=Glycine max RepID=I1K8P7_SOYBN	0	99.86	UniRef100_G7J9W3 Two-component response regulator ARR1 n=1 Tax=Medicago truncatula RepID=G7J9W3_MEDTR	0	96.56	AT2G25180.1 | Symbols: ARR12, RR12 | response regulator 12 | chr2:10724490-10726961 REVERSE LENGTH=596	5e-134	65.14	GO:0000160 GO:0006355 GO:0009735 GO:0009736 GO:0010380 GO:0031537 GO:0048367 GO:0080022	phosphorelay signal transduction system; regulation of transcription, DNA-dependent; response to cytokinin stimulus; cytokinin mediated signaling pathway; regulation of chlorophyll biosynthetic process; regulation of anthocyanin metabolic process; shoot development; primary root development	GO:0000156 GO:0003700	phosphorelay response regulator activity; sequence-specific DNA binding transcription factor activity	GO:0005634	nucleus	PF00072 PF00249	Response regulator receiver domain; Myb-like DNA-binding domain	PTHR26402 PTHR26402:SF38	RESPONSE REGULATOR OF TWO-COMPONENT SYSTEM;	NA	NA	NA	NA	K14491	two-component_response_regulator_ARR-B_family
Glyma06g06740	139	UniRef100_I1K8P8 Uncharacterized protein n=1 Tax=Glycine max RepID=I1K8P8_SOYBN	4e-95	99.28	NA	NA	NA	NA	NA	NA	NA	NA	NA	NA	NA	NA	NA	NA	NA	NA	NA	NA	NA	NA	NA	NA
Glyma06g06750	311	UniRef100_I1K8P9 Uncharacterized protein n=2 Tax=Glycine max RepID=I1K8P9_SOYBN	0	94.21	UniRef100_G7J9W4 Zinc finger protein n=1 Tax=Medicago truncatula RepID=G7J9W4_MEDTR	1e-63	71.06	AT5G25160.1 | Symbols: ZFP3 | zinc finger protein 3 | chr5:8687524-8688231 FORWARD LENGTH=235	5e-40	68.17	GO:0006355	regulation of transcription, DNA-dependent	GO:0003676 GO:0003700 GO:0008270	nucleic acid binding; sequence-specific DNA binding transcription factor activity; zinc ion binding	GO:0005622 GO:0005634	intracellular; nucleus	NA	NA	PTHR10032 PTHR10032:SF119	ZINC FINGER PROTEIN-RELATED; ZFP1 (ARABIDOPSIS THALIANA ZINC-FINGER PROTEIN 1),	NA	NA	NA	NA	NA	NA
Glyma06g06760	225	UniRef100_C6T0E5 Uncharacterized protein (Fragment) n=1 Tax=Glycine max RepID=C6T0E5_SOYBN	8e-166	99.56	UniRef100_O81728 Expressed protein n=1 Tax=Arabidopsis thaliana RepID=O81728_ARATH	1e-89	76.89	AT5G25170.1 | Symbols: | PPPDE putative thiol peptidase family protein | chr5:8693257-8694438 FORWARD LENGTH=218	1e-99	80.89	GO:0008150	biological process	GO:0003674	molecular function	GO:0005737 GO:0005886	cytoplasm; plasma membrane	PF05903	PPPDE putative peptidase domain	PTHR12378	UNCHARACTERIZED	KOG0324	Uncharacterized_conserved_protein	NA	NA	NA	NA
Glyma06g06770	334	UniRef100_I1K8Q1 Uncharacterized protein n=1 Tax=Glycine max RepID=I1K8Q1_SOYBN	0	99.7	UniRef100_Q9LEU1 AT5g11000/T30N20_270 n=1 Tax=Arabidopsis thaliana RepID=Q9LEU1_ARATH	3e-74	70.96	AT5G11000.1 | Symbols: | Plant protein of unknown function (DUF868) | chr5:3479166-3480335 REVERSE LENGTH=389	7e-77	70.96	GO:0006857 GO:0008150 GO:0048767	oligopeptide transport; biological process; root hair elongation	GO:0003674	molecular function	GO:0005886 GO:0009507	plasma membrane; chloroplast	PF05910	Plant protein of unknown function (DUF868)	NA	NA	NA	NA	NA	NA	NA	NA
Glyma06g06780	195	UniRef100_I1K8Q2 Uncharacterized protein n=1 Tax=Glycine max RepID=I1K8Q2_SOYBN	2e-142	99.49	UniRef100_G7J9X0 Ethylene-responsive transcription factor SHINE n=2 Tax=Medicago truncatula RepID=G7J9X0_MEDTR	4e-93	98.97	AT5G25190.1 | Symbols: | Integrase-type DNA-binding superfamily protein | chr5:8707007-8707655 REVERSE LENGTH=181	2e-79	99.49	GO:0006355 GO:0009740 GO:0009873 GO:0010162	regulation of transcription, DNA-dependent; gibberellic acid mediated signaling pathway; ethylene mediated signaling pathway; seed dormancy process	GO:0003677 GO:0003700	DNA binding; sequence-specific DNA binding transcription factor activity	GO:0005634	nucleus	PF00847	AP2 domain	NA	NA	NA	NA	NA	NA	NA	NA
Glyma06g06800	280	UniRef100_I1K8Q4 Uncharacterized protein n=2 Tax=Glycine max RepID=I1K8Q4_SOYBN	0	99.64	UniRef100_Q9XIQ9 F13O11.17 protein n=2 Tax=Arabidopsis thaliana RepID=Q9XIQ9_ARATH	3e-64	99.29	AT1G64870.1 | Symbols: | unknown protein; BEST Arabidopsis thaliana protein match is: unknown protein (TAIR:AT3G45200.1); Has 99 Blast hits to 91 proteins in 10 species: Archae - 0; Bacteria - 0; Metazoa - 0; Fungi - 0; Plants - 99; Viruses - 0; Other Eukaryotes - 0 (source: NCBI BLink). | chr1:24102917-24103831 FORWARD LENGTH=304	6e-67	99.29	GO:0008150	biological process	GO:0003674	molecular function	GO:0005575	cellular component	NA	NA	NA	NA	NA	NA	NA	NA	NA	NA
Glyma06g06810	413	UniRef100_I1K8Q5 Uncharacterized protein n=2 Tax=Glycine max RepID=I1K8Q5_SOYBN	0	91.04	UniRef100_G7JLW0 Wall-associated receptor kinase-like protein n=1 Tax=Medicago truncatula RepID=G7JLW0_MEDTR	0	99.52	AT2G25220.1 | Symbols: | Protein kinase superfamily protein | chr2:10742918-10745540 REVERSE LENGTH=414	1e-175	91.77	GO:0006468	protein phosphorylation	GO:0004672 GO:0004674 GO:0004713 GO:0005524 GO:0016301 GO:0016772	protein kinase activity; protein serine/threonine kinase activity; protein tyrosine kinase activity; ATP binding; kinase activity; transferase activity, transferring phosphorus-containing groups	GO:0005886	plasma membrane	PF00069	Protein kinase domain	PTHR24420 PTHR24420:SF449	FAMILY NOT NAMED; SUBFAMILY NOT NAMED	KOG1187	Serine/threonine_protein_kinase	NA	NA	NA	NA
Glyma06g06820	161	UniRef100_I1K8Q6 Uncharacterized protein n=1 Tax=Glycine max RepID=I1K8Q6_SOYBN	2e-110	99.38	NA	NA	NA	AT2G25250.1 | Symbols: | unknown protein; FUNCTIONS IN: molecular_function unknown; INVOLVED IN: biological_process unknown; LOCATED IN: chloroplast; EXPRESSED IN: 23 plant structures; EXPRESSED DURING: 14 growth stages; BEST Arabidopsis thaliana protein match is: unknown protein (TAIR:AT4G32020.1); Has 30 Blast hits to 30 proteins in 7 species: Archae - 0; Bacteria - 0; Metazoa - 0; Fungi - 2; P…	7e-14	98.76	GO:0008150	biological process	GO:0003674	molecular function	GO:0005634	nucleus	NA	NA	NA	NA	NA	NA	NA	NA	NA	NA
Glyma06g06830	436	UniRef100_I1K8Q7 Uncharacterized protein n=1 Tax=Glycine max RepID=I1K8Q7_SOYBN	0	99.77	UniRef100_G7IEI1 SAP30-binding protein n=1 Tax=Medicago truncatula RepID=G7IEI1_MEDTR	0	95.64	AT1G29220.1 | Symbols: | transcriptional regulator family protein | chr1:10210678-10212571 REVERSE LENGTH=351	2e-100	51.38	GO:0008150	biological process	NA	NA	GO:0005634	nucleus	PF07818	HCNGP-like protein	PTHR13464	TRANSCRIPTIONAL REGULATOR PROTEIN HCNGP	NA	NA	NA	NA	NA	NA
Glyma06g06840	525	UniRef100_I1K8R0 Uncharacterized protein n=1 Tax=Glycine max RepID=I1K8R0_SOYBN	0	99.81	UniRef100_G7LJF6 Nucleobase ascorbate transporter n=1 Tax=Medicago truncatula RepID=G7LJF6_MEDTR	0	99.62	AT2G34190.1 | Symbols: | Xanthine/uracil permease family protein | chr2:14437065-14439407 FORWARD LENGTH=524	0	98.86	GO:0006810 GO:0055085	transport; transmembrane transport	GO:0005215 GO:0022857	transporter activity; transmembrane transporter activity	GO:0016020	membrane	PF00860	Permease family	PTHR11119 PTHR11119:SF8	PURINE PERMEASE; SODIUM-DEPENDENT VITAMIN C TRANSPORTER	KOG1292	Xanthine/uracil_transporters	NA	NA	NA	NA
Glyma06g06850	381	UniRef100_I1K8R1 Uncharacterized protein n=1 Tax=Glycine max RepID=I1K8R1_SOYBN	0	99.74	UniRef100_B9S8B2 Glycogen synthase kinase-3 beta, putative n=2 Tax=Ricinus communis RepID=B9S8B2_RICCO	0	99.74	AT4G18710.1 | Symbols: BIN2, DWF12, UCU1, ATSK21, SK21 | Protein kinase superfamily protein | chr4:10296474-10298913 FORWARD LENGTH=380	0	99.74	GO:0006096 GO:0006468 GO:0006833 GO:0006972 GO:0007030 GO:0009266 GO:0009651 GO:0009729 GO:0009733 GO:0009742 GO:0009825 GO:0009965 GO:0046686 GO:0046777 GO:0046827 GO:0048767	glycolysis; protein phosphorylation; water transport; hyperosmotic response; Golgi organization; response to temperature stimulus; response to salt stress; detection of brassinosteroid stimulus; response to auxin stimulus; brassinosteroid mediated signaling pathway; multidimensional cell growth; leaf morphogenesis; response to cadmium ion; protein autophosphorylation; positive regulation of prote…	GO:0004672 GO:0004674 GO:0004713 GO:0005515 GO:0005524 GO:0016301 GO:0016772	protein kinase activity; protein serine/threonine kinase activity; protein tyrosine kinase activity; protein binding; ATP binding; kinase activity; transferase activity, transferring phosphorus-containing groups	GO:0005886	plasma membrane	PF00069	Protein kinase domain	PTHR24057	GLYCOGEN SYNTHASE KINASE-3 ALPHA	KOG0658	Glycogen_synthase_kinase-3	2.7.11.1	non-specific_serine/threonine_protein_kinase	K14502	protein_brassinosteroid_insensitive_2_[EC:2.7.11.1]
Glyma06g06860	259	UniRef100_UPI0002339FFB UPI0002339FFB related cluster n=1 Tax=unknown RepID=UPI0002339FFB	0	99.61	UniRef100_D7LGY3 Zinc finger family protein n=1 Tax=Arabidopsis lyrata subsp. lyrata RepID=D7LGY3_ARALL	4e-21	34.36	AT2G34200.1 | Symbols: | RING/FYVE/PHD zinc finger superfamily protein | chr2:14441105-14441882 FORWARD LENGTH=222	8e-24	34.36	NA	NA	GO:0008270	zinc ion binding	GO:0005794 GO:0016020	Golgi apparatus; membrane	NA	NA	PTHR23012 PTHR23012:SF31	MEMBRANE ASSOCIATED RING FINGER; PUTATIVE UNCHARACTERIZED PROTEIN OSJNBB0036G09.1 (	NA	NA	NA	NA	NA	NA
Glyma06g06870	976	UniRef100_I1K8R3 Uncharacterized protein n=1 Tax=Glycine max RepID=I1K8R3_SOYBN	0	99.9	UniRef100_B9I1I4 Cellulose synthase n=1 Tax=Populus trichocarpa RepID=B9I1I4_POPTR	0	99.9	AT4G18780.1 | Symbols: CESA8, IRX1, ATCESA8, LEW2 | cellulose synthase family protein | chr4:10312846-10316719 REVERSE LENGTH=985	0	99.9	GO:0006970 GO:0009414 GO:0009832 GO:0009834 GO:0010116 GO:0010413 GO:0030244 GO:0042742 GO:0045492 GO:0050832	response to osmotic stress; response to water deprivation; plant-type cell wall biogenesis; secondary cell wall biogenesis; positive regulation of abscisic acid biosynthetic process; glucuronoxylan metabolic process; cellulose biosynthetic process; defense response to bacterium; xylan biosynthetic process; defense response to fungus	GO:0016757 GO:0016759 GO:0016760	transferase activity, transferring glycosyl groups; cellulose synthase activity; cellulose synthase (UDP-forming) activity	GO:0005618 GO:0005886 GO:0016020	cell wall; plasma membrane; membrane	PF03552	Cellulose synthase	PTHR13301 PTHR13301:SF23	X-BOX TRANSCRIPTION FACTOR-RELATED;	NA	NA	2.4.1.12	Cellulose_synthase_(UDP-forming)	K10999	cellulose_synthase_A_[EC:2.4.1.12]
Glyma06g06880	255	UniRef100_I1K8R4 Uncharacterized protein n=1 Tax=Glycine max RepID=I1K8R4_SOYBN	0	99.61	UniRef100_G7JFP1 DNA-directed RNA polymerase n=1 Tax=Medicago truncatula RepID=G7JFP1_MEDTR	1e-13	70.98	AT4G32030.1 | Symbols: | unknown protein; BEST Arabidopsis thaliana protein match is: unknown protein (TAIR:AT1G80610.1); Has 63 Blast hits to 59 proteins in 12 species: Archae - 0; Bacteria - 0; Metazoa - 6; Fungi - 0; Plants - 53; Viruses - 0; Other Eukaryotes - 4 (source: NCBI BLink). | chr4:15490903-15493007 FORWARD LENGTH=253	1e-28	93.73	GO:0008150	biological process	GO:0003674	molecular function	GO:0005634 GO:0005737	nucleus; cytoplasm	NA	NA	NA	NA	NA	NA	NA	NA	NA	NA
Glyma06g06900	139	UniRef100_I1K8R7 Uncharacterized protein n=1 Tax=Glycine max RepID=I1K8R7_SOYBN	5e-97	99.28	NA	NA	NA	NA	NA	NA	NA	NA	NA	NA	NA	NA	NA	NA	NA	NA	NA	NA	NA	NA	NA	NA
Glyma06g06910	282	UniRef100_I1JUA1 Uncharacterized protein n=1 Tax=Glycine max RepID=I1JUA1_SOYBN	7e-26	52.13	UniRef100_G7KVX8 Tyrosyl-DNA phosphodiesterase n=1 Tax=Medicago truncatula RepID=G7KVX8_MEDTR	1e-14	52.13	NA	NA	NA	NA	NA	NA	NA	NA	NA	PF06087	Tyrosyl-DNA phosphodiesterase	NA	NA	NA	NA	NA	NA	NA	NA
Glyma06g06930	477	UniRef100_Q9ZTB2 Nodulin n=1 Tax=Glycine max RepID=Q9ZTB2_SOYBN	0	99.79	UniRef100_Q9ZTB2 Nodulin n=1 Tax=Glycine max RepID=Q9ZTB2_SOYBN	0	99.79	AT5G25250.1 | Symbols: | SPFH/Band 7/PHB domain-containing membrane-associated protein family | chr5:8749774-8751430 FORWARD LENGTH=470	0	98.74	GO:0006897 GO:0010324 GO:0071456	endocytosis; membrane invagination; cellular response to hypoxia	GO:0003674	molecular function	GO:0005768 GO:0005773 GO:0005774 GO:0005886 GO:0009506	endosome; vacuole; vacuolar membrane; plasma membrane; plasmodesma	PF01145	SPFH domain / Band 7 family	PTHR13806 PTHR13806:SF3	FLOTILLIN-RELATED; gb def: cog2268:uncharacterized bcr [corynebacterium glutamicum]	KOG2668	Flotillins	NA	NA	NA	NA
Glyma06g06940	546	UniRef100_I1K8S0 Uncharacterized protein n=1 Tax=Glycine max RepID=I1K8S0_SOYBN	0	99.82	UniRef100_Q25A63 H0306F03.12 protein n=3 Tax=Oryza sativa RepID=Q25A63_ORYSA	2e-166	84.8	AT2G25270.1 | Symbols: | unknown protein; LOCATED IN: plasma membrane; EXPRESSED IN: 18 plant structures; EXPRESSED DURING: 13 growth stages; BEST Arabidopsis thaliana protein match is: unknown protein (TAIR:AT2G12400.1); Has 35333 Blast hits to 34131 proteins in 2444 species: Archae - 798; Bacteria - 22429; Metazoa - 974; Fungi - 991; Plants - 531; Viruses - 0; Other Eukaryotes - 9610 (source: N…	0	84.62	GO:0031507 GO:0045787	heterochromatin assembly; positive regulation of cell cycle	NA	NA	GO:0005576 GO:0005886 GO:0009506	extracellular region; plasma membrane; plasmodesma	NA	NA	NA	NA	NA	NA	NA	NA	NA	NA
Glyma06g06960	465	UniRef100_UPI0002339FFC UPI0002339FFC related cluster n=1 Tax=unknown RepID=UPI0002339FFC	0	99.78	UniRef100_B9RP01 Calcium ion binding protein, putative n=1 Tax=Ricinus communis RepID=B9RP01_RICCO	0	97.85	AT4G32060.1 | Symbols: | calcium-binding EF hand family protein | chr4:15501134-15503321 FORWARD LENGTH=498	0	90.11	NA	NA	GO:0005509	calcium ion binding	GO:0005739	mitochondrion	PF00036	EF hand	PTHR12294 PTHR12294:SF1	EF HAND DOMAIN FAMILY A1,A2-RELATED; gb def: cg4704 gene product [drosophila melanogaster]	KOG2643	Ca2+_binding_protein,_contains_EF-hand_motifs	NA	NA	NA	NA
Glyma06g06980	1055	UniRef100_UPI0002339FFD UPI0002339FFD related cluster n=1 Tax=unknown RepID=UPI0002339FFD	0	99.91	UniRef100_G7II96 WD repeat-containing protein, putative n=1 Tax=Medicago truncatula RepID=G7II96_MEDTR	0	98.01	AT1G80490.1 | Symbols: TPR1 | TOPLESS-related 1 | chr1:30261094-30266446 REVERSE LENGTH=1119	0	98.01	GO:0010072	primary shoot apical meristem specification	GO:0005515	protein binding	GO:0005634 GO:0005829	nucleus; cytosol	PF00400 PF08513	WD domain, G-beta repeat; LisH	PTHR22847 PTHR22847:SF52	WD40 REPEAT PROTEIN; SUBFAMILY NOT NAMED	KOG0266	WD40_repeat-containing_protein	NA	NA	NA	NA
Glyma06g06990	562	UniRef100_I1K8S4 Uncharacterized protein n=1 Tax=Glycine max RepID=I1K8S4_SOYBN	0	99.82	UniRef100_G7JAF7 Cysteinyl tRNA synthetase n=1 Tax=Medicago truncatula RepID=G7JAF7_MEDTR	0	99.47	AT2G31170.1 | Symbols: SYCO ARATH | Cysteinyl-tRNA synthetase, class Ia family protein | chr2:13282559-13285616 REVERSE LENGTH=563	0	99.29	GO:0006418 GO:0006423 GO:0009658 GO:0010197 GO:0042407 GO:0043067 GO:0048481	tRNA aminoacylation for protein translation; cysteinyl-tRNA aminoacylation; chloroplast organization; polar nucleus fusion; cristae formation; regulation of programmed cell death; ovule development	GO:0000166 GO:0004812 GO:0004817 GO:0005524	nucleotide binding; aminoacyl-tRNA ligase activity; cysteine-tRNA ligase activity; ATP binding	GO:0005737 GO:0005739 GO:0005829 GO:0009507 GO:0009570	cytoplasm; mitochondrion; cytosol; chloroplast; chloroplast stroma	PF01406	tRNA synthetases class I (C) catalytic domain	PTHR10890	CYSTEINYL-TRNA SYNTHETASE	KOG2007	Cysteinyl-tRNA_synthetase	6.1.1.16	Cysteine--tRNA_ligase	K01883	cysteinyl-tRNA_synthetase_[EC:6.1.1.16]
Glyma06g07000	210	UniRef100_I1K8S5 Uncharacterized protein n=1 Tax=Glycine max RepID=I1K8S5_SOYBN	3e-151	99.52	UniRef100_Q8VY97 ER membrane protein complex subunit 7 homolog n=1 Tax=Arabidopsis thaliana RepID=Y4213_ARATH	2e-81	84.29	AT2G25310.1 | Symbols: | Protein of unknown function (DUF2012) | chr2:10777436-10779123 REVERSE LENGTH=210	1e-91	94.29	GO:0008150	biological process	GO:0030246	carbohydrate binding	GO:0005783 GO:0009507	endoplasmic reticulum; chloroplast	PF09430	Protein of unknown function (DUF2012)	PTHR13605	UNCHARACTERIZED	KOG3306	Predicted_membrane_protein	NA	NA	NA	NA
Glyma06g07010	394	UniRef100_I1K8S9 Uncharacterized protein n=1 Tax=Glycine max RepID=I1K8S9_SOYBN	0	99.75	UniRef100_O49378 AT4g32140/F10N7_50 n=1 Tax=Arabidopsis thaliana RepID=O49378_ARATH	0	99.75	AT4G32140.1 | Symbols: | EamA-like transporter family | chr4:15523037-15525195 REVERSE LENGTH=394	0	99.75	GO:0008150	biological process	GO:0003674	molecular function	GO:0016020	membrane	PF00892	EamA-like transporter family	PTHR23051	SOLUTE CARRIER FAMILY 35, MEMBER F5	KOG2765	Predicted_membrane_protein	NA	NA	NA	NA
Glyma06g07030	560	UniRef100_UPI0002339FFE UPI0002339FFE related cluster n=1 Tax=unknown RepID=UPI0002339FFE	0	99.82	UniRef100_G7JAG6 Synaptotagmin-1 n=1 Tax=Medicago truncatula RepID=G7JAG6_MEDTR	0	99.82	AT5G11100.1 | Symbols: SYTD, ATSYTD, NTMC2TYPE2.2, NTMC2T2.2, SYT4 | Calcium-dependent lipid-binding (CaLB domain) family protein | chr5:3532402-3535221 FORWARD LENGTH=569	0	99.64	GO:0008150 GO:0009887 GO:0009888 GO:0010638 GO:0016126 GO:0019745 GO:0033044	biological process; organ morphogenesis; tissue development; positive regulation of organelle organization; sterol biosynthetic process; pentacyclic triterpenoid biosynthetic process; regulation of chromosome organization	GO:0003674	molecular function	GO:0005886	plasma membrane	PF00168	C2 domain	PTHR10774 PTHR10774:SF23	CALCIUM-DEPENDENT LIPID-BINDING PROTEIN (CALB RELATED); SUBFAMILY NOT NAMED	NA	NA	NA	NA	NA	NA
Glyma06g07040	475	UniRef100_I1K8T1 Uncharacterized protein n=1 Tax=Glycine max RepID=I1K8T1_SOYBN	0	70.74	UniRef100_B9RP20 Catalytic, putative n=1 Tax=Ricinus communis RepID=B9RP20_RICCO	0	96.63	AT5G25310.1 | Symbols: | Exostosin family protein | chr5:8784820-8787235 FORWARD LENGTH=480	5e-177	93.47	NA	NA	GO:0003824	catalytic activity	GO:0005794 GO:0016020	Golgi apparatus; membrane	PF03016	Exostosin family	PTHR11062 PTHR11062:SF1	EXOSTOSIN (HEPARAN SULFATE GLYCOSYLTRANSFERASE)-RELATED; EXOSTOSIN RELATED	KOG1021	Acetylglucosaminyltransferase_EXT1/exostosin_1	NA	NA	NA	NA
Glyma06g07050	1680	UniRef100_I1K8T2 Uncharacterized protein n=1 Tax=Glycine max RepID=I1K8T2_SOYBN	0	99.94	UniRef100_G7JAH0 CGS1 mRNA stability n=1 Tax=Medicago truncatula RepID=G7JAH0_MEDTR	0	97.98	AT2G25320.1 | Symbols: | TRAF-like family protein | chr2:10781951-10788065 REVERSE LENGTH=1673	0	98.15	NA	NA	NA	NA	GO:0009507	chloroplast	PF00917	MATH domain	PTHR24007 PTHR24007:SF24	FAMILY NOT NAMED;	KOG1987	Speckle-type_POZ_protein_SPOP_and_related_proteins_with_TRAF,_MATH_and_BTB/POZ_domains	NA	NA	NA	NA
Glyma06g07070	222	UniRef100_I1K8T4 Uncharacterized protein n=1 Tax=Glycine max RepID=I1K8T4_SOYBN	2e-131	99.55	UniRef100_G7I719 14 kDa proline-rich protein DC2.15 n=1 Tax=Medicago truncatula RepID=G7I719_MEDTR	5e-45	98.65	AT2G45180.1 | Symbols: | Bifunctional inhibitor/lipid-transfer protein/seed storage 2S albumin superfamily protein | chr2:18626377-18626781 FORWARD LENGTH=134	5e-37	37.39	GO:0000038 GO:0006869 GO:0042335	very long-chain fatty acid metabolic process; lipid transport; cuticle development	GO:0008289	lipid binding	GO:0005576 GO:0009535	extracellular region; chloroplast thylakoid membrane	PF00234	Protease inhibitor/seed storage/LTP family	NA	NA	NA	NA	NA	NA	NA	NA
Glyma06g07080	722	UniRef100_UPI000233A000 UPI000233A000 related cluster n=1 Tax=unknown RepID=UPI000233A000	0	99.86	UniRef100_F4JTJ2 Phox (PX) domain-containing protein n=1 Tax=Arabidopsis thaliana RepID=F4JTJ2_ARATH	0	98.48	AT4G32160.1 | Symbols: | Phox (PX) domain-containing protein | chr4:15529056-15532892 FORWARD LENGTH=723	0	98.48	GO:0007154 GO:0007165	cell communication; signal transduction	GO:0035091	phosphatidylinositol binding	GO:0005576	extracellular region	PF00787	PX domain	PTHR10555 PTHR10555:SF65	SORTING NEXIN; PHOX (PX) DOMAIN-CONTAINING PROTEIN	NA	NA	NA	NA	NA	NA
Glyma06g07090	194	UniRef100_C6TIA4 Putative uncharacterized protein n=1 Tax=Glycine max RepID=C6TIA4_SOYBN	1e-134	99.48	UniRef100_G7JAH8 Adenine phosphoribosyltransferase n=1 Tax=Medicago truncatula RepID=G7JAH8_MEDTR	1e-115	97.42	AT5G11160.1 | Symbols: APT5 | adenine phosphoribosyltransferase 5 | chr5:3550774-3551986 FORWARD LENGTH=191	1e-102	97.42	GO:0006168 GO:0009061 GO:0009116 GO:0009117	adenine salvage; anaerobic respiration; nucleoside metabolic process; nucleotide metabolic process	GO:0003999	adenine phosphoribosyltransferase activity	GO:0005737	cytoplasm	PF00156	Phosphoribosyl transferase domain	PTHR11776	PHOSPHORIBOSYLTRANSFERASE	KOG1712	Adenine_phosphoribosyl_transferases	2.4.2.7	Adenine_phosphoribosyltransferase	K00759	adenine_phosphoribosyltransferase_[EC:2.4.2.7]
Glyma06g07110	625	UniRef100_I1K8T6 Uncharacterized protein n=1 Tax=Glycine max RepID=I1K8T6_SOYBN	0	99.84	UniRef100_G7I717 G protein-coupled receptor kinase n=1 Tax=Medicago truncatula RepID=G7I717_MEDTR	0	98.72	AT4G32250.3 | Symbols: | Protein kinase superfamily protein | chr4:15570285-15572528 REVERSE LENGTH=611	0	92	GO:0006468 GO:0010260	protein phosphorylation; organ senescence	GO:0004672 GO:0005524 GO:0016301 GO:0016772	protein kinase activity; ATP binding; kinase activity; transferase activity, transferring phosphorus-containing groups	GO:0005737 GO:0009507 GO:0009536	cytoplasm; chloroplast; plastid	PF07714 PF00069	Protein tyrosine kinase; Protein kinase domain	PTHR22967 PTHR22967:SF2	SERINE/THREONINE PROTEIN KINASE; PROTEIN KINASE	KOG0198	MEKK_and_related_serine/threonine_protein_kinases	NA	NA	NA	NA
Glyma06g07120	348	UniRef100_UPI000233A7E4 UPI000233A7E4 related cluster n=1 Tax=unknown RepID=UPI000233A7E4	0	99.71	UniRef100_G7I713 UDP-N-acetylglucosamine/UDP-glucose/GDP-mannose transporter n=1 Tax=Medicago truncatula RepID=G7I713_MEDTR	0	99.71	AT4G32272.1 | Symbols: | Nucleotide/sugar transporter family protein | chr4:15577195-15579689 REVERSE LENGTH=344	2e-163	97.13	NA	NA	NA	NA	NA	NA	PF08449 PF03151	UAA transporter family; Triose-phosphate Transporter family	PTHR11132	SOLUTE CARRIER FAMILY 35	KOG1444	Nucleotide-sugar_transporter_VRG4/SQV-7	NA	NA	NA	NA
Glyma06g07130	228	UniRef100_I1K8U1 Uncharacterized protein n=1 Tax=Glycine max RepID=I1K8U1_SOYBN	3e-165	99.56	UniRef100_G7JAI5 Auxin-responsive protein IAA10 n=1 Tax=Medicago truncatula RepID=G7JAI5_MEDTR	3e-86	99.56	AT4G32280.1 | Symbols: IAA29 | indole-3-acetic acid inducible 29 | chr4:15583479-15584628 FORWARD LENGTH=251	2e-32	97.37	GO:0006355 GO:0009733 GO:0010114 GO:0010218 GO:0010583	regulation of transcription, DNA-dependent; response to auxin stimulus; response to red light; response to far red light; response to cyclopentenone	GO:0003700 GO:0046983	sequence-specific DNA binding transcription factor activity; protein dimerization activity	GO:0005634	nucleus	PF02309	AUX/IAA family	NA	NA	NA	NA	NA	NA	NA	NA
Glyma06g07140	642	UniRef100_I1K8U2 Uncharacterized protein n=1 Tax=Glycine max RepID=I1K8U2_SOYBN	0	99.84	UniRef100_G7JAJ0 Epsin N-terminal homology (ENTH) domain-containing protein n=1 Tax=Medicago truncatula RepID=G7JAJ0_MEDTR	0	98.91	AT2G25430.1 | Symbols: | epsin N-terminal homology (ENTH) domain-containing protein / clathrin assembly protein-related | chr2:10822716-10824677 FORWARD LENGTH=653	0	99.84	GO:0048268	clathrin coat assembly	GO:0005543 GO:0005545 GO:0030276	phospholipid binding; 1-phosphatidylinositol binding; clathrin binding	GO:0005634 GO:0005886 GO:0030118	nucleus; plasma membrane; clathrin coat	PF07651	ANTH domain	PTHR22951 PTHR22951:SF1	CLATHRIN ASSEMBLY PROTEIN; CLATHRIN ASSEMBLY PROTEIN	KOG0251	Clathrin_assembly_protein_AP180_and_related_proteins,_contain_ENTH_domain	NA	NA	NA	NA
Glyma06g07160	623	UniRef100_UPI000233A003 UPI000233A003 related cluster n=1 Tax=unknown RepID=UPI000233A003	0	99.84	UniRef100_G7JB14 SYNC1 protein n=1 Tax=Medicago truncatula RepID=G7JB14_MEDTR	0	97.43	AT3G11760.1 | Symbols: | unknown protein; FUNCTIONS IN: molecular_function unknown; INVOLVED IN: biological_process unknown; LOCATED IN: cellular_component unknown; EXPRESSED IN: 23 plant structures; EXPRESSED DURING: 14 growth stages; BEST Arabidopsis thaliana protein match is: unknown protein (TAIR:AT5G04860.1); Has 84 Blast hits to 73 proteins in 13 species: Archae - 0; Bacteria - 0; Metazoa -…	2e-91	43.18	GO:0008150	biological process	GO:0003674	molecular function	GO:0005634	nucleus	NA	NA	NA	NA	NA	NA	NA	NA	NA	NA
Glyma06g07170	818	UniRef100_UPI000233A004 UPI000233A004 related cluster n=1 Tax=unknown RepID=UPI000233A004	0	99.88	UniRef100_G7JB13 Kinase-like protein n=1 Tax=Medicago truncatula RepID=G7JB13_MEDTR	0	97.92	AT4G32300.1 | Symbols: SD2-5 | S-domain-2 5 | chr4:15599970-15602435 FORWARD LENGTH=821	0	99.14	GO:0006468 GO:0046777	protein phosphorylation; protein autophosphorylation	GO:0004672 GO:0004674 GO:0005524 GO:0016301 GO:0016772 GO:0030246 GO:0031625	protein kinase activity; protein serine/threonine kinase activity; ATP binding; kinase activity; transferase activity, transferring phosphorus-containing groups; carbohydrate binding; ubiquitin protein ligase binding	GO:0005886	plasma membrane	PF00069 PF01453	Protein kinase domain; D-mannose binding lectin	PTHR24420 PTHR24420:SF926	FAMILY NOT NAMED;	KOG1187	Serine/threonine_protein_kinase	NA	NA	NA	NA
Glyma06g07180	348	UniRef100_UPI000233A2BF UPI000233A2BF related cluster n=1 Tax=unknown RepID=UPI000233A2BF	0	99.71	UniRef100_B9RP42 L-ascorbate peroxidase 1, cytosolic, putative n=1 Tax=Ricinus communis RepID=B9RP42_RICCO	6e-128	93.1	AT4G32320.1 | Symbols: APX6 | ascorbate peroxidase 6 | chr4:15602777-15605234 FORWARD LENGTH=329	6e-124	84.2	GO:0006979 GO:0055114	response to oxidative stress; oxidation-reduction process	GO:0004601 GO:0016688 GO:0020037	peroxidase activity; L-ascorbate peroxidase activity; heme binding	GO:0005576 GO:0005829	extracellular region; cytosol	PF00141	Peroxidase	NA	NA	NA	NA	1.11.1.11	L-ascorbate_peroxidase	K00434	L-ascorbate_peroxidase_[EC:1.11.1.11]
Glyma06g07190	462	UniRef100_I1K8U7 Uncharacterized protein n=1 Tax=Glycine max RepID=I1K8U7_SOYBN	0	99.78	UniRef100_G7JB10 BRI1-KD interacting protein 118-like protein n=2 Tax=Medicago truncatula RepID=G7JB10_MEDTR	3e-162	99.13	AT4G32330.2 | Symbols: | TPX2 (targeting protein for Xklp2) protein family | chr4:15609801-15611867 FORWARD LENGTH=436	5e-79	80.74	GO:0000023 GO:0008150 GO:0009736 GO:0019252 GO:0043085	maltose metabolic process; biological process; cytokinin mediated signaling pathway; starch biosynthetic process; positive regulation of catalytic activity	GO:0003674	molecular function	GO:0005634	nucleus	PF06886	Targeting protein for Xklp2 (TPX2)	NA	NA	NA	NA	NA	NA	NA	NA
Glyma06g07200	639	UniRef100_I1K8U8 Uncharacterized protein n=1 Tax=Glycine max RepID=I1K8U8_SOYBN	0	99.84	UniRef100_O22512 Grr1 n=1 Tax=Glycine max RepID=O22512_SOYBN	0	92.33	AT2G25490.1 | Symbols: EBF1, FBL6 | EIN3-binding F box protein 1 | chr2:10848018-10850275 REVERSE LENGTH=628	0	99.69	GO:0006511 GO:0009723 GO:0010105 GO:0042752	ubiquitin-dependent protein catabolic process; response to ethylene stimulus; negative regulation of ethylene mediated signaling pathway; regulation of circadian rhythm	GO:0004842 GO:0005515	ubiquitin-protein ligase activity; protein binding	GO:0005634	nucleus	PF00646	F-box domain	PTHR23125 PTHR23125:SF106	F-BOX/LEUCINE RICH REPEAT PROTEIN; EBF1 (EIN3-BINDING F BOX PROTEIN 1), UBIQUITIN-PRO	KOG1947	Leucine_rich_repeat_proteins,_some_proteins_contain_F-box	NA	NA	NA	NA
Glyma06g07210	156	UniRef100_C6SXW8 Uncharacterized protein n=1 Tax=Glycine max RepID=C6SXW8_SOYBN	2e-111	99.36	UniRef100_B9DGF6 AT3G15770 protein n=2 Tax=Arabidopsis thaliana RepID=B9DGF6_ARATH	2e-35	74.36	AT5G25360.2 | Symbols: | unknown protein; FUNCTIONS IN: molecular_function unknown; INVOLVED IN: biological_process unknown; LOCATED IN: cellular_component unknown; EXPRESSED IN: 23 plant structures; EXPRESSED DURING: 15 growth stages; BEST Arabidopsis thaliana protein match is: unknown protein (TAIR:AT4G32342.1). | chr5:8799934-8802333 REVERSE LENGTH=169	2e-46	99.36	GO:0008150	biological process	GO:0003674	molecular function	NA	NA	NA	NA	NA	NA	NA	NA	NA	NA	NA	NA
Glyma06g07220	827	UniRef100_I1K8V2 Phospholipase D n=2 Tax=Glycine max RepID=I1K8V2_SOYBN	0	80.53	UniRef100_I1K8V2 Phospholipase D n=2 Tax=Glycine max RepID=I1K8V2_SOYBN	0	80.53	AT3G15730.1 | Symbols: PLDALPHA1, PLD | phospholipase D alpha 1 | chr3:5330835-5333474 FORWARD LENGTH=810	0	99.64	GO:0006094 GO:0006096 GO:0006631 GO:0006833 GO:0006972 GO:0007030 GO:0009266 GO:0009651 GO:0009737 GO:0009789 GO:0009845 GO:0010119 GO:0046686 GO:0048767	gluconeogenesis; glycolysis; fatty acid metabolic process; water transport; hyperosmotic response; Golgi organization; response to temperature stimulus; response to salt stress; response to abscisic acid stimulus; positive regulation of abscisic acid mediated signaling pathway; seed germination; regulation of stomatal movement; response to cadmium ion; root hair elongation	GO:0003824 GO:0004630 GO:0005509 GO:0005515 GO:0005546	catalytic activity; phospholipase D activity; calcium ion binding; protein binding; phosphatidylinositol-4,5-bisphosphate binding	GO:0005634 GO:0005739 GO:0005829 GO:0005886 GO:0009506 GO:0009507 GO:0016020 GO:0030136	nucleus; mitochondrion; cytosol; plasma membrane; plasmodesma; chloroplast; membrane; clathrin-coated vesicle	PF12357 PF00168 PF00614	Phospholipase D C terminal; C2 domain; Phospholipase D Active site motif	PTHR18896 PTHR18896:SF11	PHOSPHOLIPASE D; PHOPHOLIPASE D ALPHA	KOG1329	Phospholipase_D1	NA	NA	NA	NA
Glyma06g07230	822	UniRef100_I1K8V3 Phospholipase D (Fragment) n=2 Tax=Glycine max RepID=I1K8V3_SOYBN	0	93.55	UniRef100_I1K8V3 Phospholipase D (Fragment) n=2 Tax=Glycine max RepID=I1K8V3_SOYBN	0	93.55	AT3G15730.1 | Symbols: PLDALPHA1, PLD | phospholipase D alpha 1 | chr3:5330835-5333474 FORWARD LENGTH=810	0	99.64	GO:0006094 GO:0006096 GO:0006631 GO:0006833 GO:0006972 GO:0007030 GO:0009266 GO:0009651 GO:0009737 GO:0009789 GO:0009845 GO:0010119 GO:0046686 GO:0048767	gluconeogenesis; glycolysis; fatty acid metabolic process; water transport; hyperosmotic response; Golgi organization; response to temperature stimulus; response to salt stress; response to abscisic acid stimulus; positive regulation of abscisic acid mediated signaling pathway; seed germination; regulation of stomatal movement; response to cadmium ion; root hair elongation	GO:0003824 GO:0004630 GO:0005509 GO:0005515 GO:0005546	catalytic activity; phospholipase D activity; calcium ion binding; protein binding; phosphatidylinositol-4,5-bisphosphate binding	GO:0005634 GO:0005739 GO:0005829 GO:0005886 GO:0009506 GO:0009507 GO:0016020 GO:0030136	nucleus; mitochondrion; cytosol; plasma membrane; plasmodesma; chloroplast; membrane; clathrin-coated vesicle	PF12357 PF00168 PF00614	Phospholipase D C terminal; C2 domain; Phospholipase D Active site motif	PTHR18896 PTHR18896:SF11	PHOSPHOLIPASE D; PHOPHOLIPASE D ALPHA	KOG1329	Phospholipase_D1	NA	NA	NA	NA
Glyma06g07240	186	UniRef100_I1K8V5 Uncharacterized protein n=1 Tax=Glycine max RepID=I1K8V5_SOYBN	2e-134	99.46	UniRef100_G7JB31 Ethylene-responsive transcription factor SHINE n=1 Tax=Medicago truncatula RepID=G7JB31_MEDTR	2e-81	98.39	AT5G25390.2 | Symbols: SHN2 | Integrase-type DNA-binding superfamily protein | chr5:8820637-8821741 FORWARD LENGTH=189	1e-75	98.92	GO:0006355	regulation of transcription, DNA-dependent	GO:0003677 GO:0003700	DNA binding; sequence-specific DNA binding transcription factor activity	GO:0005634	nucleus	PF00847	AP2 domain;	NA	NA	NA	NA	NA	NA	NA	NA
Glyma06g07260	251	UniRef100_I1K8V7 Uncharacterized protein n=2 Tax=Glycine max RepID=I1K8V7_SOYBN	0	99.6	UniRef100_G7I700 Vacuolar transporter chaperone n=1 Tax=Medicago truncatula RepID=G7I700_MEDTR	1e-121	99.6	AT2G26660.1 | Symbols: ATSPX2, SPX2 | SPX domain gene 2 | chr2:11338932-11340703 FORWARD LENGTH=287	7e-85	98.8	GO:0006817 GO:0016036 GO:0019375 GO:0045892	phosphate ion transport; cellular response to phosphate starvation; galactolipid biosynthetic process; negative regulation of transcription, DNA-dependent	GO:0003674	molecular function	GO:0005634	nucleus	PF03105	SPX domain	PTHR10783 PTHR10783:SF5	XENOTROPIC AND POLYTROPIC MURINE LEUKEMIA VIRUS RECEPTOR; XENOTROPIC AND POLYTROPIC MURINE LEUKEMIA VIRUS RECEPTOR IDS-4	KOG1161	Protein_involved_in_vacuolar_polyphosphate_accumulation,_contains_SPX_domain	NA	NA	NA	NA
Glyma06g07270	133	UniRef100_I1K8V8 Uncharacterized protein n=1 Tax=Glycine max RepID=I1K8V8_SOYBN	1e-92	99.25	UniRef100_D7LRE2 Bundle-sheath defective protein 2 family n=1 Tax=Arabidopsis lyrata subsp. lyrata RepID=D7LRE2_ARALL	4e-36	97.74	AT3G47650.1 | Symbols: | DnaJ/Hsp40 cysteine-rich domain superfamily protein | chr3:17569576-17570262 FORWARD LENGTH=136	3e-37	97.74	GO:0006098 GO:0006364 GO:0009657 GO:0009773 GO:0010207 GO:0019288	pentose-phosphate shunt; rRNA processing; plastid organization; photosynthetic electron transport in photosystem I; photosystem II assembly; isopentenyl diphosphate biosynthetic process, mevalonate-independent pathway	GO:0031072 GO:0051082	heat shock protein binding; unfolded protein binding	GO:0009507	chloroplast	NA	NA	NA	NA	NA	NA	NA	NA	NA	NA
Glyma06g07280	428	UniRef100_UPI0001B8373A UPI0001B8373A related cluster n=1 Tax=unknown RepID=UPI0001B8373A	0	99.77	UniRef100_G7JB35 DEAD-box ATP-dependent RNA helicase n=1 Tax=Medicago truncatula RepID=G7JB35_MEDTR	0	99.77	AT5G11170.1 | Symbols: | DEAD/DEAH box RNA helicase family protein _x0001_| chr5:3553334-3556646 FORWARD LENGTH=427	0	99.77	GO:0046686	response to cadmium ion	GO:0003676 GO:0004386 GO:0005524 GO:0008026	nucleic acid binding; helicase activity; ATP binding; ATP-dependent helicase activity	GO:0005634 GO:0005730 GO:0009506	nucleus; nucleolus; plasmodesma	PF00271 PF00270	Helicase conserved C-terminal domain; DEAD/DEAH box helicase	PTHR24031 PTHR24031:SF5	FAMILY NOT NAMED; SUBFAMILY NOT NAMED	KOG0329	ATP-dependent_RNA_helicase	NA	NA	NA	NA
Glyma06g07290	347	UniRef100_I1K8W1 Uncharacterized protein n=1 Tax=Glycine max RepID=I1K8W1_SOYBN	0	99.71	UniRef100_G7JB38 Plastidic phosphate translocator-like protein1 n=1 Tax=Medicago truncatula RepID=G7JB38_MEDTR	0	99.71	AT2G25520.1 | Symbols: | Drug/metabolite transporter superfamily protein | chr2:10860950-10861993 FORWARD LENGTH=347	0	99.71	GO:0006863	purine nucleobase transport	GO:0008514	organic anion transmembrane transporter activity	GO:0005768 GO:0005794 GO:0005802 GO:0005886 GO:0016020	endosome; Golgi apparatus; trans-Golgi network; plasma membrane; membrane	PF03151	Triose-phosphate Transporter family	PTHR11132	SOLUTE CARRIER FAMILY 35	KOG1441	Glucose-6-phosphate/phosphate_and_phosphoenolpyruvate/phosphate_antiporter	NA	NA	NA	NA
Glyma06g07310	392	UniRef100_I1K8W3 Uncharacterized protein n=1 Tax=Glycine max RepID=I1K8W3_SOYBN	0	99.74	UniRef100_G7JB41 Protein brittle-1 n=1 Tax=Medicago truncatula RepID=G7JB41_MEDTR	0	99.74	AT4G32400.1 | Symbols: EMB104, SHS1, EMB42, ATBT1 | Mitochondrial substrate carrier family protein | chr4:15638686-15640238 FORWARD LENGTH=392	0	99.49	GO:0006612 GO:0006810 GO:0006820 GO:0006839 GO:0006862 GO:0006888 GO:0006944 GO:0009165 GO:0009793 GO:0010363 GO:0015696 GO:0015802 GO:0043069 GO:0043090 GO:0043269 GO:0055085	protein targeting to membrane; transport; anion transport; mitochondrial transport; nucleotide transport; ER to Golgi vesicle-mediated transport; cellular membrane fusion; nucleotide biosynthetic process; embryo development ending in seed dormancy; regulation of plant-type hypersensitive response; ammonium transport; basic amino acid transport; negative regulation of programmed cell death; amino …	GO:0005215 GO:0015215	transporter activity; nucleotide transmembrane transporter activity	GO:0005739 GO:0005743 GO:0009507 GO:0009536 GO:0009941	mitochondrion; mitochondrial inner membrane; chloroplast; plastid; chloroplast envelope	PF00153	Mitochondrial carrier protein	PTHR24089 PTHR24089:SF87	FAMILY NOT NAMED; SUBFAMILY NOT NAMED	KOG0752	Mitochondrial_solute_carrier_protein	NA	NA	NA	NA
Glyma06g07320	1085	UniRef100_I1K8W4 Uncharacterized protein n=2 Tax=Glycine max RepID=I1K8W4_SOYBN	0	99.91	UniRef100_Q6DUJ3 CesA1 n=1 Tax=Acacia mangium RepID=Q6DUJ3_ACAMN	0	99.91	AT4G32410.1 | Symbols: CESA1, RSW1, AtCESA1 | cellulose synthase 1 | chr4:15641009-15646388 REVERSE LENGTH=1081	0	99.63	GO:0000902 GO:0006096 GO:0006816 GO:0006833 GO:0006972 GO:0007030 GO:0009266 GO:0009651 GO:0009664 GO:0009750 GO:0009832 GO:0009833 GO:0016049 GO:0030243 GO:0030244 GO:0042538 GO:0046686 GO:0048193 GO:0048767	cell morphogenesis; glycolysis; calcium ion transport; water transport; hyperosmotic response; Golgi organization; response to temperature stimulus; response to salt stress; plant-type cell wall organization; response to fructose stimulus; plant-type cell wall biogenesis; primary cell wall biogenesis; cell growth; cellulose metabolic process; cellulose biosynthetic process; hyperosmotic salinity …	GO:0008270 GO:0016757 GO:0016759 GO:0016760	zinc ion binding; transferase activity, transferring glycosyl groups; cellulose synthase activity; cellulose synthase (UDP-forming) activity	GO:0005768 GO:0005794 GO:0005802 GO:0005886	endosome; Golgi apparatus; trans-Golgi network; plasma membrane	PF03552	Cellulose synthase	PTHR13301 PTHR13301:SF21	X-BOX TRANSCRIPTION FACTOR-RELATED; CELLULOSE SYNTHASE-RELATED	NA	NA	2.4.1.12	Cellulose_synthase_(UDP-forming)	K10999	cellulose_synthase_A_[EC:2.4.1.12]
Glyma06g07330	339	UniRef100_I1K8W6 Uncharacterized protein n=1 Tax=Glycine max RepID=I1K8W6_SOYBN	0	99.71	UniRef100_C1MM68 Ocp3-like homeobox transcription factor n=1 Tax=Micromonas pusilla CCMP1545 RepID=C1MM68_MICPC	2e-06	42.77	AT5G11270.1 | Symbols: OCP3 | overexpressor of cationic peroxidase 3 | chr5:3595557-3597076 REVERSE LENGTH=354	8e-69	50.74	GO:0006355 GO:0006952 GO:0009414 GO:0009737 GO:0009867 GO:0010118 GO:0050832	regulation of transcription, DNA-dependent; defense response; response to water deprivation; response to abscisic acid stimulus; jasmonic acid mediated signaling pathway; stomatal movement; defense response to fungus	GO:0003700 GO:0043565	sequence-specific DNA binding transcription factor activity; sequence-specific DNA binding	GO:0005634 GO:0009507	nucleus; chloroplast	PF00046	Homeobox domain	NA	NA	NA	NA	NA	NA	NA	NA
Glyma06g07340	229	UniRef100_I1K8W7 Uncharacterized protein n=1 Tax=Glycine max RepID=I1K8W7_SOYBN	2e-163	99.56	NA	NA	NA	AT5G11280.1 | Symbols: | unknown protein; BEST Arabidopsis thaliana protein match is: unknown protein (TAIR:AT1G80200.1); Has 30201 Blast hits to 17322 proteins in 780 species: Archae - 12; Bacteria - 1396; Metazoa - 17338; Fungi - 3422; Plants - 5037; Viruses - 0; Other Eukaryotes - 2996 (source: NCBI BLink). | chr5:3597321-3598347 FORWARD LENGTH=209	4e-115	91.27	GO:0008150	biological process	GO:0003674	molecular function	GO:0009507	chloroplast	NA	NA	NA	NA	NA	NA	NA	NA	NA	NA
Glyma06g07350	164	UniRef100_I1K8W8 Uncharacterized protein n=1 Tax=Glycine max RepID=I1K8W8_SOYBN	8e-111	99.39	UniRef100_G7JB51 Zinc finger protein-like protein n=1 Tax=Medicago truncatula RepID=G7JB51_MEDTR	6e-74	99.39	AT3G15680.1 | Symbols: | Ran BP2/NZF zinc finger-like superfamily protein | chr3:5315437-5316048 FORWARD LENGTH=164	2e-62	96.95	GO:0008150 GO:0009664 GO:0042545	biological process; plant-type cell wall organization; cell wall modification	GO:0008270	zinc ion binding	GO:0005622	intracellular	PF00641	Zn-finger in Ran binding protein and others	PTHR23111	ZINC FINGER PROTEIN	NA	NA	NA	NA	NA	NA
Glyma06g07360	259	UniRef100_I1K8X0 Uncharacterized protein n=1 Tax=Glycine max RepID=I1K8X0_SOYBN	0	99.61	UniRef100_G7JB53 Acyl-protein thioesterase n=1 Tax=Medicago truncatula RepID=G7JB53_MEDTR	1e-159	93.44	AT5G20060.3 | Symbols: | alpha/beta-Hydrolases superfamily protein | chr5:6776800-6779447 FORWARD LENGTH=252	4e-128	98.07	NA	NA	GO:0004091 GO:0016787	carboxylesterase activity; hydrolase activity	GO:0005737	cytoplasm	PF02230	Phospholipase/Carboxylesterase	PTHR10655 PTHR10655:SF5	LYSOPHOSPHOLIPASE-RELATED; CARBOXYLESTERASE	KOG2112	Lysophospholipase	NA	NA	NA	NA
Glyma06g07380	851	UniRef100_UPI000233A447 UPI000233A447 related cluster n=1 Tax=unknown RepID=UPI000233A447	0	99.88	UniRef100_G7JB56 Peptidyl-prolyl cis-trans isomerase n=1 Tax=Medicago truncatula RepID=G7JB56_MEDTR	2e-122	64.39	AT4G32420.4 | Symbols: | Cyclophilin-like peptidyl-prolyl cis-trans isomerase family protein | chr4:15647550-15652103 REVERSE LENGTH=820	5e-110	60.16	GO:0000398 GO:0006457	mRNA splicing, via spliceosome; protein folding	GO:0003755	peptidyl-prolyl cis-trans isomerase activity	GO:0005634	nucleus	PF00160	Cyclophilin type peptidyl-prolyl cis-trans isomerase/CLD	PTHR11071 PTHR11071:SF43	CYCLOPHILIN; PEPTIDYL-PROLYL CIS-TRANS ISOMERASE (CYCLOPHILIN)	KOG0546	HSP90_co-chaperone_CPR7/Cyclophilin	NA	NA	NA	NA
Glyma06g07400	222	UniRef100_I1K8X7 Uncharacterized protein n=1 Tax=Glycine max RepID=I1K8X7_SOYBN	8e-165	99.55	UniRef100_Q8H156 GTP-binding nuclear protein Ran-3 n=1 Tax=Arabidopsis thaliana RepID=RAN3_ARATH	4e-163	99.55	AT5G55190.1 | Symbols: RAN3, ATRAN3 | RAN GTPase 3 | chr5:22392285-22393957 FORWARD LENGTH=221	8e-166	99.55	GO:0006184 GO:0006406 GO:0006606 GO:0006886 GO:0006913 GO:0007165 GO:0007264	GTP catabolic process; mRNA export from nucleus; protein import into nucleus; intracellular protein transport; nucleocytoplasmic transport; signal transduction; small GTPase mediated signal transduction	GO:0003924 GO:0005515 GO:0005525	GTPase activity; protein binding; GTP binding	GO:0005634 GO:0005794 GO:0009506	nucleus; Golgi apparatus; plasmodesma	PF00071	Ras family	PTHR24071	FAMILY NOT NAMED	KOG0096	GTPase_Ran/TC4/GSP1_(nuclear_protein_transport_pathway),_small_G_protein_superfamily	NA	NA	K07936	GTP-binding_nuclear_protein_Ran
Glyma06g07410	222	UniRef100_UPI00019AA8A0 UPI00019AA8A0 related cluster n=1 Tax=unknown RepID=UPI00019AA8A0	5e-165	99.55	UniRef100_Q8S2Z7 GTP-binding protein n=1 Tax=Helianthus annuus RepID=Q8S2Z7_HELAN	7e-163	99.55	AT5G55190.1 | Symbols: RAN3, ATRAN3 | RAN GTPase 3 | chr5:22392285-22393957 FORWARD LENGTH=221	9e-165	99.55	GO:0006184 GO:0006406 GO:0006606 GO:0006886 GO:0006913 GO:0007165 GO:0007264	GTP catabolic process; mRNA export from nucleus; protein import into nucleus; intracellular protein transport; nucleocytoplasmic transport; signal transduction; small GTPase mediated signal transduction	GO:0003924 GO:0005515 GO:0005525	GTPase activity; protein binding; GTP binding	GO:0005634 GO:0005794 GO:0009506	nucleus; Golgi apparatus; plasmodesma	PF00071	Ras family	PTHR24071	FAMILY NOT NAMED	KOG0096	GTPase_Ran/TC4/GSP1_(nuclear_protein_transport_pathway),_small_G_protein_superfamily	NA	NA	K07936	GTP-binding_nuclear_protein_Ran
Glyma06g07420	222	UniRef100_UPI00019AA8E7 UPI00019AA8E7 related cluster n=1 Tax=unknown RepID=UPI00019AA8E7	1e-164	99.55	UniRef100_Q8S2Z7 GTP-binding protein n=1 Tax=Helianthus annuus RepID=Q8S2Z7_HELAN	6e-162	99.55	AT5G55190.1 | Symbols: RAN3, ATRAN3 | RAN GTPase 3 | chr5:22392285-22393957 FORWARD LENGTH=221	1e-163	99.55	GO:0006184 GO:0006406 GO:0006606 GO:0006886 GO:0006913 GO:0007165 GO:0007264	GTP catabolic process; mRNA export from nucleus; protein import into nucleus; intracellular protein transport; nucleocytoplasmic transport; signal transduction; small GTPase mediated signal transduction	GO:0003924 GO:0005515 GO:0005525	GTPase activity; protein binding; GTP binding	GO:0005634 GO:0005794 GO:0009506	nucleus; Golgi apparatus; plasmodesma	PF00071	Ras family	PTHR24071	FAMILY NOT NAMED	KOG0096	GTPase_Ran/TC4/GSP1_(nuclear_protein_transport_pathway),_small_G_protein_superfamily	NA	NA	K07936	GTP-binding_nuclear_protein_Ran
Glyma06g07440	366	UniRef100_I1K8X9 Uncharacterized protein n=1 Tax=Glycine max RepID=I1K8X9_SOYBN	0	99.73	UniRef100_Q43557 Unidentified n=1 Tax=Medicago sativa RepID=Q43557_MEDSA	0	99.45	AT5G11420.1 | Symbols: | Protein of unknown function, DUF642 | chr5:3644655-3646991 FORWARD LENGTH=366	0	99.45	GO:0008150	biological process	GO:0003674	molecular function	GO:0005576 GO:0005618 GO:0009505	extracellular region; cell wall; plant-type cell wall	PF04862	Protein of unknown function, DUF642	NA	NA	NA	NA	NA	NA	NA	NA
Glyma06g07460	373	UniRef100_I1K8Y0 Uncharacterized protein n=1 Tax=Glycine max RepID=I1K8Y0_SOYBN	0	99.73	UniRef100_Q43557 Unidentified n=1 Tax=Medicago sativa RepID=Q43557_MEDSA	0	97.86	AT5G11420.1 | Symbols: | Protein of unknown function, DUF642 | chr5:3644655-3646991 FORWARD LENGTH=366	0	97.32	GO:0008150	biological process	GO:0003674	molecular function	GO:0005576 GO:0005618 GO:0009505	extracellular region; cell wall; plant-type cell wall	PF04862	Protein of unknown function, DUF642	NA	NA	NA	NA	NA	NA	NA	NA
Glyma06g07470	880	UniRef100_UPI000233A44B UPI000233A44B related cluster n=1 Tax=unknown RepID=UPI000233A44B	0	99.89	UniRef100_B9STQ4 Potassium channel AKT1, putative n=1 Tax=Ricinus communis RepID=B9STQ4_RICCO	0	95.45	AT2G26650.1 | Symbols: AKT1, ATAKT1, KT1 | K+ transporter 1 | chr2:11331965-11336444 REVERSE LENGTH=857	0	95.68	GO:0000041 GO:0006813 GO:0006826 GO:0007155 GO:0009414 GO:0009651 GO:0010014 GO:0010090 GO:0010106 GO:0010107 GO:0010167 GO:0015706 GO:0016049 GO:0045010 GO:0045595 GO:0048589 GO:0048765 GO:0048767 GO:0071555 GO:0090333	transition metal ion transport; potassium ion transport; iron ion transport; cell adhesion; response to water deprivation; response to salt stress; meristem initiation; trichome morphogenesis; cellular response to iron ion starvation; potassium ion import; response to nitrate; nitrate transport; cell growth; actin nucleation; regulation of cell differentiation; developmental growth; root hair cel…	GO:0005242 GO:0005515 GO:0030551 GO:0042802	inward rectifier potassium channel activity; protein binding; cyclic nucleotide binding; identical protein binding	GO:0005886 GO:0016020	plasma membrane; membrane	PF11834 PF00023 PF00520 PF00027	Domain of unknown function (DUF3354); Ankyrin repeat; Ion transport protein; Cyclic nucleotide-binding domain	PTHR10217 PTHR10217:SF6	VOLTAGE AND LIGAND GATED POTASSIUM CHANNEL; EAG-RELATED VOLTAGE-GATED POTASSIUM CHANNEL	KOG0498	K+-channel_ERG_and_related_proteins,_contain_PAS/PAC_sensor_domain	NA	NA	NA	NA
Glyma06g07480	656	UniRef100_UPI000233A007 UPI000233A007 related cluster n=1 Tax=unknown RepID=UPI000233A007	0	99.85	UniRef100_G7JBM4 Anion exchanger family protein n=1 Tax=Medicago truncatula RepID=G7JBM4_MEDTR	0	99.54	AT1G15460.1 | Symbols: ATBOR4, BOR4 | HCO3- transporter family | chr1:5310196-5313376 REVERSE LENGTH=683	0	99.24	GO:0006820 GO:0046713 GO:0080029	anion transport; borate transport; cellular response to boron-containing substance levels	GO:0005452 GO:0015301 GO:0080139	inorganic anion exchanger activity; anion:anion antiporter activity; borate efflux transmembrane transporter activity	GO:0005886 GO:0016020 GO:0016021	plasma membrane; membrane; integral to membrane	PF00955	HCO3- transporter family	PTHR11453 PTHR11453:SF6	ANION EXCHANGE PROTEIN; ANION EXCHANGE PROTEIN-RELATED	NA	NA	NA	NA	NA	NA
Glyma06g07500	141	UniRef100_I1K8Y4 Uncharacterized protein n=1 Tax=Glycine max RepID=I1K8Y4_SOYBN	2e-97	99.29	UniRef100_G7JBM8 EG45-like domain containing protein n=3 Tax=Medicago truncatula RepID=G7JBM8_MEDTR	6e-67	85.11	AT2G18660.1 | Symbols: PNP-A | plant natriuretic peptide A | chr2:8091032-8091644 REVERSE LENGTH=130	3e-13	78.01	GO:0009627 GO:0010230 GO:0034976	systemic acquired resistance; alternative respiration; response to endoplasmic reticulum stress	NA	NA	GO:0005576 GO:0005618 GO:0048046	extracellular region; cell wall; apoplast	PF03330	Rare lipoprotein A (RlpA)-like double-psi beta-barrel	NA	NA	NA	NA	NA	NA	NA	NA
Glyma06g07510	137	UniRef100_C6SYX1 Histone H2A n=1 Tax=Glycine max RepID=C6SYX1_SOYBN	9e-90	99.27	UniRef100_C6SYX1 Histone H2A n=1 Tax=Glycine max RepID=C6SYX1_SOYBN	9e-90	99.27	AT1G52740.1 | Symbols: HTA9 | histone H2A protein 9 | chr1:19645409-19646221 FORWARD LENGTH=134	1e-74	99.27	GO:0006338 GO:0009266 GO:0009909 GO:0010468 GO:0042742 GO:0044030	chromatin remodeling; response to temperature stimulus; regulation of flower development; regulation of gene expression; defense response to bacterium; regulation of DNA methylation	GO:0003677 GO:0005515	DNA binding; protein binding	GO:0000786 GO:0005634 GO:0005773	nucleosome; nucleus; vacuole	PF00125	Core histone H2A/H2B/H3/H4	PTHR23430	HISTONE H2A	KOG1757	Histone_2A	NA	NA	K11251	histone_H2A
Glyma06g07520	193	UniRef100_I1K8Y6 Uncharacterized protein n=1 Tax=Glycine max RepID=I1K8Y6_SOYBN	6e-140	99.48	UniRef100_G7JBN9 NAD(P)H-quinone oxidoreductase subunit H n=1 Tax=Medicago truncatula RepID=G7JBN9_MEDTR	9e-95	96.37	AT2G25605.1 | Symbols: | unknown protein; FUNCTIONS IN: molecular_function unknown; INVOLVED IN: biological_process unknown; LOCATED IN: chloroplast; Has 75 Blast hits to 75 proteins in 20 species: Archae - 2; Bacteria - 4; Metazoa - 0; Fungi - 0; Plants - 36; Viruses - 0; Other Eukaryotes - 33 (source: NCBI BLink). | chr2:10899541-10900875 FORWARD LENGTH=200	2e-103	99.48	GO:0008150	biological process	GO:0003674	molecular function	NA	NA	NA	NA	NA	NA	NA	NA	NA	NA	NA	NA
Glyma06g07540	1449	UniRef100_UPI000233A44D UPI000233A44D related cluster n=1 Tax=unknown RepID=UPI000233A44D	0	99.93	UniRef100_G7JBP0 Pleiotropic drug resistance protein n=1 Tax=Medicago truncatula RepID=G7JBP0_MEDTR	0	99.93	AT1G15520.1 | Symbols: PDR12, ATPDR12, ABCG40, ATABCG40 | pleiotropic drug resistance 12 | chr1:5331993-5338175 REVERSE LENGTH=1423	0	98.96	GO:0000165 GO:0006612 GO:0006855 GO:0007165 GO:0009414 GO:0009595 GO:0009697 GO:0009723 GO:0009733 GO:0009737 GO:0009738 GO:0009751 GO:0009753 GO:0009862 GO:0009867 GO:0010193 GO:0010200 GO:0010310 GO:0010363 GO:0015692 GO:0031348 GO:0042538 GO:0042742 GO:0043069 GO:0043900 GO:0046865 GO:0050832 GO:0080168	MAPK cascade; protein targeting to membrane; drug transmembrane transport; signal transduction; response to water deprivation; detection of biotic stimulus; salicylic acid biosynthetic process; response to ethylene stimulus; response to auxin stimulus; response to abscisic acid stimulus; abscisic acid mediated signaling pathway; response to salicylic acid stimulus; response to jasmonic acid stimu…	GO:0000166 GO:0005524 GO:0016887 GO:0017111 GO:0042626	nucleotide binding; ATP binding; ATPase activity; nucleoside-triphosphatase activity; ATPase activity, coupled to transmembrane movement of substances	GO:0005886	plasma membrane	PF00005 PF01061 PF08370	ABC transporter; ABC-2 type transporter; Plant PDR ABC transporter associated	PTHR19241 PTHR19241:SF10	ATP-BINDING CASSETTE TRANSPORTER; ATP-BINDING CASSETTE TRANSPORTER-RELATED	KOG0065	Pleiotropic_drug_resistance_proteins_(PDR1-15),_ABC_superfamily	NA	NA	NA	NA
Glyma06g07550	371	UniRef100_I1K8Y8 Uncharacterized protein n=1 Tax=Glycine max RepID=I1K8Y8_SOYBN	0	99.73	UniRef100_B9RKV0 Protein phosphatase 2c, putative n=1 Tax=Ricinus communis RepID=B9RKV0_RICCO	0	97.3	AT2G25620.1 | Symbols: AtDBP1, DBP1 | DNA-binding protein phosphatase 1 | chr2:10903154-10904978 REVERSE LENGTH=392	0	99.73	GO:0006470 GO:0050688	protein dephosphorylation; regulation of defense response to virus	GO:0003824 GO:0004722	catalytic activity; protein serine/threonine phosphatase activity	GO:0005737 GO:0008287	cytoplasm; protein serine/threonine phosphatase complex	PF00481	Protein phosphatase 2C	PTHR13832 PTHR13832:SF92	PROTEIN PHOSPHATASE 2C; PROTEIN PHOSPHATASE 2C	KOG0698	Serine/threonine_protein_phosphatase	NA	NA	NA	NA
Glyma06g07560	147	UniRef100_I1K8Z0 Uncharacterized protein n=1 Tax=Glycine max RepID=I1K8Z0_SOYBN	3e-101	99.32	UniRef100_Q8S8K8 Expressed protein n=1 Tax=Arabidopsis thaliana RepID=Q8S8K8_ARATH	8e-18	98.64	AT2G25625.2 | Symbols: | unknown protein; FUNCTIONS IN: molecular_function unknown; INVOLVED IN: biological_process unknown; LOCATED IN: chloroplast; EXPRESSED IN: 10 plant structures; EXPRESSED DURING: LP.06 six leaves visible, LP.04 four leaves visible, 4 anthesis, petal differentiation and expansion stage; Has 24 Blast hits to 24 proteins in 9 species: Archae - 0; Bacteria - 0; Metazoa - 0; Fu…	1e-20	98.64	GO:0008150	biological process	GO:0003674	molecular function	NA	NA	NA	NA	NA	NA	NA	NA	NA	NA	NA	NA
Glyma06g07570	403	UniRef100_I1K8Z1 Uncharacterized protein n=1 Tax=Glycine max RepID=I1K8Z1_SOYBN	0	99.75	UniRef100_G7I6C3 Dimethylaniline monooxygenase n=1 Tax=Medicago truncatula RepID=G7I6C3_MEDTR	0	97.27	AT5G11320.1 | Symbols: YUC4 | Flavin-binding monooxygenase family protein | chr5:3611429-3613361 REVERSE LENGTH=411	0	96.53	GO:0009851 GO:0009911 GO:0010229 GO:0022603 GO:0048825 GO:0048827 GO:0055114 GO:2000024	auxin biosynthetic process; positive regulation of flower development; inflorescence development; regulation of anatomical structure morphogenesis; cotyledon development; phyllome development; oxidation-reduction process; regulation of leaf development	GO:0004497 GO:0004499 GO:0016491 GO:0047434 GO:0050660 GO:0050661	monooxygenase activity; N,N-dimethylaniline monooxygenase activity; oxidoreductase activity; indolepyruvate decarboxylase activity; flavin adenine dinucleotide binding; NADP binding	GO:0000139 GO:0005783 GO:0005829 GO:0009507	Golgi membrane; endoplasmic reticulum; cytosol; chloroplast	PF00743 PF01494	Flavin-binding monooxygenase-like; FAD binding domain	PTHR23023 PTHR23023:SF5	DIMETHYLANILINE MONOOXYGENASE; MONOOXYGENASE	KOG1399	Flavin-containing_monooxygenase	1.14.13.-	With_NADH_or_NADPH_as_one_donor,_and_incorporation_of_one_atom	K11816	YUCCA_family_monooxygenase_[EC:1.14.13.-]
Glyma06g07580	978	UniRef100_UPI000233A450 UPI000233A450 related cluster n=1 Tax=unknown RepID=UPI000233A450	0	91.21	UniRef100_G7JBP5 NAD(P)H-quinone oxidoreductase subunit n=1 Tax=Medicago truncatula RepID=G7JBP5_MEDTR	0	91.21	AT4G32551.1 | Symbols: LUG, RON2 | LisH dimerisation motif;WD40/YVTN repeat-like-containing domain | chr4:15707863-15713359 FORWARD LENGTH=931	0	75.97	GO:0006306 GO:0006342 GO:0006346 GO:0007155 GO:0007267 GO:0009616 GO:0009855 GO:0009886 GO:0009887 GO:0009908 GO:0009909 GO:0010051 GO:0010090 GO:0010267 GO:0016246 GO:0016569 GO:0031047 GO:0035196 GO:0045010 GO:0045892 GO:0048439 GO:0048481 GO:0048507 GO:0048519 GO:0048765 GO:0071555 GO:0080001	DNA methylation; chromatin silencing; methylation-dependent chromatin silencing; cell adhesion; cell-cell signaling; virus induced gene silencing; determination of bilateral symmetry; post-embryonic morphogenesis; organ morphogenesis; flower development; regulation of flower development; xylem and phloem pattern formation; trichome morphogenesis; production of ta-siRNAs involved in RNA interferen…	GO:0005515 GO:0046982	protein binding; protein heterodimerization activity	GO:0005634 GO:0005737	nucleus; cytoplasm	PF00400 PF08513	WD domain, G-beta repeat; LisH	PTHR22847	WD40 REPEAT PROTEIN	KOG0266	WD40_repeat-containing_protein	NA	NA	NA	NA
Glyma06g07600	309	UniRef100_UPI000233A451 UPI000233A451 related cluster n=1 Tax=unknown RepID=UPI000233A451	0	99.68	UniRef100_G7I6C0 2-oxoglutarate-dependent dioxygenase n=1 Tax=Medicago truncatula RepID=G7I6C0_MEDTR	1e-117	90.94	AT1G52820.1 | Symbols: | 2-oxoglutarate (2OG) and Fe(II)-dependent oxygenase superfamily protein | chr1:19669216-19670321 FORWARD LENGTH=317	2e-66	97.41	GO:0055114	oxidation-reduction process	GO:0016491 GO:0016706	oxidoreductase activity; oxidoreductase activity, acting on paired donors, with incorporation or reduction of molecular oxygen, 2-oxoglutarate as one donor, and incorporation of one atom each of oxygen into both donors	GO:0005737	cytoplasm	PF03171	2OG-Fe(II) oxygenase superfamily	PTHR10209 PTHR10209:SF55	FE(II)/ ASCORBATE OXIDASE SUPERFAMILY; OXIDOREDUCTASE, 2OG-FE(II) OXYGENASE FAMILY PROTEI	KOG0143	Iron/ascorbate_family_oxidoreductases	NA	NA	NA	NA
Glyma06g07630	348	UniRef100_I1K8Z6 Uncharacterized protein n=1 Tax=Glycine max RepID=I1K8Z6_SOYBN	0	99.71	UniRef100_G7I6B9 Gibberellin 3-beta-dioxygenase n=1 Tax=Medicago truncatula RepID=G7I6B9_MEDTR	0	99.71	AT1G15550.1 | Symbols: GA4, ATGA3OX1, GA3OX1 | gibberellin 3-oxidase 1 | chr1:5344569-5346078 REVERSE LENGTH=358	2e-109	99.14	GO:0009639 GO:0009686 GO:0009739 GO:0009740 GO:0010114 GO:0055114	response to red or far red light; gibberellin biosynthetic process; response to gibberellin stimulus; gibberellic acid mediated signaling pathway; response to red light; oxidation-reduction process	GO:0005506 GO:0008134 GO:0016491 GO:0016706 GO:0016707	iron ion binding; transcription factor binding; oxidoreductase activity; oxidoreductase activity, acting on paired donors, with incorporation or reduction of molecular oxygen, 2-oxoglutarate as one donor, and incorporation of one atom each of oxygen into both donors; gibberellin 3-beta-dioxygenase activity	GO:0005737	cytoplasm	PF03171	2OG-Fe(II) oxygenase superfamily	PTHR10209 PTHR10209:SF55	FE(II)/ ASCORBATE OXIDASE SUPERFAMILY; OXIDOREDUCTASE, 2OG-FE(II) OXYGENASE FAMILY PROTEI	KOG0143	Iron/ascorbate_family_oxidoreductases	NA	NA	NA	NA
Glyma06g07640	414	UniRef100_I1K8Z7 Uncharacterized protein n=1 Tax=Glycine max RepID=I1K8Z7_SOYBN	0	99.76	UniRef100_G7JBP9 Protein TIFY n=1 Tax=Medicago truncatula RepID=G7JBP9_MEDTR	0	95.41	AT4G32570.1 | Symbols: TIFY8 | TIFY domain protein 8 | chr4:15716433-15718702 REVERSE LENGTH=361	8e-58	94.44	GO:0008150	biological process	GO:0005515	protein binding	GO:0005634	nucleus	PF06200	tify domain	NA	NA	NA	NA	NA	NA	NA	NA
Glyma06g07650	378	UniRef100_UPI000233A181 UPI000233A181 related cluster n=1 Tax=unknown RepID=UPI000233A181	0	98.15	UniRef100_G7I3F8 Glucan endo-1,3-beta-glucosidase n=1 Tax=Medicago truncatula RepID=G7I3F8_MEDTR	7e-169	91.8	AT5G24318.2 | Symbols: | O-Glycosyl hydrolases family 17 protein | chr5:8282390-8283956 REVERSE LENGTH=452	2e-132	90.74	GO:0005975	carbohydrate metabolic process	GO:0003824 GO:0004553 GO:0043169	catalytic activity; hydrolase activity, hydrolyzing O-glycosyl compounds; cation binding	GO:0005576	extracellular region	PF00332	Glycosyl hydrolases family 17	PTHR16631	GLUCAN 1,3-BETA-GLUCOSIDASE-RELATED	NA	NA	NA	NA	NA	NA
Glyma06g07680	498	UniRef100_I1K903 Uncharacterized protein n=1 Tax=Glycine max RepID=I1K903_SOYBN	0	99.8	UniRef100_G7JBQ2 Serine/threonine protein phosphatase 2A 57 kDa regulatory subunit B' iota isoform n=1 Tax=Medicago truncatula RepID=G7JBQ2_MEDTR	0	99.8	AT5G25510.1 | Symbols: | Protein phosphatase 2A regulatory B subunit family protein | chr5:8882728-8884325 REVERSE LENGTH=500	0	99.6	GO:0007165	signal transduction	GO:0008601	protein phosphatase type 2A regulator activity	GO:0000159	protein phosphatase type 2A complex	PF01603	Protein phosphatase 2A regulatory B subunit (B56 family)	PTHR10257 PTHR10257:SF3	PROTEIN PHOSPHATASE 2A, REGULATORY SUBUNIT; gb def: putative protein phosphatase 2a regulatory subunit b [oryza sativa]	KOG2085	Serine/threonine_protein_phosphatase_2A,_regulatory_subunit	NA	NA	K11584	protein_phosphatase_2_(formerly_2A),_regulatory_subunit_B'
Glyma06g07690	407	UniRef100_I1K904 Uncharacterized protein n=1 Tax=Glycine max RepID=I1K904_SOYBN	0	94.84	UniRef100_B9RS95 Ring finger protein, putative n=1 Tax=Ricinus communis RepID=B9RS95_RICCO	2e-166	99.26	AT4G32600.1 | Symbols: | RING/U-box superfamily protein | chr4:15724010-15725737 FORWARD LENGTH=453	8e-151	79.61	NA	NA	GO:0008270	zinc ion binding	GO:0005634 GO:0005886	nucleus; plasma membrane	PF00097	Zinc finger, C3HC4 type (RING finger)	PTHR14155 PTHR14155:SF27	RING FINGER PROTEIN 6/12/38; OS09G0323100 PROTEIN	NA	NA	NA	NA	NA	NA
Glyma06g07700	1144	UniRef100_UPI000233A456 UPI000233A456 related cluster n=1 Tax=unknown RepID=UPI000233A456	0	99.91	UniRef100_G7JBQ4 Transcription elongation factor A protein n=1 Tax=Medicago truncatula RepID=G7JBQ4_MEDTR	0	99.74	AT5G11430.1 | Symbols: | SPOC domain / Transcription elongation factor S-II protein | chr5:3648469-3652256 FORWARD LENGTH=873	2e-155	81.47	GO:0006351	transcription, DNA-dependent	GO:0008270	zinc ion binding	GO:0005634	nucleus	PF07500 PF07744	Transcription factor S-II (TFIIS), central domain; SPOC domain	PTHR11477	TRANSCRIPTION ELONGATION FACTOR S-II	KOG1634	Predicted_transcription_factor_DATF1,_contains_PHD_and_TFS2M_domains	NA	NA	NA	NA
Glyma06g07710	327	UniRef100_I1K906 Uncharacterized protein n=1 Tax=Glycine max RepID=I1K906_SOYBN	0	99.69	UniRef100_G7JBQ5 DnaJ homolog subfamily B member n=1 Tax=Medicago truncatula RepID=G7JBQ5_MEDTR	3e-179	99.39	AT5G25530.1 | Symbols: | DNAJ heat shock family protein | chr5:8889665-8890954 REVERSE LENGTH=347	5e-169	99.39	GO:0006457	protein folding	GO:0031072 GO:0051082	heat shock protein binding; unfolded protein binding	GO:0005737	cytoplasm	PF00226 PF01556	DnaJ domain; DnaJ C terminal region	PTHR24077 PTHR24077:SF88	FAMILY NOT NAMED;	KOG0714	Molecular_chaperone_(DnaJ_superfamily)	NA	NA	NA	NA
Glyma06g07720	150	UniRef100_I1K907 Uncharacterized protein n=1 Tax=Glycine max RepID=I1K907_SOYBN	9e-104	99.33	UniRef100_D7M3Q7 CID5/IPD1 n=1 Tax=Arabidopsis lyrata subsp. lyrata RepID=D7M3Q7_ARALL	2e-17	80	AT5G11440.1 | Symbols: CID5, IPD1 | CTC-interacting domain 5 | chr5:3653060-3653607 REVERSE LENGTH=155	1e-16	80	GO:0008150	biological process	GO:0005515	protein binding	GO:0005634	nucleus	NA	NA	NA	NA	NA	NA	NA	NA	NA	NA
Glyma06g07730	296	UniRef100_I1K908 Uncharacterized protein n=1 Tax=Glycine max RepID=I1K908_SOYBN	0	99.66	UniRef100_G7JBQ7 PsbP domain-containing protein n=1 Tax=Medicago truncatula RepID=G7JBQ7_MEDTR	1e-119	99.32	AT5G11450.1 | Symbols: | Mog1/PsbP/DUF1795-like photosystem II reaction center PsbP family protein | chr5:3654475-3656357 FORWARD LENGTH=297	2e-114	93.58	GO:0000023 GO:0010027 GO:0015979 GO:0019252 GO:0019288 GO:0045036 GO:0045893	maltose metabolic process; thylakoid membrane organization; photosynthesis; starch biosynthetic process; isopentenyl diphosphate biosynthetic process, mevalonate-independent pathway; protein targeting to chloroplast; positive regulation of transcription, DNA-dependent	GO:0005509	calcium ion binding	GO:0009507 GO:0009535 GO:0009543 GO:0009579 GO:0031977	chloroplast; chloroplast thylakoid membrane; chloroplast thylakoid lumen; thylakoid; thylakoid lumen	PF01789	PsbP	NA	NA	NA	NA	NA	NA	NA	NA
Glyma06g07740	2151	UniRef100_UPI000233A184 UPI000233A184 related cluster n=1 Tax=unknown RepID=UPI000233A184	0	99.95	UniRef100_D7LBF6 EMB2410 n=1 Tax=Arabidopsis lyrata subsp. lyrata RepID=D7LBF6_ARALL	0	97.86	AT2G25660.1 | Symbols: emb2410 | embryo defective 2410 | chr2:10916456-10927390 REVERSE LENGTH=2166	0	99.02	GO:0009630 GO:0009793	gravitropism; embryo development ending in seed dormancy	GO:0003674	molecular function	GO:0009507 GO:0048046	chloroplast; apoplast	PF04357	Family of unknown function (DUF490)	NA	NA	NA	NA	NA	NA	NA	NA
Glyma06g07750	323	UniRef100_I1K910 Uncharacterized protein n=1 Tax=Glycine max RepID=I1K910_SOYBN	0	99.69	UniRef100_B9DH39 AT2G25670 protein n=1 Tax=Arabidopsis thaliana RepID=B9DH39_ARATH	4e-57	99.69	AT2G25670.2 | Symbols: | BEST Arabidopsis thaliana protein match is: copper ion binding (TAIR:AT4G32610.1); Has 43784 Blast hits to 26928 proteins in 1799 species: Archae - 86; Bacteria - 6347; Metazoa - 15971; Fungi - 5398; Plants - 1931; Viruses - 259; Other Eukaryotes - 13792 (source: NCBI BLink). | chr2:10929062-10930619 REVERSE LENGTH=318	2e-54	99.69	GO:0008150	biological process	GO:0003674	molecular function	GO:0005634 GO:0005829	nucleus; cytosol	NA	NA	NA	NA	NA	NA	NA	NA	NA	NA
Glyma06g07760	337	UniRef100_I1K911 Uncharacterized protein n=1 Tax=Glycine max RepID=I1K911_SOYBN	0	99.7	UniRef100_B9RPA3 Syntaxin, putative n=1 Tax=Ricinus communis RepID=B9RPA3_RICCO	6e-158	98.22	AT3G24350.1 | Symbols: SYP32, ATSYP32 | syntaxin of plants 32 | chr3:8837733-8839402 FORWARD LENGTH=347	3e-149	99.7	GO:0006886 GO:0006944 GO:0016192	intracellular protein transport; cellular membrane fusion; vesicle-mediated transport	GO:0005484	SNAP receptor activity	GO:0005794 GO:0016020	Golgi apparatus; membrane	PF00804 PF05739	Syntaxin; SNARE domain	PTHR19957 PTHR19957:SF3	SYNTAXIN; SYNTAXIN	KOG0812	SNARE_protein_SED5/Syntaxin_5	NA	NA	NA	NA
Glyma06g07770	340	UniRef100_I1K912 Uncharacterized protein n=1 Tax=Glycine max RepID=I1K912_SOYBN	0	99.71	UniRef100_B9RPA3 Syntaxin, putative n=1 Tax=Ricinus communis RepID=B9RPA3_RICCO	8e-159	98.24	AT3G24350.1 | Symbols: SYP32, ATSYP32 | syntaxin of plants 32 | chr3:8837733-8839402 FORWARD LENGTH=347	3e-151	99.71	GO:0006886 GO:0006944 GO:0016192	intracellular protein transport; cellular membrane fusion; vesicle-mediated transport	GO:0005484	SNAP receptor activity	GO:0005794 GO:0016020	Golgi apparatus; membrane	PF00804 PF05739	Syntaxin; SNARE domain	PTHR19957 PTHR19957:SF3	SYNTAXIN; SYNTAXIN	KOG0812	SNARE_protein_SED5/Syntaxin_5	NA	NA	K08490	syntaxin_5
Glyma06g07780	463	UniRef100_I1K913 Uncharacterized protein n=2 Tax=Glycine max RepID=I1K913_SOYBN	0	96.11	UniRef100_B9RS83 Sulfate transporter, putative n=1 Tax=Ricinus communis RepID=B9RS83_RICCO	0	90.5	AT2G25680.1 | Symbols: MOT1 | molybdate transporter 1 | chr2:10933167-10934537 REVERSE LENGTH=456	0	95.25	GO:0015689	molybdate ion transport	GO:0015098 GO:0015116	molybdate ion transmembrane transporter activity; sulfate transmembrane transporter activity	GO:0005739 GO:0005773 GO:0009507	mitochondrion; vacuole; chloroplast	NA	NA	NA	NA	NA	NA	NA	NA	NA	NA
Glyma06g07790	596	UniRef100_I1JUK0 Uncharacterized protein n=2 Tax=Glycine max RepID=I1JUK0_SOYBN	0	99.66	UniRef100_D7MH91 Zinc ion binding protein n=1 Tax=Arabidopsis lyrata subsp. lyrata RepID=D7MH91_ARALL	1e-158	98.15	AT1G60560.1 | Symbols: | SWIM zinc finger family protein | chr1:22308791-22311277 REVERSE LENGTH=703	1e-171	99.16	GO:0008150	biological process	GO:0008270	zinc ion binding	GO:0005634	nucleus	NA	NA	NA	NA	NA	NA	NA	NA	NA	NA
Glyma06g07800	310	UniRef100_I1K915 Uncharacterized protein n=1 Tax=Glycine max RepID=I1K915_SOYBN	0	99.68	UniRef100_G7JC88 RING finger and CHY zinc finger domain-containing protein n=1 Tax=Medicago truncatula RepID=G7JC88_MEDTR	0	99.68	AT5G25560.1 | Symbols: | CHY-type/CTCHY-type/RING-type Zinc finger protein | chr5:8899486-8901391 FORWARD LENGTH=308	7e-156	88.39	NA	NA	GO:0008270	zinc ion binding	GO:0005634	nucleus	PF05495 PF00097	CHY zinc finger; Zinc finger, C3HC4 type (RING finger)	PTHR21319	RING FINGER AND CHY ZINC FINGER DOMAIN CONTAINING 1	KOG1940	Zn-finger_protein	NA	NA	NA	NA
Glyma06g07810	423	UniRef100_I1K917 Uncharacterized protein n=1 Tax=Glycine max RepID=I1K917_SOYBN	0	99.76	UniRef100_Q75GB5 Expressed protein n=3 Tax=Oryza sativa RepID=Q75GB5_ORYSJ	8e-23	37.35	AT2G25690.2 | Symbols: | Protein of unknown function (DUF581) | chr2:10940530-10941649 REVERSE LENGTH=324	5e-33	92.43	GO:0008150	biological process	GO:0003674	molecular function	GO:0005634	nucleus	PF04570	Protein of unknown function (DUF581)	NA	NA	NA	NA	NA	NA	NA	NA
Glyma06g07820	89	UniRef100_I1K921 Uncharacterized protein n=1 Tax=Glycine max RepID=I1K921_SOYBN	1e-55	98.88	NA	NA	NA	AT5G25570.2 | Symbols: | unknown protein; Has 35333 Blast hits to 34131 proteins in 2444 species: Archae - 798; Bacteria - 22429; Metazoa - 974; Fungi - 991; Plants - 531; Viruses - 0; Other Eukaryotes - 9610 (source: NCBI BLink). | chr5:8901832-8902891 FORWARD LENGTH=99	5e-25	87.64	GO:0008150	biological process	GO:0003674	molecular function	GO:0005634 GO:0009507	nucleus; chloroplast	NA	NA	NA	NA	NA	NA	NA	NA	NA	NA
Glyma06g07840	595	UniRef100_UPI000233A187 UPI000233A187 related cluster n=1 Tax=unknown RepID=UPI000233A187	0	99.83	UniRef100_G7JC98 Potassium channel n=1 Tax=Medicago truncatula RepID=G7JC98_MEDTR	0	99.83	AT4G32650.3 | Symbols: ATKC1, KAT3, KC1, AtLKT1 | potassium channel in Arabidopsis thaliana 3 | chr4:15751482-15754797 REVERSE LENGTH=661	0	98.49	GO:0006811 GO:0006813 GO:0009624 GO:0010163 GO:0010167 GO:0015706 GO:0055085	ion transport; potassium ion transport; response to nematode; high-affinity potassium ion import; response to nitrate; nitrate transport; transmembrane transport	GO:0005242 GO:0005515 GO:0030551	inward rectifier potassium channel activity; protein binding; cyclic nucleotide binding	GO:0005783 GO:0005886 GO:0009507 GO:0016020	endoplasmic reticulum; plasma membrane; chloroplast; membrane	PF07885 PF00027 PF11834	Ion channel; Cyclic nucleotide-binding domain; Domain of unknown function (DUF3354)	PTHR10217 PTHR10217:SF6	VOLTAGE AND LIGAND GATED POTASSIUM CHANNEL; EAG-RELATED VOLTAGE-GATED POTASSIUM CHANNEL	KOG0498	K+-channel_ERG_and_related_proteins,_contain_PAS/PAC_sensor_domain	NA	NA	NA	NA
Glyma06g07850	2476	UniRef100_UPI000233A5C9 UPI000233A5C9 related cluster n=1 Tax=unknown RepID=UPI000233A5C9	0	99.96	UniRef100_G7JCA1 Leucine-rich repeat-containing protein n=1 Tax=Medicago truncatula RepID=G7JCA1_MEDTR	0	89.46	AT2G25730.2 | Symbols: | unknown protein; LOCATED IN: cellular_component unknown; EXPRESSED IN: 23 plant structures; EXPRESSED DURING: 14 growth stages. | chr2:10956751-10972729 REVERSE LENGTH=2487	0	99.96	GO:0007623	circadian rhythm	NA	NA	GO:0005634	nucleus	NA	NA	PTHR22835 PTHR22835:SF45	ZINC FINGER FYVE DOMAIN CONTAINING PROTEIN; ZINC FINGER FYVE DOMAIN CONTAINING PROTEIN	KOG1811	Predicted_Zn2+-binding_protein,_contains_FYVE_domain	NA	NA	NA	NA
Glyma06g07870	344	UniRef100_I1K925 Uncharacterized protein n=1 Tax=Glycine max RepID=I1K925_SOYBN	0	99.71	UniRef100_G7JCA9 Acetylglutamate kinase-like protein n=2 Tax=Medicago truncatula RepID=G7JCA9_MEDTR	1e-176	99.42	AT3G57560.1 | Symbols: NAGK | N-acetyl-l-glutamate kinase | chr3:21311164-21312207 REVERSE LENGTH=347	5e-160	97.67	GO:0006526 GO:0006561 GO:0008652 GO:0042450	arginine biosynthetic process; proline biosynthetic process; cellular amino acid biosynthetic process; arginine biosynthetic process via ornithine	GO:0003991 GO:0004349 GO:0005515 GO:0034618	acetylglutamate kinase activity; glutamate 5-kinase activity; protein binding; arginine binding	GO:0005737 GO:0009507 GO:0009534	cytoplasm; chloroplast; chloroplast thylakoid	PF00696	Amino acid kinase family	PTHR24802 PTHR24802:SF2	FAMILY NOT NAMED;	KOG1154	Gamma-glutamyl_kinase	2.7.2.- 2.7.2.8	Phosphotransferases_with_a_carboxyl_group_as_acceptor. Acetylglutamate_kinase	K00930	acetylglutamate/acetylaminoadipate_kinase_[EC:2.7.2.8_2.7.2.-]
Glyma06g07880	1924	UniRef100_UPI000233A189 UPI000233A189 related cluster n=1 Tax=unknown RepID=UPI000233A189	0	99.74	UniRef100_Q9M086 DDB1- and CUL4-associated factor homolog 1 n=1 Tax=Arabidopsis thaliana RepID=DCAF1_ARATH	0	96.26	AT4G31160.1 | Symbols: DCAF1 | DDB1-CUL4 associated factor 1 | chr4:15145936-15152939 FORWARD LENGTH=1883	0	96.26	GO:0007062 GO:0009640 GO:0009793 GO:0009845 GO:0009880 GO:0009908 GO:0009909 GO:0009933 GO:0010072 GO:0010154 GO:0010162 GO:0010182 GO:0010228 GO:0010431 GO:0010564 GO:0016567 GO:0019915 GO:0045595 GO:0048366 GO:0048367 GO:0048825 GO:0048827 GO:0050826 GO:0051301	sister chromatid cohesion; photomorphogenesis; embryo development ending in seed dormancy; seed germination; embryonic pattern specification; flower development; regulation of flower development; meristem structural organization; primary shoot apical meristem specification; fruit development; seed dormancy process; sugar mediated signaling pathway; vegetative to reproductive phase transition of m…	GO:0000166 GO:0005515	nucleotide binding; protein binding	GO:0005634 GO:0080008	nucleus; CUL4-RING ubiquitin ligase complex	NA	NA	PTHR13129 PTHR13129:SF4	VPRBP PROTEIN-RELATED; gb def: ebip9171 [anopheles gambiae str. pest]	KOG1832	HIV-1_Vpr-binding_protein	NA	NA	K11789	HIV-1_Vpr-binding_protein
Glyma06g07890	483	UniRef100_I1K927 Uncharacterized protein n=1 Tax=Glycine max RepID=I1K927_SOYBN	0	99.79	UniRef100_G7JCB1 Glucan endo-1 3-beta-glucosidase n=1 Tax=Medicago truncatula RepID=G7JCB1_MEDTR	0	98.76	AT4G31140.1 | Symbols: | O-Glycosyl hydrolases family 17 protein | chr4:15141581-15143188 FORWARD LENGTH=484	0	98.96	GO:0005975	carbohydrate metabolic process	GO:0003824 GO:0004553 GO:0043169	catalytic activity; hydrolase activity, hydrolyzing O-glycosyl compounds; cation binding	GO:0005773 GO:0005886 GO:0009505 GO:0009506 GO:0031225 GO:0046658	vacuole; plasma membrane; plant-type cell wall; plasmodesma; anchored to membrane; anchored to plasma membrane	PF00332 PF07983	Glycosyl hydrolases family 17; X8 domain	PTHR16631	GLUCAN 1,3-BETA-GLUCOSIDASE-RELATED	NA	NA	NA	NA	NA	NA
Glyma06g07900	192	UniRef100_C6T3Q0 Uncharacterized protein n=1 Tax=Glycine max RepID=C6T3Q0_SOYBN	2e-134	99.48	NA	NA	NA	AT4G31130.1 | Symbols: | Protein of unknown function (DUF1218) | chr4:15137159-15138465 REVERSE LENGTH=195	5e-85	98.44	GO:0008150	biological process	GO:0003674	molecular function	GO:0005576 GO:0005886	extracellular region; plasma membrane	PF06749	Protein of unknown function (DUF1218)	NA	NA	NA	NA	NA	NA	NA	NA
Glyma06g07920	1118	UniRef100_I1K929 Ubiquitin carboxyl-terminal hydrolase n=1 Tax=Glycine max RepID=I1K929_SOYBN	0	99.91	UniRef100_I1K929 Ubiquitin carboxyl-terminal hydrolase n=1 Tax=Glycine max RepID=I1K929_SOYBN	0	99.91	AT3G49600.1 | Symbols: UBP26, SUP32, ATUBP26 | ubiquitin-specific protease 26 | chr3:18380942-18386662 REVERSE LENGTH=1067	0	96.69	GO:0006511 GO:0007062 GO:0009640 GO:0009790 GO:0009793 GO:0009845 GO:0009880 GO:0009909 GO:0009933 GO:0010072 GO:0010162 GO:0010182 GO:0010228 GO:0010431 GO:0010564 GO:0016567 GO:0019915 GO:0045595 GO:0048316 GO:0048366 GO:0048825 GO:0050826 GO:0051301	ubiquitin-dependent protein catabolic process; sister chromatid cohesion; photomorphogenesis; embryo development; embryo development ending in seed dormancy; seed germination; embryonic pattern specification; regulation of flower development; meristem structural organization; primary shoot apical meristem specification; seed dormancy process; sugar mediated signaling pathway; vegetative to reprod…	GO:0004221 GO:0004843	ubiquitin thiolesterase activity; ubiquitin-specific protease activity	GO:0005634 GO:0005730	nucleus; nucleolus	PF00443 PF06337	Ubiquitin carboxyl-terminal hydrolase; DUSP domain	PTHR24006 PTHR24006:SF163	FAMILY NOT NAMED; SUBFAMILY NOT NAMED	KOG1863	Ubiquitin_carboxyl-terminal_hydrolase	3.1.2.15	Ubiquitin_thiolesterase	K11858	ubiquitin_carboxyl-terminal_hydrolase_48_[EC:3.1.2.15]
Glyma06g07930	409	UniRef100_UPI0001B63AA8 UPI0001B63AA8 related cluster n=1 Tax=unknown RepID=UPI0001B63AA8	0	99.76	UniRef100_G7JCC0 Protein lunapark n=1 Tax=Medicago truncatula RepID=G7JCC0_MEDTR	0	99.02	AT4G31080.1 | Symbols: | Protein of unknown function (DUF2296) | chr4:15121186-15123072 FORWARD LENGTH=409	1e-154	82.15	GO:0000902 GO:0006487 GO:0008150 GO:0016049 GO:0048193	cell morphogenesis; protein N-linked glycosylation; biological process; cell growth; Golgi vesicle transport	GO:0003674	molecular function	GO:0005634 GO:0005783	nucleus; endoplasmic reticulum	PF10058	Predicted integral membrane metal-binding protein (DUF2296)	PTHR22166 PTHR22166:SF1	FAMILY NOT NAMED; SUBFAMILY NOT NAMED	KOG2846	Predicted_membrane_protein	NA	NA	NA	NA
Glyma06g07940	240	UniRef100_I1K931 Uncharacterized protein n=1 Tax=Glycine max RepID=I1K931_SOYBN	2e-168	99.58	UniRef100_G7JCC6 Fasciclin-like arabinogalactan protein n=1 Tax=Medicago truncatula RepID=G7JCC6_MEDTR	1e-54	78.33	AT2G45470.1 | Symbols: FLA8, AGP8 | FASCICLIN-like arabinogalactan protein 8 | chr2:18742797-18744059 REVERSE LENGTH=420	1e-35	71.67	GO:0007389 GO:0008361 GO:0009664 GO:0009832 GO:0009926 GO:0010015 GO:0040007	pattern specification process; regulation of cell size; plant-type cell wall organization; plant-type cell wall biogenesis; auxin polar transport; root morphogenesis; growth	NA	NA	GO:0005886 GO:0009505 GO:0031225 GO:0046658 GO:0048046	plasma membrane; plant-type cell wall; anchored to membrane; anchored to plasma membrane; apoplast	PF02469	Fasciclin domain	NA	NA	NA	NA	NA	NA	NA	NA
Glyma06g07980	410	UniRef100_I1K935 Uncharacterized protein n=1 Tax=Glycine max RepID=I1K935_SOYBN	0	99.76	UniRef100_B9SPP1 Jun activation domain binding protein, putative n=1 Tax=Ricinus communis RepID=B9SPP1_RICCO	0	97.56	AT1G71230.1 | Symbols: CSN5B, CSN5, AJH2 | COP9-signalosome 5B | chr1:26852560-26854255 FORWARD LENGTH=358	0	98.05	GO:0000085 GO:0000338 GO:0009640 GO:0009733 GO:0010100 GO:0010387 GO:0010388 GO:0016567 GO:0016571 GO:0016579 GO:0045893	G2 phase of mitotic cell cycle; protein deneddylation; photomorphogenesis; response to auxin stimulus; negative regulation of photomorphogenesis; signalosome assembly; cullin deneddylation; protein ubiquitination; histone methylation; protein deubiquitination; positive regulation of transcription, DNA-dependent	GO:0005515	protein binding	GO:0005634 GO:0008180	nucleus; signalosome	PF01398	Mov34/MPN/PAD-1 family	PTHR10410 PTHR10410:SF6	JUN ACTIVATION DOMAIN BINDING PROTEIN; JUN ACTIVATION DOMAIN BINDING PROTEIN	KOG1554	COP9_signalosome,_subunit_CSN5	3.4.-.-	Acting_on_peptide_bonds_(peptide_hydrolases).	K09613	COP9_signalosome_complex_subunit_5_[EC:3.4.-.-]
Glyma06g07990	952	UniRef100_I1K937 Uncharacterized protein n=1 Tax=Glycine max RepID=I1K937_SOYBN	0	99.89	UniRef100_G7JCD0 Plasma membrane H+ ATPase n=1 Tax=Medicago truncatula RepID=G7JCD0_MEDTR	0	99.89	AT2G24520.1 | Symbols: AHA5, HA5 | H(+)-ATPase 5 | chr2:10415522-10419730 FORWARD LENGTH=931	0	97.79	GO:0006200 GO:0006754 GO:0006812 GO:0008152	ATP catabolic process; ATP biosynthetic process; cation transport; metabolic process	GO:0000166 GO:0003824 GO:0005524 GO:0015662 GO:0016887 GO:0046872	nucleotide binding; catalytic activity; ATP binding; ATPase activity, coupled to transmembrane movement of ions, phosphorylative mechanism; ATPase activity; metal ion binding	GO:0005886 GO:0016020 GO:0016021	plasma membrane; membrane; integral to membrane	PF00690 PF00122 PF00702	Cation transporter/ATPase, N-terminus; E1-E2 ATPase; haloacid dehalogenase-like hydrolase	PTHR24093 PTHR24093:SF61	FAMILY NOT NAMED; SUBFAMILY NOT NAMED	KOG0205	Plasma_membrane_H+-transporting_ATPase	3.6.3.6	Proton-exporting_ATPase	K01535	H+-transporting_ATPase_[EC:3.6.3.6]
Glyma06g08010	353	UniRef100_I1K938 Uncharacterized protein n=1 Tax=Glycine max RepID=I1K938_SOYBN	0	99.72	UniRef100_Q01LX6 OSIGBa0145C02.4 protein n=3 Tax=Oryza sativa RepID=Q01LX6_ORYSA	9e-145	85.84	AT5G10710.1 | Symbols: | INVOLVED IN: chromosome segregation, cell division; LOCATED IN: chromosome, centromeric region, nucleus; EXPRESSED IN: 23 plant structures; EXPRESSED DURING: 13 growth stages; CONTAINS InterPro DOMAIN/s: Centromere protein Cenp-O (InterPro:IPR018464); Has 30201 Blast hits to 17322 proteins in 780 species: Archae - 12; Bacteria - 1396; Metazoa - 17338; Fungi - 3422; Plants…	7e-145	88.67	GO:0006661 GO:0007059 GO:0051301	phosphatidylinositol biosynthetic process; chromosome segregation; cell division	NA	NA	GO:0000775 GO:0005634	chromosome, centromeric region; nucleus	PF09496	Cenp-O kinetochore centromere component	NA	NA	NA	NA	NA	NA	K11507	centromere_protein_O
Glyma06g08020	420	UniRef100_I1K940 Uncharacterized protein n=1 Tax=Glycine max RepID=I1K940_SOYBN	0	99.76	UniRef100_Q01HY7 OSIGBa0132E09-OSIGBa0108L24.2 protein n=2 Tax=Oryza sativa RepID=Q01HY7_ORYSA	5e-73	98.1	AT2G24530.1 | Symbols: | unknown protein; BEST Arabidopsis thaliana protein match is: unknown protein (TAIR:AT4G31440.1); Has 30201 Blast hits to 17322 proteins in 780 species: Archae - 12; Bacteria - 1396; Metazoa - 17338; Fungi - 3422; Plants - 5037; Viruses - 0; Other Eukaryotes - 2996 (source: NCBI BLink). | chr2:10422597-10423820 FORWARD LENGTH=407	5e-139	99.76	GO:0008150	biological process	GO:0003674	molecular function	GO:0005634	nucleus	NA	NA	NA	NA	NA	NA	NA	NA	NA	NA
Glyma06g08030	542	UniRef100_I1K941 Uncharacterized protein n=1 Tax=Glycine max RepID=I1K941_SOYBN	0	99.82	UniRef100_B9RNL9 Ring finger protein, putative n=1 Tax=Ricinus communis RepID=B9RNL9_RICCO	1e-176	99.63	AT5G24870.2 | Symbols: | RING/U-box superfamily protein | chr5:8545008-8546923 REVERSE LENGTH=520	5e-119	99.63	NA	NA	GO:0008270	zinc ion binding	GO:0005634	nucleus	PF00097	Zinc finger, C3HC4 type (RING finger); ;	PTHR14155 PTHR14155:SF28	RING FINGER PROTEIN 6/12/38; SUBFAMILY NOT NAMED	NA	NA	NA	NA	NA	NA
Glyma06g08040	419	UniRef100_I1K943 Uncharacterized protein n=1 Tax=Glycine max RepID=I1K943_SOYBN	0	99.76	UniRef100_B9RNM0 Thioredoxin domain-containing protein, putative n=1 Tax=Ricinus communis RepID=B9RNM0_RICCO	9e-15	99.05	NA	NA	NA	NA	NA	NA	NA	NA	NA	NA	NA	NA	NA	NA	NA	NA	NA	NA	NA
Glyma06g08050	400	UniRef100_I1K944 Uncharacterized protein n=1 Tax=Glycine max RepID=I1K944_SOYBN	0	87.25	UniRef100_G7JCD6 F-box protein AFR n=1 Tax=Medicago truncatula RepID=G7JCD6_MEDTR	2e-132	87.25	AT2G24540.1 | Symbols: AFR | Galactose oxidase/kelch repeat superfamily protein | chr2:10426414-10427532 FORWARD LENGTH=372	2e-111	85	GO:0009585 GO:0009744 GO:0009813 GO:0010017 GO:0010224 GO:0010264	red, far-red light phototransduction; response to sucrose stimulus; flavonoid biosynthetic process; red or far-red light signaling pathway; response to UV-B; myo-inositol hexakisphosphate biosynthetic process	GO:0005515	protein binding	GO:0005737	cytoplasm	NA	NA	PTHR24414 PTHR24414:SF184	FAMILY NOT NAMED;	NA	NA	NA	NA	NA	NA
Glyma06g08070	70	UniRef100_I1K945 Uncharacterized protein (Fragment) n=1 Tax=Glycine max RepID=I1K945_SOYBN	1e-38	88.57	NA	NA	NA	AT5G10695.1 | Symbols: | unknown protein; BEST Arabidopsis thaliana protein match is: unknown protein (TAIR:AT5G57123.1); Has 30201 Blast hits to 17322 proteins in 780 species: Archae - 12; Bacteria - 1396; Metazoa - 17338; Fungi - 3422; Plants - 5037; Viruses - 0; Other Eukaryotes - 2996 (source: NCBI BLink). | chr5:3377817-3378020 FORWARD LENGTH=67	1e-20	78.57	GO:0006612 GO:0006944 GO:0008150 GO:0010286 GO:0010363 GO:0030968 GO:0043069	protein targeting to membrane; cellular membrane fusion; biological process; heat acclimation; regulation of plant-type hypersensitive response; endoplasmic reticulum unfolded protein response; negative regulation of programmed cell death	NA	NA	GO:0005576 GO:0005739	extracellular region; mitochondrion	NA	NA	NA	NA	NA	NA	NA	NA	NA	NA
Glyma06g08080	178	UniRef100_I1K946 Uncharacterized protein n=1 Tax=Glycine max RepID=I1K946_SOYBN	1e-119	93.82	UniRef100_D7M2Z8 Protein tyrosine phosphatase (Fragment) n=1 Tax=Arabidopsis lyrata subsp. lyrata RepID=D7M2Z8_ARALL	1e-65	94.94	AT5G10700.1 | Symbols: | Peptidyl-tRNA hydrolase II (PTH2) family protein | chr5:3378053-3378867 REVERSE LENGTH=200	8e-68	94.94	GO:0006470	protein dephosphorylation	GO:0004045 GO:0004725	aminoacyl-tRNA hydrolase activity; protein tyrosine phosphatase activity	NA	NA	PF01981	Peptidyl-tRNA hydrolase PTH2	PTHR11717 PTHR11717:SF2	LOW MOLECULAR WEIGHT PROTEIN TYROSINE PHOSPHATASE; PHOSPHOTYROSINE PROTEIN PHOSPHATASE	KOG3305	Uncharacterized_conserved_protein	NA	NA	NA	NA
Glyma06g08090	37	NA	NA	NA	NA	NA	NA	NA	NA	NA	NA	NA	NA	NA	NA	NA	NA	NA	NA	NA	NA	NA	NA	NA	NA	NA
Glyma06g08100	253	UniRef100_I1K947 Uncharacterized protein n=1 Tax=Glycine max RepID=I1K947_SOYBN	5e-179	99.6	UniRef100_Q9SJB0 Expressed protein n=1 Tax=Arabidopsis thaliana RepID=Q9SJB0_ARATH	2e-21	32.81	AT5G24890.1 | Symbols: | unknown protein; FUNCTIONS IN: molecular_function unknown; INVOLVED IN: biological_process unknown; LOCATED IN: cellular_component unknown; EXPRESSED IN: 24 plant structures; EXPRESSED DURING: 13 growth stages; BEST Arabidopsis thaliana protein match is: unknown protein (TAIR:AT2G24550.1); Has 1807 Blast hits to 1807 proteins in 277 species: Archae - 0; Bacteria - 0; Meta…	7e-28	65.61	GO:0008150	biological process	GO:0003674	molecular function	GO:0005634	nucleus	NA	NA	NA	NA	NA	NA	NA	NA	NA	NA
Glyma06g08110	693	UniRef100_UPI000233A18D UPI000233A18D related cluster n=1 Tax=unknown RepID=UPI000233A18D	0	99.86	UniRef100_D7M6N7 Cyclic nucleotide-gated ion channel 18 n=1 Tax=Arabidopsis lyrata subsp. lyrata RepID=D7M6N7_ARALL	0	98.56	AT5G14870.1 | Symbols: CNGC18, ATCNGC18 | cyclic nucleotide-gated channel 18 | chr5:4808268-4810897 REVERSE LENGTH=706	0	98.56	GO:0006874 GO:0009827 GO:0009860 GO:0048610 GO:0048868	cellular calcium ion homeostasis; plant-type cell wall modification; pollen tube growth; cellular process involved in reproduction; pollen tube development	GO:0005216 GO:0005516 GO:0030551	ion channel activity; calmodulin binding; cyclic nucleotide binding	GO:0005886 GO:0016324	plasma membrane; apical plasma membrane	PF00520 PF00027	Ion transport protein; Cyclic nucleotide-binding domain	PTHR10217 PTHR10217:SF7	VOLTAGE AND LIGAND GATED POTASSIUM CHANNEL; POTASSIUM CHANNEL PROTEIN EAG-RELATED	KOG0498	K+-channel_ERG_and_related_proteins,_contain_PAS/PAC_sensor_domain	NA	NA	K05391	cyclic_nucleotide_gated_channel,_other_eukaryote
Glyma06g08120	301	UniRef100_B0LUR5 Transcription factor n=1 Tax=Glycine max RepID=B0LUR5_SOYBN	0	99.67	UniRef100_B0LUR5 Transcription factor n=1 Tax=Glycine max RepID=B0LUR5_SOYBN	0	99.67	AT4G31550.1 | Symbols: WRKY11, ATWRKY11 | WRKY DNA-binding protein 11 | chr4:15290065-15291458 REVERSE LENGTH=325	1e-124	96.35	GO:0002679 GO:0006355 GO:0010200 GO:0035556 GO:0042742	respiratory burst involved in defense response; regulation of transcription, DNA-dependent; response to chitin; intracellular signal transduction; defense response to bacterium	GO:0003700 GO:0005516 GO:0043565	sequence-specific DNA binding transcription factor activity; calmodulin binding; sequence-specific DNA binding	GO:0005634	nucleus	PF10533 PF03106	Plant zinc cluster domain; WRKY DNA -binding domain	NA	NA	NA	NA	NA	NA	NA	NA
Glyma06g08130	47	NA	NA	NA	NA	NA	NA	NA	NA	NA	NA	NA	NA	NA	NA	NA	NA	NA	NA	NA	NA	NA	NA	NA	NA	NA
Glyma06g08140	40	NA	NA	NA	NA	NA	NA	NA	NA	NA	NA	NA	NA	NA	NA	NA	NA	NA	NA	NA	NA	NA	NA	NA	NA	NA
Glyma06g08150	30	UniRef100_B9MX99 Predicted protein n=1 Tax=Populus trichocarpa RepID=B9MX99_POPTR	4e-06	96.67	NA	NA	NA	NA	NA	NA	NA	NA	NA	NA	NA	NA	NA	NA	NA	NA	NA	NA	NA	NA	NA	NA
Glyma06g08160	37	UniRef100_G7I4Y8 U-box domain-containing protein (Fragment) n=1 Tax=Medicago truncatula RepID=G7I4Y8_MEDTR	7e-08	97.3	UniRef100_G7I4Y8 U-box domain-containing protein (Fragment) n=1 Tax=Medicago truncatula RepID=G7I4Y8_MEDTR	7e-08	97.3	NA	NA	NA	NA	NA	NA	NA	NA	NA	NA	NA	NA	NA	NA	NA	NA	NA	NA	NA
Glyma06g08170	727	UniRef100_UPI000233A18E UPI000233A18E related cluster n=1 Tax=unknown RepID=UPI000233A18E	0	98.49	UniRef100_G7J2T6 Cyclic nucleotide-gated channel n=1 Tax=Medicago truncatula RepID=G7J2T6_MEDTR	0	99.72	AT2G24610.1 | Symbols: ATCNGC14, CNGC14 | cyclic nucleotide-gated channel 14 | chr2:10457105-10460351 FORWARD LENGTH=726	0	99.31	GO:0006811 GO:0006813 GO:0009744 GO:0009749 GO:0009750 GO:0055085	ion transport; potassium ion transport; response to sucrose stimulus; response to glucose stimulus; response to fructose stimulus; transmembrane transport	GO:0005216 GO:0005249 GO:0005516 GO:0030551	ion channel activity; voltage-gated potassium channel activity; calmodulin binding; cyclic nucleotide binding	GO:0005886 GO:0016020	plasma membrane; membrane	PF00027 PF00520	Cyclic nucleotide-binding domain; Ion transport protein	PTHR10217 PTHR10217:SF7	VOLTAGE AND LIGAND GATED POTASSIUM CHANNEL; POTASSIUM CHANNEL PROTEIN EAG-RELATED	KOG0498	K+-channel_ERG_and_related_proteins,_contain_PAS/PAC_sensor_domain	NA	NA	K05391	cyclic_nucleotide_gated_channel,_other_eukaryote
Glyma06g08180	694	UniRef100_I1K952 Uncharacterized protein n=1 Tax=Glycine max RepID=I1K952_SOYBN	0	99.86	UniRef100_B9RNP7 Transferase, transferring glycosyl groups, putative n=1 Tax=Ricinus communis RepID=B9RNP7_RICCO	0	99.86	AT4G31590.1 | Symbols: ATCSLC05, CSLC05, ATCSLC5, CSLC5 | Cellulose-synthase-like C5 | chr4:15309889-15312336 REVERSE LENGTH=692	0	99.86	GO:0042546	cell wall biogenesis	GO:0016757 GO:0016759	transferase activity, transferring glycosyl groups; cellulose synthase activity	GO:0005634 GO:0005794	nucleus; Golgi apparatus	PF00535	Glycosyl transferase family 2	PTHR10587 PTHR10587:SF18	N-ACETYLGLUCOSAMINYLTRANSFERASE-RELATED; N-ACETYLGLUCOSAMINYLTRANSFERASE-RELATED	NA	NA	NA	NA	NA	NA
Glyma06g08190	324	UniRef100_C6TCV8 Uncharacterized protein n=1 Tax=Glycine max RepID=C6TCV8_SOYBN	0	99.69	UniRef100_G7J2T9 UDP-sugar transporter sqv-7 n=1 Tax=Medicago truncatula RepID=G7J2T9_MEDTR	0	99.69	AT4G31600.1 | Symbols: | UDP-N-acetylglucosamine (UAA) transporter family | chr4:15315232-15316909 REVERSE LENGTH=323	0	99.69	GO:0015785 GO:0015786 GO:0048527 GO:0080147	UDP-galactose transport; UDP-glucose transport; lateral root development; root hair cell development	GO:0005459 GO:0005460	UDP-galactose transmembrane transporter activity; UDP-glucose transmembrane transporter activity	GO:0005794 GO:0005886 GO:0016020	Golgi apparatus; plasma membrane; membrane	PF08449	UAA transporter family	PTHR11132	SOLUTE CARRIER FAMILY 35	KOG1444	Nucleotide-sugar_transporter_VRG4/SQV-7	NA	NA	NA	NA
Glyma06g08200	436	UniRef100_I1K956 Uncharacterized protein n=1 Tax=Glycine max RepID=I1K956_SOYBN	0	99.77	UniRef100_G7J2U1 RNA-binding protein n=2 Tax=Medicago truncatula RepID=G7J2U1_MEDTR	0	94.04	AT1G17370.1 | Symbols: UBP1B | oligouridylate binding protein 1B | chr1:5951842-5954825 REVERSE LENGTH=419	0	94.27	NA	NA	GO:0000166 GO:0003676 GO:0003730	nucleotide binding; nucleic acid binding; mRNA 3'-UTR binding	NA	NA	PF00076	RNA recognition motif. (a.k.a. RRM, RBD, or RNP domain)	PTHR24012 PTHR24012:SF210	FAMILY NOT NAMED;	KOG0148	Apoptosis-promoting_RNA-binding_protein_TIA-1/TIAR_(RRM_superfamily)	NA	NA	NA	NA
Glyma06g08210	785	UniRef100_UPI000233A18F UPI000233A18F related cluster n=1 Tax=unknown RepID=UPI000233A18F	0	99.87	UniRef100_G7J2U3 U-box domain-containing protein n=1 Tax=Medicago truncatula RepID=G7J2U3_MEDTR	0	94.52	AT2G24370.1 | Symbols: | Protein kinase protein with adenine nucleotide alpha hydrolases-like domain | chr2:10369979-10373063 REVERSE LENGTH=788	0	98.34	GO:0002238 GO:0006468	response to molecule of fungal origin; protein phosphorylation	GO:0004672 GO:0004674 GO:0005524 GO:0016301 GO:0016772	protein kinase activity; protein serine/threonine kinase activity; ATP binding; kinase activity; transferase activity, transferring phosphorus-containing groups	GO:0005886	plasma membrane	PF00069 PF00582	Protein kinase domain; Universal stress protein family	PTHR24420 PTHR24420:SF203	FAMILY NOT NAMED; SUBFAMILY NOT NAMED	KOG1187	Serine/threonine_protein_kinase	NA	NA	NA	NA
Glyma06g08220	390	UniRef100_I1K958 Uncharacterized protein n=1 Tax=Glycine max RepID=I1K958_SOYBN	0	99.74	UniRef100_G7J2U5 Nucleoredoxin n=2 Tax=Medicago truncatula RepID=G7J2U5_MEDTR	0	99.74	AT4G31240.2 | Symbols: | protein kinase C-like zinc finger protein | chr4:15176637-15177986 REVERSE LENGTH=392	1e-171	97.69	GO:0016036 GO:0019375 GO:0045892 GO:0055114	cellular response to phosphate starvation; galactolipid biosynthetic process; negative regulation of transcription, DNA-dependent; oxidation-reduction process	GO:0016209 GO:0016491 GO:0047134	antioxidant activity; oxidoreductase activity; protein-disulfide reductase activity	GO:0005634	nucleus	PF07649 PF00578	C1-like domain; AhpC/TSA family	PTHR13871 PTHR13871:SF2	THIOREDOXIN; THIOREDOXIN - RELATED	KOG2501	Thioredoxin,_nucleoredoxin_and_related_proteins	NA	NA	NA	NA
Glyma06g08230	276	UniRef100_I1K961 Uncharacterized protein n=1 Tax=Glycine max RepID=I1K961_SOYBN	0	99.64	UniRef100_A8MRG8 Ribonuclease H2 subunit B n=1 Tax=Arabidopsis thaliana RepID=A8MRG8_ARATH	4e-111	98.55	AT4G20325.1 | Symbols: | FUNCTIONS IN: molecular_function unknown; INVOLVED IN: biological_process unknown; LOCATED IN: nucleus; CONTAINS InterPro DOMAIN/s: Ribonuclease H2, subunit B (InterPro:IPR019024); Has 30201 Blast hits to 17322 proteins in 780 species: Archae - 12; Bacteria - 1396; Metazoa - 17338; Fungi - 3422; Plants - 5037; Viruses - 0; Other Eukaryotes - 2996 (source: NCBI BLink). | c…	9e-114	98.55	NA	NA	NA	NA	NA	NA	PF09468	Ydr279p protein family (RNase H2 complex component)	PTHR13383 PTHR13383:SF10	FAMILY NOT NAMED; SUBFAMILY NOT NAMED	KOG4705	Uncharacterized_conserved_protein	NA	NA	K10744	ribonuclease_H2_subunit_B
Glyma06g08240	438	UniRef100_I1K962 Uncharacterized protein n=1 Tax=Glycine max RepID=I1K962_SOYBN	0	99.77	UniRef100_D7LAY2 Extracellular ligand-gated ion channel n=1 Tax=Arabidopsis lyrata subsp. lyrata RepID=D7LAY2_ARALL	8e-78	96.12	AT2G21080.1 | Symbols: | unknown protein; FUNCTIONS IN: molecular_function unknown; INVOLVED IN: biological_process unknown; LOCATED IN: vacuole; EXPRESSED IN: 15 plant structures; EXPRESSED DURING: 9 growth stages; CONTAINS InterPro DOMAIN/s: Protein of unknown function DUF3537 (InterPro:IPR021924); BEST Arabidopsis thaliana protein match is: Protein of unknown function (DUF3537) (TAIR:AT3G20300…	1e-152	93.61	GO:0008150	biological process	GO:0003674	molecular function	GO:0005739 GO:0005773	mitochondrion; vacuole	PF12056	Protein of unknown function (DUF3537)	NA	NA	NA	NA	NA	NA	NA	NA
Glyma06g08250	225	UniRef100_I1K963 Uncharacterized protein n=1 Tax=Glycine max RepID=I1K963_SOYBN	1e-165	99.56	UniRef100_G7J2V4 Cation transport regulator-like protein n=1 Tax=Medicago truncatula RepID=G7J2V4_MEDTR	2e-137	99.11	AT4G31290.1 | Symbols: | ChaC-like family protein | chr4:15186851-15188278 FORWARD LENGTH=227	9e-114	99.56	GO:0008150	biological process	GO:0003674	molecular function	GO:0005737	cytoplasm	PF04752	ChaC-like protein	PTHR12192	CATION TRANSPORT PROTEIN CHAC-RELATED	KOG3182	Predicted_cation_transporter	NA	NA	NA	NA
Glyma06g08260	234	UniRef100_I1K964 Proteasome subunit beta type n=1 Tax=Glycine max RepID=I1K964_SOYBN	2e-170	99.57	UniRef100_I1K964 Proteasome subunit beta type n=1 Tax=Glycine max RepID=I1K964_SOYBN	2e-170	99.57	AT4G31300.3 | Symbols: PBA1 | N-terminal nucleophile aminohydrolases (Ntn hydrolases) superfamily protein | chr4:15188927-15190935 FORWARD LENGTH=233	1e-149	99.57	GO:0006096 GO:0006511 GO:0006635 GO:0006833 GO:0006972 GO:0007030 GO:0009266 GO:0009407 GO:0009651 GO:0010043 GO:0010363 GO:0043161 GO:0043248 GO:0046686 GO:0051603 GO:0051788 GO:0080129	glycolysis; ubiquitin-dependent protein catabolic process; fatty acid beta-oxidation; water transport; hyperosmotic response; Golgi organization; response to temperature stimulus; toxin catabolic process; response to salt stress; response to zinc ion; regulation of plant-type hypersensitive response; proteasomal ubiquitin-dependent protein catabolic process; proteasome assembly; response to cadmi…	GO:0004175 GO:0004298 GO:0008233	endopeptidase activity; threonine-type endopeptidase activity; peptidase activity	GO:0000502 GO:0005737 GO:0005773 GO:0005774 GO:0005829 GO:0005839	proteasome complex; cytoplasm; vacuole; vacuolar membrane; cytosol; proteasome core complex	PF00227	Proteasome subunit	PTHR11599 PTHR11599:SF4	PROTEASOME SUBUNIT ALPHA/BETA; PROTEASOME BETA SUBUNIT	KOG0174	20S_proteasome,_regulatory_subunit_beta_type_PSMB6/PSMB9/PRE3	3.4.25.1	Proteasome_endopeptidase_complex	K02738	20S_proteasome_subunit_beta_1_[EC:3.4.25.1]
Glyma06g08270	176	UniRef100_C6T4K7 Uncharacterized protein n=1 Tax=Glycine max RepID=C6T4K7_SOYBN	1e-126	99.43	UniRef100_B4FVZ7 AIG2-like protein n=1 Tax=Zea mays RepID=B4FVZ7_MAIZE	1e-70	88.64	AT2G24390.1 | Symbols: | AIG2-like (avirulence induced gene) family protein | chr2:10373796-10374654 FORWARD LENGTH=152	4e-60	81.25	GO:0008150	biological process	GO:0003674	molecular function	GO:0005634	nucleus	PF06094	AIG2-like family	NA	NA	NA	NA	NA	NA	NA	NA
Glyma06g08280	61	NA	NA	NA	NA	NA	NA	NA	NA	NA	NA	NA	NA	NA	NA	NA	NA	NA	NA	NA	NA	NA	NA	NA	NA	NA
Glyma06g08290	213	UniRef100_I1K966 Oleosin n=1 Tax=Glycine max RepID=I1K966_SOYBN	3e-114	77.93	UniRef100_I1K966 Oleosin n=1 Tax=Glycine max RepID=I1K966_SOYBN	3e-114	77.93	AT2G25890.1 | Symbols: | Oleosin family protein | chr2:11037435-11037884 FORWARD LENGTH=149	3e-36	51.64	GO:0010162 GO:0019915	seed dormancy process; lipid storage	GO:0003674	molecular function	GO:0012511 GO:0016020 GO:0016021	monolayer-surrounded lipid storage body; membrane; integral to membrane	PF01277	Oleosin	NA	NA	NA	NA	NA	NA	NA	NA
Glyma06g08300	172	UniRef100_I1K967 Uncharacterized protein n=1 Tax=Glycine max RepID=I1K967_SOYBN	3e-119	99.42	NA	NA	NA	NA	NA	NA	NA	NA	NA	NA	NA	NA	NA	NA	NA	NA	NA	NA	NA	NA	NA	NA
Glyma06g08320	36	NA	NA	NA	NA	NA	NA	NA	NA	NA	NA	NA	NA	NA	NA	NA	NA	NA	NA	NA	NA	NA	NA	NA	NA	NA
Glyma06g08330	73	NA	NA	NA	NA	NA	NA	NA	NA	NA	NA	NA	NA	NA	NA	NA	NA	NA	NA	NA	NA	NA	NA	NA	NA	NA
Glyma06g08340	172	UniRef100_I1K968 Uncharacterized protein n=1 Tax=Glycine max RepID=I1K968_SOYBN	1e-122	99.42	UniRef100_G7J2U8 Auxin-induced protein 6B n=1 Tax=Medicago truncatula RepID=G7J2U8_MEDTR	1e-98	99.42	AT4G31320.1 | Symbols: | SAUR-like auxin-responsive protein family | chr4:15193993-15194562 REVERSE LENGTH=189	7e-54	97.09	GO:0009733	response to auxin stimulus	GO:0005516	calmodulin binding	GO:0005634	nucleus	PF02519	Auxin responsive protein	NA	NA	NA	NA	NA	NA	K14488	SAUR_family_protein
Glyma06g08350	62	NA	NA	NA	NA	NA	NA	NA	NA	NA	NA	NA	NA	NA	NA	NA	NA	NA	NA	NA	NA	NA	NA	NA	NA	NA
Glyma06g08360	235	UniRef100_I1K969 Uncharacterized protein n=1 Tax=Glycine max RepID=I1K969_SOYBN	1e-170	99.57	UniRef100_Q9LXB0 AT5g10580/F12B17_70 n=1 Tax=Arabidopsis thaliana RepID=Q9LXB0_ARATH	1e-113	97.87	AT4G31330.1 | Symbols: | Protein of unknown function, DUF599 | chr4:15202354-15203151 FORWARD LENGTH=239	5e-118	96.17	GO:0008150	biological process	GO:0003674	molecular function	GO:0005739	mitochondrion	PF04654	Protein of unknown function, DUF599	NA	NA	NA	NA	NA	NA	NA	NA
Glyma06g08380	423	UniRef100_I1K970 Uncharacterized protein n=2 Tax=Glycine max RepID=I1K970_SOYBN	0	99.76	UniRef100_G7J2W0 26S proteasome non-ATPase regulatory subunit n=3 Tax=Medicago truncatula RepID=G7J2W0_MEDTR	0	99.76	AT1G29150.1 | Symbols: ATS9, RPN6 | non-ATPase subunit 9 | chr1:10181240-10182499 FORWARD LENGTH=419	0	98.11	GO:0006457 GO:0006511 GO:0009408 GO:0009644 GO:0030163 GO:0034976 GO:0042023 GO:0042542 GO:0043161 GO:0043248 GO:0046686 GO:0051510 GO:0051604 GO:0051788 GO:0080129	protein folding; ubiquitin-dependent protein catabolic process; response to heat; response to high light intensity; protein catabolic process; response to endoplasmic reticulum stress; DNA endoreduplication; response to hydrogen peroxide; proteasomal ubiquitin-dependent protein catabolic process; proteasome assembly; response to cadmium ion; regulation of unidimensional cell growth; protein matur…	NA	NA	GO:0000502 GO:0005634 GO:0005829 GO:0008541 GO:0009506 GO:0009507	proteasome complex; nucleus; cytosol; proteasome regulatory particle, lid subcomplex; plasmodesma; chloroplast	PF01399	PCI domain	PTHR10678	26S PROTEASOME SUBUNIT S9	KOG1463	26S_proteasome_regulatory_complex,_subunit_RPN6/PSMD11	NA	NA	K03036	26S_proteasome_regulatory_subunit_N6
Glyma06g08390	289	UniRef100_Q0GPH5 BZIP transcription factor bZIP62 n=2 Tax=Glycine max RepID=Q0GPH5_SOYBN	0	99.65	UniRef100_Q0GPH5 BZIP transcription factor bZIP62 n=2 Tax=Glycine max RepID=Q0GPH5_SOYBN	0	99.65	AT5G24800.1 | Symbols: ATBZIP9, BZO2H2, BZIP9 | basic leucine zipper 9 | chr5:8515259-8516541 FORWARD LENGTH=277	3e-57	87.2	GO:0006355 GO:0071333	regulation of transcription, DNA-dependent; cellular response to glucose stimulus	GO:0003677 GO:0003700 GO:0005515 GO:0042803 GO:0043565 GO:0046982 GO:0046983	DNA binding; sequence-specific DNA binding transcription factor activity; protein binding; protein homodimerization activity; sequence-specific DNA binding; protein heterodimerization activity; protein dimerization activity	GO:0005634	nucleus	PF12498 PF00170	Basic leucine-zipper C terminal; bZIP transcription factor	PTHR22952 PTHR22952:SF6	CAMP-RESPONSE ELEMENT BINDING PROTEIN-RELATED; CAMP-RESPONSE ELEMENT BINDING PROTEIN-RELATED	NA	NA	NA	NA	NA	NA
Glyma06g08400	179	UniRef100_I1K973 Uncharacterized protein n=1 Tax=Glycine max RepID=I1K973_SOYBN	8e-124	99.44	UniRef100_G7J2W3 Calcium-binding protein CML42 n=1 Tax=Medicago truncatula RepID=G7J2W3_MEDTR	9e-60	99.44	AT4G20780.1 | Symbols: CML42 | calmodulin like 42 | chr4:11133309-11133884 REVERSE LENGTH=191	4e-15	35.2	GO:0010091	trichome branching	GO:0005509 GO:0005515	calcium ion binding; protein binding	NA	NA	PF00036	EF hand	PTHR10891 PTHR10891:SF43	CALMODULIN; CALMODULIN RELATED	NA	NA	NA	NA	NA	NA
Glyma06g08410	31	NA	NA	NA	NA	NA	NA	NA	NA	NA	NA	NA	NA	NA	NA	NA	NA	NA	NA	NA	NA	NA	NA	NA	NA	NA
Glyma06g08430	447	UniRef100_I1K974 Uncharacterized protein n=1 Tax=Glycine max RepID=I1K974_SOYBN	0	99.78	UniRef100_Q8GUN1 AT4G31340 protein n=1 Tax=Arabidopsis thaliana RepID=Q8GUN1_ARATH	1e-159	93.29	AT4G31340.1 | Symbols: | myosin heavy chain-related | chr4:15205662-15208950 FORWARD LENGTH=437	3e-162	93.29	GO:0006007 GO:0042732	glucose catabolic process; D-xylose metabolic process	NA	NA	GO:0005774 GO:0005783 GO:0005794	vacuolar membrane; endoplasmic reticulum; Golgi apparatus	NA	NA	NA	NA	KOG1003	Actin_filament-coating_protein_tropomyosin	NA	NA	NA	NA
Glyma06g08440	356	UniRef100_I1K975 Uncharacterized protein n=1 Tax=Glycine max RepID=I1K975_SOYBN	0	94.94	UniRef100_B9SPR1 Transcription factor, putative n=1 Tax=Ricinus communis RepID=B9SPR1_RICCO	1e-162	93.54	AT2G24430.2 | Symbols: ANAC039 | NAC domain containing protein 38 | chr2:10383517-10386386 REVERSE LENGTH=316	3e-110	93.82	GO:0006355 GO:0007275	regulation of transcription, DNA-dependent; multicellular organismal development	GO:0003677 GO:0003700	DNA binding; sequence-specific DNA binding transcription factor activity	GO:0005634	nucleus	PF02365	No apical meristem (NAM) protein	NA	NA	NA	NA	NA	NA	NA	NA
Glyma06g08450	256	UniRef100_I1K976 Uncharacterized protein n=2 Tax=Glycine max RepID=I1K976_SOYBN	0	99.61	UniRef100_B9SUG0 tRNA (Guanine-n(7)-)-methyltransferase, putative n=1 Tax=Ricinus communis RepID=B9SUG0_RICCO	9e-161	98.05	AT5G24840.1 | Symbols: | tRNA (guanine-N-7) methyltransferase | chr5:8533897-8534652 REVERSE LENGTH=251	2e-144	94.14	GO:0006400 GO:0006626 GO:0009165 GO:0015946 GO:0019415	tRNA modification; protein targeting to mitochondrion; nucleotide biosynthetic process; methanol oxidation; acetate biosynthetic process from carbon monoxide	GO:0008176	tRNA (guanine-N7-)-methyltransferase activity	GO:0005634	nucleus	PF02390	Putative methyltransferase	PTHR23417 PTHR23417:SF1	3-DEOXY-D-MANNO-OCTULOSONIC-ACID TRANSFERASE/TRNA (GUANINE-N(7)-)-METHYLTRANSFERASE; TRNA (GUANINE-N(7)-)-METHYLTRANSFERASE	KOG3115	Methyltransferase-like_protein	2.1.1.33	tRNA_(guanine-N7-)-methyltransferase	K03439	tRNA_(guanine-N7-)-methyltransferase_[EC:2.1.1.33]
Glyma06g08480	404	UniRef100_I1K978 Uncharacterized protein n=2 Tax=Glycine max RepID=I1K978_SOYBN	0	99.75	UniRef100_G7J2X1 Serine/threonine protein kinase AFC3 n=1 Tax=Medicago truncatula RepID=G7J2X1_MEDTR	0	97.77	AT4G32660.3 | Symbols: AME3 | Protein kinase superfamily protein | chr4:15756420-15759107 FORWARD LENGTH=392	0	97.77	GO:0006468 GO:0045727 GO:0046777	protein phosphorylation; positive regulation of translation; protein autophosphorylation	GO:0004672 GO:0004674 GO:0004713 GO:0005524 GO:0016301 GO:0016772	protein kinase activity; protein serine/threonine kinase activity; protein tyrosine kinase activity; ATP binding; kinase activity; transferase activity, transferring phosphorus-containing groups	GO:0005634 GO:0005737	nucleus; cytoplasm	PF00069	Protein kinase domain	PTHR24058 PTHR24058:SF30	DUAL SPECIFICITY PROTEIN KINASE;	KOG0659 KOG0671	Cdk_activating_kinase_(CAK)/RNA_polymerase_II_transcription_initiation/nucleotide_excision_repair_factor_TFIIH/TFIIK,_kinase_subunit_CDK7 LAMMER_dual_specificity_kinases	NA	NA	NA	NA
Glyma06g08490	44	NA	NA	NA	NA	NA	NA	NA	NA	NA	NA	NA	NA	NA	NA	NA	NA	NA	NA	NA	NA	NA	NA	NA	NA	NA
Glyma06g08520	712	UniRef100_UPI000233A305 UPI000233A305 related cluster n=1 Tax=unknown RepID=UPI000233A305	0	99.86	UniRef100_Q9C824 BZIP protein, putative; 48652-45869 n=1 Tax=Arabidopsis thaliana RepID=Q9C824_ARATH	0	98.31	AT5G25590.1 | Symbols: | Protein of unknown function (DUF630 and DUF632) | chr5:8906684-8909847 REVERSE LENGTH=775	0	99.86	GO:0006306 GO:0006346 GO:0006499 GO:0008356 GO:0009909 GO:0016570 GO:0031047 GO:0031048 GO:0048449 GO:0051567	DNA methylation; methylation-dependent chromatin silencing; N-terminal protein myristoylation; asymmetric cell division; regulation of flower development; histone modification; gene silencing by RNA; chromatin silencing by small RNA; floral organ formation; histone H3-K9 methylation	NA	NA	GO:0005634	nucleus	PF04782 PF04783	Protein of unknown function (DUF632); Protein of unknown function (DUF630)	PTHR21450	UNCHARACTERIZED	NA	NA	NA	NA	NA	NA
Glyma06g08530	657	UniRef100_I1K982 Uncharacterized protein n=1 Tax=Glycine max RepID=I1K982_SOYBN	0	98.02	UniRef100_F4JXV7 Bromo-adjacent homology (BAH) domain-containing protein n=1 Tax=Arabidopsis thaliana RepID=F4JXV7_ARATH	1e-49	28.92	AT5G11470.1 | Symbols: | bromo-adjacent homology (BAH) domain-containing protein | chr5:3662757-3667041 REVERSE LENGTH=757	3e-52	28.92	GO:0006333 GO:0008150	chromatin assembly or disassembly; biological process	GO:0003676 GO:0003677	nucleic acid binding; DNA binding	GO:0005634	nucleus	PF01426	BAH domain	NA	NA	NA	NA	NA	NA	NA	NA
Glyma06g08540	344	UniRef100_C6TI21 Uncharacterized protein n=1 Tax=Glycine max RepID=C6TI21_SOYBN	0	99.71	UniRef100_B9VSG5 BURP domain protein n=1 Tax=Glycine max RepID=B9VSG5_SOYBN	0	99.71	AT5G25610.1 | Symbols: RD22, ATRD22 | BURP domain-containing protein | chr5:8914498-8916684 REVERSE LENGTH=392	4e-124	98.84	GO:0009269 GO:0009409 GO:0009651 GO:0009737	response to desiccation; response to cold; response to salt stress; response to abscisic acid stimulus	GO:0045735	nutrient reservoir activity	GO:0005576 GO:0005768 GO:0005794 GO:0005802	extracellular region; endosome; Golgi apparatus; trans-Golgi network	PF03181	BURP domain	NA	NA	NA	NA	NA	NA	NA	NA
Glyma06g08550	125	UniRef100_B9SMG4 Putative uncharacterized protein n=1 Tax=Ricinus communis RepID=B9SMG4_RICCO	6e-07	69.6	NA	NA	NA	NA	NA	NA	NA	NA	NA	NA	NA	NA	NA	NA	NA	NA	NA	NA	NA	NA	NA	NA
Glyma06g08560	441	UniRef100_I1JUR3 Uncharacterized protein n=2 Tax=Glycine max RepID=I1JUR3_SOYBN	0	91.16	UniRef100_G7J3E6 Dimethylaniline monooxygenase n=1 Tax=Medicago truncatula RepID=G7J3E6_MEDTR	0	96.6	AT5G25620.1 | Symbols: YUC6 | Flavin-binding monooxygenase family protein | chr5:8935520-8938224 REVERSE LENGTH=417	0	94.33	GO:0009851 GO:0055114	auxin biosynthetic process; oxidation-reduction process	GO:0004497 GO:0004499 GO:0016491 GO:0050660 GO:0050661	monooxygenase activity; N,N-dimethylaniline monooxygenase activity; oxidoreductase activity; flavin adenine dinucleotide binding; NADP binding	NA	NA	PF00743	Flavin-binding monooxygenase-like	PTHR23023 PTHR23023:SF5	DIMETHYLANILINE MONOOXYGENASE; MONOOXYGENASE	KOG1399	Flavin-containing_monooxygenase	1.14.13.-	With_NADH_or_NADPH_as_one_donor,_and_incorporation_of_one_atom	K11816	YUCCA_family_monooxygenase_[EC:1.14.13.-]
Glyma06g08570	477	UniRef100_UPI000233A308 UPI000233A308 related cluster n=1 Tax=unknown RepID=UPI000233A308	0	99.79	UniRef100_G7LE23 30S ribosomal protein S5 n=1 Tax=Medicago truncatula RepID=G7LE23_MEDTR	0	99.79	AT1G64880.1 | Symbols: | Ribosomal protein S5 family protein | chr1:24105713-24108780 FORWARD LENGTH=515	2e-169	89.1	GO:0006412 GO:0009220	translation; pyrimidine ribonucleotide biosynthetic process	GO:0003723 GO:0003735	RNA binding; structural constituent of ribosome	GO:0005622 GO:0005739 GO:0005768 GO:0005794 GO:0005802 GO:0005840	intracellular; mitochondrion; endosome; Golgi apparatus; trans-Golgi network; ribosome	PF00333 PF03719	Ribosomal protein S5, N-terminal domain; Ribosomal protein S5, C-terminal domain	PTHR13718 PTHR13718:SF2	RIBOSOMAL S SUBUNIT; 40S RIBOSOMAL PROTEIN S2	KOG2646	Ribosomal_protein_S5	NA	NA	NA	NA
Glyma06g08580	294	UniRef100_I1K986 Uncharacterized protein n=1 Tax=Glycine max RepID=I1K986_SOYBN	0	99.66	UniRef100_G7J3E8 Ribosome biogenesis GTP-binding protein YsxC n=1 Tax=Medicago truncatula RepID=G7J3E8_MEDTR	3e-153	99.66	AT5G11480.1 | Symbols: | P-loop containing nucleoside triphosphate hydrolases superfamily protein | chr5:3669350-3671471 REVERSE LENGTH=318	4e-147	99.66	GO:0000917 GO:0006364 GO:0006399 GO:0009658	barrier septum assembly; rRNA processing; tRNA metabolic process; chloroplast organization	GO:0005525	GTP binding	GO:0009507	chloroplast	PF01926	GTPase of unknown function	PTHR11649	MSS1/TRME-RELATED GTP-BINDING PROTEIN	KOG2486	Predicted_GTPase	NA	NA	NA	NA
Glyma06g08600	53	NA	NA	NA	NA	NA	NA	NA	NA	NA	NA	NA	NA	NA	NA	NA	NA	NA	NA	NA	NA	NA	NA	NA	NA	NA
Glyma06g08610	674	UniRef100_I1K988 Uncharacterized protein n=2 Tax=Glycine max RepID=I1K988_SOYBN	0	99.85	UniRef100_A1IGC6 PERK1-like protein kinase n=2 Tax=Nicotiana tabacum RepID=A1IGC6_TOBAC	6e-163	69.58	AT4G34440.1 | Symbols: | Protein kinase superfamily protein | chr4:16466008-16468748 FORWARD LENGTH=670	2e-160	65.13	GO:0006468 GO:0009827 GO:0009860 GO:0046777 GO:0048610 GO:0048868 GO:0051510	protein phosphorylation; plant-type cell wall modification; pollen tube growth; protein autophosphorylation; cellular process involved in reproduction; pollen tube development; regulation of unidimensional cell growth	GO:0004672 GO:0004674 GO:0005524 GO:0016301 GO:0016772	protein kinase activity; protein serine/threonine kinase activity; ATP binding; kinase activity; transferase activity, transferring phosphorus-containing groups	GO:0005886	plasma membrane	PF07714	Protein tyrosine kinase	PTHR24420 PTHR24420:SF822	FAMILY NOT NAMED;	KOG1187	Serine/threonine_protein_kinase	NA	NA	NA	NA
Glyma06g08620	342	UniRef100_I1K992 Uncharacterized protein n=1 Tax=Glycine max RepID=I1K992_SOYBN	0	99.71	UniRef100_B9SM25 Minor histocompatibility antigen H13, putative n=1 Tax=Ricinus communis RepID=B9SM25_RICCO	0	99.71	AT2G03120.1 | Symbols: ATSPP, SPP | signal peptide peptidase | chr2:937554-940083 FORWARD LENGTH=344	0	99.71	GO:0006499 GO:0009555 GO:0009846	N-terminal protein myristoylation; pollen development; pollen germination	GO:0004190	aspartic-type endopeptidase activity	GO:0005783 GO:0005789 GO:0016021	endoplasmic reticulum; endoplasmic reticulum membrane; integral to membrane	PF04258	Signal peptide peptidase	PTHR12174 PTHR12174:SF23	SIGNAL PEPTIDE PEPTIDASE; SIGNAL PEPTIDE PEPTIDASE	KOG2443	Uncharacterized_conserved_protein	3.4.23.-	Aspartic_endopeptidases	K09595	minor_histocompatibility_antigen_H13_[EC:3.4.23.-]
Glyma06g08630	478	UniRef100_I1K993 Uncharacterized protein n=1 Tax=Glycine max RepID=I1K993_SOYBN	0	99.79	UniRef100_Q6EQH5 Membrane protein-like n=1 Tax=Oryza sativa Japonica Group RepID=Q6EQH5_ORYSJ	0	89.12	AT2G25737.1 | Symbols: | Sulfite exporter TauE/SafE family protein | chr2:10977174-10979677 FORWARD LENGTH=476	0	98.95	NA	NA	NA	NA	GO:0009507 GO:0016021	chloroplast; integral to membrane	PF01925	Sulfite exporter TauE/SafE	PTHR14255	ATP-DEPENDENT PROTEASE (CEREBLON)	NA	NA	NA	NA	NA	NA
Glyma06g08640	216	UniRef100_I1K994 Uncharacterized protein n=1 Tax=Glycine max RepID=I1K994_SOYBN	1e-156	99.54	UniRef100_B9RS50 Coiled-coil domain-containing protein, putative n=1 Tax=Ricinus communis RepID=B9RS50_RICCO	9e-142	99.54	AT5G11500.1 | Symbols: | unknown protein; CONTAINS InterPro DOMAIN/s: Protein of unknown function DUF814 (InterPro:IPR008532); Has 1807 Blast hits to 1807 proteins in 277 species: Archae - 0; Bacteria - 0; Metazoa - 736; Fungi - 347; Plants - 385; Viruses - 0; Other Eukaryotes - 339 (source: NCBI BLink). | chr5:3676747-3678946 FORWARD LENGTH=215	1e-142	99.54	GO:0006623 GO:0008150 GO:0016192	protein targeting to vacuole; biological process; vesicle-mediated transport	GO:0003674	molecular function	GO:0005737	cytoplasm	PF05670	Domain of unknown function (DUF814)	PTHR13049	DUF814-RELATED	KOG3272	Predicted_coiled-coil_protein	NA	NA	NA	NA
Glyma06g08650	461	UniRef100_I1K995 Uncharacterized protein n=1 Tax=Glycine max RepID=I1K995_SOYBN	0	99.78	UniRef100_B9RS49 Lupus la ribonucleoprotein, putative n=1 Tax=Ricinus communis RepID=B9RS49_RICCO	4e-162	99.13	AT4G32720.2 | Symbols: AtLa1, La1 | La protein 1 | chr4:15787313-15789498 FORWARD LENGTH=404	9e-138	93.49	GO:0000085 GO:0000478 GO:0006396 GO:0006406 GO:0006606 GO:0009220 GO:0009561 GO:0009640 GO:0009790 GO:0010388 GO:0042254 GO:0048825 GO:0051301	G2 phase of mitotic cell cycle; endonucleolytic cleavage involved in rRNA processing; RNA processing; mRNA export from nucleus; protein import into nucleus; pyrimidine ribonucleotide biosynthetic process; megagametogenesis; photomorphogenesis; embryo development; cullin deneddylation; ribosome biogenesis; cotyledon development; cell division	GO:0000166 GO:0003676 GO:0003723	nucleotide binding; nucleic acid binding; RNA binding	GO:0005618 GO:0005634 GO:0005654 GO:0005829	cell wall; nucleus; nucleoplasm; cytosol	PF05383 PF00076 PF08777	La domain; RNA recognition motif. (a.k.a. RRM, RBD, or RNP domain); RNA binding motif	PTHR22792 PTHR22792:SF4	LUPUS LA RIBONUCLEOPROTEIN; RNA-BINDING PROTEIN-RELATED	KOG4213	RNA-binding_protein_La	NA	NA	NA	NA
Glyma06g08660	1000	UniRef100_UPI000233A30C UPI000233A30C related cluster n=1 Tax=unknown RepID=UPI000233A30C	0	99.9	UniRef100_G7ZWL9 C-myb-like transcription factor n=1 Tax=Medicago truncatula RepID=G7ZWL9_MEDTR	0	99.9	AT4G32730.2 | Symbols: PC-MYB1, MYB3R-1, ATMYB3R-1, ATMYB3R1 | Homeodomain-like protein | chr4:15791039-15795643 FORWARD LENGTH=995	0	99	GO:0000911 GO:0006355	cytokinesis by cell plate formation; regulation of transcription, DNA-dependent	GO:0003677 GO:0003700 GO:0003713	DNA binding; sequence-specific DNA binding transcription factor activity; transcription coactivator activity	GO:0005634	nucleus	PF00249	Myb-like DNA-binding domain	PTHR10641	MYB-RELATED	KOG0048	Transcription_factor,_Myb_superfamily	NA	NA	NA	NA
Glyma06g08670	457	UniRef100_O48548 Aspartate aminotransferase n=3 Tax=Glycine max RepID=O48548_SOYBN	0	99.78	UniRef100_O48548 Aspartate aminotransferase n=3 Tax=Glycine max RepID=O48548_SOYBN	0	99.78	AT5G11520.1 | Symbols: ASP3, YLS4 | aspartate aminotransferase 3 | chr5:3685257-3687721 REVERSE LENGTH=449	0	94.75	GO:0006520 GO:0006635 GO:0006807 GO:0009058 GO:0009407 GO:0009693 GO:0009735 GO:0010150 GO:0043161 GO:0043248 GO:0048767 GO:0051788 GO:0080129	cellular amino acid metabolic process; fatty acid beta-oxidation; nitrogen compound metabolic process; biosynthetic process; toxin catabolic process; ethylene biosynthetic process; response to cytokinin stimulus; leaf senescence; proteasomal ubiquitin-dependent protein catabolic process; proteasome assembly; root hair elongation; response to misfolded protein; proteasome core complex assembly	GO:0003824 GO:0004069 GO:0008483 GO:0016740 GO:0030170	catalytic activity; L-aspartate:2-oxoglutarate aminotransferase activity; transaminase activity; transferase activity; pyridoxal phosphate binding	GO:0005739 GO:0005777 GO:0009536 GO:0016020	mitochondrion; peroxisome; plastid; membrane	PF00155	Aminotransferase class I and II	PTHR11879	ASPARTATE AMINOTRANSFERASE	KOG1411	Aspartate_aminotransferase/Glutamic_oxaloacetic_transaminase_AAT1/GOT2	2.6.1.1	Aspartate_aminotransferase.	K00813	aspartate_aminotransferase_[EC:2.6.1.1]
Glyma06g08680	517	UniRef100_I1K9A0 Uncharacterized protein n=1 Tax=Glycine max RepID=I1K9A0_SOYBN	0	99.81	UniRef100_G7ZWE0 Eukaryotic translation initiation factor 3 subunit L n=1 Tax=Medicago truncatula RepID=G7ZWE0_MEDTR	0	99.81	AT5G25757.1 | Symbols: | RNA polymerase I-associated factor PAF67 | chr5:8965515-8967460 REVERSE LENGTH=514	0	98.45	GO:0008150	biological process	GO:0003674	molecular function	GO:0005737	cytoplasm	PF10255	RNA polymerase I-associated factor PAF67	PTHR13242	UNCHARACTERIZED	KOG3677	RNA_polymerase_I-associated_factor_-_PAF67	NA	NA	NA	NA
Glyma06g08690	293	UniRef100_I1K9A1 Uncharacterized protein n=1 Tax=Glycine max RepID=I1K9A1_SOYBN	0	99.66	NA	NA	NA	AT4G32750.1 | Symbols: | unknown protein; Has 30201 Blast hits to 17322 proteins in 780 species: Archae - 12; Bacteria - 1396; Metazoa - 17338; Fungi - 3422; Plants - 5037; Viruses - 0; Other Eukaryotes - 2996 (source: NCBI BLink). | chr4:15796415-15798091 REVERSE LENGTH=293	3e-149	99.32	GO:0008150	biological process	GO:0003674	molecular function	GO:0005737	cytoplasm	NA	NA	NA	NA	NA	NA	NA	NA	NA	NA
Glyma06g08700	346	UniRef100_I1K9A2 Uncharacterized protein n=1 Tax=Glycine max RepID=I1K9A2_SOYBN	0	99.71	UniRef100_B9RS41 D-alanine aminotransferase, putative n=1 Tax=Ricinus communis RepID=B9RS41_RICCO	1e-177	90.75	AT5G57850.1 | Symbols: | D-aminoacid aminotransferase-like PLP-dependent enzymes superfamily protein | chr5:23435548-23437287 REVERSE LENGTH=373	1e-152	95.38	GO:0008152 GO:0008153 GO:0046654	metabolic process; para-aminobenzoic acid biosynthetic process; tetrahydrofolate biosynthetic process	GO:0003824 GO:0008696	catalytic activity; 4-amino-4-deoxychorismate lyase activity	GO:0009507 GO:0009570	chloroplast; chloroplast stroma	PF01063	Aminotransferase class IV	PTHR11825 PTHR11825:SF6	SUBGROUP IIII AMINOTRANSFERASE; BRANCHED-CHAIN AMINO ACID AMINOTRANSFERASE RELATED	KOG0975	Branched_chain_aminotransferase_BCAT1,_pyridoxal_phosphate_enzymes_type_IV_superfamily	2.6.1.42	Branched-chain_amino_acid_aminotransferase	K00826	branched-chain_amino_acid_aminotransferase_[EC:2.6.1.42]
Glyma06g08710	667	UniRef100_I1K9A3 Uncharacterized protein n=1 Tax=Glycine max RepID=I1K9A3_SOYBN	0	99.85	UniRef100_Q2V732 VHS and GAT domain protein n=2 Tax=Glycine max RepID=Q2V732_SOYBN	0	99.85	AT4G32760.1 | Symbols: | ENTH/VHS/GAT family protein | chr4:15799376-15803832 FORWARD LENGTH=675	0	99.85	GO:0000902 GO:0006487 GO:0006623 GO:0006886 GO:0006891 GO:0006944 GO:0016049 GO:0016192 GO:0048193	cell morphogenesis; protein N-linked glycosylation; protein targeting to vacuole; intracellular protein transport; intra-Golgi vesicle-mediated transport; cellular membrane fusion; cell growth; vesicle-mediated transport; Golgi vesicle transport	GO:0008565	protein transporter activity	GO:0005622 GO:0005795 GO:0005886	intracellular; Golgi stack; plasma membrane	PF03127 PF00790	GAT domain; VHS domain	PTHR13856 PTHR13856:SF27	VHS DOMAIN CONTAINING PROTEIN FAMILY; TARGET OF MYB1 RELATED (TOM1 - RELATED)	KOG1087	Cytosolic_sorting_protein_GGA2/TOM1	NA	NA	NA	NA
Glyma06g08720	158	UniRef100_I1K9A6 Uncharacterized protein n=1 Tax=Glycine max RepID=I1K9A6_SOYBN	4e-114	99.37	UniRef100_F8RWT3 Protein binding/ubiquitin-protein ligase 4 n=1 Tax=Hevea brasiliensis RepID=F8RWT3_HEVBR	4e-112	99.37	AT5G25760.2 | Symbols: PEX4 | peroxin4 | chr5:8967983-8969173 FORWARD LENGTH=157	3e-111	99.37	GO:0006635 GO:0006661 GO:0007031 GO:0016558	fatty acid beta-oxidation; phosphatidylinositol biosynthetic process; peroxisome organization; protein import into peroxisome matrix	GO:0004842 GO:0005515 GO:0016881	ubiquitin-protein ligase activity; protein binding; acid-amino acid ligase activity	GO:0005634	nucleus	PF00179	Ubiquitin-conjugating enzyme	PTHR24067 PTHR24067:SF25	UBIQUITIN-CONJUGATING ENZYME E2;	KOG0417	Ubiquitin-protein_ligase	6.3.2.19	Ubiquitin--protein_ligase.	K10689	peroxin-4_[EC:6.3.2.19]
Glyma06g08730	363	UniRef100_I1K9A8 Uncharacterized protein n=2 Tax=Glycine max RepID=I1K9A8_SOYBN	0	99.72	UniRef100_B9RS30 Catalytic, putative n=1 Tax=Ricinus communis RepID=B9RS30_RICCO	0	97.52	AT5G25770.1 | Symbols: | alpha/beta-Hydrolases superfamily protein | chr5:8969308-8971389 REVERSE LENGTH=360	9e-166	95.59	GO:0008150 GO:0010260 GO:0046482	biological process; organ senescence; para-aminobenzoic acid metabolic process	NA	NA	GO:0009507	chloroplast	PF00326	Prolyl oligopeptidase family	PTHR17630 PTHR17630:SF20	DIENELACTONE HYDROLASE; CARBOXYMETHYLENEBUTENOLIDASE	NA	NA	NA	NA	NA	NA
Glyma06g08740	427	UniRef100_I1K9B3 Uncharacterized protein n=2 Tax=Glycine max RepID=I1K9B3_SOYBN	0	99.77	UniRef100_B9RS30 Catalytic, putative n=1 Tax=Ricinus communis RepID=B9RS30_RICCO	0	93.44	AT5G25770.1 | Symbols: | alpha/beta-Hydrolases superfamily protein | chr5:8969308-8971389 REVERSE LENGTH=360	3e-168	81.26	GO:0008150 GO:0010260 GO:0046482	biological process; organ senescence; para-aminobenzoic acid metabolic process	NA	NA	GO:0009507	chloroplast	PF00326	Prolyl oligopeptidase family	PTHR17630 PTHR17630:SF20	DIENELACTONE HYDROLASE; CARBOXYMETHYLENEBUTENOLIDASE	NA	NA	NA	NA	NA	NA
Glyma06g08750	404	UniRef100_UPI000233A30D UPI000233A30D related cluster n=1 Tax=unknown RepID=UPI000233A30D	0	97.52	UniRef100_B9RS30 Catalytic, putative n=1 Tax=Ricinus communis RepID=B9RS30_RICCO	0	88.37	AT5G25770.1 | Symbols: | alpha/beta-Hydrolases superfamily protein | chr5:8969308-8971389 REVERSE LENGTH=360	1e-165	85.89	GO:0008150 GO:0010260 GO:0046482	biological process; organ senescence; para-aminobenzoic acid metabolic process	NA	NA	GO:0009507	chloroplast	PF00326 PF01738	Prolyl oligopeptidase family; Dienelactone hydrolase family	PTHR17630 PTHR17630:SF20	DIENELACTONE HYDROLASE; CARBOXYMETHYLENEBUTENOLIDASE	NA	NA	NA	NA	NA	NA
Glyma06g08800	308	UniRef100_I1K9B7 Uncharacterized protein n=1 Tax=Glycine max RepID=I1K9B7_SOYBN	0	99.68	UniRef100_G7ZWF1 U-box domain-containing protein n=1 Tax=Medicago truncatula RepID=G7ZWF1_MEDTR	1e-96	95.13	AT5G11550.1 | Symbols: | ARM repeat superfamily protein | chr5:3708203-3709147 REVERSE LENGTH=314	5e-78	96.1	GO:0008150	biological process	NA	NA	GO:0005737	cytoplasm	NA	NA	NA	NA	NA	NA	NA	NA	NA	NA
Glyma06g08810	984	UniRef100_I1K9B8 Uncharacterized protein n=1 Tax=Glycine max RepID=I1K9B8_SOYBN	0	99.9	UniRef100_B9RS37 Catalytic, putative n=1 Tax=Ricinus communis RepID=B9RS37_RICCO	0	99.7	AT5G11560.1 | Symbols: | catalytics | chr5:3709734-3713994 REVERSE LENGTH=982	0	99.7	GO:0006888	ER to Golgi vesicle-mediated transport	GO:0003824	catalytic activity	GO:0005773 GO:0005774 GO:0005783 GO:0005794 GO:0005886 GO:0009507	vacuole; vacuolar membrane; endoplasmic reticulum; Golgi apparatus; plasma membrane; chloroplast	PF07774	Protein of unknown function (DUF1620)	PTHR21573	UNCHARACTERIZED	KOG2103	Uncharacterized_conserved_protein	NA	NA	NA	NA
Glyma06g08820	434	UniRef100_I1K9B9 Uncharacterized protein n=1 Tax=Glycine max RepID=I1K9B9_SOYBN	0	99.77	UniRef100_G7ZWJ7 Galactosylgalactosylxylosylprotein 3-beta-glucuronosyltransferase n=1 Tax=Medicago truncatula RepID=G7ZWJ7_MEDTR	0	99.77	AT1G27600.2 | Symbols: IRX9-L, I9H | Nucleotide-diphospho-sugar transferases superfamily protein | chr1:9604083-9605881 REVERSE LENGTH=394	3e-119	99.08	GO:0006486 GO:0009834 GO:0010417 GO:0010584	protein glycosylation; secondary cell wall biogenesis; glucuronoxylan biosynthetic process; pollen exine formation	GO:0015018 GO:0016757 GO:0042285	galactosylgalactosylxylosylprotein 3-beta-glucuronosyltransferase activity; transferase activity, transferring glycosyl groups; xylosyltransferase activity	GO:0005794 GO:0016020	Golgi apparatus; membrane	PF03360	Glycosyltransferase family 43	PTHR10896 PTHR10896:SF1	BETA-1,3-GLUCURONYLTRANSFERASE; BETA-1,3-GLUCURONYLTRANSFERASE-RELATED	KOG1476	Beta-1,3-glucuronyltransferase_B3GAT1/SQV-8	NA	NA	NA	NA
Glyma06g08850	481	UniRef100_I1K9C2 Uncharacterized protein n=2 Tax=Glycine max RepID=I1K9C2_SOYBN	0	99.79	UniRef100_G7ZWJ2 Tocopherol cyclase n=1 Tax=Medicago truncatula RepID=G7ZWJ2_MEDTR	0	99.79	AT4G32770.1 | Symbols: VTE1, ATSDX1 | tocopherol cyclase, chloroplast / vitamin E deficient 1 (VTE1) / sucrose export defective 1 (SXD1) | chr4:15804981-15807790 FORWARD LENGTH=488	0	99.79	GO:0006631 GO:0006979 GO:0009266 GO:0009644 GO:0009915 GO:0010189 GO:0010264 GO:0015994 GO:0016122 GO:0031347	fatty acid metabolic process; response to oxidative stress; response to temperature stimulus; response to high light intensity; phloem sucrose loading; vitamin E biosynthetic process; myo-inositol hexakisphosphate biosynthetic process; chlorophyll metabolic process; xanthophyll metabolic process; regulation of defense response	GO:0009976	tocopherol cyclase activity	GO:0009507 GO:0009534 GO:0009706 GO:0009941 GO:0010287	chloroplast; chloroplast thylakoid; chloroplast inner membrane; chloroplast envelope; plastoglobule	NA	NA	NA	NA	NA	NA	NA	NA	K09834	tocopherol_cyclase
Glyma06g08860	388	UniRef100_I1K9C4 Uncharacterized protein n=1 Tax=Glycine max RepID=I1K9C4_SOYBN	0	94.33	UniRef100_G7ZWI8 5'-methylthioadenosine/S-adenosylhomocysteine nucleosidase n=1 Tax=Medicago truncatula RepID=G7ZWI8_MEDTR	0	98.71	AT4G28940.1 | Symbols: | Phosphorylase superfamily protein | chr4:14274414-14276920 FORWARD LENGTH=348	2e-136	80.93	GO:0009116	nucleoside metabolic process	GO:0003824	catalytic activity	GO:0005886	plasma membrane	PF01048	Phosphorylase superfamily	PTHR21234 PTHR21234:SF10	PURINE NUCLEOSIDE PHOSPHORYLASE; SUBFAMILY NOT NAMED	NA	NA	NA	NA	NA	NA
Glyma06g08880	429	UniRef100_I1K9C5 Uncharacterized protein n=1 Tax=Glycine max RepID=I1K9C5_SOYBN	0	99.77	UniRef100_G7ZWI6 Casein kinase I isoform delta-like protein n=1 Tax=Medicago truncatula RepID=G7ZWI6_MEDTR	0	98.37	AT4G28880.1 | Symbols: ckl3 | casein kinase I-like 3 | chr4:14251351-14254048 FORWARD LENGTH=415	0	98.14	GO:0006468	protein phosphorylation	GO:0004672 GO:0004674 GO:0005524 GO:0016301 GO:0016772	protein kinase activity; protein serine/threonine kinase activity; ATP binding; kinase activity; transferase activity, transferring phosphorus-containing groups	GO:0005575	cellular component	PF00069	Protein kinase domain	PTHR11909 PTHR11909:SF18	CASEIN KINASE-RELATED; CASEIN KINASE	KOG1163	Casein_kinase_(serine/threonine/tyrosine_protein_kinase)	NA	NA	NA	NA
Glyma06g08910	247	UniRef100_I1K9C8 Uncharacterized protein n=2 Tax=Glycine max RepID=I1K9C8_SOYBN	3e-172	99.6	UniRef100_B9RS20 Tonoplast intrinsic protein, putative n=1 Tax=Ricinus communis RepID=B9RS20_RICCO	9e-140	99.6	AT2G25810.1 | Symbols: TIP4;1 | tonoplast intrinsic protein 4;1 | chr2:11012658-11013906 FORWARD LENGTH=249	2e-126	99.19	GO:0006810 GO:0006833 GO:0009736 GO:0055085	transport; water transport; cytokinin mediated signaling pathway; transmembrane transport	GO:0005215 GO:0015250	transporter activity; water channel activity	GO:0005737 GO:0009705 GO:0016020 GO:0016021 GO:0042807	cytoplasm; plant-type vacuole membrane; membrane; integral to membrane; central vacuole	PF00230	Major intrinsic protein	PTHR19139 PTHR19139:SF51	AQUAPORIN TRANSPORTER; SUBFAMILY NOT NAMED	KOG0223	Aquaporin_(major_intrinsic_protein_family)	NA	NA	K09873	aquaporin_TIP
Glyma06g08920	458	UniRef100_UPI0002339C71 UPI0002339C71 related cluster n=1 Tax=unknown RepID=UPI0002339C71	0	99.13	UniRef100_B9RS19 F-box and wd40 domain protein, putative n=1 Tax=Ricinus communis RepID=B9RS19_RICCO	6e-143	55.68	AT3G50390.1 | Symbols: | Transducin/WD40 repeat-like superfamily protein | chr3:18702137-18703546 FORWARD LENGTH=469	4e-85	72.71	GO:0008150	biological process	GO:0000166	nucleotide binding	GO:0005634 GO:0005834	nucleus; heterotrimeric G-protein complex	PF00400	WD domain, G-beta repeat	PTHR22844	F-BOX AND WD40 DOMAIN PROTEIN	KOG0266	WD40_repeat-containing_protein	NA	NA	NA	NA
Glyma06g08930	411	UniRef100_I1K9D1 Uncharacterized protein n=1 Tax=Glycine max RepID=I1K9D1_SOYBN	0	95.86	UniRef100_B9RS17 Ring finger protein, putative n=1 Tax=Ricinus communis RepID=B9RS17_RICCO	1e-87	89.29	AT2G20030.1 | Symbols: | RING/U-box superfamily protein | chr2:8647813-8648985 FORWARD LENGTH=390	6e-66	87.35	GO:0010043	response to zinc ion	GO:0008270	zinc ion binding	NA	NA	PF00097	Zinc finger, C3HC4 type (RING finger)	PTHR14155	RING FINGER PROTEIN 6/12/38	NA	NA	NA	NA	NA	NA
Glyma06g08960	638	UniRef100_UPI000233A319 UPI000233A319 related cluster n=1 Tax=unknown RepID=UPI000233A319	0	99.84	UniRef100_G7IB43 Exostosin-2 n=1 Tax=Medicago truncatula RepID=G7IB43_MEDTR	0	98.59	AT5G25820.1 | Symbols: | Exostosin family protein | chr5:8997248-8999574 REVERSE LENGTH=654	0	99.06	GO:0010413 GO:0045492	glucuronoxylan metabolic process; xylan biosynthetic process	GO:0003824	catalytic activity	GO:0005794 GO:0016020	Golgi apparatus; membrane	PF03016	Exostosin family	PTHR11062 PTHR11062:SF37	EXOSTOSIN (HEPARAN SULFATE GLYCOSYLTRANSFERASE)-RELATED; SUBFAMILY NOT NAMED	KOG1021	Acetylglucosaminyltransferase_EXT1/exostosin_1	NA	NA	NA	NA
Glyma06g08980	208	UniRef100_C6T414 Uncharacterized protein (Fragment) n=1 Tax=Glycine max RepID=C6T414_SOYBN	7e-144	99.52	UniRef100_G7IB34 Casein kinase I isoform delta-like protein n=1 Tax=Medicago truncatula RepID=G7IB34_MEDTR	5e-39	91.35	AT5G11600.1 | Symbols: | unknown protein; FUNCTIONS IN: molecular_function unknown; INVOLVED IN: biological_process unknown; LOCATED IN: chloroplast; EXPRESSED IN: 20 plant structures; EXPRESSED DURING: 11 growth stages; BEST Arabidopsis thaliana protein match is: unknown protein (TAIR:AT1G19990.1); Has 1807 Blast hits to 1807 proteins in 277 species: Archae - 0; Bacteria - 0; Metazoa - 736; Fung…	6e-48	91.83	GO:0008150	biological process	GO:0003674	molecular function	NA	NA	NA	NA	NA	NA	NA	NA	NA	NA	NA	NA
Glyma06g08990	195	UniRef100_C9WA59 AP2 domain-containing transcription factor 1 n=1 Tax=Glycine max RepID=C9WA59_SOYBN	4e-139	99.49	UniRef100_C9WA59 AP2 domain-containing transcription factor 1 n=1 Tax=Glycine max RepID=C9WA59_SOYBN	4e-139	99.49	AT5G11590.1 | Symbols: TINY2 | Integrase-type DNA-binding superfamily protein | chr5:3727789-3728499 REVERSE LENGTH=236	2e-68	96.92	GO:0006355 GO:0045893	regulation of transcription, DNA-dependent; positive regulation of transcription, DNA-dependent	GO:0003677 GO:0003700 GO:0043565	DNA binding; sequence-specific DNA binding transcription factor activity; sequence-specific DNA binding	GO:0005634	nucleus	PF00847	AP2 domain	NA	NA	NA	NA	NA	NA	K09286	EREBP-like_factor
Glyma06g09000	564	UniRef100_E2GK55 Carotenoid cleavage dioxygenase 8 n=1 Tax=Glycine max RepID=E2GK55_SOYBN	0	96.81	UniRef100_E2GK55 Carotenoid cleavage dioxygenase 8 n=1 Tax=Glycine max RepID=E2GK55_SOYBN	0	96.81	AT4G32810.1 | Symbols: CCD8, MAX4, ATCCD8 | carotenoid cleavage dioxygenase 8 | chr4:15828348-15831299 FORWARD LENGTH=570	0	85.82	GO:0009733 GO:0009830 GO:0009926 GO:0009965 GO:0010223 GO:0016121 GO:0016124	response to auxin stimulus; cell wall modification involved in abscission; auxin polar transport; leaf morphogenesis; secondary shoot formation; carotene catabolic process; xanthophyll catabolic process	GO:0016702	oxidoreductase activity, acting on single donors with incorporation of molecular oxygen, incorporation of two atoms of oxygen	GO:0009507 GO:0009570	chloroplast; chloroplast stroma	PF03055	Retinal pigment epithelial membrane protein	PTHR10543 PTHR10543:SF6	CARTENOID OXYGENASE; BETA-CAROTENE DIOXYGENASE	KOG1285	Beta,_beta-carotene_15,15'-dioxygenase_and_related_enzymes	NA	NA	NA	NA
Glyma06g09010	296	UniRef100_I1K9D8 Uncharacterized protein n=1 Tax=Glycine max RepID=I1K9D8_SOYBN	0	99.66	UniRef100_I0YN65 Probable transcriptional regulatory protein COCSUDRAFT_37977 n=1 Tax=Coccomyxa subellipsoidea C-169 RepID=I0YN65_9CHLO	8e-62	82.09	AT2G25830.1 | Symbols: | YebC-related | chr2:11019091-11021665 REVERSE LENGTH=331	2e-149	99.32	GO:0009073 GO:0016226 GO:0042819	aromatic amino acid family biosynthetic process; iron-sulfur cluster assembly; vitamin B6 biosynthetic process	NA	NA	GO:0009507	chloroplast	PF01709	Domain of unknown function DUF28	PTHR12532	UNCHARACTERIZED	KOG2972	Uncharacterized_conserved_protein	NA	NA	NA	NA
Glyma06g09020	1007	UniRef100_UPI000233A751 UPI000233A751 related cluster n=1 Tax=unknown RepID=UPI000233A751	0	97.62	NA	NA	NA	AT2G25800.1 | Symbols: | Protein of unknown function (DUF810) | chr2:11006138-11009728 REVERSE LENGTH=987	0	97.62	GO:0008150 GO:0009832 GO:0016049 GO:0030243	biological process; plant-type cell wall biogenesis; cell growth; cellulose metabolic process	NA	NA	GO:0009507	chloroplast	PF05664	Protein of unknown function (DUF810)	NA	NA	NA	NA	NA	NA	NA	NA
[truncated: 1,294 more rows]

## Sheet: Table S5
Supplementary Table S5: Candidate genes within cluster-06, cluster-10, cluster-13 and cluster-20 in ZY and K3N-RIL Populations and their relative expression data retrived from RNA-seq data available in soybase.
Cluster-06
[truncated: 2,411 more rows]

## Sheet: Table S6
Supplementary Table S6: Predicted candidate genes within cluster-06, cluster-10, cluster-13 and cluster-20 regions in both RI Populations (ZY & K3N) based on known functional annotation
[truncated: 103 more rows]

[truncated: 1 more sheets: Table S7]
